# Supplementary material for: Egr-5 is a post-mitotic regulator of planarian epidermal differentiation
Source: eLife journal article supplement (doi:10.7554/elife.10501), 2015-10-12
Supplement: supp [file elife_poa_e10501_Supplementary_File_1.xls]

## Sheet: chd4_p53_dn
id	chd4_d12	chd4_d15	p53_d12	p53_d15	p53_d18	chd4.12.padj	chd4.15.padj	p53.12.padj	p53.15.padj	p53.18.padj	flags	cloned	Top Swiss-prot ID	E-value	Swiss-prot description
SMED30000013	-4.00787	-7.02193	-2.80296	-3.54496	-3.40805	2.09548e-75	4.60976e-166	4.4187e-41	2.47423e-61	3.45101e-41	1		BGH3_PIG	2e-21	Transforming growth factor-beta-induced protein ig-h3
SMED30000015	-0.407723	-0.700323	-0.276498	-0.371916	-0.426206	3.65859e-07	8.18731e-20	0.00113939	3.26858e-06	1.97202e-06	3						flags	description
SMED30000032	-1.31939	-1.16862	-1.49936	-1.12362	-1.3442	2.68068e-12	9.76046e-10	2.21078e-15	4.51974e-09	2.33829e-09	2						1	genes significantly down-regulated in both chd4 and p53 RNAi data sets (p.adj <1e-13)
SMED30000038	-0.363845	-0.4369	-0.254261	-0.270875	-0.261566	6.30716e-16	4.88337e-23	5.85173e-08	3.34088e-09	4.11479e-07	3						2	unique genes significantly down-regulated in p53 RNAi data set only (p.adj <1e-13)
SMED30000040	-0.515841	-0.652693	-0.278466	-0.356477	-0.157407	4.5045e-10	1.40204e-15	0.00136077	2.08672e-05	0.148242	3						3	unique genes significantly down-regulated in chd4 RNAi data set only (p.adj <1e-13)
SMED30000058	-2.27016	-2.11806	-2.18404	-2.17861	-2.09631	1.73326e-81	8.57479e-71	1.09776e-76	1.35301e-73	1.31794e-49	1	Y
SMED30000064	-0.550567	-0.966287	-0.645502	-0.835152	-0.616786	1.63555e-06	8.70747e-18	1.83522e-08	2.07303e-13	2.94323e-06	3
SMED30000072	0.308737	-0.0252137	-0.371486	-1.1269	-2.58836	0.0155184	0.8893	0.00565354	3.52897e-19	8.80312e-50	2		CAF1_DROME	3e-149	Probable histone-binding protein Caf1
SMED30000112	-0.756893	-0.90108	-0.231282	-0.478576	-0.241904	1.68327e-25	6.81851e-36	0.00382272	5.49398e-11	0.00614596	3		GGT1_RAT	3e-126	Gamma-glutamyltranspeptidase 1
SMED30000114	-0.275365	-0.616081	-0.14147	-0.545863	-0.384618	0.00129579	1.68548e-16	0.148955	4.04669e-13	1.70505e-05	3		DBR1_CHICK	2e-129	Lariat debranching enzyme [Gallus gallus]
SMED30000134	-0.139289	-0.302535	-0.226935	-0.395607	-0.498222	0.0429695	4.50114e-07	0.000390131	2.80145e-11	6.49295e-14	2		RL4_URECA	4e-123	60S ribosomal protein L4
SMED30000190	0.296129	0.13655	-0.280286	-0.885544	-2.12321	0.0973822	0.510501	0.154972	1.35419e-07	8.94834e-22	2
SMED30000200	-0.529593	-0.498932	-0.413217	-0.371137	-0.244494	5.91944e-26	1.46145e-23	3.05108e-16	2.2658e-13	3.19849e-05	1		GALT1_PIG	0	Polypeptide N-acetylgalactosaminyltransferase 1
SMED30000203	-0.954742	-0.910564	-0.502124	-0.444528	-0.385287	6.47715e-28	4.83296e-26	1.10408e-08	3.91218e-07	0.000121279	3		GRM5_RAT	0	Metabotropic glutamate receptor 5
SMED30000211	-3.30829	-3.68096	-3.63841	-4.88102	-3.17804	1.70765e-16	3.51494e-14	7.66376e-19	4.78235e-17	3.44901e-08	1
SMED30000236	-0.690337	-0.950486	-0.212157	-0.292401	-0.303145	1.53205e-24	7.04543e-47	0.0050778	2.66e-05	0.000104305	3		ABHD4_HUMAN	1e-77	Abhydrolase domain-containing protein 4
SMED30000240	-0.248173	-0.301987	-0.321181	-0.447753	-0.586005	0.000370291	6.71507e-06	2.747e-06	1.01606e-11	1.81181e-15	2		RL10A_XENLA	1e-100	60S ribosomal protein L10a [Xenopus laevis]
SMED30000248	-1.03188	-1.01158	-0.572422	-0.564498	-0.663051	2.4868e-48	1.48721e-46	4.30809e-17	2.5203e-16	9.75535e-17	1		YPTC6_CHLRE	4e-65	Ras-related protein YPTC6 [Chlamydomonas reinhardtii]
SMED30000258	-6.23119	-7.01267	-3.34148	-4.77635	-5.14	1.85783e-105	3.79408e-117	4.59311e-45	3.82496e-76	1.66779e-58	1		MRP1_CHICK	0	Multidrug resistance-associated protein 1
SMED30000267	-0.487233	-0.781827	-0.280302	-0.666066	-0.571377	1.40369e-06	4.11099e-16	0.00860259	5.03236e-12	3.39557e-07	3		DUS4L_HUMAN	4e-71	tRNA-dihydrouridine(20a/20b) synthase [NAD(P)+]-like
SMED30000274	-0.602498	-0.689403	-0.0938143	0.0224889	-0.0299859	4.15479e-14	1.62639e-18	0.370296	0.855978	0.828558	3		TBC24_HUMAN	7e-36	TBC1 domain family member 24 [Homo sapiens]
SMED30000310	0.0941432	-0.363616	-0.216509	-0.763722	-1.60048	0.602458	0.00594704	0.172417	1.83487e-09	6.19353e-24	2
SMED30000396	0.0970046	-0.10577	-0.274411	-0.497756	-0.861204	0.472213	0.408809	0.0142192	1.01706e-06	6.77578e-14	2		FEN1_NEMVE	5e-165	Flap endonuclease 1
SMED30000430	-3.48454	-5.62233	-0.66534	-0.998547	-0.507276	1.81165e-92	7.46127e-149	1.54655e-05	2.91625e-11	0.00511098	3		RAC1_RAT	8e-87	Ras-related C3 botulinum toxin substrate 1
SMED30000443	-0.934241	-0.548955	-1.01999	-0.773174	-1.26721	9.53328e-15	1.26668e-05	2.15106e-17	1.2589e-09	3.12355e-16	1
SMED30000457	-3.91575	-4.33092	-0.313527	-0.918841	-0.91765	8.34664e-18	1.6248e-16	0.365841	0.00586545	0.039721	3		ACSS3_MOUSE	3e-151	Acyl-CoA synthetase short-chain family member 3, mitochondrial
SMED30000463	-0.536379	-0.61212	-0.220188	-0.272312	-0.24496	1.71016e-15	4.53125e-20	0.00321596	0.000125326	0.00279525	3		SDF2L_BOVIN	4e-61	Stromal cell-derived factor 2-like protein 1
SMED30000467	-0.79398	-1.75602	0.421498	-0.0512356	-0.185403	5.86218e-09	4.41408e-38	0.00219164	0.80029	0.293768	3
SMED30000483	-1.59799	-1.62066	-0.410951	-0.500205	-0.932316	3.43797e-25	4.08105e-27	0.00709817	0.000534574	3.91964e-08	3		STK33_MOUSE	1e-57	Serine/threonine-protein kinase 33 [Mus musculus]
SMED30000537	-1.78049	-2.61677	-0.415725	-0.704837	-0.832761	8.68668e-26	1.1118e-54	0.010517	4.02963e-07	2.19188e-07	3
SMED30000542	-0.553743	-0.404757	-0.0510098	0.150374	-0.0501303	5.36708e-22	5.38603e-12	0.54911	0.017424	0.595108	3		ABHD3_HUMAN	9e-102	Phospholipase ABHD3
SMED30000545	-0.992015	-0.970327	-0.144432	-0.156568	0.109445	2.51317e-57	6.77353e-58	0.0364758	0.0163493	0.160052	3		NFAT5_MOUSE	3e-80	Nuclear factor of activated T-cells 5
SMED30000562	-0.806369	-0.84688	0.237498	0.50417	0.24618	4.33122e-40	8.29951e-44	0.000289416	5.63569e-17	0.000655289	3		ACSS3_HUMAN	0	Acyl-CoA synthetase short-chain family member 3, mitochondrial
SMED30000639	-1.37931	-1.27249	-0.812989	-0.60876	-0.707151	6.80016e-57	4.12571e-49	1.25202e-20	4.62691e-12	1.08604e-12	1	Y	DYST_MOUSE	2e-70	Dystonin
SMED30000647	-1.23251	-1.46491	-0.378126	-0.299921	-0.256643	2.50829e-41	2.91505e-56	6.79659e-05	0.00189019	0.024277	3
SMED30000656	-0.760252	-0.952767	-0.32701	-0.296442	-1.41377	3.56551e-07	5.69236e-11	0.0444571	0.0622071	2.80952e-16	2		CNBD2_MACFA	6e-17	Cyclic nucleotide-binding domain-containing protein 2 [Macaca fascicularis]
SMED30000684	-2.80008	-3.66784	-2.76318	-3.5828	-2.33697	5.31115e-32	1.90737e-33	2.30317e-33	1.27593e-32	5.57682e-16	1
SMED30000689	-1.19089	-1.42949	-0.605661	-0.662766	-0.593608	7.05645e-24	1.75042e-32	2.85575e-07	1.74888e-08	1.04504e-05	3
SMED30000691	-0.201699	-0.532976	-0.217055	-0.498418	-0.630941	0.00148818	1.38208e-20	0.000671569	8.61432e-18	5.76006e-22	1		IF4A3_DROME	0	Eukaryotic initiation factor 4A-III
SMED30000696	-0.32281	-0.506967	-0.206087	-0.279412	-0.197145	4.04546e-09	6.04793e-22	0.0003649	2.77281e-07	0.00211533	3		LITA_LATTR	2e-09	Alpha-latroinsectotoxin-Lt1a
SMED30000701	-1.56874	-0.819068	-0.86669	-0.663771	-0.691728	2.52544e-23	1.55518e-07	1.89848e-08	3.08906e-05	0.000138672	3
SMED30000746	0.19538	0.0149379	-0.947911	-1.38039	-2.41835	0.129192	0.93352	2.62218e-19	6.39357e-40	8.81503e-82	2
SMED30000781	-1.1221	-1.89668	-0.54082	-0.870502	-0.631225	1.02835e-29	8.58874e-79	8.166e-08	1.88893e-19	1.04282e-08	1
SMED30000800	-0.117957	-0.24228	-0.294448	-0.57285	-0.830524	0.126204	0.000226577	9.13992e-06	9.54574e-20	6.4332e-31	2		RL10A_XENLA	8e-100	60S ribosomal protein L10a [Xenopus laevis]
SMED30000819	-0.341638	-0.572315	0.0138872	-0.0348407	-0.00586785	3.8479e-06	1.94835e-16	0.914944	0.742465	0.965554	3		ASM3B_HUMAN	2e-44	Acid sphingomyelinase-like phosphodiesterase 3b
SMED30000827	-0.916902	-1.28183	-1.10216	-1.32113	-1.70067	5.81261e-24	4.38492e-45	1.28734e-33	3.86505e-47	7.39657e-56	1	Y
SMED30000850	-1.17335	-1.05081	-1.09768	-1.10823	-0.91912	1.98962e-31	2.73306e-26	6.305e-29	1.93969e-28	8.89999e-14	1		XCT_HUMAN	8e-100	Cystine/glutamate transporter
SMED30000853	-0.488588	-0.818095	-0.495133	-0.547551	-0.633364	9.84834e-09	3.74165e-23	8.33678e-09	7.07126e-11	2.43551e-11	3		TPMT_BORPD	9e-34	Thiopurine S-methyltransferase
SMED30000878	-0.194258	-0.194998	-0.226026	-0.377568	-0.0621594	0.000162218	7.44481e-05	8.98048e-06	2.70775e-15	0.380018	2		F91A1_DANRE	0	Protein FAM91A1 [Danio rerio]
SMED30000887	-0.279009	-0.622705	-0.37215	-0.822099	-0.867255	0.0209728	2.79554e-09	0.0013066	1.22694e-14	7.74497e-12	2		WDR12_ANOGA	7e-23	Ribosome biogenesis protein WDR12 homolog [Anopheles gambiae]
SMED30000891	-1.34146	-3.12554	-0.744592	-1.13426	-0.968911	3.40776e-16	1.36156e-50	7.08351e-06	9.40235e-11	2.86367e-06	3
SMED30000902	-2.06402	-2.78224	-2.5718	-2.80958	-3.53498	2.46514e-45	2.07557e-74	1.66573e-65	1.01968e-74	2.73681e-73	1	Y
SMED30000934	-1.2883	-1.71005	-2.71612	-4.55375	-4.05847	3.94506e-09	8.29448e-16	1.47071e-26	5.30985e-47	1.90407e-25	1		SVOPL_DANRE	3e-53	Putative transporter SVOPL
SMED30000967	-1.963	-3.24047	-0.731919	-1.07744	-0.799256	1.25155e-51	3.29014e-126	5.49749e-08	1.25847e-16	1.08987e-07	1
SMED30000991	-1.08314	-2.70953	-0.640911	-0.925165	-0.162242	2.7501e-10	1.34591e-39	0.000212872	9.19121e-08	0.534949	3		RAPH1_HUMAN	2e-19	Ras-associated and pleckstrin homology domains-containing protein 1
SMED30001026	-0.288646	-0.705672	-0.484457	-0.696182	-0.664502	0.000345622	1.70627e-21	4.04906e-10	1.40443e-20	6.21596e-15	1		RL7_CAEEL	1e-44	60S ribosomal protein L7 [Caenorhabditis elegans]
SMED30001057	0.823811	0.832353	0.372557	-0.136529	-1.34701	2.89974e-13	1.21358e-14	0.00454915	0.413899	5.235e-16	2		MCM10_XENTR	7e-49	Protein MCM10 homolog [Xenopus (Silurana) tropicalis]
SMED30001068	-1.97528	-4.24556	-1.09155	-1.87045	-2.36248	3.30699e-45	4.41289e-145	4.13929e-15	2.57331e-40	2.88982e-44	1		NHEB_ONCMY	3e-63	Na(+)/H(+) exchanger beta
SMED30001096	-0.22517	-0.4721	-0.24716	-0.539218	-0.612691	0.000902641	3.83038e-14	0.000279784	7.73646e-18	5.91193e-18	1		RS23_LUMRU	3e-86	40S ribosomal protein S23 [Lumbricus rubellus]
SMED30001121	-2.90982	-4.5026	-0.957964	-1.50077	-1.41261	2.15482e-145	6.24138e-237	1.5138e-22	5.54455e-50	3.3565e-34	1	Y	GRM3_RAT	1e-79	Metabotropic glutamate receptor 3
SMED30001129	-0.80719	-0.794179	-0.339129	-0.234475	-0.18616	8.55764e-14	1.00181e-14	0.00183588	0.0315498	0.160874	3
SMED30001151	-0.710008	-0.570993	-0.296814	-0.285351	-0.240243	4.84498e-33	1.13817e-21	1.39728e-06	4.14092e-06	0.000852485	3		BCDO2_MOUSE	8e-105	Beta,beta-carotene 9',10'-oxygenase
SMED30001172	-0.565515	-0.803714	-0.324083	-0.387118	-0.411365	6.22035e-16	1.44032e-31	1.30776e-05	7.01758e-08	3.54638e-07	3		EF1B_ARTSA	4e-75	Elongation factor 1-beta
SMED30001174	-0.722743	-0.903326	-0.394233	-0.652517	-0.414057	1.82583e-15	3.68524e-23	2.14209e-05	7.28786e-13	9.59986e-05	3
SMED30001222	-0.824228	-1.18509	-0.531594	-0.675781	-0.645745	3.53471e-12	5.96581e-24	1.00581e-05	6.42894e-09	1.61141e-06	3		ETHE1_HUMAN	2e-94	Persulfide dioxygenase ETHE1, mitochondrial
SMED30001279	-1.91159	-1.70932	-1.17107	-1.12943	-1.00088	5.47679e-88	8.57479e-71	7.26542e-39	2.0225e-34	6.36595e-21	1		WBS27_HUMAN	1e-11	Williams-Beuren syndrome chromosomal region 27 protein [Homo sapiens]
SMED30001290	-0.543016	-0.659478	-0.359775	-0.449937	-0.654464	4.78528e-12	7.94671e-19	6.32404e-06	2.03855e-09	1.85226e-13	3		SEM5A_RAT	1e-49	Semaphorin-5A
SMED30001294	-0.215061	-0.438069	-0.201139	-0.346911	-0.164103	9.5404e-05	1.15131e-17	0.000369143	3.41158e-11	0.0103421	3		PICAL_DROME	1e-113	Phosphatidylinositol-binding clathrin assembly protein LAP
SMED30001319	-3.75382	-7.25785	-1.91847	-2.54661	-2.2878	5.6162e-83	1.3432e-171	2.8215e-27	2.49288e-45	7.26524e-28	1		NCKX5_DANRE	2e-114	Sodium/potassium/calcium exchanger 5
SMED30001325	-0.160041	-0.232819	-0.669391	-0.617088	-1.20167	0.077171	0.00481894	4.38654e-18	1.7204e-15	7.33014e-39	2		BAC2_ARATH	1e-32	Mitochondrial arginine transporter BAC2
SMED30001329	-0.789924	-0.753819	-0.596632	-0.574657	-0.556586	1.31054e-20	1.60108e-18	2.12022e-12	3.32379e-11	1.56326e-08	3
SMED30001362	0.123263	-0.0748959	-0.198953	-0.585917	-0.960653	0.0736249	0.31779	0.00187233	1.26431e-24	2.08817e-49	2		PIWL1_CHICK	0	Piwi-like protein 1 [Gallus gallus]
SMED30001371	-0.747784	-0.702688	-0.75825	-0.79817	-0.262122	7.50775e-34	1.10549e-31	3.33336e-35	1.74282e-39	0.000321122	1		NEC1_MOUSE	6e-83	Neuroendocrine convertase 1
SMED30001391	-0.262169	-0.650516	-0.888328	-1.63141	-3.38564	0.238521	0.00113169	4.13384e-06	5.59677e-14	1.23352e-26	2		MCM8_RAT	0	DNA helicase MCM8
SMED30001419	-0.475001	-0.566729	-0.341497	-0.313436	-0.528429	2.55759e-15	1.60159e-21	4.07655e-08	4.4114e-07	9.80561e-15	1		PEPD_HUMAN	0	Xaa-Pro dipeptidase
SMED30001471	-1.54948	-1.74967	-1.07457	-1.10537	-1.69973	2.43005e-56	1.29547e-68	2.09711e-31	3.52197e-32	7.71968e-48	1	Y	CP2BB_CANFA	1e-63	Cytochrome P450 2B11
SMED30001478	-0.339632	-0.579417	0.123884	0.00156046	-0.0013891	1.59657e-06	6.381e-18	0.133768	0.988669	0.99155	3		DYNB_DICDI	2e-20	Dynamin-B [Dictyostelium discoideum]
SMED30001479	-0.824199	-0.932645	-0.125093	0.179036	-0.297219	2.30346e-39	1.68443e-50	0.118603	0.0114124	6.71909e-05	3
SMED30001482	-1.24249	-1.2624	-0.349615	-0.418445	-0.429074	4.08375e-31	6.45673e-32	0.00167767	0.0001104	0.000493215	3		MGLL_RAT	1e-45	Monoglyceride lipase
SMED30001485	0.181131	0.0792954	-0.164222	-0.420208	-0.632783	0.00134006	0.218376	0.00575983	1.56624e-15	4.98186e-26	2		TDR12_HUMAN	3e-42	Putative ATP-dependent RNA helicase TDRD12
SMED30001490	-1.58128	-1.94684	-0.605111	-0.654319	-0.550029	2.24974e-59	2.72972e-87	1.86951e-09	4.35942e-11	1.37672e-06	3		COFI_ZYGRO	8e-24	Cofilin
SMED30001495	-0.193364	-0.328983	-0.251682	-0.387	-0.525424	0.00436327	1.37789e-07	0.000142098	5.59319e-10	4.16526e-14	2		RL15_CHITE	3e-76	60S ribosomal protein L15
SMED30001540	-0.697045	-0.869076	-0.0408907	-0.002895	0.0304343	2.43866e-16	1.1435e-25	0.776102	0.983694	0.838908	3		HOT_MOUSE	2e-175	Hydroxyacid-oxoacid transhydrogenase, mitochondrial
SMED30001567	-1.89239	-2.43534	-2.3407	-2.62868	-3.42147	3.59324e-57	1.23664e-87	7.48653e-83	1.8739e-98	3.083e-105	1	Y
SMED30001601	-0.0303315	-0.159149	-0.559316	-0.623498	-0.627385	0.704311	0.00360152	6.17145e-28	1.38034e-34	7.65784e-27	2		GFI1_HUMAN	5e-11	Zinc finger protein Gfi-1
SMED30001622	-1.13574	-1.19042	-0.616372	-0.578548	-0.362767	5.48758e-31	1.44385e-33	7.16024e-11	1.37434e-09	0.00117272	3
SMED30001635	-0.824759	-0.776584	-0.413222	-0.669781	-0.237683	2.05106e-28	1.95889e-25	1.65841e-07	7.85617e-19	0.011578	1		CATB_RAT	1e-134	Cathepsin B
SMED30001652	-2.02662	-5.41968	-0.488307	-1.09935	-0.66535	1.6022e-42	1.25188e-164	0.00214664	1.03424e-13	0.000132146	3
SMED30001661	0.134598	-0.101078	-0.167268	-0.501721	-0.665358	0.0678306	0.183865	0.0219087	2.06935e-15	6.30991e-20	2		KDM1B_MOUSE	4e-36	Lysine-specific histone demethylase 1B
SMED30001680	-0.524209	-0.650674	0.0197979	-0.017742	-0.0111482	1.4146e-12	2.83476e-19	0.884627	0.886918	0.937438	3
SMED30001725	-0.717551	-1.29487	-0.52573	-0.849352	-0.43091	4.15457e-11	1.13788e-31	1.64005e-06	3.30766e-15	0.000868269	1
SMED30001740	-0.840202	-0.852878	-0.559911	-0.600074	-0.498503	6.13882e-59	4.22181e-61	4.28336e-27	6.14364e-31	4.92407e-17	1		STRUM_DANRE	0	WASH complex subunit strumpellin [Danio rerio]
SMED30001818	-0.546299	-0.466667	-0.218201	-0.232583	-0.0999928	7.48661e-16	2.92876e-12	0.00215596	0.000885613	0.296389	3		TRAF2_MOUSE	7e-10	TNF receptor-associated factor 2
SMED30001853	-0.429968	-0.553572	-0.11142	-0.0682597	-0.00693674	7.15913e-15	1.12566e-24	0.101734	0.349528	0.949622	3		SRK1_SPOLA	1e-10	Tyrosine-protein kinase isoform SRK1 [Spongilla lacustris]
SMED30001863	-0.478848	-0.458714	-0.253926	-0.279615	-0.220561	5.67151e-23	1.1165e-21	5.9603e-07	1.65758e-08	0.00012218	3		PP6R1_HUMAN	2e-34	Serine/threonine-protein phosphatase 6 regulatory subunit 1
SMED30001895	-0.624124	-0.748354	-0.517825	-0.486055	-0.587314	2.28102e-13	1.27571e-18	1.99666e-09	1.91714e-08	4.40251e-09	3		DHB12_XENTR	7e-74	Very-long-chain 3-oxoacyl-CoA reductase
SMED30001950	-0.36538	-0.270142	-0.438045	-0.363326	-0.282125	5.56989e-14	3.05624e-08	1.2595e-19	8.50406e-14	6.61595e-07	1		NTRK2_CHICK	1e-32	BDNF/NT-3 growth factors receptor
SMED30001962	-0.375697	-0.637856	-0.341212	-0.439898	-0.247924	4.20606e-08	1.52767e-22	1.09929e-06	4.92455e-11	0.00185523	3		YODA_ARATH	1e-30	Mitogen-activated protein kinase kinase kinase YODA
SMED30001983	-1.41032	-1.57261	-0.603161	-0.829926	-0.420497	6.77779e-18	2.30321e-21	0.00011769	1.12771e-07	0.030723	3
SMED30001997	0.193689	-0.165436	-2.3763	-2.924	-4.04662	0.443988	0.518176	1.47636e-21	3.83989e-28	1.46674e-22	2
SMED30002004	-1.04912	-1.18209	0.299192	0.422622	0.254962	5.33426e-17	4.92675e-20	0.0197362	0.000424685	0.0973916	3		RNOY_CRAGI	2e-28	Ribonuclease Oy
SMED30002013	-1.29998	-1.76644	-0.421564	-0.435322	-1.53239	2.29692e-24	2.87065e-42	0.000713899	0.00025923	2.71823e-27	1
SMED30002072	-0.00319003	-0.227898	-0.468841	-0.204285	-1.13802	0.990769	0.019905	2.5358e-07	0.0445793	4.59773e-30	2		NF60_DORPE	2e-75	60 kDa neurofilament protein
SMED30002081	-0.330327	-0.6706	-1.30701	-1.79842	-1.84037	0.00775271	6.43088e-09	3.33624e-27	1.96624e-44	1.73084e-31	2
SMED30002098	-0.954985	-1.25843	-1.29324	-1.55693	-1.96097	3.00479e-37	1.4198e-61	2.96283e-65	1.14274e-88	3.94662e-94	1	Y	CBPN_BOVIN	4e-69	Carboxypeptidase N catalytic chain
SMED30002106	-0.0776144	-0.227814	-0.215906	-0.318838	-0.474098	0.232346	1.09265e-05	6.0378e-05	4.42326e-10	8.06303e-17	2		IWS1_HUMAN	2e-51	Protein IWS1 homolog
SMED30002120	0.320274	0.227928	-0.0986134	-0.575182	-0.987925	0.00020518	0.00992688	0.411107	3.31587e-11	7.2878e-22	2		SAE2_MOUSE	5e-151	SUMO-activating enzyme subunit 2
SMED30002134	-0.0219232	-0.28352	-2.85055	-3.67858	-4.44689	0.955377	0.297623	5.95197e-38	1.29097e-58	1.11506e-55	2
SMED30002136	-2.35911	-2.86198	-0.725648	-0.799727	-0.442052	1.47459e-150	4.50448e-199	1.07451e-17	4.60094e-21	7.95924e-06	1
SMED30002138	-0.643529	-0.67272	-0.428262	-0.553186	-0.322331	7.51648e-25	4.15016e-27	1.46515e-11	1.60429e-18	1.28985e-05	1		S36A4_XENLA	2e-63	Proton-coupled amino acid transporter 4
SMED30002139	-0.361432	-0.53863	-0.167168	-0.30013	-0.12306	1.07717e-06	1.38289e-14	0.0504233	4.56027e-05	0.204949	3		VMP1_DANRE	7e-94	Vacuole membrane protein 1
SMED30002213	-0.561194	-0.817134	-0.516484	-0.651508	-0.472123	6.2841e-17	2.14935e-35	1.77151e-14	6.14385e-23	6.43557e-10	1	Y	GLAS_DROVI	5e-16	Protein glass [Drosophila virilis]
SMED30002215	-1.75525	-2.18322	-1.49489	-2.17062	-1.84485	4.99562e-31	1.94425e-44	3.93024e-24	1.18242e-43	1.07591e-22	1	Y
SMED30002242	-2.15282	-2.86954	-4.31729	-5.04937	-3.96981	2.71914e-59	7.01241e-83	4.12908e-148	9.42909e-148	2.27532e-84	1	Y	NUCB1_RAT	5e-31	Nucleobindin-1
SMED30002286	-0.41548	-0.626468	0.0817457	-0.152096	-0.505013	6.54735e-12	3.30564e-26	0.298791	0.0211569	6.41414e-14	1		FTCD_PIG	3e-117	Formimidoyltransferase-cyclodeaminase
SMED30002317	-0.76562	-0.696588	-0.452832	-0.304664	-0.416063	6.95762e-23	2.27158e-19	1.26573e-08	0.000192588	3.68248e-06	3		HELZ2_MOUSE	2e-67	Helicase with zinc finger domain 2
SMED30002332	-1.33296	-1.47647	-0.477148	-0.563462	-0.300124	3.61567e-64	8.05342e-78	1.54304e-09	4.29577e-13	0.00122836	3		TRAF2_MOUSE	5e-10	TNF receptor-associated factor 2
SMED30002334	-0.591225	-0.6622	-0.432466	-0.318811	-0.414202	3.39841e-15	4.74081e-19	1.61298e-08	3.85062e-05	1.11694e-06	3
SMED30002340	-2.51258	-5.04582	-1.17442	-1.89359	-1.49438	4.54911e-37	8.38309e-80	5.82183e-12	1.12889e-26	4.94415e-14	1		S47A1_DANRE	1e-43	Multidrug and toxin extrusion protein 1
SMED30002348	0.68534	0.316218	-0.224932	-0.751635	-3.0317	0.00136137	0.171695	0.483564	0.00102476	2.56682e-17	2		CDC6_MOUSE	2e-52	Cell division control protein 6 homolog
SMED30002356	-2.59349	-3.38354	-3.93279	-4.95907	-4.4799	6.73239e-60	2.02854e-79	1.2365e-103	4.55573e-114	3.03334e-73	1	Y
SMED30002393	-0.682719	-0.725571	0.552241	0.720767	0.972861	4.46513e-19	2.916e-22	1.75971e-13	2.27294e-23	2.63692e-35	3		ACSS3_HUMAN	3e-148	Acyl-CoA synthetase short-chain family member 3, mitochondrial
SMED30002436	0.441232	0.212174	-0.084579	-0.989934	-2.81678	0.000457371	0.132668	0.666524	2.4353e-15	3.61847e-62	2		H2AJ_CHICK	2e-54	Histone H2A.J
SMED30002442	-1.31533	-1.33449	-0.787296	-0.773996	-1.05818	3.30904e-51	9.65496e-51	3.45455e-22	3.43302e-20	2.09686e-26	1		ACE_MESAU	5e-110	Angiotensin-converting enzyme
SMED30002443	-3.35147	-8.11088	-1.08904	-2.08235	-1.6264	8.01728e-64	1.77941e-106	5.61803e-15	2.49172e-39	6.40367e-21	1		S47A2_HUMAN	6e-30	Multidrug and toxin extrusion protein 2
SMED30002454	-0.450513	-0.558729	-0.298993	-0.260292	-0.246332	1.21204e-16	1.92984e-25	1.49485e-07	4.45843e-06	0.000130231	3		SND1_PONAB	0	Staphylococcal nuclease domain-containing protein 1
SMED30002486	-0.386754	-0.608129	-0.337018	-0.313086	-0.156785	1.61823e-06	6.8437e-15	4.12279e-05	0.000128119	0.136362	3		COPT1_MOUSE	2e-18	High affinity copper uptake protein 1
SMED30002505	-0.523793	-0.813991	-0.116265	-0.205087	0.0108055	4.54754e-12	2.26346e-28	0.234951	0.0120635	0.940054	3		PCY2_BOVIN	7e-120	Ethanolamine-phosphate cytidylyltransferase
SMED30002510	-2.64301	-3.09695	-0.263366	-0.108756	0.243638	6.27817e-242	6.22807e-305	0.000973036	0.247257	0.00558208	3		HUTU_HUMAN	0	Urocanate hydratase
SMED30002513	-1.34922	-1.92563	0.33498	0.350377	0.613546	1.30435e-54	1.11156e-107	0.000375964	0.000124759	1.38954e-10	3		HUTH_BOVIN	0	Histidine ammonia-lyase
SMED30002547	-0.791298	-0.932314	0.265318	0.597925	0.753593	5.47531e-19	6.57825e-26	0.00867454	2.71461e-11	1.01154e-14	3		CYPH_SCHPO	4e-65	Peptidyl-prolyl cis-trans isomerase
SMED30002551	-0.471937	-0.674311	-0.203776	-0.250776	-0.25087	4.14143e-10	2.64717e-20	0.0152774	0.00130994	0.00429921	3		TM41B_DANRE	4e-48	Transmembrane protein 41B [Danio rerio]
SMED30002575	-2.31382	-2.55817	2.06574	2.6169	1.89566	2.12595e-21	5.93974e-21	2.18593e-36	2.17306e-55	1.50943e-22	3
SMED30002589	-0.368552	-0.532613	-0.0953715	-0.11644	-0.0363977	9.9142e-10	6.9195e-20	0.220368	0.0979906	0.715829	3		OSBL2_MOUSE	7e-117	Oxysterol-binding protein-related protein 2
SMED30002600	0.0497708	0.149626	0.02858	0.0169312	-0.56152	0.520175	0.00821434	0.753746	0.847026	8.47208e-20	2		NWD2_HUMAN	3e-21	NACHT and WD repeat domain-containing protein 2
SMED30002603	-2.54763	-3.84291	-2.18225	-3.13834	-3.01438	2.50882e-106	3.13877e-189	2.44128e-82	4.01739e-142	1.01648e-95	1
SMED30002652	-1.94882	-2.3058	-0.391903	-0.369136	-0.555448	4.10411e-98	2.52771e-112	3.72186e-07	6.09785e-06	3.92067e-09	3		P20D2_HUMAN	9e-89	Peptidase M20 domain-containing protein 2
SMED30002664	-0.631625	-1.00465	-0.691159	-0.428464	-0.695519	5.67505e-16	3.92977e-39	1.05906e-18	4.15553e-08	6.60405e-16	1		ANKK1_HUMAN	1e-22	Ankyrin repeat and protein kinase domain-containing protein 1
SMED30002689	-0.913562	-0.940919	0.282841	0.33925	0.02243	1.02582e-20	9.26301e-22	0.00950817	0.00106512	0.903432	3
SMED30002703	-0.353166	-0.44265	-0.345913	-0.498448	-0.624373	5.7732e-07	1.21489e-10	1.50161e-06	5.27736e-13	9.0416e-16	2		RL23A_RAT	7e-39	60S ribosomal protein L23a [Rattus norvegicus]
SMED30002705	-0.615344	-0.701859	-1.24891	-1.09757	-1.6692	1.19974e-12	6.3221e-16	1.32098e-44	3.22442e-34	1.60061e-51	1
SMED30002716	-0.201028	-0.226931	-0.628584	-0.50202	-0.592894	0.00262705	0.000417679	1.9659e-24	4.50694e-16	4.06811e-17	2		CYLD_BOVIN	2e-25	Ubiquitin carboxyl-terminal hydrolase CYLD
SMED30002741	-1.99454	-2.3695	-0.418749	-0.942435	-1.17956	6.47715e-28	3.85085e-35	0.013928	8.82921e-09	1.31085e-09	3
SMED30002778	-1.00138	-1.21673	-0.308625	-0.517374	-0.30357	1.24405e-12	4.65192e-19	0.0361894	8.34915e-05	0.0490422	3		ANR44_CHICK	7e-41	Serine/threonine-protein phosphatase 6 regulatory ankyrin repeat subunit B
SMED30002799	-1.36898	-1.91706	0.17889	0.517722	0.25289	2.43662e-13	6.48739e-21	0.46543	0.00557277	0.321118	3
SMED30002834	1.09646	1.16601	-4.7027	-5.61568	-2.92721	3.25484e-06	4.01602e-07	1.27817e-42	1.07633e-48	1.62614e-17	2
SMED30002835	-0.92606	-0.784628	-0.397252	-0.483418	0.0145509	7.40796e-47	3.35344e-35	1.00394e-09	3.9904e-14	0.903502	1		PAO_MAIZE	2e-21	Polyamine oxidase
SMED30002839	-0.792564	-1.33069	-0.615491	-0.577818	-0.724835	9.15473e-20	5.92912e-51	1.73547e-12	2.20989e-11	3.56881e-13	3
SMED30002858	-0.328324	-0.283483	-0.827058	-0.661352	-0.83902	7.09746e-06	9.14895e-05	7.18793e-31	1.93223e-20	2.11415e-24	2		A1CF_HUMAN	8e-99	APOBEC1 complementation factor
SMED30002877	-0.227099	-0.509187	-0.662929	-0.856799	-1.26193	0.107167	1.72559e-05	6.11552e-08	4.68012e-13	2.87267e-19	2	Y	IQEC1_HUMAN	2e-11	IQ motif and SEC7 domain-containing protein 1
SMED30002903	-0.279153	-0.415036	-0.374074	-0.453341	-0.368567	4.0774e-07	1.61249e-15	5.83792e-12	5.84517e-18	1.15298e-09	1		CR3L1_RAT	2e-34	Cyclic AMP-responsive element-binding protein 3-like protein 1
SMED30002942	0.0520794	0.340142	-0.634384	-0.837358	-2.98493	0.899851	0.262124	0.0260902	0.00375279	6.427e-14	2
SMED30002958	-2.04372	-4.08519	-1.53453	-1.65231	-0.966257	7.24766e-13	3.64192e-25	6.62851e-09	4.29489e-09	0.00596914	3
SMED30002992	-0.243972	-0.214267	-1.15336	-1.50441	-2.00182	0.0200517	0.041818	2.25637e-36	2.85395e-60	2.38639e-75	2
SMED30003020	-0.33918	-0.585389	-0.431199	-0.680366	-0.751041	1.98908e-05	2.44786e-15	3.37681e-08	9.63923e-20	4.13106e-19	1		WAP53_MESAU	6e-82	Telomerase Cajal body protein 1
SMED30003024	-0.30174	-0.386105	-0.100675	-0.172256	-1.56892	0.000712508	6.06127e-06	0.393009	0.080049	3.17572e-58	2		CAV3_RAT	3e-20	Caveolin-3 [Rattus norvegicus]
SMED30003044	-1.8662	-2.48563	-3.79426	-4.36363	-4.33903	1.54976e-19	5.78154e-28	4.62544e-48	2.64905e-49	1.1329e-30	1	Y	CALUA_DANRE	5e-11	Calumenin-A
SMED30003053	-1.75834	-2.02851	-0.364901	-0.511031	-0.836017	6.08864e-141	5.39327e-181	1.45665e-08	4.43609e-16	9.61522e-30	1		PLCC_HUMAN	6e-57	1-acyl-sn-glycerol-3-phosphate acyltransferase gamma
SMED30003060	-0.677298	-0.725334	-0.0913794	-0.0827953	0.0766428	1.31908e-18	2.09234e-22	0.363118	0.38771	0.481044	3		NALP5_BOVIN	2e-09	NACHT, LRR and PYD domains-containing protein 5
SMED30003086	-0.396751	-0.587839	-0.301492	-0.312823	-0.268911	7.76502e-10	5.2431e-21	6.96286e-06	1.78276e-06	0.000347696	3		SAR1A_HUMAN	7e-89	GTP-binding protein SAR1a
SMED30003096	-0.443319	-0.733562	-0.419194	-0.43565	-0.381245	6.27187e-07	9.33657e-16	2.25828e-06	1.9718e-06	0.000387738	3		MGLL_RAT	2e-50	Monoglyceride lipase
SMED30003102	-3.80222	-6.98149	-1.82061	-2.70371	-2.56697	3.30122e-132	1.72694e-256	1.66631e-38	5.83788e-77	3.32404e-51	1		DEND3_MOUSE	3e-30	DENN domain-containing protein 3 [Mus musculus]
SMED30003138	-1.05711	-1.35572	-0.429843	-0.574353	-0.642556	2.97934e-36	8.35336e-57	6.51381e-07	1.12882e-11	3.6253e-11	3		ADA_XENTR	6e-81	Adenosine deaminase
SMED30003140	-1.21598	-1.15813	-0.714015	-0.812131	-0.631907	2.48418e-32	3.84062e-31	9.72791e-13	1.76478e-16	4.22904e-08	1		AT11B_HUMAN	0	Probable phospholipid-transporting ATPase IF
SMED30003145	-2.51921	-4.29271	-1.66166	-2.07084	-2.40733	5.56278e-10	1.82588e-17	9.58206e-06	9.04951e-08	4.50612e-07	3
SMED30003152	-1.11514	-1.51916	0.206347	0.380341	0.145238	1.74594e-41	1.19742e-72	0.0269761	3.59538e-06	0.184119	3		CRYL1_HUMAN	2e-48	Lambda-crystallin homolog
SMED30003163	-0.44567	-0.679699	-0.508646	-0.688628	-0.624468	3.8432e-10	3.16079e-22	6.14165e-13	1.97463e-22	4.90978e-14	1		DCUP_DANRE	2e-145	Uroporphyrinogen decarboxylase
SMED30003172	-0.518178	-0.638312	-0.85474	-1.02056	-1.18154	1.16464e-14	1.42652e-21	1.62542e-37	3.8593e-51	1.45878e-50	1	Y	PURA_SCHJA	0	Adenylosuccinate synthetase
SMED30003176	-0.202887	-0.384428	-0.226818	-0.413179	-0.535886	0.00272203	5.81256e-10	0.000814439	3.72528e-11	1.66433e-14	2		RS2_DROME	3e-104	40S ribosomal protein S2
SMED30003196	-0.426705	-0.732672	-0.165022	-0.332422	-0.0978462	4.18811e-14	4.66011e-40	0.00987684	5.95324e-09	0.211768	3		ADK1_ARATH	3e-109	Adenosine kinase 1
SMED30003218	-0.798303	-1.00616	-0.275289	-0.133873	-0.23596	1.63824e-10	2.54295e-15	0.0426293	0.393296	0.151753	3		FBXL2_PONAB	4e-08	F-box/LRR-repeat protein 2
SMED30003242	0.130318	-0.281168	-0.323761	-0.891623	-0.911228	0.303727	0.00551608	0.00315037	7.03458e-20	3.38109e-15	2	Y	WDR3_MOUSE	8e-78	WD repeat-containing protein 3 [Mus musculus]
SMED30003248	-3.31152	-6.62087	-2.0689	-2.67732	-3.08385	4.43255e-53	1.18984e-96	1.87073e-25	1.04768e-36	2.33778e-33	1		DHR11_HUMAN	3e-68	Dehydrogenase/reductase SDR family member 11
SMED30003259	0.0469844	0.0330145	-0.12361	-0.222222	-0.49184	0.523574	0.66245	0.0421513	3.2214e-05	1.11378e-17	2		PSA_HUMAN	0	Puromycin-sensitive aminopeptidase
SMED30003274	-0.283662	-0.313965	-0.894089	-0.910858	-1.07866	0.00251202	0.000646869	6.92852e-24	8.80819e-24	3.83875e-24	2
SMED30003282	-1.51897	-2.17896	-0.872541	-1.17403	-1.31109	6.10806e-18	1.86046e-31	2.17532e-07	4.34609e-12	1.27172e-12	3
SMED30003322	-0.677956	-0.664229	0.0759257	0.167701	-0.188481	4.18977e-14	1.90232e-13	0.557695	0.10117	0.113907	3		HYKK_XENLA	3e-19	Hydroxylysine kinase
SMED30003360	-1.63473	-2.73065	-0.533404	-0.962274	-0.681225	2.08136e-52	1.55662e-131	2.25736e-06	3.68959e-19	4.2636e-08	1		LIPG_CANFA	2e-108	Gastric triacylglycerol lipase
SMED30003392	-1.07206	-1.13954	-0.649878	-0.57325	-0.574992	1.42217e-13	2.56494e-16	5.37436e-06	3.16889e-05	0.000270475	3		MIB1_DANRE	4e-08	E3 ubiquitin-protein ligase mib1
SMED30003400	-0.75161	-1.14458	-0.921076	-1.05781	-1.59539	3.74912e-05	2.07456e-11	4.1629e-07	8.70711e-10	9.21815e-15	2
SMED30003442	-0.265721	-0.420252	-0.308711	-0.497007	-0.645793	0.00024301	7.50634e-10	1.83875e-05	3.57444e-13	4.37642e-17	2		RL23_CAEEL	6e-70	60S ribosomal protein L23 [Caenorhabditis elegans]
SMED30003448	-0.973869	-1.94205	0.962442	0.719531	1.19155	9.77941e-22	1.13849e-77	3.98868e-22	8.06969e-13	9.95369e-29	3		GNMT_MOUSE	8e-115	Glycine N-methyltransferase [Mus musculus]
SMED30003449	-0.381809	-0.488694	-0.857526	-1.11021	-1.45827	0.00505119	7.61606e-05	3.96844e-11	9.95281e-19	2.94097e-22	2	Y	CP2C7_RAT	4e-38	Cytochrome P450 2C7
SMED30003458	-1.65151	-1.59479	-0.709169	-0.684317	-1.50085	7.3264e-18	2.42636e-16	0.000104072	0.00025193	8.08552e-12	3		RB27B_MOUSE	1e-76	Ras-related protein Rab-27B [Mus musculus]
SMED30003475	-0.911099	-1.06909	0.0476454	0.137624	-0.0869044	3.71594e-30	8.83974e-39	0.696067	0.128996	0.45939	3		KFA_DANRE	2e-44	Kynurenine formamidase
SMED30003523	-0.311533	-0.72922	0.187904	0.175957	-0.0614907	6.43843e-05	1.17228e-23	0.0286399	0.0360428	0.603192	3		THNS2_RAT	4e-77	Threonine synthase-like 2
SMED30003592	0.211044	0.136328	-0.239866	-0.262717	-1.05412	0.0905308	0.330506	0.0651281	0.0444115	6.77514e-14	2
SMED30003593	0.0973189	-0.0768799	-0.227209	-0.502593	-0.693016	0.156119	0.270371	0.000142007	1.32723e-19	1.62731e-27	2		SMC3_XENLA	0	Structural maintenance of chromosomes protein 3
SMED30003599	-0.234826	-0.558502	-0.548732	-0.282204	-1.37917	0.114395	8.98534e-06	2.9178e-05	0.0392847	1.32439e-19	2		SYCP1_RAT	4e-05	Synaptonemal complex protein 1
SMED30003600	-1.25893	-1.66436	-0.607173	-0.825879	-0.602009	2.52311e-51	5.80297e-78	3.33958e-14	1.82291e-23	5.56282e-10	1		RAC1_RAT	9e-73	Ras-related C3 botulinum toxin substrate 1
SMED30003660	-0.876231	-1.05465	-0.666292	-0.613418	-0.523345	1.90198e-25	3.61814e-36	6.95642e-15	7.3532e-13	8.49677e-08	1		DYHC_DROME	0	Dynein heavy chain, cytoplasmic
SMED30003681	-0.646721	-0.652099	-0.473816	-0.595014	-0.197942	2.52537e-24	1.9544e-25	1.099e-13	3.89928e-21	0.0111387	1		ETV6_MOUSE	1e-07	Transcription factor ETV6
SMED30003698	-2.92014	-5.58462	-1.12364	-1.65751	-1.2309	9.20001e-67	1.43499e-160	6.15813e-12	1.54738e-24	4.66469e-11	1
SMED30003714	-1.6547	-2.13532	-0.773063	-1.04913	-0.817677	3.15128e-30	6.02833e-41	9.92758e-09	1.92609e-13	3.69055e-07	3		RHG20_RAT	6e-07	Rho GTPase-activating protein 20
SMED30003770	-2.24631	-4.77355	-0.982802	-1.49648	-0.966899	3.382e-77	1.53959e-208	2.2436e-17	4.56567e-37	6.24212e-13	1
SMED30003771	-0.723364	-0.801793	-0.405782	-0.421554	-0.235815	4.61597e-37	2.73299e-45	7.42489e-13	8.58968e-14	0.000501369	1		PIGG_HUMAN	4e-56	GPI ethanolamine phosphate transferase 2
SMED30003788	0.113303	-0.00385136	-0.261218	-0.363781	-0.598294	0.0883759	0.966693	1.01871e-05	2.11896e-10	5.95873e-20	2		TOM70_HUMAN	3e-61	Mitochondrial import receptor subunit TOM70
SMED30003809	-3.76102	-5.88533	-3.28333	-4.09572	-3.66439	1.88011e-42	4.14857e-84	1.89988e-33	2.56582e-48	6.44253e-29	1	Y	VIT_FENME	3e-36	Vitellogenin
SMED30003899	-0.534006	-0.583887	-0.305093	-0.352412	-0.260689	2.66582e-26	4.80305e-32	3.60023e-09	3.00457e-12	7.83988e-06	3		TEX2_HUMAN	2e-79	Testis-expressed sequence 2 protein
SMED30003905	-0.00123594	-0.34584	-0.130605	-0.438425	-0.37303	0.993122	2.4022e-09	0.0629311	3.18111e-14	1.59237e-08	2		FUBP2_MOUSE	1e-35	Far upstream element-binding protein 2
SMED30003920	0.0871193	-0.120981	-0.203798	-0.642266	-0.784119	0.257008	0.0787218	0.00201647	4.38846e-27	3.84192e-30	2		NBP1B_XENLA	1e-150	Nuclear cap-binding protein subunit 1-B [Xenopus laevis]
SMED30003927	-0.612442	-0.772021	-0.105856	-0.2042	0.063841	7.79117e-10	2.0568e-15	0.433277	0.0623918	0.680235	3		PISD_CRIGR	3e-86	Phosphatidylserine decarboxylase proenzyme
SMED30003929	-1.66387	-2.93389	-1.27382	-1.84791	-1.03132	9.76796e-46	1.03206e-117	6.81961e-28	2.20643e-54	1.00387e-14	1		PDX1_SUBDO	7e-134	Pyridoxal 5'-phosphate synthase subunit SNZERR
SMED30003943	-0.566716	-0.375057	-0.317063	-0.243206	-0.469225	9.79201e-16	1.49783e-07	1.1845e-05	0.00116346	9.95472e-09	3		CBPC5_DANRE	3e-118	Cytosolic carboxypeptidase-like protein 5
SMED30003944	-0.60948	-0.751092	-0.429376	-0.329667	-0.266353	1.87712e-21	1.84188e-31	5.31546e-11	7.75996e-07	0.000520489	3		EFHD1_HUMAN	8e-47	EF-hand domain-containing protein D1
SMED30003947	-1.24968	-1.21399	-0.846623	-1.06418	-1.23366	6.52611e-31	7.06741e-29	3.48811e-15	1.91526e-22	4.47166e-23	1	Y	TRPM7_MOUSE	9e-14	Transient receptor potential cation channel subfamily M member 7
SMED30003960	-0.202225	-0.23101	-0.340706	-0.384698	-0.489971	0.00077488	6.93292e-05	2.9478e-09	1.25824e-11	4.13549e-14	2		ERLN2_HUMAN	5e-155	Erlin-2
SMED30003989	-0.150018	-0.314439	-0.218836	-0.505669	-0.675191	0.0869112	2.601e-05	0.00777422	7.80325e-12	2.55965e-15	2		TRA2B_RAT	1e-16	Transformer-2 protein homolog beta
SMED30004032	-0.823428	-1.36333	-0.385138	-0.653166	-0.528567	5.38716e-19	6.50679e-50	9.25493e-05	1.67802e-12	6.16183e-07	3		RER1_CHICK	6e-49	Protein RER1 [Gallus gallus]
SMED30004043	0.236794	0.129126	0.0546015	-0.462395	-1.5064	0.0829556	0.386663	0.787985	0.000448435	5.87676e-19	2		CKAP5_HUMAN	9e-64	Cytoskeleton-associated protein 5
SMED30004063	-0.48455	-0.578453	-0.391569	-0.462583	-0.259751	4.76077e-17	1.70554e-24	3.21818e-11	9.22115e-16	0.000131357	1		RAB1A_LYMST	5e-113	Ras-related protein Rab-1A [Lymnaea stagnalis]
SMED30004081	-3.90893	-6.35794	-3.02864	-3.85428	-3.60263	5.27622e-74	2.23743e-147	2.66402e-48	3.77058e-72	3.93805e-46	1		TENX_HUMAN	0.0002	Tenascin-X
SMED30004108	-0.235264	-0.200384	-4.13894	-4.94784	-2.33634	0.516887	0.578051	1.03209e-31	8.93062e-36	1.81886e-10	2
SMED30004115	-0.35407	-0.613028	-0.34071	-0.443074	-0.573644	3.42738e-05	2.43902e-14	7.8542e-05	6.49722e-08	3.17735e-10	3		EXOS4_MOUSE	2e-39	Exosome complex component RRP41
SMED30004121	-0.724304	-0.725233	-0.752287	-0.804133	-1.19083	1.719e-10	1.64317e-10	4.91479e-11	2.10102e-12	1.79759e-19	2
SMED30004132	0.157888	0.067934	-0.162688	-0.332456	-0.794254	0.0383486	0.446081	0.0405626	2.51345e-06	2.17111e-22	2		EZ_DROME	9e-70	Histone-lysine N-methyltransferase E(z)
SMED30004136	0.24973	0.0500432	-0.270449	-0.691229	-1.40673	0.0208609	0.729262	0.0164077	9.51228e-12	9.37173e-30	2		DPOLA_XENLA	0	DNA polymerase alpha catalytic subunit
SMED30004164	-1.62535	-1.38467	-0.79499	-0.769586	-0.61199	1.25674e-29	5.93205e-21	1.94832e-09	4.83897e-08	9.21969e-05	3		YR901_MIMIV	1e-23	Putative ankyrin repeat protein R901 [Acanthamoeba polyphaga mimivirus]
SMED30004166	-0.358287	-0.753326	-0.512168	-1.05589	-1.02197	0.0160421	1.93171e-08	0.000302059	3.12792e-14	3.91845e-10	2		DDX17_DROME	4e-169	ATP-dependent RNA helicase p62 [Drosophila melanogaster]
SMED30004184	-0.67395	-0.741483	-0.489862	-0.522779	-0.475739	3.00452e-21	8.40398e-26	8.28695e-12	1.95632e-13	4.4085e-09	3		CSC1_HUMAN	4e-83	Calcium permeable stress-gated cation channel 1
SMED30004206	-0.576344	-0.861836	-0.233539	-0.220793	-0.165199	2.22687e-07	4.37443e-16	0.0689616	0.0710112	0.255052	3		TMT1_YEAS7	1e-07	Trans-aconitate 3-methyltransferase [Saccharomyces cerevisiae YJM789]
SMED30004216	-1.48249	-2.00349	-0.180351	-0.0649971	-0.183307	4.3848e-109	5.49004e-190	0.0207012	0.494473	0.0312634	3		DPYD_HUMAN	0	Dihydropyrimidine dehydrogenase [NADP(+)]
SMED30004250	-0.980354	-1.13987	-0.62088	-0.627728	-0.464069	2.38043e-13	5.71394e-18	2.27158e-06	1.14419e-06	0.00299196	3		TRAF6_MACMU	5e-07	TNF receptor-associated factor 6
SMED30004256	0.228907	-0.251768	-0.533937	-0.843288	-1.26376	0.0698682	0.0378505	1.00424e-05	2.38905e-13	1.36921e-19	2		CH60_CRIGR	0	60 kDa heat shock protein, mitochondrial
SMED30004277	-0.833383	-1.00722	-0.0628961	0.0890398	0.163903	2.17725e-24	1.50816e-35	0.621581	0.414064	0.11969	3		UNC9_CAEEL	1e-58	Innexin unc-9
SMED30004278	-0.386593	-0.508672	-0.40322	-0.227672	-0.194864	1.93492e-14	5.01773e-25	1.79714e-15	1.02835e-05	0.000971146	1		IP3KC_MOUSE	1e-96	Inositol-trisphosphate 3-kinase C
SMED30004288	-2.67305	-5.68774	-2.12186	-2.52876	-1.82394	4.03382e-11	1.90316e-18	8.4764e-09	1.16695e-09	5.77007e-05	3		GTD2B_HUMAN	4e-08	General transcription factor II-I repeat domain-containing protein 2B
SMED30004297	-0.390483	-0.666198	-0.33962	-0.529423	-0.463623	2.10387e-08	1.71517e-23	1.98598e-06	5.66291e-15	1.94874e-09	1		EIF3K_XENTR	5e-60	Eukaryotic translation initiation factor 3 subunit K
SMED30004304	0.0884896	-0.150988	-0.352531	-0.921199	-2.4273	0.626046	0.344287	0.0110186	2.91789e-13	9.98354e-53	2		PCNA_DROME	1e-115	Proliferating cell nuclear antigen
SMED30004315	-0.779021	-0.553037	-0.435034	-0.297408	-0.271639	4.27308e-21	6.13983e-12	1.00413e-07	0.000350953	0.00662758	3		BEST1_HUMAN	4e-72	Bestrophin-1
SMED30004333	-0.957872	-1.55445	-0.265985	-0.492418	-0.578645	5.42404e-13	2.33431e-30	0.0912931	0.000369298	0.000194674	3
SMED30004335	-0.216492	-0.424548	0.241229	0.332019	0.305244	2.91974e-05	1.66573e-18	1.78212e-06	4.03816e-12	1.20485e-08	3		SGSM3_BOVIN	0	Small G protein signaling modulator 3
SMED30004367	-0.0881442	-0.127026	-0.220585	-0.400359	-0.748765	0.405144	0.177442	0.0123619	5.69193e-07	3.12355e-16	2		SRS10_HUMAN	7e-21	Serine/arginine-rich splicing factor 10
SMED30004407	0.52707	0.244829	0.0441948	-0.656573	-1.65722	1.08164e-05	0.0658397	0.838693	2.36201e-07	1.53473e-25	2		DPOD1_BOVIN	0	DNA polymerase delta catalytic subunit [Bos taurus]
SMED30004408	-4.27	-4.9508	-1.68752	-1.72662	-2.0837	2.39794e-90	7.53106e-96	8.30525e-28	6.77796e-27	5.63486e-29	1		NOGG_XENLA	1e-12	Noggin
SMED30004453	-0.593026	-0.783675	-0.427513	-0.631025	-0.402848	4.22601e-13	9.0041e-23	4.44236e-07	6.71208e-15	1.8377e-05	1
SMED30004496	0.144937	-0.300496	-0.306067	-1.16031	-1.93126	0.515723	0.102909	0.131474	2.12317e-11	1.33577e-17	2
SMED30004505	-0.421476	-0.68141	-0.162675	-0.290639	-0.219297	1.60061e-10	1.40309e-26	0.0349958	1.8811e-05	0.00585841	3		PCTL_MOUSE	2e-73	PCTP-like protein
SMED30004531	-0.779457	-0.474423	-0.438168	-0.486208	-0.239921	1.03654e-15	2.19842e-07	6.68591e-06	1.43462e-07	0.0422308	3		BEST3_MOUSE	2e-40	Bestrophin-3
SMED30004532	-0.0730291	-0.20949	-0.427195	-0.540613	-0.862637	0.560265	0.030973	2.02455e-06	6.80131e-10	2.35855e-18	2	Y	YBOX1_RAT	4e-12	Nuclease-sensitive element-binding protein 1
SMED30004557	-1.30133	-1.93188	-0.853365	-1.15775	-0.930351	3.42314e-50	3.85187e-104	1.7055e-22	1.4168e-40	6.65284e-21	1		SPK1_GIRTI	2e-106	Tyrosine-protein kinase SPK-1 [Girardia tigrina]
SMED30004566	-0.999189	-1.27283	-0.717927	-0.810362	-1.24978	1.73987e-15	9.02018e-24	7.51408e-09	5.39139e-11	1.83693e-17	1
SMED30004593	0.288211	0.307993	-0.664474	-1.14694	-2.17747	0.206544	0.15782	0.00132643	1.3002e-08	2.17929e-18	2
SMED30004606	-1.80593	-2.02076	-0.89779	-1.09516	-1.01287	5.47642e-54	4.02766e-65	1.26756e-14	4.33584e-21	2.28395e-14	1	Y	CP2J6_MOUSE	3e-70	Cytochrome P450 2J6
SMED30004648	-0.733313	-0.66909	-0.652396	-0.384214	-0.641572	3.00835e-14	1.27408e-11	6.69444e-12	0.000130206	1.08803e-08	3		DYRK2_MOUSE	2e-171	Dual specificity tyrosine-phosphorylation-regulated kinase 2 [Mus musculus]
SMED30004677	0.025859	-0.107588	-0.240958	-0.415436	-0.710759	0.797032	0.137584	0.000251266	2.02494e-11	1.06635e-23	2		TOP2A_CRIGR	0	DNA topoisomerase 2-alpha
SMED30004679	0.071068	-0.475922	-0.706847	-1.75589	-2.89937	0.802763	0.0143872	0.000379074	1.36781e-17	2.02055e-24	2		PKRI1_DANRE	9e-17	PRKR-interacting protein 1 homolog [Danio rerio]
SMED30004688	-1.75806	-2.81018	-0.956133	-1.25895	-1.48415	9.55303e-20	1.60374e-32	4.89247e-08	5.5367e-11	4.21511e-09	3		CP2G1_RAT	6e-63	Cytochrome P450 2G1
SMED30004699	-2.77652	-2.76597	-0.243655	-0.895305	-0.255048	3.57157e-14	4.14758e-18	0.491938	0.000431571	0.455277	3		SETMR_HUMAN	3e-14	Histone-lysine N-methyltransferase SETMAR
SMED30004747	-1.05024	-1.25752	-0.587218	-0.865459	-0.583607	1.81964e-53	3.0517e-75	1.19813e-17	4.78736e-37	8.26671e-14	1	Y	CP3A9_RAT	7e-104	Cytochrome P450 3A9
SMED30004785	-0.567171	-0.659368	0.118325	0.114576	0.487131	2.79338e-17	1.10443e-23	0.150738	0.14589	3.16056e-12	3		OPLA_HUMAN	0	5-oxoprolinase
SMED30004809	-0.51751	-0.695962	-0.481874	-0.504495	-0.33351	4.4125e-08	5.58999e-14	4.41275e-07	8.68616e-08	0.0024288	3		TRAF5_MOUSE	7e-16	TNF receptor-associated factor 5 [Mus musculus]
SMED30004814	-1.0635	-1.74589	-0.88161	-1.36702	-1.10104	1.2821e-15	5.54826e-35	2.79737e-11	3.05096e-23	3.89552e-12	1
SMED30004891	-2.50786	-4.01333	-1.58994	-1.95814	-2.57968	9.19734e-68	1.56178e-112	1.26451e-33	5.87767e-44	1.40465e-50	1		NAGAB_CHICK	5e-62	Alpha-N-acetylgalactosaminidase
SMED30004939	-1.25253	-1.81474	-0.559507	-0.865852	-0.568536	3.38095e-47	3.37624e-94	4.5158e-10	3.51676e-23	1.79563e-08	1
SMED30004948	-0.376052	-0.52932	-0.093904	-0.266221	-0.00287397	2.46608e-10	6.46488e-20	0.226109	1.29416e-05	0.980113	3		PCP_MOUSE	9e-120	Lysosomal Pro-X carboxypeptidase
SMED30004988	0.398239	0.293491	-0.114027	-0.777336	-1.79025	0.000676156	0.014349	0.502464	1.89933e-10	1.05578e-29	2		KIF23_MOUSE	3e-83	Kinesin-like protein KIF23 [Mus musculus]
SMED30005028	-1.03834	-1.30954	-0.661951	-0.945932	-0.573553	1.19782e-16	4.73495e-27	6.20722e-08	1.25648e-15	2.98283e-05	1		ANR28_MOUSE	6e-29	Serine/threonine-protein phosphatase 6 regulatory ankyrin repeat subunit A
SMED30005048	-0.178945	-0.601007	-0.274535	-0.644284	-0.621405	0.0313983	9.50954e-18	0.000439242	8.35145e-20	1.25304e-14	1
SMED30005062	-0.579179	-0.812987	0.357592	0.344323	0.296251	1.97061e-07	1.05275e-14	0.00157296	0.00144447	0.0204891	3		KYNU_RAT	1e-136	Kynureninase
SMED30005131	-2.63734	-2.63208	-1.36078	-1.28217	-1.50872	1.2768e-27	3.65907e-30	2.20025e-11	5.83586e-11	3.32548e-09	3		HSP7C_HUMAN	0	Heat shock cognate 71 kDa protein
SMED30005161	-1.40923	-2.06685	-1.05998	-1.47514	-1.3969	1.17266e-29	1.77984e-60	5.52221e-17	4.66355e-32	4.02001e-22	1		FAXC_RAT	3e-37	Failed axon connections homolog [Rattus norvegicus]
SMED30005168	-2.47559	-2.43406	-0.832262	-0.859518	-0.396282	2.57949e-111	3.96232e-89	3.4802e-20	1.70492e-17	0.00210479	1		FUCO2_RAT	7e-177	Plasma alpha-L-fucosidase
SMED30005171	-0.0736594	-0.237605	-0.281143	-0.564546	-0.898776	0.421182	0.000709098	6.9098e-05	1.71603e-17	7.98015e-33	2
SMED30005190	-0.301269	-0.358563	-0.452088	-0.597621	-0.683957	0.000145377	3.01876e-06	4.3531e-09	1.70761e-15	8.87031e-16	2		R15A1_ARATH	3e-72	40S ribosomal protein S15a-1 [Arabidopsis thaliana]
SMED30005194	-0.306676	-0.467377	-0.414088	-0.558347	-0.864441	0.00241986	2.98359e-07	2.2626e-05	1.22713e-09	2.46379e-16	2		NLE1_HUMAN	2e-138	Notchless protein homolog 1 [Homo sapiens]
SMED30005206	0.238436	0.112149	-0.0208633	-0.285321	-0.576902	0.000588239	0.155522	0.864548	3.68977e-05	2.35397e-14	2		SRS1B_DANRE	1e-47	Serine/arginine-rich splicing factor 1B
SMED30005229	-0.0710275	0.0557353	-2.161	-2.49903	-2.951	0.837942	0.86237	5.88709e-15	3.30936e-17	2.31951e-12	2		PAO_MAIZE	1e-17	Polyamine oxidase
SMED30005246	0.252541	0.0582906	-0.240647	-0.949852	-2.71086	0.0543162	0.730695	0.0864171	9.37564e-16	6.95281e-63	2		CCNB2_BOVIN	2e-33	G2/mitotic-specific cyclin-B2 [Bos taurus]
SMED30005265	-1.17787	-2.06437	-0.644304	-0.815026	-0.990081	1.48664e-06	5.63093e-15	0.0097967	0.000783381	0.000618632	3
SMED30005278	-0.561227	-0.729641	-0.186758	-0.221184	0.00225013	1.66539e-19	2.06377e-31	0.00727451	0.000991273	0.985592	3		MANBA_MOUSE	8e-124	Beta-mannosidase
SMED30005285	-0.863024	-1.03362	0.135785	0.0212031	-0.478405	1.20645e-16	2.44882e-25	0.288649	0.894586	1.85738e-05	3		FAIM1_BOVIN	2e-43	Fas apoptotic inhibitory molecule 1 [Bos taurus]
SMED30005346	-0.455461	-0.625682	-0.365245	-0.510224	-0.428495	3.40451e-20	1.12178e-37	3.84575e-13	3.69977e-25	2.34032e-14	1		UBP4_MOUSE	1e-142	Ubiquitin carboxyl-terminal hydrolase 4
SMED30005357	-1.71099	-1.85157	-2.28892	-2.55887	-3.11886	3.12581e-75	2.55322e-86	4.91343e-126	1.87054e-149	1.12133e-144	1	Y
SMED30005428	-0.147077	-0.251261	-0.362147	-0.419679	-0.703536	0.0908223	0.00120301	1.84227e-06	2.16213e-08	7.86839e-17	2		SARNP_MOUSE	2e-15	SAP domain-containing ribonucleoprotein
SMED30005429	-1.14172	-0.824807	-2.40939	-2.27192	-2.43408	7.47687e-25	5.80334e-13	1.13437e-88	1.83816e-71	4.95438e-58	1
SMED30005444	-0.111197	-0.401149	-0.312841	-0.531485	-0.453506	0.167665	3.60508e-10	3.7999e-06	8.16121e-17	5.42908e-10	2		NCLN_DANRE	1e-115	Nicalin-1
SMED30005489	-0.681913	-0.567648	-0.362364	-0.432051	-0.109776	1.61464e-23	2.74561e-17	1.61007e-07	2.07455e-10	0.240849	3		AP3M1_HUMAN	2e-124	AP-3 complex subunit mu-1
SMED30005491	-0.393443	-0.498029	-2.21023	-3.11336	-2.94609	0.00843387	0.000896884	5.94906e-41	1.07953e-53	1.64519e-34	2
SMED30005508	-2.24993	-2.65092	-2.04264	-2.29	-2.19927	1.74105e-104	5.38194e-139	4.43481e-88	2.20436e-107	2.73681e-73	1	Y	ACSL5_MOUSE	1e-167	Long-chain-fatty-acid--CoA ligase 5
SMED30005569	-0.157998	-0.498488	-0.303428	-0.654063	-0.839719	0.141181	4.92253e-08	0.00146526	1.61477e-12	8.86025e-15	2		MD36B_ARATH	4e-85	Probable mediator of RNA polymerase II transcription subunit 36b
SMED30005578	-2.30227	-2.79802	-1.45706	-1.28294	-1.35978	9.97859e-180	5.90003e-218	2.91871e-89	1.28421e-65	9.82567e-54	1		NAC1_HUMAN	0	Sodium/calcium exchanger 1
SMED30005603	-3.34847	-5.9401	-1.21516	-1.36297	-1.44763	2.33448e-81	2.19524e-124	3.17886e-19	1.36763e-22	5.42047e-20	1
SMED30005629	-2.00633	-2.77261	-0.678161	-0.841419	-0.594082	9.56941e-84	2.23959e-142	3.25372e-11	7.81698e-17	3.1131e-07	1		CDKL3_RAT	6e-18	Cyclin-dependent kinase-like 3
SMED30005631	-0.603659	-0.827123	-0.375158	-0.553127	-0.470994	2.21517e-18	2.41372e-34	1.74966e-07	8.98464e-16	2.02906e-09	1
SMED30005635	-1.89919	-4.54553	-0.850277	-1.11641	-1.64232	7.32783e-33	6.09833e-83	2.9378e-08	8.76676e-12	2.26527e-17	1		CP2F2_RAT	4e-53	Cytochrome P450 2F2
SMED30005644	-1.693	-2.00932	-2.34287	-2.45253	-2.83802	3.01194e-59	1.19319e-79	7.87432e-105	5.48901e-111	3.68799e-99	1	Y
SMED30005652	-0.23065	-0.597876	0.214021	0.164671	0.18834	0.00193407	4.61312e-19	0.00499942	0.0335616	0.0247842	3		ATTY_MOUSE	5e-146	Tyrosine aminotransferase
SMED30005661	-0.661964	-0.699419	-0.417913	-0.44846	-0.201189	1.30724e-23	1.94549e-26	1.04693e-09	3.04031e-11	0.0157313	3		RAB7A_CANFA	7e-115	Ras-related protein Rab-7a [Canis lupus familiaris]
SMED30005665	-0.750791	-0.900747	-0.534934	-0.552959	-0.277027	4.03458e-26	5.65852e-38	9.4788e-14	4.51496e-15	0.000963302	1
SMED30005684	-0.77891	-0.706924	-0.323742	-0.448135	-0.81841	7.79517e-15	9.3365e-13	0.00178894	7.75749e-06	2.9478e-12	3		ELOV4_MOUSE	1e-90	Elongation of very long chain fatty acids protein 4
SMED30005712	-0.425776	-0.548407	-0.0655513	-0.0546961	-0.0452225	1.01716e-09	1.17575e-16	0.499344	0.551227	0.677765	3
SMED30005738	-0.339699	-0.399224	-0.73681	-0.662413	-0.544477	4.40109e-07	2.40858e-09	9.57178e-29	1.22469e-22	3.68629e-13	2		CIZ1_HUMAN	5e-05	Cip1-interacting zinc finger protein
SMED30005740	-2.03347	-2.16489	-2.5449	-2.80076	-3.06875	6.74235e-70	3.49788e-77	8.27038e-103	2.2064e-117	3.79148e-96	1	Y
SMED30005748	-0.695995	-1.04886	-0.105705	-0.276448	-0.0401813	2.64952e-40	9.55534e-91	0.108273	2.62948e-07	0.642293	3		HNF4A_XENLA	3e-108	Hepatocyte nuclear factor 4-alpha
SMED30005772	-0.289641	-0.453607	-0.382111	-0.343529	-0.534854	9.62628e-08	3.70806e-18	1.19817e-12	1.38999e-10	2.83662e-19	1		VMA5A_HUMAN	6e-76	von Willebrand factor A domain-containing protein 5A
SMED30005802	-0.319467	-0.437745	-0.558262	-0.575248	-0.94643	3.70852e-05	4.06834e-09	9.81887e-14	1.26822e-14	1.23581e-28	2	Y	NUCL_XENLA	8e-08	Nucleolin
SMED30005823	0.52065	0.392098	-0.142484	-0.744462	-1.37574	1.21213e-14	6.76456e-09	0.105219	4.50111e-25	8.25666e-55	2		PKN1_RAT	3e-86	Serine/threonine-protein kinase N1
SMED30005831	-0.529359	-0.949282	-0.399255	-0.484221	-0.555537	1.21966e-05	1.03896e-16	0.00137307	2.97512e-05	2.73447e-05	3		RNLS_RAT	3e-35	Renalase
SMED30005835	-0.975069	-0.487223	-3.97791	-4.36458	-1.72701	4.94577e-08	0.010947	3.81403e-84	5.07148e-91	4.80022e-16	2
SMED30005838	-2.42126	-3.08425	-3.01729	-3.30821	-4.06122	4.04957e-51	3.29575e-78	1.05971e-74	2.52655e-87	9.15413e-86	1
SMED30005863	-2.64939	-3.04472	-1.31609	-1.37476	-1.2704	1.32367e-95	2.15574e-122	8.40532e-26	2.82217e-28	1.00419e-18	1		NATT4_THANI	0.0001	Natterin-4
SMED30005864	-0.863882	-1.31994	-0.211179	-0.00204805	-0.75757	5.28648e-09	4.21037e-18	0.22837	0.992913	1.9241e-06	3
SMED30005872	-3.53136	-5.11134	-3.54121	-4.76774	-4.51313	2.18196e-49	6.04034e-86	4.01494e-49	4.03813e-77	4.06514e-50	1		NETR_SAGLB	2e-89	Neurotrypsin
SMED30005873	0.0663151	-0.352441	-0.25488	-0.51892	-0.834011	0.624901	0.000150329	0.0153541	1.88525e-08	7.62062e-15	2	Y	TBL3_MOUSE	2e-72	Transducin beta-like protein 3 [Mus musculus]
SMED30005912	-0.698084	-0.697044	0.0348306	0.0652585	0.48282	2.29544e-15	1.04964e-16	0.801789	0.559433	2.9681e-09	3		4CL1_PETCR	1e-35	4-coumarate--CoA ligase 1
SMED30005932	0.250672	0.0149047	-0.0946751	-0.397098	-0.591371	4.38243e-05	0.871698	0.225271	1.89364e-11	6.43405e-19	2		TDRD1_DANRE	3e-09	Tudor domain-containing protein 1 [Danio rerio]
SMED30005941	-1.37051	-2.27223	-1.37742	-1.7718	-1.95012	5.24107e-32	1.10671e-68	1.17344e-32	7.48718e-47	1.31043e-40	1		CP46A_HUMAN	2e-66	Cholesterol 24-hydroxylase
SMED30005974	-0.454458	-0.231936	-0.384057	-0.466255	-0.843194	2.93527e-06	0.0235496	0.000101238	1.22098e-06	3.59902e-15	2
SMED30005988	-0.174109	-0.240121	-0.31598	-0.381747	-0.614336	0.0268106	0.000983144	1.30109e-05	5.21239e-08	2.14956e-15	2		RL24_SCHJA	3e-39	60S ribosomal protein L24 [Schistosoma japonicum]
SMED30006057	-0.797909	-0.824015	-1.31296	-0.904434	-1.14014	8.13611e-07	1.66721e-06	2.99778e-15	2.11559e-07	6.66693e-09	2
SMED30006060	0.248205	-0.16263	-0.43748	-1.21056	-2.5169	0.0946161	0.306138	0.00259	1.81473e-18	4.79264e-39	2		KIF4B_HUMAN	3e-117	Chromosome-associated kinesin KIF4B
SMED30006065	0.289021	0.335746	0.0324983	-0.500573	-1.92866	0.0654962	0.0219406	0.89887	0.000939337	1.06236e-23	2	Y	ASPM_MOUSE	0	Abnormal spindle-like microcephaly-associated protein homolog
SMED30006083	-2.25572	-3.21612	-3.25072	-3.60102	-4.17139	1.39538e-53	5.86592e-81	5.25221e-90	2.48561e-91	2.73681e-73	1	Y
SMED30006117	-1.15467	-1.37615	-0.404357	-0.397284	-0.565489	9.2092e-32	1.0491e-42	6.49346e-05	8.67485e-05	6.5173e-07	3		PTN1_CHICK	4e-50	Tyrosine-protein phosphatase non-receptor type 1
SMED30006163	0.222706	0.188608	-0.382155	-1.04896	-2.38967	0.178846	0.273976	0.0156722	8.84652e-12	2.60077e-31	2
SMED30006209	0.101277	-0.167839	-0.301422	-0.673445	-0.965028	0.456683	0.163187	0.00726168	1.23711e-10	2.2427e-15	2		PABP2_DROME	4e-42	Polyadenylate-binding protein 2
SMED30006211	-0.634298	-0.828286	-0.231988	-0.28159	-0.243063	6.36278e-09	1.87697e-14	0.0725294	0.0199793	0.0881886	3		TRYT_PIG	2e-37	Tryptase
SMED30006216	-0.215781	-0.339378	-0.25511	-0.457905	-0.598009	0.00151933	9.1996e-08	0.000156079	3.51293e-13	2.42366e-17	2		RS8_SPOFR	6e-85	40S ribosomal protein S8 [Spodoptera frugiperda]
SMED30006241	-0.720093	-0.36018	-0.314946	-0.329709	-0.091981	2.62189e-15	0.000110397	0.00088053	0.000533723	0.500212	3		SRAC1_DANRE	6e-32	Protein SERAC1
SMED30006247	-1.48749	-2.07917	-0.419785	-0.753495	-1.02202	4.00316e-86	2.52747e-153	2.68581e-08	1.06888e-24	1.63132e-33	1
SMED30006281	-0.747008	-1.16186	0.0127673	0.0559378	0.0838101	1.62173e-37	1.33963e-88	0.909889	0.500999	0.320065	3		GYG1_CAEEL	2e-52	Glycogenin-1
SMED30006337	-0.727395	-1.7136	0.0346494	0.0928757	0.647426	0.000604091	3.79542e-14	0.920232	0.751316	0.00251943	3		GATM_XENLA	7e-124	Glycine amidinotransferase, mitochondrial
SMED30006342	-0.0112209	0.00482732	-0.315091	-0.332499	-0.541356	0.910521	0.96051	8.65317e-08	1.20635e-08	8.73816e-17	2		NU133_MOUSE	1e-23	Nuclear pore complex protein Nup133
SMED30006352	-1.83157	-2.6026	-0.679421	-0.840422	-0.787413	1.29287e-51	5.36018e-87	2.63065e-09	1.60813e-13	2.10885e-09	3
SMED30006378	-0.447314	-0.585103	-0.395685	-0.283279	-0.47858	1.93268e-14	1.2052e-24	2.68358e-11	2.10915e-06	2.27149e-13	3		SLMO2_RAT	2e-30	Protein slowmo homolog 2 [Rattus norvegicus]
SMED30006386	-0.988826	-1.67373	-0.0932829	-0.331881	0.0992064	4.2962e-37	1.93281e-96	0.388767	3.36967e-05	0.376297	3		CLN5_MOUSE	1e-86	Ceroid-lipofuscinosis neuronal protein 5 homolog
SMED30006388	0.103559	-0.10575	-0.5066	-0.723577	-1.01027	0.381347	0.360094	3.25995e-08	1.07066e-15	1.49433e-22	2		CYPH_SCHPO	2e-74	Peptidyl-prolyl cis-trans isomerase
SMED30006456	0.531482	0.454605	-0.0686076	-0.804787	-2.24482	9.91815e-07	1.73935e-05	0.707466	2.2238e-12	2.28079e-46	2		CLSPN_HUMAN	1e-12	Claspin
SMED30006464	0.553596	-0.0693937	-0.602072	-0.704559	-0.587114	6.28587e-13	0.533636	6.23064e-12	1.10203e-16	1.09979e-08	2		TCF15_CHICK	2e-17	Transcription factor 15
SMED30006465	-2.85173	-3.36941	-0.177352	-0.928181	-0.183521	1.47954e-35	2.36022e-43	0.401392	6.08355e-08	0.442533	3
SMED30006473	-1.82413	-2.40516	-1.78609	-1.68242	-1.95365	2.84197e-64	1.21017e-89	5.25757e-65	1.14462e-53	3.91302e-45	1		YHJX_ECOLI	5e-11	Uncharacterized MFS-type transporter YhjX [Escherichia coli K-12]
SMED30006480	-3.89227	-4.80187	-1.08934	-1.91634	-2.77985	2.05487e-150	2.35509e-198	9.01563e-16	2.67396e-45	5.84123e-63	1
SMED30006495	-2.03677	-4.25239	-0.851549	-1.32611	-0.659378	3.01093e-09	2.18355e-23	0.00507923	2.20847e-06	0.0361474	3		TRAF5_HUMAN	6e-09	TNF receptor-associated factor 5
SMED30006497	-0.706053	-0.590344	-0.498718	-0.450247	-0.323621	9.38898e-36	9.81765e-25	1.01704e-18	8.94893e-15	1.56874e-06	1		ATG7_HUMAN	2e-165	Ubiquitin-like modifier-activating enzyme ATG7
SMED30006511	-3.44562	-4.63069	-2.43299	-3.17616	-2.67532	3.86923e-17	1.43425e-18	2.87045e-12	1.44542e-13	3.06518e-09	3
SMED30006516	-3.26316	-6.6311	-0.950494	-1.52673	-0.869017	3.99771e-85	1.26386e-175	3.83488e-10	5.54489e-24	4.91761e-07	1		S47A1_PONAB	2e-80	Multidrug and toxin extrusion protein 1
SMED30006533	0.157483	-0.634833	0.00716212	-0.902637	-1.40239	0.245535	7.82348e-11	0.975211	5.33187e-20	6.67574e-40	2		ARF_DUGJA	6e-66	ADP-ribosylation factor [Dugesia japonica]
SMED30006576	0.132948	0.0482636	-0.169843	-0.370865	-0.532094	0.0577511	0.567327	0.0134394	1.18511e-09	1.12323e-14	2		API5B_XENLA	3e-65	Apoptosis inhibitor 5-B
SMED30006591	0.0728601	-0.229791	-0.267283	-0.585291	-0.670651	0.415402	0.000817377	0.000144524	4.32082e-19	1.198e-18	2		ZMYM3_MOUSE	7e-36	Zinc finger MYM-type protein 3
SMED30006606	-1.07809	-1.44024	-0.0682839	-0.173147	0.112154	1.45903e-54	1.81338e-94	0.518949	0.0309729	0.253896	3		MA2B1_BOVIN	0	Lysosomal alpha-mannosidase
SMED30006638	0.123753	-0.149518	-0.262719	-0.42489	-0.595298	0.0472117	0.011066	3.12912e-06	2.59652e-15	1.07592e-22	2		EFTU_MOUSE	1e-156	Elongation factor Tu, mitochondrial
SMED30006659	-0.195724	-0.506407	-0.239377	-0.343066	-0.33483	0.00152148	1.22285e-19	8.13106e-05	2.37945e-09	2.69256e-07	3		S17A9_HUMAN	7e-89	Solute carrier family 17 member 9 [Homo sapiens]
SMED30006674	-1.28573	-0.914124	-0.967322	-0.628339	-1.63233	5.45543e-14	2.11127e-07	4.09839e-09	0.000385672	3.95944e-14	1	Y
SMED30006689	-1.10709	-1.47513	-0.572887	-0.804181	-0.349674	4.80669e-41	1.94003e-69	1.05586e-11	4.02311e-22	0.000423416	1		LRRK2_MOUSE	2e-130	Leucine-rich repeat serine/threonine-protein kinase 2 [Mus musculus]
SMED30006734	-1.78944	-1.65026	-0.84453	-0.826913	-0.641763	1.2894e-14	5.04888e-13	8.44292e-05	0.000136954	0.00758069	3
SMED30006788	0.265517	0.180199	-0.341071	-0.860396	-1.93981	0.11771	0.326502	0.0487361	6.13679e-08	4.95235e-21	2
SMED30006795	-0.518318	-0.829227	-0.643475	-0.78327	-0.865781	9.81871e-09	3.11373e-21	8.2692e-13	7.04606e-19	1.83011e-17	1		ANM3_HUMAN	4e-100	Protein arginine N-methyltransferase 3
SMED30006798	-3.26836	-5.61363	-0.35351	-0.789733	-0.134539	1.38948e-63	1.70336e-113	0.0883449	9.55823e-06	0.628019	3
SMED30006799	-0.358198	-0.523663	-0.291973	-0.319278	-0.262113	1.56416e-08	1.37025e-18	4.423e-06	1.15099e-07	0.000208197	3		DHX8_HUMAN	0	ATP-dependent RNA helicase DHX8
SMED30006834	-0.147406	-0.335733	-0.240355	-0.324539	-0.677225	0.0928844	8.61098e-06	0.00267991	2.10872e-05	1.40412e-15	2
SMED30006900	-1.49408	-1.83171	0.143507	0.448443	0.504681	4.22657e-21	1.08526e-30	0.485588	0.00204586	0.00147692	3
SMED30006906	-0.439862	-0.375258	-0.791272	-0.832692	-0.800321	2.21088e-10	4.5618e-08	7.48791e-31	2.55818e-34	9.67626e-24	2		ANO7_MOUSE	0	Anoctamin-7
SMED30006979	0.135804	-0.0859353	-0.358698	-1.02897	-2.55335	0.423602	0.630609	0.0115872	6.12711e-16	1.12803e-54	2		MCM2_XENLA	0	DNA replication licensing factor mcm2
SMED30007007	-0.293104	-0.44773	-0.231569	-0.337762	-0.0557087	1.24099e-07	6.4409e-17	4.126e-05	5.07687e-10	0.505629	3		TESK2_MOUSE	5e-52	Dual specificity testis-specific protein kinase 2
SMED30007028	-0.156693	0.216592	-1.58426	-1.45407	-2.39982	0.514961	0.325799	1.37765e-16	1.04802e-12	6.60793e-20	2		POL4_DROME	5e-27	Retrovirus-related Pol polyprotein from transposon 412
SMED30007040	-1.38474	-1.15851	-2.24816	-2.35621	-2.70492	2.6769e-10	4.57452e-07	4.51904e-21	1.12536e-18	8.92576e-20	2
SMED30007047	-0.807722	-1.05417	-0.150815	-0.16175	0.0624942	8.89015e-15	1.75081e-24	0.267948	0.203048	0.711479	3
SMED30007060	-0.569479	-0.61351	-0.401128	-0.343646	-0.270152	1.52685e-22	2.15263e-26	1.48529e-11	7.01398e-09	8.11192e-05	3		SF3_HELAN	4e-12	Pollen-specific protein SF3 [Helianthus annuus]
SMED30007143	-0.326514	-0.729832	-0.45434	-0.703104	-0.72912	9.32275e-06	4.55659e-26	3.50482e-10	6.88324e-24	4.03851e-20	1		NOG2_MOUSE	1e-125	Nucleolar GTP-binding protein 2 [Mus musculus]
SMED30007156	-0.915005	-1.05695	-0.290421	-0.222609	-0.0737465	1.50874e-25	3.78504e-33	0.00226869	0.0232159	0.594398	3		DHB14_BOVIN	4e-55	17-beta-hydroxysteroid dehydrogenase 14
SMED30007161	-1.00558	-1.5514	-0.366933	-0.592445	-0.870659	5.95207e-37	2.424e-84	1.13046e-05	7.38497e-14	3.64376e-22	1
SMED30007257	-0.793801	-1.19867	-0.221319	-0.34009	-0.262268	8.01754e-12	4.83387e-26	0.095153	0.0030921	0.0526702	3
SMED30007277	-0.787856	-1.19326	1.25713	1.37639	1.17687	3.80274e-21	4.35681e-47	1.80739e-60	7.45216e-74	2.59602e-46	3		T23O_DROAN	3e-117	Tryptophan 2,3-dioxygenase
SMED30007287	-0.24889	-0.550077	-0.242159	-0.377012	-0.395065	0.00015392	1.32478e-19	0.000308252	1.70599e-09	2.00417e-08	3		NOG1_HUMAN	6e-177	Nucleolar GTP-binding protein 1
SMED30007290	-0.719661	-1.15513	0.0396885	-0.00959701	0.112272	1.33797e-27	1.02533e-66	0.715283	0.934275	0.215494	3		GATA4_XENLA	1e-32	Transcription factor GATA-4
SMED30007294	-1.22442	-1.74006	0.728188	0.741766	0.457817	1.62542e-29	5.26753e-55	1.73914e-14	1.71656e-15	1.99149e-05	3		SC5A8_MOUSE	1e-124	Sodium-coupled monocarboxylate transporter 1
SMED30007305	-1.91156	-3.53123	-0.938529	-1.46594	-1.21067	3.64838e-60	8.84851e-174	1.72302e-15	2.1874e-36	1.70405e-19	1
SMED30007314	-2.07189	-3.09316	-0.816666	-1.32239	-1.076	2.47556e-45	1.23391e-79	1.98865e-09	7.9002e-22	4.93999e-12	1		STRA6_BOVIN	3e-10	Stimulated by retinoic acid gene 6 protein homolog [Bos taurus]
SMED30007343	0.132272	-0.0302381	-0.156376	-0.390894	-0.731934	0.0604243	0.738859	0.0259065	1.41227e-10	2.24558e-26	2		TDRD1_ORYLA	2e-05	Tudor domain-containing protein 1 [Oryzias latipes]
SMED30007372	-1.53638	-2.2386	-0.51208	-0.863715	-0.619127	1.26287e-34	4.88416e-58	3.23303e-06	3.24059e-14	7.24675e-07	1		MYCT_MOUSE	5e-62	Proton myo-inositol cotransporter
SMED30007383	-0.992538	-1.21092	-0.530078	-0.643605	-0.607323	3.71594e-30	6.26299e-44	9.81049e-10	5.01698e-14	7.72516e-10	1
SMED30007396	-0.467578	-0.54396	-0.982933	-1.05573	-1.1305	3.96912e-13	2.27383e-17	2.59089e-52	5.21849e-58	1.89944e-47	1		CLYBL_MOUSE	6e-50	Citrate lyase subunit beta-like protein, mitochondrial
SMED30007406	0.457563	-0.108315	-0.484829	-1.37118	-2.94557	0.000196374	0.499032	9.51751e-05	1.58262e-32	1.64601e-94	2		PIWI1_SCHMD	0	Piwi-like protein 1
SMED30007442	-2.54366	-2.77187	0.0840533	-0.028417	-0.11741	5.42352e-56	6.27039e-65	0.676167	0.894766	0.550801	3
SMED30007460	-2.33714	-6.22044	-0.904127	-2.33819	-1.34722	2.9307e-09	7.86608e-26	0.00920587	1.40034e-11	0.000339668	3
SMED30007465	-0.143618	-0.488841	-0.528534	-0.821025	-1.1298	0.166928	4.87372e-09	7.73992e-10	7.51776e-23	7.73841e-32	2		CCD58_DANRE	7e-29	Coiled-coil domain-containing protein 58 [Danio rerio]
SMED30007496	-0.521101	-0.662866	-0.271162	-0.354915	-0.288006	4.62781e-12	1.91462e-19	0.000883023	3.82724e-06	0.00119792	3		FREM1_HUMAN	1e-88	FRAS1-related extracellular matrix protein 1
SMED30007516	-0.110148	-0.450375	-0.936223	-1.72686	-2.77676	0.692664	0.027119	4.18886e-06	8.22998e-16	5.70481e-20	2
SMED30007534	-0.74685	-0.844898	-0.79528	-0.966933	-1.44784	6.36523e-09	1.54936e-10	5.77957e-10	5.73491e-13	2.35387e-19	2	Y	LLPH_MOUSE	1e-05	Protein LLP homolog
SMED30007550	-1.9089	-5.27444	-0.858528	-1.39062	-1.45697	4.81063e-63	5.24649e-190	2.95104e-16	5.20537e-36	2.64007e-26	1
SMED30007553	-2.15477	-3.17786	-1.41203	-1.38774	-1.11322	6.80893e-20	3.64658e-31	1.00627e-10	4.82475e-10	1.11172e-06	3
SMED30007563	-0.651701	-0.594387	-0.17267	0.084149	0.154918	1.63485e-15	3.89937e-13	0.074736	0.444609	0.151383	3		ST1B1_CHICK	3e-46	Sulfotransferase family cytosolic 1B member 1
SMED30007566	-0.512544	-0.281331	-0.670464	-0.332551	-0.318863	5.62674e-15	2.2139e-05	8.9372e-25	5.3276e-07	3.93561e-05	1		CA2D3_MOUSE	5e-53	Voltage-dependent calcium channel subunit alpha-2/delta-3
SMED30007567	-0.373034	-0.399117	-0.380939	-0.5186	-0.427147	1.095e-11	1.79092e-13	5.10592e-12	1.52918e-21	4.84956e-12	2		LYST_HUMAN	1e-105	Lysosomal-trafficking regulator
SMED30007604	-0.944327	-0.509798	0.352942	0.83904	1.1541	5.1661e-38	5.31012e-12	2.32629e-06	1.82035e-33	8.54014e-53	3
SMED30007621	-1.84082	-2.48847	-0.932785	-1.20805	-0.90004	3.67631e-58	7.64602e-94	3.27427e-19	9.27261e-31	8.72424e-14	1
SMED30007633	-1.47191	-1.89653	-0.456069	-0.544682	-0.309013	2.37078e-58	8.54118e-89	1.08285e-07	1.34616e-10	0.00217043	3
SMED30007667	-1.16398	-1.61032	-0.633785	-0.770764	-0.508556	1.63161e-11	7.65488e-22	0.000159591	7.70319e-07	0.00739261	3
SMED30007672	-0.817294	-0.604935	-0.989394	-0.964372	-0.774459	9.42647e-12	6.4088e-07	2.03577e-16	7.74009e-16	1.83394e-08	2
SMED30007674	-0.168856	-0.503021	-0.440037	-0.537376	-0.6603	0.017821	1.02269e-15	7.56574e-12	2.02318e-17	8.65582e-20	1		GPTC4_RAT	4e-12	G patch domain-containing protein 4 [Rattus norvegicus]
SMED30007699	-0.264389	-0.422659	-0.338874	-0.596164	-0.530557	3.15634e-05	2.16558e-12	4.59333e-08	1.47885e-22	1.50089e-13	2		KLD8A_HUMAN	6e-43	Kelch domain-containing protein 8A
SMED30007704	-0.805831	-1.52749	-0.632697	-0.963904	-0.798052	3.74153e-17	1.41933e-58	1.35793e-10	6.35987e-24	3.5662e-13	1		ACTC_BIOTE	0	Actin, cytoplasmic
SMED30007712	-0.0861458	-0.375706	-0.15343	-0.529588	-0.312011	0.317167	3.28031e-09	0.0462684	6.02322e-17	3.3134e-05	2		ERCC6_HUMAN	0	DNA excision repair protein ERCC-6
SMED30007718	-0.38615	-0.511703	-0.290568	-0.469288	-0.872685	4.18816e-08	8.33143e-14	7.07647e-05	1.48203e-11	8.28055e-28	1		FLOT1_DROME	7e-144	Flotillin-1 [Drosophila melanogaster]
SMED30007723	-3.75354	-6.80343	-1.51867	-2.07827	-1.58633	8.82692e-20	2.09985e-27	7.74538e-06	1.17316e-08	8.25293e-05	3
SMED30007824	-0.447784	-0.521785	-0.230599	-0.307445	-0.188318	1.21998e-16	1.0796e-22	6.35514e-05	2.33006e-08	0.00414932	3		WASH7_HUMAN	0	WASH complex subunit 7
SMED30007841	-1.90147	-1.87439	-0.932288	-0.796028	-0.818431	1.2084e-44	8.85228e-42	1.18286e-13	6.46452e-10	3.22104e-08	3		VDR_XENLA	1e-33	Vitamin D3 receptor
SMED30007862	-0.351224	-0.665583	-0.268274	-0.320943	-0.336133	2.32884e-09	1.64685e-31	8.47312e-06	3.33658e-08	3.51243e-07	3		Y1135_THETN	6e-20	Probable transcriptional regulatory protein TTE1135 [Caldanaerobacter subterraneus subsp. tengcongensis MB4]
SMED30007877	-1.4454	-1.54836	-0.843593	-0.873773	-0.875581	1.35329e-37	1.46077e-41	9.242e-14	1.91226e-14	1.56758e-11	1
SMED30007903	-1.40309	-1.23652	0.402922	0.31255	0.0207424	1.26519e-28	5.96936e-24	0.000478262	0.00842752	0.924269	3		SC6A6_RAT	2e-176	Sodium- and chloride-dependent taurine transporter
SMED30007927	0.0927279	-0.232994	-0.478365	-1.03089	-1.46023	0.350343	0.00339808	4.40251e-10	4.76919e-43	4.02704e-57	2
SMED30007929	0.313929	-0.243296	0.0369433	-0.678202	-1.45408	0.00296067	0.0265651	0.83657	3.80939e-11	4.5277e-30	2		MRE11_RAT	1e-161	Double-strand break repair protein MRE11A
SMED30008015	-0.175331	-0.150042	-0.464911	-0.584789	-1.07151	0.13482	0.208227	4.54169e-06	1.08473e-08	4.2309e-20	2		TPC_MACFA	4e-59	Mitochondrial thiamine pyrophosphate carrier
SMED30008017	-3.4573	-5.41464	-1.84453	-2.42464	-2.15527	4.83522e-57	5.6753e-106	4.18775e-19	3.26494e-31	5.80412e-19	1		Y3950_MYCS2	5e-06	Universal stress protein MSMEG_3950/MSMEI_3859
SMED30008034	-0.829058	-0.595836	-0.0269751	0.125712	0.22629	7.84335e-17	8.99196e-10	0.8732	0.282186	0.0526443	3		FKRP_MOUSE	0.0003	Fukutin-related protein [Mus musculus]
SMED30008050	-5.08583	-8.20853	-0.581547	-0.792131	-0.233635	5.69592e-90	4.55785e-103	0.00206723	1.92887e-05	0.378259	3
SMED30008066	-1.84247	-1.52943	-0.743387	-0.0941911	0.313428	7.58905e-40	1.44251e-27	1.06565e-07	0.644885	0.0687959	3		WBS27_HUMAN	4e-10	Williams-Beuren syndrome chromosomal region 27 protein [Homo sapiens]
SMED30008076	-0.445675	-0.386014	-0.112871	-0.225025	0.0675012	2.94517e-16	1.67719e-12	0.0981481	0.000104006	0.412319	3
SMED30008101	-0.379819	-0.570435	-0.504258	-0.706327	-0.737393	1.38829e-05	1.03427e-11	4.45377e-09	8.78766e-17	1.655e-14	2		RPF2_BOVIN	1e-39	Ribosome production factor 2 homolog
SMED30008120	-1.15914	-1.17766	-2.61165	-2.69394	-3.22064	5.71143e-20	1.46188e-20	1.35271e-86	8.45133e-90	2.74733e-85	1	Y
SMED30008147	-0.508615	-1.02797	0.361891	0.425187	0.490057	0.000349883	5.62251e-14	0.0118243	0.00171441	0.000998952	3
SMED30008155	-0.436512	-0.205515	-0.904364	-0.401675	-0.329082	0.000437035	0.132993	7.58403e-14	0.0012935	0.026969	2		YSMU_CAEEL	2e-59	Uncharacterized protein F13E9.13, mitochondrial
SMED30008157	-0.633745	-0.687879	-0.132181	0.00482829	-0.168095	1.58916e-17	1.24671e-20	0.1654	0.974922	0.0846945	3		TSTD3_MOUSE	5e-13	Thiosulfate sulfurtransferase/rhodanese-like domain-containing protein 3
SMED30008173	-1.48556	-1.94608	-0.670937	-1.08471	-0.780773	5.33737e-14	2.71046e-22	0.000362377	3.15998e-09	4.87749e-05	3
SMED30008187	-1.57142	-1.97864	-0.976881	-1.47111	-1.21807	1.37646e-19	1.97681e-27	3.42197e-09	2.7632e-17	3.23588e-09	1		CIB2_RAT	5e-26	Calcium and integrin-binding family member 2 [Rattus norvegicus]
SMED30008199	-1.08672	-1.38263	-0.493364	-0.55217	-0.243654	1.73784e-14	1.82181e-20	0.000302253	7.60816e-05	0.200012	3
SMED30008213	-0.934776	-1.1178	-0.440808	-0.538084	-0.568275	4.15459e-14	3.72417e-20	0.000555819	1.01301e-05	3.37862e-05	3		NUD16_HUMAN	1e-40	U8 snoRNA-decapping enzyme
SMED30008223	0.0106323	-0.207896	-0.348139	-0.808213	-1.85098	0.974985	0.308808	0.0742163	4.5114e-06	1.61773e-18	2		POLR_DROME	6e-18	Retrovirus-related Pol polyprotein from type-2 retrotransposable element R2DM
SMED30008233	-0.236347	-0.530129	-0.20316	-0.309983	-0.23281	0.000426071	7.05186e-18	0.00367812	1.40023e-06	0.00191457	3		PPP6_MOUSE	3e-155	Serine/threonine-protein phosphatase 6 catalytic subunit
SMED30008258	-0.698689	-0.689236	-0.430635	-0.305365	-0.514309	1.79656e-20	3.6459e-20	3.95084e-08	0.000134186	2.59089e-09	3		CYBP_MOUSE	4e-32	Calcyclin-binding protein
SMED30008269	-0.0422177	-0.375626	-0.389814	-0.476161	-0.416417	0.512732	1.6988e-17	5.77603e-18	4.72607e-27	1.66766e-16	1		NCKP1_DANRE	7e-145	Nck-associated protein 1
SMED30008318	-0.983051	-1.40078	-0.511254	-0.738667	-0.619531	6.71903e-31	9.41173e-59	2.88597e-09	2.93631e-18	1.92752e-10	1		TEP1_RAT	3e-30	Telomerase protein component 1
SMED30008349	-0.342412	-0.564013	-0.293048	-0.347528	-0.419167	1.87663e-09	3.75944e-25	3.62849e-07	3.13393e-10	6.82294e-11	3		SETMR_HUMAN	4e-37	Histone-lysine N-methyltransferase SETMAR
SMED30008364	-1.38909	-1.38538	-1.1266	-1.10851	-1.3703	1.16885e-54	1.06994e-55	1.22335e-38	2.0633e-37	2.06329e-40	1		S26A5_RAT	4e-111	Prestin
SMED30008365	-2.64276	-6.19304	-1.21029	-1.82499	-1.30297	7.20013e-63	8.67672e-153	1.05707e-16	7.58255e-34	4.46811e-14	1		S36A4_XENLA	1e-49	Proton-coupled amino acid transporter 4
SMED30008368	0.234242	-0.2292	-0.51288	-1.21694	-2.11331	0.063541	0.0726851	2.89498e-05	1.2917e-22	4.72313e-36	2		RTEL1_DANRE	0	Regulator of telomere elongation helicase 1 [Danio rerio]
SMED30008385	-1.48557	-1.87954	-1.12811	-0.971917	-0.859979	9.05778e-42	1.66665e-63	9.11565e-27	5.3356e-21	8.82795e-13	1		S13A2_MOUSE	2e-109	Solute carrier family 13 member 2
SMED30008388	-0.829156	-1.07293	1.3548	1.46309	1.48554	8.5515e-11	2.01056e-17	4.99361e-40	5.52752e-48	5.25334e-42	3		EAA2_MOUSE	1e-100	Excitatory amino acid transporter 2
SMED30008399	-3.54927	-7.49946	-1.35847	-3.18213	-2.44535	2.06549e-10	8.16414e-20	0.000980733	4.78161e-12	0.000256276	3		ZN862_HUMAN	9e-05	Zinc finger protein 862 [Homo sapiens]
SMED30008405	-0.468649	-0.909747	-0.251538	-0.45555	0.0170761	8.81845e-10	7.49163e-35	0.00241463	1.57826e-09	0.903834	3		SCRB2_RAT	1e-90	Lysosome membrane protein 2
SMED30008415	-0.213472	-0.673452	-0.136392	-0.42344	-0.406113	0.00299438	4.45428e-26	0.0893009	6.90663e-11	3.64143e-08	3		SEH1_XENTR	1e-108	Nucleoporin seh1
SMED30008427	-0.570488	-0.530094	-0.238963	-0.147214	-0.0345341	1.86558e-24	7.8601e-22	3.38317e-05	0.0156738	0.710342	3		SIDT1_HUMAN	5e-132	SID1 transmembrane family member 1
SMED30008437	-0.0349734	-0.378705	-0.350188	-0.695614	-0.828988	0.730069	3.16747e-09	1.30135e-07	9.41853e-28	2.55515e-29	2		TIA1_MOUSE	3e-39	Nucleolysin TIA-1
SMED30008441	-0.349638	-0.550041	0.160213	0.116649	0.342307	5.53003e-09	1.3454e-21	0.0160427	0.0887677	1.08362e-07	3		AL1L1_XENTR	0	Cytosolic 10-formyltetrahydrofolate dehydrogenase
SMED30008468	-0.00216189	-0.382094	-0.332582	-0.697729	-0.789125	0.99301	8.05078e-07	7.55523e-05	1.98203e-19	1.42458e-18	2		CEBPZ_HUMAN	1e-74	CCAAT/enhancer-binding protein zeta
SMED30008485	-0.361313	-0.586907	-0.458937	-0.637505	-1.05943	8.9921e-06	3.94007e-13	1.15309e-08	6.07071e-15	1.5249e-28	2		RS5_HUMAN	6e-100	40S ribosomal protein S5
SMED30008487	-0.870411	-1.27336	-0.450302	-0.574863	-0.438788	1.61262e-43	2.75062e-91	4.6754e-12	1.54007e-19	1.71694e-09	1		FKB15_HUMAN	2e-47	FK506-binding protein 15
SMED30008488	-2.1954	-3.88562	-2.05412	-2.59255	-2.62263	1.69644e-26	3.07329e-55	3.32167e-24	8.68216e-34	7.27754e-27	1		BEST1_HUMAN	5e-59	Bestrophin-1
SMED30008505	0.0854993	-0.770626	-3.77441	-5.42804	-4.91662	0.58076	1.44496e-12	1.7518e-152	1.62076e-203	9.34821e-121	2		SOX8_TETNG	2e-20	Transcription factor Sox-8 [Tetraodon nigroviridis]
SMED30008513	-0.802574	-0.551283	-0.0040612	0.214734	0.0613568	1.00153e-21	5.83824e-11	0.98193	0.0161872	0.642623	3		APEH_MOUSE	9e-125	Acylamino-acid-releasing enzyme
SMED30008521	-3.03708	-4.58183	-1.2505	-1.81473	-1.33293	8.54189e-27	4.23401e-41	2.0905e-07	2.53858e-13	9.74918e-06	3		LOXL4_HUMAN	3e-17	Lysyl oxidase homolog 4
SMED30008522	-0.779324	-0.363199	-0.6651	0.0424984	0.137582	4.72379e-18	0.000134979	3.95411e-13	0.771476	0.287765	3		FABP4_BOVIN	1e-24	Fatty acid-binding protein, adipocyte
SMED30008540	-1.07965	-1.13293	-0.258845	-0.490545	-0.432753	1.03658e-54	8.25511e-62	0.000337289	3.56351e-13	2.53242e-08	3		SOAT1_CRIGR	2e-132	Sterol O-acyltransferase 1
SMED30008607	-2.1768	-4.91761	-0.672024	-1.05075	-1.19975	9.04457e-32	1.95021e-70	5.45143e-05	8.06555e-10	3.8599e-09	3		CIB1_RAT	2e-32	Calcium and integrin-binding protein 1
SMED30008618	-1.37759	-2.00626	-0.420562	-0.76619	-0.562794	2.34599e-45	2.23624e-91	2.75414e-05	4.35392e-16	2.01254e-07	1		ADA_DANRE	3e-81	Adenosine deaminase
SMED30008699	-0.595448	-0.648287	-0.109971	-0.158809	0.125175	2.92525e-14	2.62887e-17	0.287929	0.0770987	0.232215	3		ARHGA_HUMAN	8e-07	Rho guanine nucleotide exchange factor 10 [Homo sapiens]
SMED30008715	-1.40033	-1.31528	-0.687348	-0.619721	-0.461902	5.08419e-19	1.25866e-18	5.10613e-06	2.11592e-05	0.0090222	3
SMED30008732	-0.0531818	0.15329	-0.542005	-0.401238	-0.0858721	0.568381	0.0269884	7.86276e-17	6.14319e-10	0.363634	2
SMED30008762	-1.39437	-2.25824	-0.812636	-0.799637	-1.74952	1.34974e-19	9.33505e-46	1.18248e-07	6.39647e-08	2.86097e-23	1
SMED30008782	-0.961156	-1.02558	-0.406013	-0.628469	-0.506932	1.09766e-17	1.16189e-19	0.00042058	2.33333e-08	0.000106612	3		MGLL_MOUSE	5e-41	Monoglyceride lipase
SMED30008797	-1.74871	-2.86116	-0.586248	-0.698467	-0.363038	1.07064e-78	7.57525e-180	2.11919e-10	1.07611e-14	0.000697422	1
SMED30008798	-2.11601	-3.03483	-0.9447	-1.05107	-0.844136	4.29817e-107	8.4443e-191	4.30013e-24	2.38917e-29	3.11256e-15	1		KAPR2_DROME	8e-80	cAMP-dependent protein kinase type II regulatory subunit [Drosophila melanogaster]
SMED30008800	-0.809322	-1.33126	-2.39919	-2.27789	-2.41127	0.00052129	3.71273e-09	4.30588e-20	1.75052e-19	5.65395e-14	2
SMED30008806	-1.93801	-2.70888	-0.96776	-1.21717	-0.348891	2.42952e-86	2.46284e-134	1.14435e-28	8.65716e-41	0.00156073	1		S26A6_MOUSE	7e-120	Solute carrier family 26 member 6
SMED30008823	-0.789256	-1.15098	-0.281444	-0.751544	-1.68129	2.96543e-21	1.40726e-43	0.00244908	3.52897e-19	1.35214e-65	1		DNPEP_HUMAN	2e-142	Aspartyl aminopeptidase [Homo sapiens]
SMED30008855	-2.09548	-3.61645	-1.03543	-1.34982	-0.991379	2.38025e-72	2.88967e-165	4.03118e-20	9.19388e-33	1.59929e-14	1	Y	ATP7B_MOUSE	0	Copper-transporting ATPase 2
SMED30008856	0.355158	0.643167	-0.901047	-1.00522	-0.999377	5.82481e-07	2.77522e-22	1.83868e-34	1.63115e-41	1.64714e-30	2
SMED30008895	-0.439085	-0.741887	-0.318502	-0.475046	-0.51133	1.0712e-12	2.30377e-35	6.28991e-07	6.14082e-15	9.98616e-14	1		ABCF1_PIG	0	ATP-binding cassette sub-family F member 1 [Sus scrofa]
SMED30008902	-0.507185	-0.335494	-0.71578	-0.715739	-0.850232	6.749e-16	1.09303e-07	2.86072e-30	6.24304e-29	8.92359e-28	1		SUR1_YEAST	7e-21	Mannosyl phosphorylinositol ceramide synthase SUR1 [Saccharomyces cerevisiae S288c]
SMED30008921	-0.283589	-0.992386	-2.64665	-3.0908	-3.67401	0.0637419	5.21401e-13	2.14108e-69	1.83084e-77	2.16363e-64	2
SMED30008954	-0.916215	-1.13808	0.550077	0.618023	0.709622	2.2589e-32	4.50866e-49	8.60105e-14	1.31033e-17	8.44685e-19	3		S13A5_RAT	9e-96	Solute carrier family 13 member 5
SMED30008984	0.0300545	-0.383663	-0.217333	-0.546628	-0.578055	0.797849	5.05932e-08	0.00651763	5.60093e-15	2.92131e-13	2		Y0417_DROME	2e-63	Probable protein phosphatase CG10417 [Drosophila melanogaster]
SMED30008986	-0.326852	-0.970977	0.793639	0.837359	1.32303	0.0129425	2.03623e-16	6.26529e-12	2.00714e-13	6.2551e-28	3
SMED30009016	0.087319	-0.043483	-0.171228	-0.336227	-0.791137	0.293208	0.636756	0.020316	3.4802e-07	1.13958e-25	2		SSRP1_HUMAN	7e-115	FACT complex subunit SSRP1
SMED30009017	-2.70728	-3.64599	-0.86075	-1.00971	-1.23167	4.55656e-63	2.91744e-85	1.43842e-11	1.2618e-14	1.49013e-15	1	Y
SMED30009032	-0.0470048	-0.281942	-0.758266	-1.41222	-2.68059	0.801923	0.0397931	5.17608e-10	2.54905e-25	1.20345e-47	2		DCTD_PONAB	2e-58	Deoxycytidylate deaminase
SMED30009057	-1.38608	-1.37908	-0.675413	-0.705807	-0.83539	6.86924e-30	7.54651e-28	2.54528e-09	2.8029e-09	3.64613e-11	3		YR848_MIMIV	5e-19	Putative ankyrin repeat protein R848 [Acanthamoeba polyphaga mimivirus]
SMED30009141	-2.60405	-3.32553	-0.81784	-0.970196	-1.1867	7.85194e-42	2.20968e-38	1.86019e-07	3.30275e-07	1.52783e-07	3		IF4G_WHEAT	7e-19	Eukaryotic translation initiation factor 4G
SMED30009143	-0.564714	-0.794394	-0.125745	-0.250062	-0.158452	1.14415e-14	1.93255e-29	0.17237	0.000895554	0.0807748	3
SMED30009199	-1.49048	-1.88145	-0.490021	-0.367721	-0.0660727	4.79864e-12	1.27337e-17	0.0157711	0.0710167	0.81612	3		SETMR_HUMAN	1e-09	Histone-lysine N-methyltransferase SETMAR
SMED30009201	-0.672346	-0.918715	-0.573519	-0.517564	-0.310727	3.38511e-16	1.92799e-29	7.74781e-12	5.49028e-10	0.00168022	3		TRAF6_BOVIN	6e-10	TNF receptor-associated factor 6
SMED30009255	-0.336417	-0.347875	-0.506915	-0.520866	-0.24053	7.226e-08	1.44573e-08	1.63222e-16	1.3103e-17	0.000968119	2		S12A9_XENLA	4e-137	Solute carrier family 12 member 9
SMED30009267	-2.87381	-2.22861	-5.56166	-3.86167	-4.49589	3.86505e-19	1.22911e-07	2.62676e-34	5.91954e-13	9.64594e-13	1
SMED30009281	-0.740816	-0.777959	-0.956132	-0.90462	-1.02062	8.77678e-30	1.27275e-32	3.23103e-48	6.72489e-43	3.50467e-41	1		LAMB1_HUMAN	0	Laminin subunit beta-1
SMED30009283	-0.334694	-0.449386	-0.375672	-0.537853	-0.614743	7.86037e-08	1.14295e-13	1.94832e-09	7.45639e-19	3.12403e-19	2		RL18A_ICTPU	1e-73	60S ribosomal protein L18a [Ictalurus punctatus]
SMED30009284	-0.212284	-0.384606	-0.312712	-0.392118	-0.566483	2.74863e-05	7.29779e-16	2.44579e-10	3.7472e-16	6.44807e-26	1		HSP7F_CAEEL	0	Heat shock 70 kDa protein F, mitochondrial
SMED30009287	-0.735504	-0.93879	-0.675084	-0.687968	-0.640116	1.16862e-32	4.8711e-51	4.82426e-28	1.6029e-28	2.43758e-19	1		PAK1_BOVIN	4e-16	Serine/threonine-protein kinase PAK 1
SMED30009302	-0.218161	-0.935655	-3.95889	-4.43851	-4.70631	0.412214	2.64016e-06	2.1274e-75	1.42762e-88	1.29282e-66	2
SMED30009337	-2.61009	-6.28407	-1.02449	-1.69521	-1.43249	2.75594e-78	1.00302e-231	2.12511e-14	2.23474e-36	2.08768e-20	1
SMED30009340	-1.93399	-2.46763	-0.435104	-0.813179	-1.05553	9.46024e-84	4.68433e-118	3.99968e-06	2.86516e-18	3.85425e-22	1
SMED30009368	-0.914423	-1.24325	-0.234263	-0.194259	-0.180614	8.77692e-38	7.56327e-68	0.00319267	0.0151284	0.0494388	3		HEM3_HUMAN	4e-93	Porphobilinogen deaminase
SMED30009385	-0.919876	-1.14838	-0.422288	-0.609761	-0.402151	1.1196e-25	5.1942e-39	3.39333e-06	4.45078e-12	9.42751e-05	3		MPRD_BOVIN	3e-20	Cation-dependent mannose-6-phosphate receptor
SMED30009393	0.262758	-0.031779	-0.0989845	-1.3309	-2.46069	0.342928	0.928077	0.791596	4.15629e-08	2.60739e-14	2		CPSF4_HUMAN	8e-71	Cleavage and polyadenylation specificity factor subunit 4
SMED30009415	0.206921	0.0927323	-0.266057	-0.973834	-2.75951	0.302045	0.684069	0.194176	3.1001e-08	1.37685e-33	2
SMED30009426	-0.825154	-0.506143	-0.0250409	0.227654	0.279405	2.74778e-19	5.30099e-08	0.876087	0.0192026	0.00793598	3
SMED30009446	-0.612213	-0.632403	-0.693181	-0.401336	-0.503053	6.52886e-17	2.86797e-17	2.05461e-21	1.14963e-07	2.19807e-09	1		GGT1_RAT	3e-110	Gamma-glutamyltranspeptidase 1
SMED30009450	-0.992647	-0.939632	-0.358712	-0.381217	-0.520447	9.05778e-42	1.08906e-38	5.41811e-07	8.05355e-08	3.2777e-10	3
SMED30009491	0.275026	0.0609929	-0.640829	-0.983864	-1.35823	0.019899	0.698702	3.88743e-08	4.55436e-17	2.91111e-21	2		DPOA2_RAT	1e-25	DNA polymerase alpha subunit B
SMED30009513	-1.82606	-2.10414	-1.99494	-2.37113	-2.93821	9.83418e-72	1.39692e-93	4.18941e-84	5.28615e-115	2.19022e-118	1	Y	GATM_BOVIN	1e-118	Glycine amidinotransferase, mitochondrial
SMED30009521	-0.45015	-0.75471	-0.0501556	-0.196496	-0.681256	2.11208e-05	1.33048e-14	0.757923	0.0702162	1.13484e-09	3		SCND3_HUMAN	5e-45	SCAN domain-containing protein 3
SMED30009527	0.232024	-0.166529	-0.642855	-1.25176	-2.55988	0.273656	0.445487	0.00124179	7.98775e-11	1.35139e-16	2		KI21A_MOUSE	1e-81	Kinesin-like protein KIF21A [Mus musculus]
SMED30009541	-0.0508343	-0.108803	-0.423052	-0.367838	-0.397739	0.486126	0.0681294	4.34803e-16	1.70182e-12	2.21635e-11	2		NB5R3_RAT	5e-122	NADH-cytochrome b5 reductase 3
SMED30009557	-0.581167	-0.845894	-0.465865	-0.592785	-0.518165	9.53373e-14	1.21867e-28	4.24267e-09	1.22337e-14	3.22862e-09	1		MTRR_MOUSE	2e-107	Methionine synthase reductase
SMED30009590	0.148923	0.00218836	-0.398203	-0.69041	-1.2348	0.184344	0.987973	6.00216e-05	1.25489e-12	2.27119e-25	2		RA54B_MOUSE	1e-169	DNA repair and recombination protein RAD54B
SMED30009612	-1.67592	-2.91564	-0.634981	-0.837456	-0.547031	1.12002e-33	1.92502e-68	1.23817e-07	7.72171e-12	7.63671e-05	3		PRR5L_RAT	5e-08	Proline-rich protein 5-like
SMED30009651	0.511419	0.184314	-0.176683	-0.869425	-2.0682	8.48081e-06	0.173716	0.255287	6.875e-13	1.654e-38	2		NSD2_MOUSE	7e-116	Histone-lysine N-methyltransferase NSD2
SMED30009657	-1.75103	-2.09606	-0.290199	-0.144763	0.0749086	1.22791e-78	2.99963e-103	0.00126818	0.152569	0.559799	3		TRAF3_HUMAN	4e-27	TNF receptor-associated factor 3
SMED30009673	-0.177678	-0.42662	-0.240724	-0.287726	-0.579684	0.010687	7.22621e-13	0.000293596	2.28967e-06	7.44907e-18	2		TSR1_MOUSE	9e-54	Pre-rRNA-processing protein TSR1 homolog [Mus musculus]
SMED30009695	-0.522979	-0.455513	-0.33957	-0.361543	-0.267777	3.6444e-21	1.35693e-16	2.88597e-09	1.34631e-10	4.04653e-05	3		RALA_RAT	9e-87	Ras-related protein Ral-A
SMED30009760	0.687411	0.387036	-0.295362	-0.58812	-2.73643	0.00205379	0.144175	0.357878	0.0424997	2.31865e-15	2
SMED30009787	-1.06718	-1.40801	-0.928884	-1.20873	-1.32853	4.80844e-28	6.81606e-48	3.38818e-21	1.71015e-35	2.93866e-32	1		LAMA1_HUMAN	0	Laminin subunit alpha-1
SMED30009801	-0.108348	-0.0971334	-1.5147	-1.70836	-2.20831	0.43945	0.481802	8.27872e-52	5.58655e-65	2.99819e-76	2
SMED30009803	-2.03062	-3.03302	-0.347449	-0.541642	-1.03078	3.09844e-19	7.32754e-29	0.130697	0.0141339	4.63169e-05	3
SMED30009811	-7.16757	-8.17262	-2.3572	-3.00884	-2.62571	6.10315e-78	5.21776e-92	2.23778e-33	8.75426e-49	1.19539e-25	1		MOT5_MOUSE	2e-30	Monocarboxylate transporter 5
SMED30009858	0.356488	0.0767909	-0.0313008	-0.369398	-0.830835	7.88808e-06	0.463111	0.822232	4.89452e-06	4.46927e-20	2		TIA1_HUMAN	7e-35	Nucleolysin TIA-1 isoform p40
SMED30009859	-0.237663	-0.403603	-0.356203	-0.521657	-0.663051	0.00193616	1.39565e-08	1.39044e-06	1.68542e-13	8.48056e-17	2		RS24_TAKRU	8e-49	40S ribosomal protein S24 [Takifugu rubripes]
SMED30009913	-0.430796	-0.655233	-0.428784	-0.462027	-0.200667	4.49107e-10	3.06348e-22	8.13088e-10	2.12443e-11	0.0187034	3		BUP1_PONAB	5e-172	Beta-ureidopropionase
SMED30009990	-0.627939	-0.793936	-0.0933975	-0.385282	-0.0549204	5.05886e-20	2.42871e-32	0.3125	1.85047e-08	0.616802	3		SPNS1_XENLA	1e-124	Protein spinster homolog 1 [Xenopus laevis]
SMED30010011	-1.53129	-2.29349	-0.505035	-0.631256	-0.285336	2.51102e-65	1.5642e-130	2.8409e-08	1.57389e-12	0.00894767	3		UNC7_CAEEL	9e-52	Innexin unc-7
SMED30010013	-1.33937	-1.30951	-0.198955	-0.280365	-0.359422	2.99574e-18	2.21807e-18	0.239802	0.0654039	0.0460678	3
SMED30010045	-1.23419	-2.90042	-0.679508	-1.01857	-0.341245	1.21774e-37	7.46127e-149	2.1167e-12	1.48453e-25	0.00355732	1		MESH_BOMMO	1e-08	Protein mesh
SMED30010048	-1.47229	-2.02422	-0.391238	-0.682753	-0.173704	7.44318e-49	6.67631e-82	4.95878e-05	2.96679e-13	0.163595	3
SMED30010050	-0.654631	-0.734023	-0.362971	-0.330028	-0.308653	2.45403e-20	6.20769e-26	7.73539e-07	5.35325e-06	0.000203502	3		Y4251_DICDI	1e-39	Probable serine/threonine-protein kinase DDB_G0284251 [Dictyostelium discoideum]
SMED30010061	-0.779956	-1.08825	-0.427426	-0.491268	-0.329143	2.8019e-46	2.41602e-88	1.82146e-14	3.91694e-19	2.2023e-07	1		A1CF_PONAB	1e-115	APOBEC1 complementation factor
SMED30010074	0.280406	0.143074	-0.152426	-0.348118	-0.772837	0.000653288	0.113392	0.12624	2.76798e-05	2.13327e-16	2		ZMYM5_BOVIN	2e-12	Zinc finger MYM-type protein 5 [Bos taurus]
SMED30010115	0.316031	0.0797416	0.00469723	-0.626228	-1.52962	0.00532369	0.586069	0.984242	4.43543e-09	7.42976e-34	2		RIR2_DANRE	1e-146	Ribonucleoside-diphosphate reductase subunit M2
SMED30010124	0.159173	-0.00805159	-0.180892	-0.347823	-0.543024	0.027779	0.941493	0.0129566	1.01079e-07	7.10472e-14	2		ANM1_XENTR	2e-166	Protein arginine N-methyltransferase 1
SMED30010160	-0.700063	-0.592198	0.0153423	0.0604096	-0.772759	1.93706e-18	6.81856e-14	0.918002	0.598183	1.48029e-17	1
SMED30010163	-1.54107	-1.08967	-0.924137	-0.430264	-0.737115	1.14429e-16	5.68321e-09	1.49565e-06	0.0421473	0.000833208	3
SMED30010200	-2.16623	-5.80032	-1.08223	-1.64749	-1.10562	4.03009e-37	3.01972e-145	2.06962e-10	2.20335e-22	1.31986e-08	1		3HAO_RAT	1e-47	3-hydroxyanthranilate 3,4-dioxygenase
SMED30010208	0.0721909	-0.166675	-0.47118	-0.601679	-0.519659	0.421182	0.0220179	2.61513e-12	1.08041e-19	9.06151e-12	2		MDHM_PONAB	1e-121	Malate dehydrogenase, mitochondrial
SMED30010219	-0.587116	-0.291537	-0.285727	-0.269231	0.00627711	4.56686e-19	1.93994e-05	4.74968e-05	0.000113068	0.962753	3		RTN2_XENTR	5e-15	Reticulon-2 [Xenopus (Silurana) tropicalis]
SMED30010227	-0.182249	-0.416818	-0.18819	-0.359892	-0.330422	0.00288689	4.38216e-14	0.00239312	1.61022e-10	2.32708e-07	3		CSHB_BACCR	4e-05	DEAD-box ATP-dependent RNA helicase CshB [Bacillus cereus ATCC 14579]
SMED30010270	-0.590424	-0.603145	-0.52122	-0.499531	-0.404177	9.37251e-21	3.60872e-22	2.7776e-16	2.43404e-15	2.67549e-08	1		ADAS_MOUSE	0	Alkyldihydroxyacetonephosphate synthase, peroxisomal
SMED30010286	-0.126847	-0.30646	-0.367485	-0.564959	-0.705049	0.175519	6.41595e-05	3.21411e-06	8.93375e-14	5.09644e-16	2		MED17_DANRE	2e-20	Mediator of RNA polymerase II transcription subunit 17
SMED30010297	0.194775	-0.0620147	-0.524308	-1.11886	-3.07966	0.212315	0.740997	7.40304e-05	6.02913e-19	9.79264e-79	2		LAMC_DROME	1e-19	Lamin-C
SMED30010316	-0.590508	-0.737433	-0.119681	-0.29064	-0.641233	9.18697e-16	3.02154e-25	0.197637	8.91099e-05	1.5765e-14	1		EMAL6_HUMAN	0	Echinoderm microtubule-associated protein-like 6
SMED30010350	-1.37905	-3.91812	-0.349948	-1.0072	-1.09442	8.03799e-15	8.77358e-95	0.112852	2.54261e-08	1.17929e-07	3
SMED30010354	-1.20954	-2.06196	-0.914076	-1.30981	-1.14408	3.59941e-14	9.67218e-33	1.55073e-09	2.86472e-17	4.97794e-11	1		YFIG_BACSU	1e-23	Putative metabolite transport protein YfiG [Bacillus subtilis subsp. subtilis str. 168]
SMED30010366	-2.08849	-2.64758	-2.08532	-1.97279	-2.3835	9.48585e-54	6.9482e-68	1.01928e-55	1.43646e-45	4.4453e-44	1	Y	DIC_HUMAN	3e-86	Mitochondrial dicarboxylate carrier
SMED30010370	-0.495564	-0.457378	0.200179	0.469897	0.630153	2.86191e-15	3.61142e-13	0.00233712	1.22899e-15	4.23788e-23	3		TLDC2_HUMAN	2e-30	TLD domain-containing protein 2
SMED30010404	-1.93328	-2.13728	-2.80337	-2.8014	-3.33567	7.56323e-45	1.12848e-53	2.87893e-86	2.31645e-85	8.81503e-82	1
SMED30010415	-0.852155	-0.566056	-2.69607	-2.74689	-1.93363	1.15459e-12	5.90175e-06	5.86032e-87	4.45132e-78	8.6963e-34	2
SMED30010418	0.110827	0.00271411	-0.266514	-0.522623	-0.993974	0.259081	0.981768	0.00160726	2.34795e-11	3.31482e-28	2		TOP2B_CHICK	0	DNA topoisomerase 2-beta
SMED30010424	-0.0368996	-0.323873	-0.404444	-0.763703	-1.96494	0.902671	0.127333	0.0531688	8.46589e-05	5.88131e-16	2		PRI1_HUMAN	5e-117	DNA primase small subunit
SMED30010434	-3.47705	-6.37557	-2.65894	-3.96527	-2.59703	2.69891e-17	1.25811e-27	1.70451e-13	7.83368e-21	1.33002e-11	1
SMED30010443	-0.597408	-0.565169	-0.0315802	-0.00313658	-0.042067	1.35659e-17	5.40104e-16	0.79296	0.980443	0.71937	3
SMED30010474	-0.362861	-0.379391	-0.270887	-0.258949	-0.231203	3.66688e-13	1.81821e-14	1.05568e-07	3.59041e-07	7.67822e-05	3		VPS18_DANRE	8e-117	Vacuolar protein sorting-associated protein 18 homolog [Danio rerio]
SMED30010515	-0.290951	-0.953437	-0.842364	-0.839751	-0.923583	0.00792411	4.87221e-22	6.6445e-17	3.61262e-17	1.45902e-16	1
SMED30010528	-0.19293	-1.15309	-1.01227	-1.28161	-1.61295	0.0689714	4.14343e-39	1.57968e-29	4.67214e-47	6.42749e-54	1	Y
SMED30010533	-0.446044	-0.36559	-0.166373	0.0229126	0.369461	1.43077e-17	1.52807e-12	0.00331705	0.77772	1.1351e-11	3		ZMYM6_HUMAN	3e-101	Zinc finger MYM-type protein 6
SMED30010540	-1.0681	-1.14963	-0.548411	-0.411494	-0.561102	2.01735e-39	7.33986e-46	9.07186e-12	3.36088e-07	1.30204e-09	3		LGSN_RAT	1e-51	Lengsin
SMED30010553	-0.869787	-0.761568	-0.33501	-0.207663	-0.184759	7.84416e-18	7.3679e-14	0.00197661	0.0772914	0.170128	3		TPC2L_XENTR	2e-36	Trafficking protein particle complex subunit 2-like protein [Xenopus (Silurana) tropicalis]
SMED30010669	-1.14657	-1.40162	0.40161	0.51812	0.555291	2.35215e-12	3.27768e-17	0.0178385	0.00107736	0.00218511	3
SMED30010718	-1.4779	-1.79576	-0.208099	-0.281249	-0.27537	2.24333e-48	5.6866e-67	0.0723257	0.00816451	0.0229943	3		CDKL3_MACFA	5e-09	Cyclin-dependent kinase-like 3 [Macaca fascicularis]
SMED30010729	-0.180831	-0.424741	-0.30691	-0.57908	-0.649154	0.0093809	8.35003e-12	2.60151e-06	1.95676e-20	2.02778e-19	2		TIA1_MOUSE	1e-63	Nucleolysin TIA-1
SMED30010792	-0.531485	-0.755871	-0.504744	-0.465557	-0.527192	4.28247e-11	2.81398e-21	4.04873e-10	7.32685e-09	1.00568e-08	3		M2K1_ORYSJ	9e-16	Mitogen-activated protein kinase kinase 1
SMED30010808	-1.45326	-1.28722	-0.770912	-0.997911	-1.64392	1.33785e-33	1.02652e-25	8.80674e-12	1.13713e-16	4.89823e-29	1		ELOV4_MACFA	5e-62	Elongation of very long chain fatty acids protein 4
SMED30010816	-0.704286	-0.614239	-0.422595	-0.350968	-0.412957	9.38493e-33	1.77833e-25	2.57339e-12	7.09187e-09	1.19105e-09	3		SHAN3_HUMAN	1e-75	SH3 and multiple ankyrin repeat domains protein 3
SMED30010830	-0.785142	-0.88012	-0.698188	-0.75233	-0.695395	8.68637e-36	8.35346e-45	8.72735e-29	4.81424e-33	4.81145e-22	1		FOLC_BOVIN	7e-81	Folylpolyglutamate synthase, mitochondrial
SMED30010845	-0.0491268	-0.331898	-0.338487	-0.629608	-0.793319	0.714756	0.000197686	0.000271512	8.2496e-13	1.5036e-14	2		SNUT2_HUMAN	0	U4/U6.U5 tri-snRNP-associated protein 2
SMED30010906	0.119665	-0.43936	-0.442506	-1.04923	-1.33066	0.349684	6.48193e-06	1.7794e-05	4.35252e-27	6.53087e-30	2		SMC2_XENLA	0	Structural maintenance of chromosomes protein 2
SMED30010922	-0.888188	-0.730376	-0.188911	0.0554511	-0.0773871	6.77446e-19	3.13683e-13	0.105876	0.705272	0.630052	3
SMED30010944	-1.4484	-1.52703	-0.838406	-1.04655	-1.13346	2.98724e-18	1.93034e-20	2.39789e-07	8.10919e-11	6.24403e-10	3		PO22_POPJA	1e-22	Retrovirus-related Pol polyprotein from type-1 retrotransposable element R2
SMED30010947	-3.58351	-3.73453	-0.958288	-1.16501	-1.12248	1.58942e-88	2.66078e-81	3.96522e-13	3.08823e-16	4.91803e-12	1
SMED30010951	-2.13972	-2.36437	-2.11776	-2.46071	-2.50136	4.3109e-107	7.19166e-126	2.63231e-105	1.73869e-133	3.36489e-98	1	Y
SMED30010963	-0.515069	-0.862105	0.128174	-0.192467	-0.114532	2.25921e-10	1.59712e-29	0.203034	0.0246338	0.301294	3		YPD7_CAEEL	6e-52	Uncharacterized protein C05D11.7 [Caenorhabditis elegans]
SMED30010964	-2.6761	-5.27234	-1.58922	-2.09326	-1.72629	1.00755e-87	3.451e-169	5.95197e-38	2.13798e-55	3.54348e-29	1		PANK4_HUMAN	8e-13	Pantothenate kinase 4
SMED30010974	-1.54388	-2.02446	-0.582903	-0.690609	-0.337075	9.87593e-86	4.7555e-141	3.10064e-13	1.90865e-18	0.000334047	1		UNC9_CAEEL	2e-65	Innexin unc-9
SMED30010978	-0.0224287	-0.214562	-0.281729	-0.709012	-1.03236	0.839242	0.00167937	4.87318e-05	3.10157e-27	1.33072e-40	2		NU155_RAT	9e-126	Nuclear pore complex protein Nup155
SMED30010986	-2.84711	-4.32283	-0.98733	-1.55493	-1.33489	5.35218e-57	1.98632e-89	1.07666e-10	7.74382e-23	5.62319e-14	1	Y	LOL2A_DANRE	1e-71	Lysyl oxidase homolog 2A
SMED30010988	-1.09467	-2.74582	-0.402411	-1.07149	0.269042	1.25704e-10	7.91924e-41	0.0196778	6.20968e-11	0.211091	3
SMED30011035	-0.12073	-0.179654	-0.504217	-0.788958	-1.12554	0.384461	0.137013	3.86757e-06	1.3517e-13	2.28119e-18	2		AGK_HUMAN	2e-41	Acylglycerol kinase, mitochondrial
SMED30011043	0.491639	0.1435	0.068086	-0.506418	-1.68074	6.99134e-05	0.363166	0.743793	0.000228204	2.53174e-19	2		CHK1_HUMAN	1e-32	Serine/threonine-protein kinase Chk1
SMED30011076	-0.947084	-0.588299	-0.323269	-0.204371	0.0696714	8.63777e-14	4.86683e-06	0.019507	0.178034	0.738106	3
SMED30011104	0.428935	0.0528176	0.0783087	-0.854143	-2.09165	0.000113515	0.737245	0.652515	2.6635e-14	7.15705e-46	2		LARP6_HUMAN	2e-17	La-related protein 6
SMED30011140	-0.327248	-0.36146	-1.57347	-1.5878	-1.79911	0.000144058	1.87263e-05	1.26229e-78	1.83084e-77	2.53353e-70	2	Y	ASSY_XENLA	0	Argininosuccinate synthase
SMED30011173	-1.06091	-1.19243	-0.631026	-0.825024	-0.874995	9.8097e-40	1.41137e-48	5.16268e-16	2.25935e-25	2.05736e-22	1		SGK1_MOUSE	3e-80	Serine/threonine-protein kinase Sgk1
SMED30011179	-1.03951	-1.12054	-0.557049	-0.35247	-2.06651	4.84995e-14	1.19444e-14	5.32183e-05	0.0205754	3.89852e-30	1
SMED30011190	-0.0580336	-0.402678	-0.301663	-0.680055	-0.571829	0.648948	1.96043e-06	0.000969616	3.04978e-16	2.32559e-09	2		NUBP2_ANOGA	1e-68	Cytosolic Fe-S cluster assembly factor NUBP2 homolog [Anopheles gambiae]
SMED30011221	-0.395556	-0.700641	-0.42976	-0.783036	-1.25895	2.81064e-09	1.63522e-27	1.2019e-10	2.46106e-33	3.24075e-61	1	Y	HSP7C_CRIGR	9e-150	Heat shock cognate 71 kDa protein
SMED30011250	-0.174454	-0.334335	-0.147418	-0.460868	-0.0880013	0.00991747	4.88774e-08	0.0398823	3.34544e-14	0.317865	2		GRN_HUMAN	2e-68	Granulins
SMED30011283	-1.82483	-1.97734	-0.990905	-1.10293	-1.27394	2.69925e-100	4.94939e-111	6.3347e-36	1.06271e-41	6.46914e-41	1
SMED30011291	-3.61914	-4.53646	-1.76827	-2.02183	-2.98083	8.41044e-187	3.42821e-222	3.32275e-73	3.31165e-85	2.13754e-100	1	Y	PA2HS_ECHCO	5e-16	Phospholipase A2 homolog
SMED30011313	-0.122823	-0.43142	-0.0163586	-0.0978029	-0.0305408	0.0654558	7.09207e-15	0.876513	0.156561	0.752221	3		LYPA1_HUMAN	2e-68	Acyl-protein thioesterase 1
SMED30011372	-0.226947	-0.442844	-0.557988	-1.01357	-1.89765	0.0419323	1.0737e-05	2.63635e-08	1.36195e-23	3.20054e-52	2		CI064_HUMAN	1e-100	UPF0553 protein C9orf64 [Homo sapiens]
SMED30011379	-0.281131	-0.37063	-0.406669	-0.342179	-0.480693	1.16056e-07	5.76175e-13	6.64588e-15	5.78735e-11	1.89483e-16	2		VMA5A_HUMAN	7e-83	von Willebrand factor A domain-containing protein 5A
SMED30011410	-0.474853	-0.610271	-0.136593	-0.0728613	0.286288	9.15788e-10	4.51951e-16	0.143438	0.472844	0.000658371	3		ESYT3_XENTR	6e-55	Extended synaptotagmin-3
SMED30011419	-0.747526	-1.20566	-4.67111	-6.74972	-6.91492	0.139806	0.00758958	3.46537e-23	3.96324e-39	6.12085e-28	2
SMED30011447	-2.69184	-3.01065	-2.94037	-3.14417	-3.39285	8.51329e-79	5.35549e-92	9.74594e-91	1.83936e-97	2.95641e-77	1	Y
SMED30011475	-0.472203	-0.470014	-0.29278	-0.309525	-0.0866752	4.50626e-15	3.839e-15	3.05538e-06	5.43054e-07	0.31818	3		GLMP_SALSA	2e-26	Glycosylated lysosomal membrane protein
SMED30011476	0.557371	0.140583	-0.44593	-0.855177	-0.834208	4.62077e-11	0.174515	7.19973e-07	2.70539e-23	3.63449e-17	2
SMED30011490	-0.171648	-0.176942	-0.353415	-0.497682	-0.943058	0.0488687	0.0362346	6.50668e-06	4.27852e-11	1.46309e-28	2		TEGU_SCHMA	4e-12	Tegument antigen
SMED30011516	0.133705	-0.0259627	-0.291498	-1.11981	-2.33394	0.448597	0.900555	0.06101	6.21189e-16	2.44275e-36	2
SMED30011590	-0.900745	-0.821716	-0.646563	-0.562294	-0.477604	4.87577e-30	1.79216e-25	3.16381e-16	1.61077e-12	2.01619e-07	1		AP3S2_BOVIN	3e-83	AP-3 complex subunit sigma-2
SMED30011623	-0.139683	-0.170718	-0.502972	-0.566034	-0.911046	0.297646	0.168874	2.30792e-06	4.96828e-08	3.58892e-15	2
SMED30011629	-1.08301	-1.03138	-0.39041	-0.428123	0.143369	5.19716e-91	3.46162e-85	3.1085e-13	5.01799e-16	0.0278811	1		DUSTY_RAT	0	Dual serine/threonine and tyrosine protein kinase
SMED30011682	-1.09033	-1.23145	0.456872	0.170309	-0.0526012	4.44574e-31	2.67257e-39	1.88185e-06	0.13058	0.741947	3
SMED30011683	-1.16674	-1.4973	-1.95227	-2.35582	-2.7444	4.14911e-07	7.42781e-12	3.50041e-15	2.4188e-21	2.78104e-14	2
SMED30011690	-0.142329	-0.252803	-0.245997	-0.38397	-0.505252	0.0335037	2.32413e-05	6.90908e-05	5.34397e-11	1.24238e-14	2		ROA2_SAGOE	8e-62	Heterogeneous nuclear ribonucleoproteins A2/B1
SMED30011700	-0.319006	-0.327437	-1.13375	-1.48718	-1.77181	0.00817417	0.0058145	3.32167e-24	4.04386e-38	2.14023e-36	2		CBPA_DICDI	9e-06	Calcium-binding protein A
SMED30011704	0.569431	0.473418	0.0732702	-0.486506	-1.29315	1.38147e-06	6.27424e-05	0.713948	0.000304846	1.41623e-15	2
SMED30011715	-0.0072864	-0.262218	-0.0787527	-0.436008	-0.724963	0.95994	0.00139545	0.491221	4.178e-08	1.38012e-15	2		RSP3_CAEEL	2e-13	Probable splicing factor, arginine/serine-rich 3
SMED30011720	-0.777788	-1.04078	-0.729208	-0.822186	-0.876648	1.65227e-18	9.98028e-33	2.88086e-16	6.50329e-21	1.63413e-18	1		NXT1_BOVIN	2e-14	NTF2-related export protein 1 [Bos taurus]
SMED30011727	-2.31006	-2.7827	-1.23185	-1.41753	-1.11005	4.35852e-147	1.04032e-196	7.99909e-48	2.98922e-61	6.87238e-30	1	Y	DOCK1_HUMAN	4e-60	Dedicator of cytokinesis protein 1
SMED30011728	-0.506827	-0.766611	-0.11099	-0.185283	0.18621	1.33125e-19	1.64761e-44	0.114416	0.00217675	0.00543496	3		DLG5_HUMAN	3e-05	Disks large homolog 5
SMED30011744	-1.33328	-1.70351	-0.384937	-0.427917	-0.58269	1.56441e-42	3.09715e-63	9.32732e-05	1.18444e-05	1.76504e-07	3		TSPO_RAT	5e-37	Translocator protein
SMED30011793	-2.14883	-4.33989	-1.37015	-2.07018	-1.55647	6.7382e-52	1.19007e-161	2.06501e-22	2.07191e-48	8.99798e-22	1	Y	DTH1_GIRTI	0	Homeobox protein DTH-1 [Girardia tigrina]
SMED30011811	0.10127	-0.119645	-0.297107	-0.522845	-0.9704	0.454672	0.343546	0.00841412	4.73926e-07	3.10334e-14	2		CND2_XENLA	5e-45	Condensin complex subunit 2
SMED30011823	-0.92753	-1.22891	-0.454755	-0.446447	-0.296114	3.56995e-27	3.06959e-42	1.6501e-07	5.38493e-07	0.00502078	3		S15A4_BOVIN	3e-52	Solute carrier family 15 member 4
SMED30011830	-0.361136	-0.524251	-0.137528	-0.320447	-0.142358	7.57764e-10	1.38247e-20	0.0424492	3.08201e-08	0.0533523	3		EHD4_MOUSE	0	EH domain-containing protein 4
SMED30011871	-0.912641	-1.17308	0.040341	0.239015	0.282655	1.66703e-16	5.8254e-25	0.814942	0.0296563	0.0140375	3		SUR1_YEAST	9e-22	Mannosyl phosphorylinositol ceramide synthase SUR1 [Saccharomyces cerevisiae S288c]
SMED30011922	-0.457394	-0.351258	-0.0783448	-0.0782759	0.0274989	1.76117e-14	3.28399e-09	0.336772	0.30988	0.792679	3		TBCEL_HUMAN	1e-26	Tubulin-specific chaperone cofactor E-like protein
SMED30011969	-3.38275	-4.08099	-1.52219	-1.70038	-1.62904	6.08321e-19	6.24343e-21	7.5522e-08	2.39055e-08	4.0526e-05	3
SMED30011975	-1.80898	-2.76489	-1.62513	-1.56625	-1.67173	1.22968e-06	6.25582e-14	7.54051e-06	1.46265e-06	1.4219e-05	3
SMED30011976	-2.21892	-3.07291	-0.90299	-1.33245	-1.1047	4.23367e-106	4.85422e-162	4.26369e-24	1.48533e-46	7.76403e-26	1
SMED30011982	-0.207654	-0.359709	-0.31751	-0.483447	-0.625848	0.0039178	5.56065e-08	3.97885e-06	1.8066e-13	2.08223e-17	2		RL17_ARGMO	4e-82	60S ribosomal protein L17 [Argas monolakensis]
SMED30012012	-2.07429	-1.75198	1.02247	1.11119	0.239871	4.99887e-20	5.69074e-15	9.53373e-08	4.96128e-09	0.398697	3		ST1C4_HUMAN	2e-39	Sulfotransferase 1C4
SMED30012026	-0.945489	-0.905534	-2.98689	-3.67171	-4.16621	5.8299e-10	3.12912e-09	8.26279e-71	4.39753e-90	4.93951e-72	2
SMED30012037	-0.746746	-0.868408	-0.115397	0.155473	0.130685	1.1446e-14	8.52453e-20	0.379172	0.167513	0.317847	3		UNC9_CAEEL	5e-45	Innexin unc-9
SMED30012072	-1.72014	-1.74117	-0.893615	-0.759942	-0.669353	4.78914e-28	1.40297e-31	1.33771e-10	1.02239e-08	1.99869e-05	3		YL063_MIMIV	1e-11	Putative ankyrin repeat protein L63 [Acanthamoeba polyphaga mimivirus]
SMED30012104	-0.163035	-0.444139	-0.0394772	-0.473585	-0.724005	0.113233	2.04601e-07	0.787842	3.89112e-08	9.41583e-14	2		F208A_HUMAN	1e-05	Protein FAM208A
SMED30012113	-1.19968	-1.42206	-0.818534	-0.659376	-0.51471	1.28465e-12	4.23206e-17	5.53585e-07	4.4409e-05	0.00568614	3		ANK1_HUMAN	2e-22	Ankyrin-1
SMED30012118	-0.136787	-0.28851	-0.482242	-0.423688	-0.679665	0.0626073	5.88921e-06	2.74811e-14	1.87697e-11	5.32889e-21	2		KPYM_HUMAN	0	Pyruvate kinase PKM
SMED30012289	-0.306646	-0.497968	-0.523616	-0.541423	-0.772485	0.000477528	2.06172e-09	5.79001e-10	1.078e-10	6.02037e-16	2		DNJC8_RAT	1e-48	DnaJ homolog subfamily C member 8 [Rattus norvegicus]
SMED30012293	0.0928737	-0.05878	-0.181909	-0.381907	-0.584724	0.239059	0.481538	0.00921296	8.2003e-10	5.06666e-17	2		SP16H_MOUSE	0	FACT complex subunit SPT16
SMED30012311	0.301532	-0.199271	-0.35865	-0.882981	-1.82629	0.0238406	0.175963	0.0110292	1.47173e-11	5.80494e-26	2		APEX1_MOUSE	1e-103	DNA-(apurinic or apyrimidinic site) lyase
SMED30012332	0.201562	-0.311177	-2.89698	-3.18916	-3.68426	0.0185701	0.000123306	6.53221e-208	5.44338e-225	3.17093e-181	2		EGR1_DANRE	3e-24	Early growth response protein 1
SMED30012352	-1.36058	-1.52621	-0.241143	-0.368047	-0.0627255	3.09641e-20	3.17977e-22	0.135138	0.0170783	0.7955	3		YHJX_ECOLI	1e-10	Uncharacterized MFS-type transporter YhjX [Escherichia coli K-12]
SMED30012358	-1.22036	-1.54677	-0.501776	-0.606592	-0.578778	1.33001e-38	1.6199e-60	3.21659e-07	2.13783e-10	1.03794e-07	3		CYB5_MOUSE	5e-30	Cytochrome b5 [Mus musculus]
SMED30012387	-1.94841	-2.95794	-0.847627	-1.55391	-0.828615	4.19866e-31	6.69702e-54	3.13662e-08	8.729e-22	5.36728e-06	1		VAMP8_HUMAN	4e-12	Vesicle-associated membrane protein 8
SMED30012421	-0.294833	-0.468866	-0.33507	-0.566708	-0.875214	0.000895363	1.70816e-08	0.000151987	9.37137e-12	7.77912e-21	2		RL43_ASHGO	1e-26	60S ribosomal protein L43 [Ashbya gossypii ATCC 10895]
SMED30012448	-0.90082	-0.7776	-0.403702	-0.353425	-0.0706154	2.25859e-38	2.98207e-29	5.95076e-09	4.80436e-07	0.509603	3		PANK4_PONAB	9e-13	Pantothenate kinase 4
SMED30012451	-1.75418	-3.71182	-0.943628	-1.49935	-1.38478	1.2053e-26	9.69784e-99	2.78403e-08	1.1873e-19	4.38798e-13	1		SAP_HUMAN	1e-06	Prosaposin
SMED30012458	0.241918	-0.106915	-0.463812	-1.27403	-2.72675	0.049992	0.459671	4.98396e-05	3.28203e-31	2.56695e-80	2		IMA1_XENLA	2e-114	Importin subunit alpha-1
SMED30012482	-2.01006	-4.65347	-0.832079	-1.64218	-1.64542	2.5672e-05	7.3769e-14	0.0652192	7.95154e-05	0.000188409	3		S47A2_PONAB	1e-10	Multidrug and toxin extrusion protein 2
SMED30012487	-0.686239	-0.518746	-0.541799	-0.623667	-0.310354	1.736e-29	6.18548e-18	8.548e-19	7.15773e-25	1.12488e-05	1
SMED30012495	-1.6927	-2.21637	-0.615438	-0.748598	0.120961	4.61468e-40	1.56418e-61	8.29312e-08	4.02546e-11	0.460058	3
SMED30012510	0.14394	-0.108873	-0.508917	-0.54445	-0.558673	0.0491846	0.155376	9.54836e-15	6.98168e-17	1.08705e-13	2		EGR1_XENTR	7e-34	Early growth response protein 1
SMED30012548	-0.443373	-0.456184	-0.273238	-0.286748	-0.160755	2.81956e-15	1.82793e-17	1.84874e-06	1.74404e-07	0.0189074	3		PXK_HUMAN	3e-77	PX domain-containing protein kinase-like protein
SMED30012637	-1.5303	-1.71825	-1.23535	-1.59874	-1.52453	7.00166e-42	2.39809e-46	2.77279e-31	1.63115e-41	1.69016e-26	1		YRBE_BACSU	3e-63	Uncharacterized oxidoreductase YrbE [Bacillus subtilis subsp. subtilis str. 168]
SMED30012672	-0.499436	-0.543618	-0.216755	-0.16317	-0.146903	3.26201e-14	4.54703e-17	0.00244172	0.0258317	0.0815273	3		ENTP1_MOUSE	7e-80	Ectonucleoside triphosphate diphosphohydrolase 1
SMED30012696	-0.889236	-0.657651	-0.201128	0.0413666	-0.569335	7.83353e-32	1.81976e-18	0.0136183	0.70834	2.09706e-11	3		C1GLT_CAEEL	3e-88	Glycoprotein-N-acetylgalactosamine 3-beta-galactosyltransferase 1
SMED30012699	0.434856	0.181103	-0.916971	-1.43845	-1.87246	4.79893e-06	0.0952885	1.53094e-19	2.3176e-43	1.48086e-49	2		CLP1_XENLA	4e-30	Polyribonucleotide 5'-hydroxyl-kinase Clp1
SMED30012735	0.318963	0.147969	-0.0867185	-0.901051	-2.23713	0.00287184	0.219928	0.575815	1.47495e-18	9.41343e-64	2
SMED30012767	-1.78685	-2.48214	-2.179	-2.44174	-2.44703	3.24383e-43	2.79752e-77	6.84354e-61	1.4542e-74	4.03091e-55	1	Y
SMED30012784	-1.48194	-2.6225	-0.845786	-1.11849	-0.804577	7.16887e-29	8.98367e-68	3.11535e-11	5.29027e-18	9.77544e-08	1		S14L2_BOVIN	4e-84	SEC14-like protein 2
SMED30012786	-0.710677	-0.728998	0.134334	0.161393	-0.0679696	1.56682e-25	1.95098e-27	0.11085	0.0364767	0.5235	3		SUR1_YEAST	3e-09	Mannosyl phosphorylinositol ceramide synthase SUR1 [Saccharomyces cerevisiae S288c]
SMED30012787	0.0115633	0.0265011	-0.543575	-0.370653	-0.65696	0.909169	0.75688	3.20294e-20	2.85799e-10	1.76593e-22	2		K0319_RAT	2e-16	Dyslexia-associated protein KIAA0319 homolog
SMED30012799	-2.61373	-5.68171	-0.663382	-0.981231	-1.41081	3.56127e-83	4.14104e-126	4.24279e-10	9.53737e-16	1.37759e-23	1		S39A1_BOVIN	3e-35	Zinc transporter ZIP1
SMED30012811	-0.7489	-0.678408	-0.44465	-0.273271	-0.460109	4.10326e-16	8.72982e-14	1.41922e-06	0.0044814	1.22764e-05	3		MFSD9_HUMAN	8e-36	Major facilitator superfamily domain-containing protein 9 [Homo sapiens]
SMED30012819	-0.59552	-0.866519	-0.799994	-0.903928	-1.55187	7.31391e-06	8.65949e-11	1.23918e-09	2.26627e-11	8.34183e-23	2
SMED30012822	0.151137	0.0411318	-0.143091	-0.399111	-0.727016	0.0930767	0.715972	0.130978	2.22667e-07	1.7101e-17	2		ROA1_SCHAM	2e-57	Heterogeneous nuclear ribonucleoprotein A1, A2/B1 homolog [Schistocerca americana]
SMED30012825	-1.18381	-1.04713	-0.387328	-0.580519	0.230691	1.33815e-42	2.35747e-33	1.90707e-05	4.49671e-11	0.0328705	3		CP2A6_HUMAN	3e-79	Cytochrome P450 2A6
SMED30012833	-0.151253	0.0931653	-0.689546	-0.800684	-0.371469	0.249598	0.49095	1.04002e-10	3.05398e-14	0.00374223	2		LIMK1_MOUSE	2e-65	LIM domain kinase 1
SMED30012838	-1.53017	-1.19754	-0.663065	-0.569868	-0.0906496	3.91859e-42	3.33879e-27	2.69641e-10	1.31037e-07	0.595682	3
SMED30012839	0.116728	-0.0379931	-0.275872	-0.585521	-0.595472	0.142975	0.690409	9.46926e-05	1.98789e-18	2.49969e-14	2		AGM1_MOUSE	2e-127	Phosphoacetylglucosamine mutase
SMED30012914	-1.08351	-1.20404	0.222912	0.0374383	0.4836	6.85979e-44	5.06912e-53	0.0101968	0.762207	1.70698e-08	3
SMED30012991	-1.00241	-1.41429	-0.144709	-0.269849	-0.244273	2.03551e-32	8.3174e-63	0.194344	0.00385868	0.0228033	3		EGCSE_CYANO	4e-69	Endoglycoceramidase
SMED30013013	-0.50627	-0.507487	-0.230454	-0.224814	-0.119028	8.94076e-18	3.30247e-18	0.000237813	0.000277062	0.132979	3		GBB_PINFU	2e-111	Guanine nucleotide-binding protein subunit beta
SMED30013053	-1.1527	-1.46586	-0.2866	-0.386203	-0.337528	1.39774e-47	1.43269e-74	0.000645989	1.2408e-06	0.000235656	3		PEX13_BOVIN	8e-12	Peroxisomal membrane protein PEX13
SMED30013060	-0.187414	-0.403535	-0.0507926	-0.173785	-0.152128	0.000536718	2.23255e-16	0.500392	0.00115359	0.0134521	3		TF3B_MOUSE	1e-60	Transcription factor IIIB 90 kDa subunit
SMED30013075	-0.144719	-0.370991	-0.147156	-0.198726	-0.390715	0.00911147	6.60306e-14	0.00908099	0.000160202	5.31862e-12	3		VDAC2_MELGA	1e-48	Voltage-dependent anion-selective channel protein 2
SMED30013124	-0.823333	-1.25303	-0.350394	-0.656173	-0.836085	9.86029e-36	2.30416e-81	4.04909e-07	1.2666e-23	4.77626e-29	1		AL7A1_BOVIN	0	Alpha-aminoadipic semialdehyde dehydrogenase
SMED30013149	-0.523663	-0.694465	-0.12279	-0.404629	-1.4493	4.09754e-06	2.022e-10	0.43603	0.000458462	1.13148e-29	2		MIEAP_DANRE	2e-84	Mitochondria-eating protein
SMED30013155	-3.47457	-5.19386	-1.43806	-1.8473	-1.79019	1.44086e-108	3.55736e-163	9.38467e-26	3.78562e-39	3.64928e-28	1
SMED30013157	-0.0160982	-0.361297	-0.183519	-0.518384	-0.63165	0.869257	6.83866e-11	0.00306952	3.90239e-21	2.27258e-24	2		KHDR2_RAT	2e-28	KH domain-containing, RNA-binding, signal transduction-associated protein 2
SMED30013168	0.036612	0.0126755	-0.332868	-0.46471	-0.768708	0.659467	0.881746	2.48631e-09	8.72783e-18	8.00388e-35	2		CAN_SCHMA	0	Calpain
SMED30013193	-0.595449	-0.730775	-0.454443	-0.496792	-0.529394	9.72894e-23	1.2443e-33	1.12263e-13	3.59028e-16	2.34223e-14	1		SPG20_BOVIN	1e-10	Spartin [Bos taurus]
SMED30013212	0.0536708	-0.217515	-0.196333	-0.66493	-1.18588	0.685042	0.022096	0.054541	5.89765e-15	2.26055e-34	2		H2A4_VOLCA	2e-40	Histone H2A-IV [Volvox carteri]
SMED30013233	-0.0891543	-0.260908	-0.191188	-0.441821	-0.696782	0.31865	0.000213724	0.0129808	9.48252e-11	1.16582e-19	2
SMED30013237	0.387219	0.157875	-0.0732984	-0.638611	-1.20328	1.92606e-05	0.12736	0.600771	3.47712e-12	2.92709e-28	2		ESPL1_HUMAN	2e-31	Separin
SMED30013268	0.0656477	0.160014	-0.539388	-1.1828	-2.88034	0.727913	0.283032	4.82521e-05	6.01412e-18	3.16349e-50	2
SMED30013291	-3.23311	-5.62738	-3.75016	-3.82587	-3.85365	3.5927e-29	8.58525e-45	2.54788e-35	5.12909e-34	3.89691e-24	1		VIAAT_XENTR	5e-42	Vesicular inhibitory amino acid transporter
SMED30013293	-0.251967	-0.232609	-0.264048	-0.24583	-0.410812	1.23233e-07	9.70821e-07	4.06961e-08	2.72155e-07	4.6608e-15	2		MVP_STRPU	0	Major vault protein
SMED30013312	-0.590938	-0.652093	-0.541533	-0.615388	-0.879348	6.53462e-31	7.8403e-38	5.55756e-26	1.93298e-33	7.84221e-50	1		CAN_SCHMA	0	Calpain
SMED30013319	-0.787249	-1.0315	-1.07715	-0.907498	-1.07039	9.56331e-28	4.78167e-47	2.47192e-50	2.69143e-36	2.17283e-38	1	Y	ACBG2_XENLA	0	Long-chain-fatty-acid--CoA ligase ACSBG2
SMED30013331	-1.70067	-3.83679	0.182859	-0.218181	-0.238975	6.60734e-12	5.39551e-35	0.532189	0.4148	0.453396	3
SMED30013396	-1.07613	-1.4808	-0.364404	-0.484602	-0.385937	1.31262e-45	1.04776e-84	8.48191e-06	6.65887e-10	1.95572e-05	3		PLIN5_SHEEP	2e-07	Perilipin-5
SMED30013482	-1.31868	-1.82659	-0.464678	-0.804465	-0.449865	2.80678e-44	4.15183e-80	2.47834e-06	2.05136e-17	5.30585e-05	1
SMED30013484	-0.997487	-1.37974	-0.310669	-0.438277	-0.398669	6.66847e-17	6.214e-31	0.0130505	0.000139792	0.00261436	3		DHDH_XENTR	3e-55	Trans-1,2-dihydrobenzene-1,2-diol dehydrogenase
SMED30013487	-3.03694	-4.17984	-0.852701	-1.4862	-1.07233	1.33819e-75	1.95808e-120	3.17014e-10	6.46704e-29	1.78187e-12	1
SMED30013493	-1.44461	-1.63899	-0.631884	-0.529358	-0.367986	3.98584e-63	1.4603e-79	1.46719e-14	1.08612e-10	0.000137961	1		SC5A9_DANRE	4e-180	Sodium/glucose cotransporter 4
SMED30013497	-0.484563	-0.646376	-0.643073	-0.672271	-0.82315	3.94506e-09	7.72987e-16	4.24615e-15	1.04034e-16	2.17023e-19	1		MRT4_MOUSE	7e-28	mRNA turnover protein 4 homolog
SMED30013511	0.00828316	-1.26038	0.810346	0.217097	0.641873	0.98424	4.38593e-14	7.65382e-07	0.297397	0.000402257	3		KLK13_HUMAN	1e-30	Kallikrein-13
SMED30013541	-0.573151	-0.599754	-0.216485	-0.137014	-0.100929	1.88279e-14	4.72134e-16	0.00788434	0.115254	0.345569	3
SMED30013542	-0.187856	-0.500163	-0.277482	-0.602062	-0.819779	0.0841253	4.96598e-08	0.00671108	5.35416e-11	2.77593e-15	2		RL38_BRABE	2e-35	60S ribosomal protein L38 [Branchiostoma belcheri]
SMED30013591	-0.437693	-0.86036	0.469562	0.446266	0.539743	5.3001e-09	1.11316e-32	4.17867e-10	2.07836e-09	3.12992e-11	3		ALF_ECHMU	2e-177	Fructose-bisphosphate aldolase [Echinococcus multilocularis]
SMED30013592	-3.75597	-6.81093	-2.32242	-3.24316	-3.13677	3.34022e-55	3.24734e-104	8.68188e-26	1.39491e-44	3.10639e-31	1
SMED30013596	0.47508	0.460924	0.00640502	-0.602181	-1.8177	0.00149039	0.00198105	0.984514	0.000420829	5.98428e-18	2		CHD1L_MOUSE	0	Chromodomain-helicase-DNA-binding protein 1-like [Mus musculus]
SMED30013606	-0.234569	-0.353598	-0.260486	-0.386144	-0.529995	0.000489981	2.4932e-08	0.000109928	1.3649e-09	7.98429e-14	2		RL7_CAEEL	2e-83	60S ribosomal protein L7 [Caenorhabditis elegans]
SMED30013699	-0.225907	-0.338198	-0.300891	-0.462147	-0.593066	0.00162287	4.8704e-07	1.68552e-05	3.69371e-12	1.86446e-15	2		RL9_DROME	2e-68	60S ribosomal protein L9 [Drosophila melanogaster]
SMED30013741	-0.823746	-0.765384	-0.554026	-0.559769	-0.34223	3.5897e-15	9.71736e-14	1.58383e-07	7.82306e-08	0.00701044	3		COPT1_PONAB	7e-24	High affinity copper uptake protein 1
SMED30013759	-1.52199	-2.07415	-0.102374	-0.0190122	0.350828	1.19005e-121	8.25587e-204	0.204676	0.855043	3.83557e-07	3		SO1A1_RAT	1e-49	Solute carrier organic anion transporter family member 1A1
SMED30013833	-0.0865905	-0.361463	-0.178256	-0.282696	-0.305196	0.155863	7.27273e-14	0.000854427	1.05223e-08	4.54102e-08	3		THIL_DANRE	5e-151	Acetyl-CoA acetyltransferase, mitochondrial
SMED30013846	-0.926381	-1.26682	-0.335592	-0.423443	-0.270242	1.08597e-31	1.20454e-59	3.30735e-05	2.6785e-08	0.00325727	3		NCEH1_HUMAN	1e-39	Neutral cholesterol ester hydrolase 1
SMED30013885	-1.2139	-1.93635	-2.42116	-2.53907	-2.88838	7.48855e-18	1.94664e-36	2.90539e-53	9.05213e-53	2.82515e-42	1	Y
SMED30013887	-0.695857	-0.901286	-0.293961	-0.474525	-0.154489	2.00248e-12	6.04788e-20	0.00646403	2.37396e-06	0.260773	3		RDHE2_HUMAN	2e-70	Epidermal retinol dehydrogenase 2
SMED30013949	-3.39001	-6.35333	-0.966423	-1.40797	-0.993812	3.72867e-88	1.18085e-176	1.03273e-09	2.58067e-19	4.45755e-08	1
SMED30013960	-3.53357	-4.45122	-1.26766	-1.63629	-1.31757	2.63534e-142	8.24582e-194	3.32167e-24	6.21073e-39	4.25417e-20	1		S39A1_MOUSE	3e-41	Zinc transporter ZIP1
SMED30014017	-0.843667	-0.83319	-2.18845	-2.11052	-2.51242	3.20818e-13	7.68918e-13	2.09816e-72	1.26992e-65	4.00737e-63	2
SMED30014019	-0.186776	-0.315476	-0.360167	-0.388569	-0.98163	0.120617	0.00290589	0.000803207	0.000194557	3.79391e-18	2	Y	IFB1_CAEEL	6e-12	Intermediate filament protein ifb-1
SMED30014032	-0.813661	-0.737655	-0.265948	-0.0530297	-0.150999	3.46105e-30	1.87569e-25	0.000257259	0.592579	0.104397	3
SMED30014036	-0.169543	-0.223289	-0.352636	-0.463073	-0.620518	0.00398074	4.67203e-05	1.18508e-10	4.04689e-18	5.10886e-24	2		PCDAC_PANTR	5e-45	Protocadherin alpha-12
SMED30014037	-0.128	-0.318723	-0.55011	-0.771348	-1.25056	0.439964	0.0181036	1.95643e-05	1.42899e-09	7.02803e-17	2
SMED30014046	0.0511037	0.0624227	-1.03085	-1.73855	-1.99036	0.789437	0.712124	4.35361e-15	3.03515e-35	1.21774e-30	2
SMED30014065	-0.664242	-0.915265	-0.399766	-0.709721	-0.38938	1.52154e-17	3.69507e-32	7.45241e-07	9.63923e-20	2.01147e-05	1		MOT12_HUMAN	6e-08	Monocarboxylate transporter 12
SMED30014067	-1.98619	-2.31556	-1.79479	-1.46211	-0.980564	1.33545e-14	1.29137e-13	2.15657e-13	1.48186e-07	0.00946271	3
SMED30014117	-0.431064	-0.537919	-0.292057	-0.412183	-0.345882	3.59616e-09	2.33321e-14	0.000143735	1.12951e-08	3.05533e-05	3		SEC13_HUMAN	4e-107	Protein SEC13 homolog
SMED30014122	-0.911171	-0.576395	-0.75879	-0.729088	-0.3135	4.1841e-28	3.95635e-12	2.85701e-20	4.19139e-18	0.0018698	1		FUMH_DANRE	7e-165	Fumarate hydratase, mitochondrial
SMED30014128	-1.15516	-1.20769	-0.301294	-0.208115	-0.199904	1.99335e-14	4.71555e-15	0.0539498	0.220839	0.358118	3		GWT1_EMENI	6e-17	GPI-anchored wall transfer protein 1 [Aspergillus nidulans FGSC A4]
SMED30014131	-0.686707	-0.77866	-0.536158	-0.565312	-0.576116	4.49233e-28	1.15186e-34	7.39562e-18	4.59482e-19	6.38087e-16	1		RICTR_HUMAN	1e-28	Rapamycin-insensitive companion of mTOR
SMED30014136	0.465025	0.0544621	-0.35814	-0.82636	-2.01801	0.000391399	0.776506	0.0200679	2.91993e-09	1.46213e-28	2		DCTN1_HUMAN	3e-20	Dynactin subunit 1
SMED30014138	-2.3646	-3.6461	-0.791993	-1.34221	-1.05083	2.14195e-56	1.89967e-100	7.7519e-09	2.14506e-22	5.73964e-11	1		LHX1_CHICK	2e-38	LIM/homeobox protein Lhx1
SMED30014181	-0.657237	-0.920525	-0.091472	-0.277671	-0.336088	1.4351e-18	4.55803e-35	0.35239	0.000231751	5.6755e-05	3		S23A2_XENTR	8e-92	Solute carrier family 23 member 2
SMED30014187	-2.10439	-2.86432	-1.03039	-1.44993	-1.07714	2.16134e-52	3.68585e-87	4.43092e-14	1.75187e-26	5.18461e-12	1		TM144_MOUSE	1e-82	Transmembrane protein 144 [Mus musculus]
SMED30014220	-0.725709	-0.799861	-1.02388	-1.26161	-2.46328	1.1883e-06	1.06968e-07	6.85678e-12	4.10361e-16	2.07097e-33	2
SMED30014224	-2.58933	-3.32078	-1.34718	-1.64489	-1.50196	1.59028e-105	1.20256e-150	3.7765e-36	2.94832e-51	1.66632e-32	1
SMED30014235	-0.95068	-1.06555	-0.46232	-0.339624	-0.249694	3.51957e-37	1.78978e-46	1.60107e-10	2.90059e-06	0.00326181	3		MY88A_XENLA	5e-11	Myeloid differentiation primary response protein MyD88-A
SMED30014241	-0.55827	-1.16713	-0.497157	-0.603492	-0.610765	5.68986e-06	6.22208e-22	6.85825e-05	6.16103e-07	8.7992e-06	3
SMED30014243	-0.847599	-0.945678	-0.475428	-0.771031	-0.434989	3.42647e-22	1.47718e-27	2.52385e-07	2.42398e-18	2.78459e-05	1		ASPP_AEDAE	2e-138	Lysosomal aspartic protease
SMED30014281	-3.34138	-4.02076	-2.09546	-3.20598	-2.68974	2.30864e-16	2.08019e-23	1.99068e-10	2.82642e-19	4.37996e-13	1
SMED30014333	-0.819151	-0.705866	-0.592731	-0.468794	-0.499357	9.31965e-25	1.16895e-17	1.17312e-13	2.26832e-08	1.36503e-07	3		OXDD_PIG	3e-56	D-aspartate oxidase
SMED30014356	-0.0320255	-0.185639	-0.751546	-0.679282	-1.72743	0.88982	0.260964	1.80134e-07	2.03143e-06	4.43162e-22	2		CALL3_RAT	3e-39	Calmodulin-like protein 3 [Rattus norvegicus]
SMED30014360	0.0456156	-0.29303	-0.28908	-0.237876	-0.889134	0.685042	9.11665e-05	0.000200935	0.0023334	1.17939e-27	2		CHDH_RAT	0	Choline dehydrogenase, mitochondrial
SMED30014394	0.144734	-0.132375	-0.509825	-1.0233	-2.26143	0.485223	0.526922	0.00229137	2.4739e-10	2.74374e-25	2		CCNB_DROME	5e-14	G2/mitotic-specific cyclin-B [Drosophila melanogaster]
SMED30014403	-0.742353	-1.05348	-0.357057	-0.426491	-1.32884	1.22546e-09	5.00583e-17	0.00507665	0.000712545	2.11592e-19	1		CSH1_YEAST	1e-17	Mannosyl phosphorylinositol ceramide synthase CSH1
SMED30014417	-0.28323	-0.484576	-0.780781	-1.52394	-2.85541	0.26839	0.033459	0.000392373	1.65061e-11	3.96631e-18	2
SMED30014429	-1.1603	-1.51906	-0.495401	-0.674869	-0.538064	3.43553e-25	7.8403e-38	4.86064e-06	8.68734e-10	2.48953e-05	3		DHB13_MOUSE	1e-46	17-beta-hydroxysteroid dehydrogenase 13
SMED30014446	0.0142614	-0.216083	-0.236152	-0.643064	-1.18354	0.889921	0.000383363	0.000140812	1.26804e-29	1.19223e-73	2		PIWI2_SCHMD	0	Piwi-like protein 2
SMED30014447	-0.0214491	0.0552247	-0.519647	-0.887141	-1.86171	0.930611	0.808303	0.000917347	4.178e-08	3.51931e-20	2
SMED30014459	-0.143687	-0.10639	-0.357475	-0.552545	-0.57853	0.0912802	0.225529	1.39489e-06	1.20951e-14	2.01953e-12	2		BAK_MOUSE	2e-12	Bcl-2 homologous antagonist/killer
SMED30014485	-0.812007	-0.725852	-0.3836	-0.433261	-0.253267	1.44148e-42	4.98951e-35	2.72621e-10	4.26087e-13	0.000337144	3		VAC14_XENLA	6e-124	Protein VAC14 homolog [Xenopus laevis]
SMED30014493	-0.174312	-0.300648	-0.268452	-0.370537	-0.521595	0.0104143	1.21938e-06	3.19826e-05	1.79194e-09	2.48538e-14	2		RL5_STYCL	2e-92	60S ribosomal protein L5 [Styela clava]
SMED30014558	-1.16194	-1.63142	-0.705511	-1.0201	-0.636918	2.21287e-39	1.36079e-75	7.88812e-15	1.57648e-30	5.46884e-10	1
SMED30014572	0.286384	0.230408	-0.510293	-1.33839	-2.61463	0.0468401	0.1249	0.000346077	2.3509e-19	6.42639e-39	2		CDC16_HUMAN	1e-79	Cell division cycle protein 16 homolog
SMED30014639	-1.99369	-2.12597	-0.449323	-0.560383	-1.01938	5.6026e-66	1.2559e-79	2.07678e-05	1.95976e-08	2.20147e-18	1	Y	PANK2_ARATH	2e-05	Pantothenate kinase 2
SMED30014658	-0.950771	-1.23968	-0.46129	-0.516283	-0.535735	1.4855e-36	1.21806e-61	4.28222e-09	1.71287e-11	6.42396e-10	3		NAGK_BOVIN	6e-54	N-acetyl-D-glucosamine kinase
SMED30014667	-3.10008	-3.17375	-1.46014	-1.75677	-1.33575	8.23663e-35	1.13226e-31	8.92082e-12	4.08093e-14	3.16787e-07	1		UBIQ_CAMDR	7e-10	Ubiquitin [Camelus dromedarius]
SMED30014689	-1.79575	-2.22176	-0.850192	-1.13329	-0.849115	5.57193e-46	1.36784e-66	1.14872e-11	6.22301e-20	2.7566e-09	1		Y3950_MYCS2	5e-07	Universal stress protein MSMEG_3950/MSMEI_3859
SMED30014698	-1.2555	-1.59382	-0.38507	-0.43857	-0.225907	2.29802e-32	8.85978e-51	0.000299779	1.67841e-05	0.0724175	3		S38A7_DANRE	5e-64	Putative sodium-coupled neutral amino acid transporter 7
SMED30014700	-2.08214	-4.11104	-0.837742	-1.31144	-1.27929	7.36606e-24	2.1152e-48	2.09952e-06	2.32448e-12	3.10745e-09	3
SMED30014713	-1.74444	-1.99683	-2.41141	-2.73729	-3.71044	2.2726e-42	1.06602e-53	6.9655e-75	3.60476e-91	5.56633e-102	1	Y
SMED30014746	0.362279	-0.0485196	-0.488626	-1.4461	-1.803	0.0539892	0.858533	0.0142582	5.069e-13	4.23243e-15	2		NDC80_MACFA	3e-05	Kinetochore protein NDC80 homolog
SMED30014750	-0.218305	-0.343722	-0.45194	-0.426819	-0.728999	0.000808646	2.23402e-08	2.10797e-13	4.3078e-12	1.48722e-25	2		TRA2A_MOUSE	6e-16	Transformer-2 protein homolog alpha
SMED30014753	-0.594193	-0.719203	-0.105809	-0.020652	-0.295165	3.94062e-17	2.10251e-25	0.250898	0.857317	0.000306434	3		NWD2_HUMAN	3e-60	NACHT and WD repeat domain-containing protein 2
SMED30014803	-1.33605	-1.74278	-0.93399	-0.838122	-0.9643	1.08583e-42	1.36643e-61	1.01565e-23	3.48676e-18	6.52827e-17	1		AOFA_DICDI	1e-47	Probable flavin-containing monoamine oxidase A [Dictyostelium discoideum]
SMED30014808	-0.885476	-1.27262	-0.552293	-0.837369	-0.490873	4.74417e-38	4.11919e-75	1.11819e-15	1.48975e-34	3.03776e-10	1		NRAM2_MOUSE	0	Natural resistance-associated macrophage protein 2
SMED30014813	0.0775845	-0.00583181	-0.27246	-0.573933	-1.29356	0.588088	0.970189	0.014451	9.59232e-09	4.1667e-30	2		YBOXH_APLCA	1e-17	Y-box factor homolog
SMED30014822	-0.64451	-0.913112	-0.304296	-0.461065	-0.376311	1.21913e-41	9.1733e-83	1.14144e-09	1.09179e-21	7.51507e-12	1		MOEH_DROME	7e-172	Moesin/ezrin/radixin homolog 1
SMED30014826	-0.509375	-0.576131	-0.928729	-1.36915	-1.76215	0.00260455	0.000647229	2.26559e-08	5.34057e-14	1.55374e-13	2		ADD2_CAEEL	2e-19	Adducin-related protein 2 [Caenorhabditis elegans]
SMED30014842	-0.149493	-0.0837933	-0.939826	-0.665652	-0.860611	0.326691	0.624397	7.89797e-15	1.41267e-07	3.11574e-09	2		IPHP_NOSCO	5e-10	Tyrosine-protein phosphatase
SMED30014865	-3.22775	-4.64788	-0.825042	-1.61354	-1.09773	2.7348e-33	4.79007e-47	2.41669e-05	7.14284e-15	1.37672e-06	1		TRAF6_BOVIN	2e-10	TNF receptor-associated factor 6
SMED30014876	-0.267398	-0.405556	-3.43707	-4.40741	-5.03903	0.431748	0.176203	2.36557e-39	5.71644e-59	1.8578e-50	2
SMED30014908	-0.600279	-0.633207	-0.185534	-0.246287	-0.218661	5.43958e-15	1.44678e-16	0.0319642	0.00248085	0.0230476	3		S46A3_CHICK	4e-33	Solute carrier family 46 member 3
SMED30014918	-2.30372	-2.88112	-2.40465	-2.55811	-3.05232	1.07759e-117	6.70036e-163	1.73664e-127	2.49403e-136	3.62044e-125	1		DCOR_RAT	1e-39	Ornithine decarboxylase
SMED30014925	-0.336956	-0.627403	-0.826813	-1.23765	-1.90167	0.126585	0.000608014	3.41862e-05	6.81477e-11	3.01024e-15	2		DDX11_MOUSE	1e-140	Probable ATP-dependent RNA helicase DDX11
SMED30014980	-0.129439	-0.206584	-0.282044	-0.522783	-0.824669	0.0507074	0.00052686	1.83815e-06	1.13917e-20	1.73867e-38	2		LAML3_XENLA	3e-69	Lamin-L(III)
SMED30015006	-0.765108	-0.367904	-0.221763	-0.150517	0.00629636	9.38988e-17	9.2194e-05	0.0284765	0.171008	0.970717	3		OCTC_BOVIN	2e-77	Peroxisomal carnitine O-octanoyltransferase
SMED30015010	-0.254296	-0.544584	-0.185371	-0.329011	-0.351299	0.00180524	5.0055e-14	0.0323811	9.62698e-06	2.95232e-05	3
SMED30015020	-0.906903	-0.941976	-0.346129	-0.367189	-0.434501	5.09275e-28	3.86277e-31	8.55495e-05	1.62644e-05	4.56506e-06	3		RF298_ARATH	0.0001	Putative E3 ubiquitin-protein ligase RF298
SMED30015055	-1.90879	-4.75586	-0.678581	-1.41875	-1.07321	8.96688e-52	1.04032e-196	9.26202e-08	2.54945e-30	4.24863e-14	1		SPNS1_DANRE	9e-124	Protein spinster homolog 1
SMED30015090	-0.202918	-0.582252	0.0832373	-0.113476	-0.146132	0.00375995	1.84307e-21	0.336988	0.12575	0.0662361	3		LTBP2_HUMAN	2e-56	Latent-transforming growth factor beta-binding protein 2
SMED30015093	0.101798	-0.187411	-0.476839	-0.856875	-1.23155	0.505468	0.149424	5.157e-05	3.91055e-14	3.34822e-20	2		F120B_BOVIN	5e-07	Constitutive coactivator of peroxisome proliferator-activated receptor gamma
SMED30015105	-0.409429	-0.608235	-0.209399	-0.338343	-0.375798	2.3714e-09	7.0887e-20	0.0044421	6.5445e-07	1.74655e-06	3		SPHK1_HUMAN	4e-47	Sphingosine kinase 1
SMED30015127	-0.546391	-0.608107	-0.164178	0.11721	-0.326027	3.96147e-18	9.655e-23	0.0227028	0.111374	5.9e-06	3		NWD1_HUMAN	2e-12	NACHT domain- and WD repeat-containing protein 1 [Homo sapiens]
SMED30015151	-0.382368	-0.536417	-0.138576	-0.179093	-0.0626678	5.16648e-12	2.66767e-23	0.0322336	0.00262641	0.452786	3		PIPNA_RABIT	1e-103	Phosphatidylinositol transfer protein alpha isoform
SMED30015161	-0.452839	-0.37841	-0.217425	-0.206651	-0.137144	4.08773e-15	6.79305e-11	0.000376134	0.000775006	0.0684636	3		VPS45_RAT	4e-140	Vacuolar protein sorting-associated protein 45
SMED30015185	-0.751692	-1.29332	-0.542082	-0.731998	-0.475029	4.17497e-11	3.75997e-31	5.25618e-06	1.54073e-10	0.000421208	3		ACT5_DIPDE	4e-135	Actin-5, partial [Diphyllobothrium dendriticum]
SMED30015192	-0.856943	-1.06889	-0.414195	-0.574168	-0.893126	2.49127e-20	6.09314e-31	7.85847e-06	2.01106e-10	2.49656e-17	1		UPP_DANRE	6e-85	Uracil phosphoribosyltransferase homolog [Danio rerio]
SMED30015218	-2.10361	-2.37559	-2.23139	-2.59055	-2.75712	3.1416e-86	3.72561e-106	1.35576e-95	5.44377e-121	7.81676e-97	1		MTP_PIG	2e-10	Microsomal triglyceride transfer protein large subunit
SMED30015220	-0.00770319	-0.294771	-0.202715	-0.3968	-0.719308	0.952153	7.41347e-05	0.0120564	7.69076e-08	2.27791e-17	2		PP186_ARATH	5e-05	Pentatricopeptide repeat-containing protein At2g35130 [Arabidopsis thaliana]
SMED30015227	-0.753149	-1.04892	-0.1107	-0.0934453	-0.13366	3.80274e-21	1.06366e-39	0.315166	0.391717	0.234172	3		ELOV4_MACFA	1e-51	Elongation of very long chain fatty acids protein 4
SMED30015244	-2.21511	-5.14875	-0.249086	-0.978018	-1.90057	2.34307e-39	4.87033e-100	0.188909	4.41631e-10	4.94921e-24	1
SMED30015285	0.151624	-0.00317205	-0.233019	-0.767269	-1.53368	0.421513	0.988184	0.206616	6.50314e-07	1.25237e-15	2
SMED30015309	-5.23957	-5.35758	-1.65354	-2.58354	-1.83686	7.76712e-33	1.05163e-36	3.75049e-11	1.9177e-20	2.60528e-09	1
SMED30015310	-1.81722	-2.39897	-1.04979	-1.42296	-1.10315	6.43254e-66	3.50159e-110	6.66577e-23	2.22857e-41	1.14811e-19	1
SMED30015316	-1.26955	-1.61344	-1.10964	-1.74777	-2.40561	4.1896e-19	2.33291e-28	6.48503e-16	1.29094e-31	1.4063e-34	1		CDC42_BOVIN	1e-50	Cell division control protein 42 homolog
SMED30015322	-1.71314	-2.53951	0.0840656	-0.544172	-0.498116	2.16013e-07	1.05523e-16	0.847752	0.0372825	0.178328	3
SMED30015328	-0.984993	-1.24164	-1.8735	-2.19181	-2.84434	6.25415e-09	4.02368e-13	6.11903e-28	1.16324e-34	1.33027e-38	2
SMED30015359	-2.19177	-2.96941	-0.983127	-1.30114	-1.3726	5.01668e-107	1.62689e-162	1.79592e-26	9.59461e-43	1.87706e-34	1		UBP30_XENTR	2e-13	Ubiquitin carboxyl-terminal hydrolase 30
SMED30015362	-0.325076	-0.382284	-1.41529	-1.65535	-1.86875	0.00442509	0.000472406	1.4355e-42	2.39121e-57	3.09949e-53	2
SMED30015364	-0.917123	-0.137632	-1.32379	-1.43768	-1.03737	7.07035e-13	0.407915	1.06698e-24	3.78363e-28	1.09064e-11	2		PA2_APICC	6e-22	Phospholipase A2
SMED30015414	-1.11314	-1.38027	-0.351527	-0.364729	-0.154517	2.27391e-18	4.13934e-24	0.00821263	0.00782631	0.406037	3		MTH2_DROYA	1e-11	G-protein coupled receptor Mth2
SMED30015484	-0.5961	-0.798045	-0.223716	-0.237079	-0.00780463	2.12959e-08	6.98214e-15	0.0612528	0.0344817	0.968502	3		XYLB_HUMAN	5e-105	Xylulose kinase
SMED30015566	-1.77637	-3.83915	-0.0298194	-0.32617	-0.121133	3.19644e-42	2.06533e-149	0.904301	0.027284	0.556447	3		PLB1_RAT	3e-65	Phospholipase B1, membrane-associated
SMED30015649	-0.671757	-1.20373	-0.0162681	-0.180079	-1.03971	3.44555e-08	6.93422e-23	0.940639	0.194371	6.0156e-14	1		ACH1_SCHGR	2e-112	Acetylcholine receptor subunit alpha-L1
SMED30015672	0.076339	0.0121545	-0.446752	-0.568798	-0.837112	0.416033	0.914603	1.74361e-10	1.59985e-16	1.40556e-26	2		GELS1_LUMTE	9e-107	Gelsolin-like protein 1
SMED30015678	0.127542	0.0799361	-0.553221	-0.997798	-2.29215	0.630566	0.776834	0.0084142	2.88081e-06	2.68664e-14	2		CKS2_XENLA	8e-33	Cyclin-dependent kinases regulatory subunit 2
SMED30015686	0.228968	0.147972	-0.0522834	-0.533745	-1.1414	0.00662472	0.100057	0.679159	8.89379e-12	3.41136e-37	2		PO210_HUMAN	9e-113	Nuclear pore membrane glycoprotein 210
SMED30015687	0.0587981	-0.313577	-0.529613	-1.17207	-2.56403	0.846609	0.163183	0.0124231	1.35617e-08	4.25417e-20	2	Y	RNF8_BOVIN	7e-11	E3 ubiquitin-protein ligase RNF8
SMED30015739	-0.531327	-0.619291	-0.374949	-0.319245	-0.513938	9.08543e-14	1.48679e-18	4.47365e-07	1.79572e-05	2.66317e-10	3		A1A1A_DANRE	1e-92	Alcohol dehydrogenase [NADP(+)] A
SMED30015780	-0.307999	-0.482796	0.10526	-0.219948	-0.0260063	1.71435e-06	6.99674e-15	0.17932	0.00089914	0.820767	3		S39A7_MOUSE	2e-60	Zinc transporter SLC39A7
SMED30015783	-0.973675	-1.24433	-0.917079	-1.0531	-0.994805	9.50027e-39	1.79658e-60	1.29054e-34	3.63224e-44	1.60438e-30	1		SOAT1_CHLAE	3e-88	Sterol O-acyltransferase 1
SMED30015789	-0.0972974	0.031696	-0.37106	-1.12612	-2.49074	0.735411	0.914146	0.102287	1.23246e-07	5.75453e-17	2
SMED30015795	-3.20402	-5.3291	-1.52872	-2.11235	-1.93658	3.31701e-127	1.22861e-200	8.00024e-43	8.24979e-70	2.33668e-45	1
SMED30015802	-0.948302	-1.04275	-0.503653	-0.501984	-0.334628	1.14777e-24	2.85336e-30	7.26178e-08	4.43565e-08	0.00166838	3		T3HPD_SACKO	3e-70	Trans-L-3-hydroxyproline dehydratase
SMED30015825	-0.664658	-0.582865	-0.657283	-0.896415	-1.03821	1.48949e-18	8.09832e-15	4.64301e-18	4.1285e-32	1.56693e-30	1		SUR1_YEAST	9e-21	Mannosyl phosphorylinositol ceramide synthase SUR1 [Saccharomyces cerevisiae S288c]
SMED30015831	-1.1726	-1.99738	-0.401752	-0.649585	-0.411578	5.49086e-42	3.62259e-108	1.094e-05	1.64814e-13	6.92458e-05	3		PAPL_DANRE	7e-127	Iron/zinc purple acid phosphatase-like protein
SMED30015896	-0.764231	-0.973153	0.186472	0.331052	0.0547303	1.55732e-19	3.75508e-30	0.051611	8.1017e-05	0.691822	3
SMED30015925	-3.16915	-4.57876	-1.4521	-1.80622	-1.98071	7.96271e-47	2.24822e-61	2.6005e-15	7.01581e-20	1.37995e-16	1		MFSD7_DANRE	4e-61	Major facilitator superfamily domain-containing protein 7 [Danio rerio]
SMED30015938	-0.382651	-0.630515	-0.176309	-0.245097	-0.260235	1.87206e-08	3.67828e-22	0.0220878	0.000462035	0.000831324	3		REH1_YEAST	5e-21	Cytoplasmic 60S subunit biogenesis factor REH1
SMED30015978	-1.85252	-2.09658	-1.13716	-0.927812	-0.969916	3.18566e-15	9.83059e-19	1.33022e-07	1.11576e-05	0.000332591	3		YHJX_ECOLI	4e-09	Uncharacterized MFS-type transporter YhjX [Escherichia coli K-12]
SMED30015999	0.683912	0.519996	0.14138	-0.593933	-1.43637	9.43683e-08	4.41893e-05	0.467169	5.32333e-05	1.83308e-15	2		AUKBB_XENLA	1e-100	Aurora kinase B-B
SMED30016009	0.0298876	-0.106619	-0.231268	-0.4662	-0.726503	0.803115	0.241415	0.00436651	4.09815e-10	1.19933e-17	2		TDRD1_HUMAN	1e-05	Tudor domain-containing protein 1
SMED30016076	-1.12356	-1.71661	0.0435973	0.338288	-0.0657861	4.5568e-20	3.48524e-40	0.838672	0.00993816	0.749772	3		ST1B1_CHICK	1e-45	Sulfotransferase family cytosolic 1B member 1
SMED30016089	-1.41723	-0.974489	-0.279239	-0.118218	-0.25338	5.13897e-40	2.74863e-22	0.008776	0.339292	0.0408419	3
SMED30016101	-1.21381	-2.219	-0.512956	-0.908349	-0.296502	1.90364e-22	5.46756e-56	2.53043e-05	1.21526e-13	0.0495707	3
SMED30016104	-1.72819	-2.10445	-0.558042	-0.13591	-1.24666	6.11613e-45	3.33845e-61	2.27671e-06	0.362667	3.67781e-21	1		GCYB2_RAT	2e-95	Guanylate cyclase soluble subunit beta-2
SMED30016114	0.00732201	0.0349357	-0.368292	-0.330226	-0.313077	0.9311	0.609743	2.13539e-14	6.37116e-12	9.30275e-09	2		AASS_BOVIN	0	Alpha-aminoadipic semialdehyde synthase, mitochondrial
SMED30016119	-2.38496	-2.68536	-2.42075	-2.38435	-2.09816	8.1772e-28	4.15515e-35	3.50604e-29	9.44742e-30	2.03898e-18	1
SMED30016134	-0.969264	-0.941276	-0.528248	-0.580921	-0.329651	4.34713e-25	5.03354e-24	2.32558e-08	6.07989e-10	0.00320835	3
SMED30016150	-0.42003	-0.375075	-0.33533	-0.189786	-0.216361	4.61479e-14	1.3404e-11	3.58903e-09	0.00145382	0.00103791	3		RUFY2_PONAB	2e-82	RUN and FYVE domain-containing protein 2 [Pongo abelii]
SMED30016163	-0.270718	-0.378685	-0.335302	-0.512709	-0.600144	0.000319221	1.17812e-07	6.42864e-06	4.62079e-13	5.70211e-14	2		RL27A_XENLA	6e-56	60S ribosomal protein L27a
SMED30016181	0.32696	0.20645	-0.123152	-0.555607	-1.36751	0.0410938	0.230167	0.575984	0.000399618	4.49715e-14	2		PRC1_MOUSE	7e-17	Protein regulator of cytokinesis 1 [Mus musculus]
SMED30016200	-1.24457	-1.85729	-0.257386	-0.426937	-0.20103	1.33647e-25	2.63777e-49	0.0554073	0.000452481	0.201018	3
SMED30016201	-0.407069	-0.51968	-0.321153	-0.475421	-0.307736	2.48855e-09	6.56128e-15	5.99657e-06	2.2238e-12	0.000103552	3		VATL_RAT	2e-62	V-type proton ATPase 16 kDa proteolipid subunit
SMED30016227	-0.115149	-0.599068	-0.877098	-1.36044	-2.93951	0.431898	3.74167e-08	6.08442e-15	1.86619e-32	2.52951e-75	2		ERC6L_BOVIN	7e-169	DNA excision repair protein ERCC-6-like
SMED30016250	-2.75437	-4.44336	-5.52529	-4.4616	-4.00409	3.13572e-08	8.73953e-12	7.41953e-15	1.11403e-11	1.39836e-08	2
SMED30016254	-1.37553	-1.64772	-0.460763	-0.741761	-0.745939	6.34804e-57	1.48308e-77	5.83108e-08	8.03765e-19	1.015e-14	1		CL066_HUMAN	1e-22	UPF0536 protein C12orf66 [Homo sapiens]
SMED30016274	-0.899781	-1.05189	-0.633446	-0.60822	-1.00252	3.8881e-10	3.28089e-14	8.74147e-06	9.77592e-06	1.48792e-09	3		GAPR1_MOUSE	1e-25	Golgi-associated plant pathogenesis-related protein 1
SMED30016304	-3.66087	-7.31901	-0.937656	-1.84876	-1.76004	1.46424e-11	8.61431e-18	0.0153267	4.2247e-06	0.000607053	3
SMED30016315	-0.193339	-0.168426	-0.362122	-0.391208	-0.354226	0.000788971	0.00218564	2.90925e-11	8.79607e-14	4.66613e-09	2		DDR1_RAT	4e-35	Epithelial discoidin domain-containing receptor 1
SMED30016340	-1.15225	-1.43712	-0.651369	-0.728572	-0.624656	9.82729e-67	1.84536e-100	4.31097e-23	1.23118e-28	1.36331e-16	1		RAC1_RAT	8e-87	Ras-related C3 botulinum toxin substrate 1
SMED30016369	-1.22332	-1.33262	0.154272	-0.23284	-0.864214	1.33551e-10	2.94687e-14	0.521926	0.246596	3.46601e-05	3
SMED30016382	-2.89747	-2.34318	-2.74546	-2.8168	-3.058	1.27598e-84	9.43634e-56	2.38315e-81	5.19949e-71	9.266e-56	1	Y
SMED30016428	-1.80025	-2.39798	-0.500596	-0.952333	-0.532382	8.342e-15	1.72448e-26	0.0235863	7.45399e-07	0.0288525	3		ANK3_MOUSE	1e-20	Ankyrin-3
SMED30016464	-3.15551	-3.62926	-0.804866	-1.12419	-1.3624	9.40581e-165	3.29375e-184	1.41797e-17	7.72555e-31	8.26089e-32	1	Y	CP3AO_SHEEP	4e-75	Cytochrome P450 3A24
SMED30016469	-0.843819	-1.26053	-0.0966804	-0.305204	-0.282774	3.3829e-08	9.2764e-16	0.662774	0.0673118	0.127036	3
SMED30016551	-1.53701	-2.58996	-0.655549	-1.14431	-0.829281	3.96961e-51	3.25483e-132	5.41175e-10	5.4573e-29	2.13487e-12	1
SMED30016571	-0.256164	-0.550349	0.0299646	-0.353331	-0.303465	0.000116879	3.11365e-19	0.783882	2.05541e-08	3.2522e-05	3		THOP1_HUMAN	0	Thimet oligopeptidase
SMED30016591	0.295385	0.16966	-0.905396	-1.49695	-1.9506	0.00351858	0.137467	3.29388e-19	1.19084e-42	7.25024e-48	2		BRO_DROME	4e-24	Protein brother [Drosophila melanogaster]
SMED30016659	-2.44533	-3.19335	-2.91738	-3.26523	-3.70419	7.09405e-68	5.44341e-94	1.13437e-88	3.1537e-96	8.47883e-65	1		ORCT_DROME	1e-09	Organic cation transporter protein [Drosophila melanogaster]
SMED30016682	-0.262534	-0.428581	-0.296481	-0.300653	-0.383967	2.3402e-06	6.03948e-16	1.00987e-07	3.82394e-08	2.60227e-10	3		FKBP8_HUMAN	2e-51	Peptidyl-prolyl cis-trans isomerase FKBP8
SMED30016689	-0.446675	-0.511338	-0.361232	-0.273302	-0.247546	8.89763e-12	4.59492e-16	5.17249e-08	3.00195e-05	0.000985568	3		AAMP_CANFA	3e-14	Angio-associated migratory cell protein [Canis lupus familiaris]
SMED30016695	-3.10414	-7.31648	-0.961251	-1.60025	-1.0439	2.5028e-68	2.16834e-176	1.25228e-08	5.62341e-22	4.28819e-08	1		CJ011_MOUSE	2e-14	Leucine-rich repeat-containing protein C10orf11 homolog [Mus musculus]
SMED30016711	-0.935599	-0.874543	-0.442218	-0.391678	-0.351296	2.36946e-27	2.33665e-23	4.66553e-07	1.3289e-05	0.000680105	3		TRC_DROPS	0	Serine/threonine-protein kinase tricorner
SMED30016739	-0.242504	-0.447257	-0.423024	-0.632804	-0.587092	0.000605702	6.60864e-12	3.92989e-10	5.34247e-22	1.97493e-14	2		SYSC_BOVIN	9e-180	Serine--tRNA ligase, cytoplasmic
SMED30016769	-0.984823	-1.44289	-0.608068	-0.626026	-0.553688	5.67574e-65	1.21341e-129	1.79327e-26	6.83209e-28	1.62846e-17	1		BDLP_NOSP7	2e-07	Bacterial dynamin-like protein
SMED30016800	-2.133	-2.3931	-1.60587	-1.47005	-1.14889	1.79189e-27	5.6706e-30	1.7429e-19	1.56624e-15	1.66106e-07	1		HSP70_ECHGR	8e-130	Heat shock cognate 70 kDa protein
SMED30016829	-2.55137	-4.27769	-0.960209	-1.39137	-1.12353	2.61198e-92	1.46929e-203	2.73753e-15	5.39216e-31	3.97267e-16	1		MRP1_CHICK	0	Multidrug resistance-associated protein 1
SMED30016848	-1.3363	-1.8712	-0.98148	-0.864282	-0.857762	1.20935e-22	1.66913e-40	2.3138e-13	6.47917e-11	3.82463e-09	3
SMED30016886	-0.266069	-0.543278	-0.287929	-0.647633	-0.898046	0.00019918	3.80851e-16	5.55097e-05	6.35226e-22	2.07249e-31	1
SMED30016897	-0.128824	-0.132457	-0.493994	-0.454587	-0.41136	0.074593	0.0621076	8.84319e-16	3.25417e-13	8.47644e-09	2
SMED30016902	-0.817972	-0.91271	-0.492317	-0.392909	-0.536794	8.26381e-33	3.21264e-41	1.59098e-12	1.62208e-08	6.80466e-12	3		TTPAL_HUMAN	2e-24	Alpha-tocopherol transfer protein-like [Homo sapiens]
SMED30016943	-1.26942	-3.48963	-0.692298	-1.22673	-0.576483	2.56919e-18	5.83306e-104	4.92079e-06	2.58843e-17	0.000815533	1		S15A4_XENLA	1e-72	Solute carrier family 15 member 4
SMED30016967	-0.581116	-0.189078	-0.515011	-0.349291	-0.31214	1.19444e-19	0.0070333	8.25098e-16	1.66683e-07	8.08224e-05	1		CAMT2_DICDI	4e-50	Probable caffeoyl-CoA O-methyltransferase 2
SMED30016991	-0.495856	-0.390129	-0.265557	-0.217957	-0.116053	1.8175e-14	1.94235e-09	8.17352e-05	0.00159014	0.199926	3		AIDB_ECOLI	1e-45	Putative acyl-CoA dehydrogenase AidB [Escherichia coli K-12]
SMED30016995	-0.270878	-0.320651	-0.372101	-0.332398	-0.557914	6.97073e-05	1.24119e-06	2.43043e-08	6.3613e-07	4.15305e-14	2		TRA2B_RAT	2e-35	Transformer-2 protein homolog beta
SMED30017013	-0.67012	-0.601818	-0.446191	-0.334773	-0.188214	2.76803e-14	1.08922e-11	8.23855e-07	0.000323569	0.107343	3		VAMP3_MACFA	4e-15	Vesicle-associated membrane protein 3
SMED30017026	-1.74513	-2.10986	-0.492905	-0.347428	0.15268	1.64757e-64	1.74728e-86	9.45103e-07	0.000790536	0.253615	3		UBP3_HUMAN	0.0004	Ubiquitin carboxyl-terminal hydrolase 3
SMED30017038	-1.58408	-2.2217	-1.0413	-1.1343	-0.910763	4.8405e-32	1.57693e-55	2.79172e-16	3.16153e-19	1.27791e-10	1		MYCT_MOUSE	8e-53	Proton myo-inositol cotransporter
SMED30017131	0.0168748	-0.423164	-0.305752	-1.03649	-2.15546	0.952002	0.0140433	0.119209	1.00337e-09	1.11999e-19	2		TOB1A_XENLA	7e-33	DNA topoisomerase 2-binding protein 1-A
SMED30017132	-1.92018	-3.83007	-1.1828	-1.40664	-0.645341	3.11663e-08	4.23811e-17	0.000253364	2.78114e-05	0.097052	3
SMED30017146	0.253199	0.179078	-0.368074	-0.467676	-0.655212	0.00159824	0.030795	3.14375e-06	6.93103e-10	2.75932e-14	2		ZFH2_DROME	5e-26	Zinc finger protein 2
SMED30017153	-2.19833	-3.53647	-0.751932	-1.13789	-0.823934	2.07526e-36	1.67941e-71	5.30746e-06	1.75251e-12	7.2146e-06	3		TM56A_XENLA	3e-29	Transmembrane protein 56-A [Xenopus laevis]
SMED30017154	-0.0800498	-0.00254102	-0.432522	-0.747624	-0.859247	0.521919	0.985301	3.34581e-06	1.56624e-15	1.37285e-15	2		PRP4_PONAB	1e-149	U4/U6 small nuclear ribonucleoprotein Prp4
SMED30017194	-0.0718704	-0.296371	-0.413994	-0.925758	-0.938243	0.542934	0.00023221	2.03471e-06	9.81713e-29	1.22668e-19	2		ZN106_HUMAN	1e-13	Zinc finger protein 106
SMED30017200	-0.472233	-0.841705	-0.351163	-0.452624	-0.43693	1.45941e-13	1.10701e-40	9.42228e-08	1.66605e-12	2.18354e-09	3		BPNT1_BOVIN	6e-77	3'(2'),5'-bisphosphate nucleotidase 1
SMED30017206	-0.326498	-0.320532	-0.494775	-0.39202	-0.538428	3.64341e-12	6.21774e-12	1.44085e-26	4.55436e-17	1.03915e-24	2		E41L2_HUMAN	1e-70	Band 4.1-like protein 2
SMED30017222	0.266444	0.0720764	-0.106797	-0.44117	-1.11891	0.00841877	0.586083	0.42202	7.39509e-06	1.45682e-22	2		H2AV_DROME	5e-57	Histone H2A.v
SMED30017226	-0.748764	-0.855864	0.0705558	-0.0484477	-0.464024	5.1269e-20	1.8614e-27	0.558705	0.683465	4.48753e-07	3
SMED30017227	-0.653573	-0.595732	-0.827435	-0.967663	-0.942907	1.7743e-15	5.31287e-13	6.85786e-24	4.32742e-30	2.53975e-21	1		PEX12_CAEEL	5e-25	Putative peroxisome assembly protein 12
SMED30017236	-2.21146	-3.1668	-0.787834	-1.19858	-1.06542	4.70292e-50	4.56613e-81	1.16281e-08	8.27207e-18	3.12843e-11	1	Y	TRAF6_RAT	1e-06	TNF receptor-associated factor 6
SMED30017243	-1.31215	-1.69211	-0.549879	-0.810208	-0.633685	3.21197e-67	8.90677e-108	2.16425e-13	3.69175e-28	5.07743e-14	1		ATHL1_HUMAN	3e-105	Acid trehalase-like protein 1 [Homo sapiens]
SMED30017260	-0.280812	-0.661136	-0.318486	-0.561465	-0.522196	2.9037e-06	7.73773e-32	1.15428e-07	6.53553e-23	8.03227e-16	1		PRP6_MOUSE	0	Pre-mRNA-processing factor 6
SMED30017264	-0.396659	-0.591969	0.475005	0.505951	0.569268	5.90141e-11	6.3779e-24	9.00609e-16	2.79609e-18	3.4189e-19	3
SMED30017330	-1.07454	-1.08781	-0.522706	-0.357794	-0.329465	4.69502e-23	2.64125e-23	2.2733e-06	0.0018338	0.0135804	3		PITH1_DROME	1e-42	PITH domain-containing protein CG6153 [Drosophila melanogaster]
SMED30017359	-1.45027	-2.07014	-1.3716	-2.2688	-3.51356	4.13509e-14	2.56584e-20	1.53522e-13	1.43805e-22	4.57686e-21	1
SMED30017368	-0.128851	-0.566592	-0.309122	-0.740746	-0.862797	0.311448	1.81201e-09	0.00405515	8.58197e-15	1.62154e-14	2		DPH7_DICDI	3e-36	Diphthine methyltransferase homolog
SMED30017412	-1.68405	-2.24477	-1.03295	-0.914765	-0.739554	1.22742e-31	1.29172e-39	1.30308e-14	5.58539e-10	2.06222e-05	1		CP2F2_RAT	2e-75	Cytochrome P450 2F2
SMED30017448	0.897303	0.58701	-0.522134	-1.20249	-2.05254	4.25663e-19	1.14694e-08	4.96793e-06	6.52628e-27	2.14755e-47	2		HSP70_ONCTS	0	Heat shock 70 kDa protein
SMED30017487	-4.41338	-7.45892	-2.24726	-3.05438	-3.18782	1.43022e-96	2.5334e-156	1.86872e-34	1.93612e-57	1.04769e-44	1		WHITE_CERCA	2e-120	Protein white [Ceratitis capitata]
SMED30017502	0.386242	0.0262823	-0.670348	-1.31307	-1.79702	0.000295186	0.868611	9.68832e-09	7.12086e-29	1.88422e-34	2		SC6A9_XENLA	1e-156	Sodium- and chloride-dependent glycine transporter 1
SMED30017534	-0.169648	-0.378358	-0.081158	-0.205903	-0.176057	0.00262554	4.126e-14	0.231729	9.74748e-05	0.00381572	3		TTC5_HUMAN	5e-84	Tetratricopeptide repeat protein 5
SMED30017552	0.164319	-0.13561	-0.0588381	-0.466464	-0.415483	0.0170045	0.046402	0.528322	1.47134e-14	3.32711e-09	2		CSTF3_HUMAN	0	Cleavage stimulation factor subunit 3
SMED30017554	-3.58084	-5.29292	-2.8799	-3.667	-3.21098	1.50928e-61	1.06927e-105	6.8843e-43	4.34482e-63	7.30582e-37	1		FRI_PACLE	1e-22	Ferritin [Pacifastacus leniusculus]
SMED30017557	-0.755646	-0.60415	-0.105137	0.0460968	-0.189024	2.15723e-17	5.98653e-12	0.374377	0.724171	0.100469	3		AT8A1_MOUSE	2e-104	Phospholipid-transporting ATPase IA
SMED30017561	-2.57392	-3.11562	-1.59938	-1.79399	-1.57789	2.46596e-09	2.49794e-14	4.7847e-05	5.71555e-07	0.00029415	3
SMED30017626	-1.4571	-3.7723	-0.130775	-0.503903	-0.0277064	1.94053e-23	6.7764e-93	0.533641	0.000991677	0.917902	3		PI16_MOUSE	8e-19	Peptidase inhibitor 16
SMED30017670	-0.113416	-0.324227	-0.190785	-0.39873	-0.658152	0.147446	3.63113e-07	0.00754737	3.67436e-10	1.32639e-20	2		NTM1A_DANRE	7e-64	N-terminal Xaa-Pro-Lys N-methyltransferase 1
SMED30017698	-0.394989	-0.629108	-0.210849	-0.338098	-0.44107	1.5352e-06	2.13022e-15	0.0196778	3.9831e-05	3.14325e-06	3		MSRB_THEEB	4e-49	Peptide methionine sulfoxide reductase MsrB
SMED30017702	0.293056	0.480325	-0.594316	-0.286052	-1.10658	0.0137701	4.6089e-06	1.17106e-06	0.0280084	1.91147e-14	2
SMED30017727	-0.345539	-0.447232	0.0379475	0.0931314	0.217034	4.21508e-11	5.16059e-19	0.638698	0.120002	0.000188924	3		CAN5_MOUSE	6e-40	Calpain-5
SMED30017746	-1.38604	-2.53217	-2.54578	-3.43095	-3.88675	6.86397e-06	2.62142e-13	4.07425e-13	9.37703e-18	3.47535e-12	2
SMED30017792	-1.60468	-2.68516	-0.610643	-0.927356	-0.573329	8.09861e-40	3.96089e-85	2.1629e-07	3.69859e-15	3.76387e-05	1
SMED30017818	-0.449155	-0.440643	-0.39564	-0.272574	-0.261389	2.11837e-17	5.73764e-17	7.20439e-14	4.39091e-07	1.36966e-05	1		FIG4_HUMAN	7e-132	Polyphosphoinositide phosphatase
SMED30017847	-0.674537	-0.852959	-0.617159	-0.67246	-0.755216	4.87784e-35	2.41004e-55	2.08176e-29	8.60285e-35	9.81668e-34	1		DUSTY_RAT	8e-53	Dual serine/threonine and tyrosine protein kinase
SMED30017870	-0.628573	-0.497085	-0.263342	-0.24459	-0.382741	2.2824e-21	7.32351e-14	0.000170955	0.00051473	8.80251e-07	3
SMED30017872	-1.8356	-2.15165	-0.582613	-1.03074	-0.885295	1.52048e-41	5.80671e-56	1.65256e-06	9.50458e-18	1.29117e-10	1		M3K3_HUMAN	4e-14	Mitogen-activated protein kinase kinase kinase 3
SMED30017903	0.264577	-0.00460429	-0.466224	-1.10732	-2.4505	0.154523	0.98467	0.00900385	3.91646e-11	1.30521e-28	2		TIM_HUMAN	6e-91	Protein timeless homolog
SMED30017928	-0.20416	-0.428798	-0.660486	-0.935738	-1.28291	0.130115	0.000413545	1.78098e-08	3.05177e-14	1.44738e-17	2
SMED30017941	-0.161461	-0.390038	-0.219252	-0.365726	-0.469006	0.000749536	4.12367e-19	2.5849e-06	1.32247e-16	3.50241e-21	1		CLU_XENTR	0	Clustered mitochondria protein homolog [Xenopus (Silurana) tropicalis]
SMED30018050	-1.27824	-1.81924	-0.546919	-1.06632	-0.791495	9.54822e-26	4.90372e-44	5.31838e-06	3.74723e-18	3.93596e-08	1		Y1319_METJA	5e-23	Uncharacterized sodium-dependent transporter MJ1319 [Methanocaldococcus jannaschii DSM 2661]
SMED30018067	-0.84645	-0.586248	-0.218599	0.231148	0.421736	1.79538e-20	2.16183e-11	0.028439	0.010186	2.64977e-06	3		ATL3_HUMAN	8e-20	ADAMTS-like protein 3
SMED30018088	-0.932613	-0.573655	-2.71782	-2.66868	-1.52986	3.446e-17	5.76888e-07	2.39659e-104	1.22259e-90	1.17084e-27	1
SMED30018096	-1.38914	-1.70287	-0.742043	-0.613637	-0.779757	4.08986e-47	3.8673e-61	3.69018e-15	4.60433e-10	5.07486e-12	1		UK114_HUMAN	6e-55	Ribonuclease UK114
SMED30018127	-1.61887	-2.91099	-0.0802058	-0.378421	-0.442765	2.4636e-22	1.15776e-57	0.724706	0.00982132	0.00965361	3
SMED30018138	-0.755509	-0.836766	-0.33411	-0.369566	-0.466969	4.69159e-28	4.11086e-35	2.75502e-06	8.84419e-08	2.08598e-09	3		ANR52_DANRE	1e-10	Serine/threonine-protein phosphatase 6 regulatory ankyrin repeat subunit C
SMED30018167	-1.35246	-1.74519	0.297758	0.387987	0.621811	1.01829e-73	1.75617e-112	2.72206e-05	1.24457e-08	2.00387e-17	3		HUTI_NEMVE	4e-147	Probable imidazolonepropionase
SMED30018188	-0.504068	-0.506716	-0.295015	-0.291647	-0.0942672	7.40391e-15	2.36144e-15	1.51641e-05	1.32731e-05	0.307682	3		LAMP1_CHICK	3e-11	Lysosome-associated membrane glycoprotein 1
SMED30018210	0.251972	0.097854	-0.368351	-0.808358	-1.61337	0.0601934	0.540944	0.00459273	1.43131e-11	8.66017e-30	2
SMED30018240	0.177522	-0.166095	-0.704591	-1.2289	-2.39096	0.356702	0.394095	1.51476e-05	9.79782e-14	6.3218e-27	2		RFX5_MOUSE	3e-28	DNA-binding protein Rfx5
SMED30018252	-2.17706	-3.13053	-0.905871	-1.52319	-1.04956	9.27087e-56	1.06922e-106	1.39811e-10	1.66735e-28	4.03999e-11	1	Y	CYSP2_HOMAM	9e-117	Digestive cysteine proteinase 2
SMED30018297	0.337805	0.560971	-0.183364	-0.494717	-0.860416	0.000126231	1.32289e-11	0.0733356	8.24191e-09	3.82418e-19	2		DYL1_CHLRE	2e-13	Dynein 8 kDa light chain, flagellar outer arm [Chlamydomonas reinhardtii]
SMED30018334	-0.614462	-0.514012	-0.544602	-0.640779	-0.877149	3.34685e-16	1.55389e-11	5.90555e-13	8.00594e-17	3.56571e-22	1
SMED30018338	-1.21427	-1.47238	-0.691938	-0.918428	-0.676606	1.32786e-19	2.63274e-26	1.56724e-07	8.20894e-12	1.26065e-05	3		S17A5_HUMAN	6e-78	Sialin
SMED30018351	-1.55797	-0.909708	-0.681057	-0.631154	-0.666104	1.989e-31	2.99043e-12	1.94664e-07	1.96798e-06	1.32828e-05	3
SMED30018353	-1.93134	-2.20557	-2.06143	-2.33648	-2.76461	1.38296e-90	6.12888e-116	9.23009e-102	2.28122e-127	6.20207e-121	1	Y	GATM_MOUSE	5e-124	Glycine amidinotransferase, mitochondrial
SMED30018359	-0.266224	-0.487636	-0.120746	-0.0586898	-0.0539771	3.80685e-05	1.00242e-15	0.109709	0.485406	0.578344	3		F26_LITCT	0	6-phosphofructo-2-kinase/fructose-2,6-bisphosphatase
SMED30018395	0.214814	-0.168443	-0.540337	-1.30266	-2.30054	0.281112	0.407882	0.00199039	2.82608e-15	6.22853e-25	2		WDHD1_XENLA	2e-15	WD repeat and HMG-box DNA-binding protein 1
SMED30018404	-0.578226	-0.67936	-0.381221	-0.330723	-0.0519971	1.30134e-16	1.35869e-22	9.38287e-08	3.86007e-06	0.649056	3
SMED30018460	-0.898979	-1.18002	-0.579693	-0.648127	-0.718775	5.25457e-35	3.64114e-60	2.83478e-15	1.97682e-19	1.36833e-18	1		CHM2B_CHICK	7e-42	Charged multivesicular body protein 2b
SMED30018479	-0.618627	-0.740955	-1.27535	-1.60301	-1.53482	3.77744e-05	2.49283e-07	1.33996e-16	7.6816e-24	5.50884e-16	2
SMED30018491	0.355069	0.368969	-0.0433982	-0.654458	-2.21819	0.00393655	0.00190716	0.836559	2.48373e-07	3.31856e-39	2
SMED30018561	-1.48471	-1.54516	-0.30903	-0.268095	-0.9132	1.17948e-47	9.94895e-52	0.00338984	0.0109458	5.76577e-16	1		PANK2_ARATH	7e-11	Pantothenate kinase 2
SMED30018579	0.449612	0.160333	-0.0476393	-0.715827	-2.24314	0.000225653	0.265266	0.824547	1.72808e-08	7.34124e-37	2		CDT1_XENLA	8e-13	DNA replication factor Cdt1
SMED30018622	0.153127	0.0403453	-0.233906	-0.589158	-0.964791	0.0104988	0.607202	5.56672e-05	7.12343e-26	3.73394e-47	2		UNC9_CAEEL	7e-44	Innexin unc-9
SMED30018632	-0.6681	-0.749534	-0.428061	-0.450518	-0.328572	3.20747e-20	1.38842e-25	7.67549e-09	6.92713e-10	0.000104209	3		M3K3_ARATH	1e-41	Mitogen-activated protein kinase kinase kinase 3
SMED30018667	-0.857652	-0.623152	-0.193127	-0.125966	-0.0963773	1.65145e-25	4.64876e-14	0.0484483	0.230836	0.440526	3		NLTP_CHICK	7e-29	Non-specific lipid-transfer protein
SMED30018688	-0.269496	-0.476343	-0.235073	-0.204968	-0.0389989	3.04361e-06	1.8736e-18	7.07647e-05	0.000434673	0.666688	3		TRF6B_XENLA	1e-09	TNF receptor-associated factor 6-B
SMED30018689	0.096143	-0.145378	-0.192588	-0.579925	-0.520777	0.214031	0.033449	0.00504192	3.03755e-21	1.63036e-13	2		RBL2_MOUSE	3e-96	Retinoblastoma-like protein 2
SMED30018716	0.0248552	-0.145914	-0.292382	-0.618646	-1.16887	0.859398	0.134571	0.00100764	7.02448e-14	7.55938e-34	2	Y	AN32A_DROME	1e-26	Acidic leucine-rich nuclear phosphoprotein 32 family member A [Drosophila melanogaster]
SMED30018718	-0.244128	-0.544268	-0.274876	-0.525617	-0.521072	0.00068677	4.11373e-17	9.59639e-05	7.53298e-16	3.18632e-12	1		MVD1_DANRE	3e-65	Diphosphomevalonate decarboxylase
SMED30018744	-0.609038	-0.181302	-0.290559	-0.141929	0.059645	9.61382e-20	0.0141359	2.65343e-05	0.0710669	0.571557	3		GA2L2_MOUSE	1e-25	GAS2-like protein 2
SMED30018755	0.12675	-0.00740831	-0.273011	-0.556919	-1.19803	0.321587	0.964138	0.0143843	2.88601e-08	8.08441e-25	2		SUMO3_MOUSE	5e-30	Small ubiquitin-related modifier 3
SMED30018763	-1.11512	-1.15554	-0.213545	-0.435253	-0.00286659	1.30878e-14	6.07154e-15	0.199037	0.00327647	0.991112	3		MPC2_HUMAN	3e-38	Mitochondrial pyruvate carrier 2
SMED30018782	-0.428933	-0.550252	0.359385	0.1387	0.179619	2.47384e-10	9.03771e-18	7.78366e-09	0.0478743	0.0171593	3
SMED30018856	-0.779746	-0.80978	-0.496641	-0.542869	-0.385964	1.67819e-20	6.22208e-22	4.92011e-09	1.57972e-10	0.000137618	3		GRTP1_XENTR	7e-78	Growth hormone-regulated TBC protein 1 [Xenopus (Silurana) tropicalis]
SMED30018899	-1.91426	-3.01741	-0.589396	-0.946125	-0.500541	5.72133e-71	5.85396e-161	1.4371e-07	1.43435e-18	8.30384e-05	1		TSN3_MOUSE	2e-12	Tetraspanin-3
SMED30018924	-2.28172	-2.82824	-2.92704	-3.34576	-3.92704	7.12856e-46	2.53807e-66	5.3842e-70	1.73275e-86	7.32166e-78	1	Y
SMED30018929	-1.9846	-2.15394	-2.4376	-2.63601	-2.87869	1.1518e-73	3.38608e-78	4.32869e-103	1.24202e-103	4.27277e-82	1	Y
SMED30018949	-2.88367	-4.53913	-0.855991	-0.953333	-0.638063	5.56025e-91	1.6334e-144	6.51989e-14	9.19352e-17	8.52737e-07	1
SMED30018994	-0.89821	-1.15261	-0.333333	-0.631143	-0.0514009	2.22794e-10	3.74414e-17	0.0251898	2.13991e-06	0.822543	3		PRS6A_RAT	9e-79	26S protease regulatory subunit 6A
SMED30019011	0.213492	0.0113181	-0.390079	-0.900671	-1.51713	0.011174	0.929794	1.58304e-06	2.18211e-29	1.00514e-55	2		RAD50_MOUSE	0	DNA repair protein RAD50
SMED30019040	-1.40353	-2.05851	-0.646166	-0.901259	-0.935395	3.15102e-83	1.98986e-164	3.74118e-19	2.96059e-36	1.13148e-29	1	Y	CP3AC_CANFA	1e-73	Cytochrome P450 3A12
SMED30019056	-1.66074	-2.49352	-1.02251	-1.35501	-1.27981	4.79286e-41	2.51863e-74	2.67275e-18	6.71597e-29	9.79203e-22	1		MYCT_MOUSE	3e-43	Proton myo-inositol cotransporter
SMED30019057	-0.0242099	-0.151035	-0.278897	-0.691103	-1.25053	0.894356	0.243321	0.0190981	9.51817e-11	2.91858e-23	2
SMED30019073	0.471693	0.402437	-0.341614	-0.929994	-1.64044	0.000691656	0.00384975	0.0348228	2.64501e-10	1.10764e-19	2
SMED30019082	-0.924033	-1.18593	-0.724903	-0.971957	-0.830488	4.01925e-23	6.54374e-34	6.45513e-16	2.01285e-24	1.69407e-12	1		S47A2_MOUSE	1e-81	Multidrug and toxin extrusion protein 2
SMED30019097	1.08937	0.942693	0.299866	-0.350153	-1.1789	3.10177e-32	1.21249e-24	0.0068233	0.00151594	1.65232e-19	2		SOX13_HUMAN	5e-13	Transcription factor SOX-13
SMED30019099	-1.02026	-0.985394	-0.0437361	0.19789	0.153826	3.99242e-15	2.47012e-14	0.831809	0.155089	0.354187	3		UPP2_MOUSE	1e-57	Uridine phosphorylase 2
SMED30019154	-1.42366	-1.712	-2.13623	-2.50239	-2.86566	4.35327e-45	2.98837e-63	2.60326e-93	7.84931e-121	4.26602e-105	1	Y	GATM_RAT	2e-117	Glycine amidinotransferase, mitochondrial
SMED30019189	-0.309295	-0.401427	-0.458446	-0.581701	-0.805188	0.000706843	4.46191e-06	2.14464e-07	1.84515e-11	2.19967e-16	2		R37A2_ARATH	3e-10	60S ribosomal protein L37a-2 [Arabidopsis thaliana]
SMED30019207	-1.98989	-2.51811	-0.591058	-0.470201	-0.573145	1.14465e-28	5.6497e-37	0.000328718	0.00655713	0.00189593	3		UBP50_MACFA	8e-13	Putative ubiquitin carboxyl-terminal hydrolase 50
SMED30019245	-2.04622	-3.35128	-1.16658	-1.74106	-1.49334	2.98724e-18	3.58298e-34	6.75949e-08	1.31924e-14	4.78888e-09	1		TRF6B_XENLA	4e-08	TNF receptor-associated factor 6-B
SMED30019264	-2.57255	-2.57132	-0.974804	-0.984245	-0.387865	6.56188e-89	1.19066e-87	2.4185e-17	2.1419e-17	0.00544122	1		NATT4_THANI	2e-06	Natterin-4
SMED30019275	0.103101	-0.403966	-0.660043	-1.57808	-2.3424	0.565845	0.00288653	1.36309e-06	2.41522e-28	4.74161e-35	2		NBN_CHICK	2e-33	Nibrin
SMED30019281	-2.6191	-3.38609	-0.332105	-0.340986	-0.415525	1.34285e-45	1.67053e-57	0.0800111	0.0731736	0.0440985	3		SAT1_CHICK	7e-28	Diamine acetyltransferase 1
SMED30019284	-0.897365	-0.772892	-0.500245	-0.716504	-0.575122	5.0476e-42	8.97856e-32	4.42155e-14	3.3101e-27	6.48349e-14	1		LRRD1_HUMAN	8e-61	Leucine-rich repeat and death domain-containing protein 1 [Homo sapiens]
SMED30019291	-1.24746	-2.6215	-0.183082	-0.488495	0.327903	4.40588e-19	3.67086e-66	0.32299	0.000734519	0.0571576	3		CLN8_HUMAN	2e-47	Protein CLN8 [Homo sapiens]
SMED30019294	-0.978955	-0.941992	-0.201311	-0.159777	-0.246373	5.85591e-14	6.85691e-14	0.183545	0.288429	0.119088	3
SMED30019298	-0.245125	-0.521608	-0.441818	-0.714812	-0.895176	5.27572e-05	4.42776e-20	3.2183e-14	3.68038e-36	6.09598e-43	1		HNRPL_HUMAN	6e-103	Heterogeneous nuclear ribonucleoprotein L
SMED30019301	-2.51689	-3.66009	-1.0728	-1.49701	-1.23541	3.47928e-77	2.19128e-130	3.98932e-19	3.37034e-35	2.23547e-19	1		PKHG6_MOUSE	6e-34	Pleckstrin homology domain-containing family G member 6
SMED30019306	-2.64885	-4.6942	-1.35235	-1.95578	-1.60428	1.11676e-50	6.17277e-124	6.17367e-15	7.00584e-30	5.93585e-16	1		PDXT_BREBN	2e-39	Pyridoxal 5'-phosphate synthase subunit PdxT
SMED30019340	-1.02596	-1.15276	-0.688319	-0.756859	-0.887044	1.84116e-25	3.59973e-32	2.22209e-12	5.85541e-15	1.03864e-15	1
SMED30019356	-0.301517	-0.349108	-0.194854	-0.266665	-0.127217	5.02598e-12	2.39822e-16	2.11261e-05	9.60846e-10	0.0179567	3		NEB2_RAT	3e-51	Neurabin-2
SMED30019369	-1.74237	-1.76203	-3.41778	-3.65414	-4.11014	2.73804e-45	5.33729e-44	3.34591e-128	1.51191e-126	9.02694e-101	1
SMED30019383	-0.596577	-0.412223	-0.329474	-0.414647	-0.124027	3.95035e-14	8.27127e-08	5.88623e-05	9.53119e-08	0.244531	3
SMED30019420	-2.35075	-2.59441	-2.30648	-2.76074	-2.5763	7.7475e-21	1.23288e-23	1.99964e-20	3.42618e-25	3.98261e-17	1		RL40_TETPY	1e-06	Ubiquitin-60S ribosomal protein L40
SMED30019454	-0.436067	-0.5118	-0.0430629	-0.00527674	-0.155197	3.3462e-10	2.19529e-14	0.6969	0.968688	0.0720799	3		CALM_TETPY	3e-25	Calmodulin
SMED30019456	-0.795523	-0.91762	-0.384248	-0.593276	-0.373249	8.54827e-37	3.18141e-48	3.85037e-09	1.01982e-20	4.72327e-07	1		DPP2_RAT	8e-141	Dipeptidyl peptidase 2
SMED30019465	-0.950135	-1.27148	0.157268	0.454145	0.400062	1.56342e-09	1.085e-15	0.474267	0.00550778	0.0355299	3		TRAF6_XENTR	1e-06	TNF receptor-associated factor 6
SMED30019468	0.0734538	-0.303627	-0.182943	-0.527311	-0.856841	0.43544	1.16069e-05	0.0203811	6.61574e-15	3.59325e-29	2		ANM1B_XENLA	4e-159	Protein arginine N-methyltransferase 1-B
SMED30019499	-5.13699	-5.44704	-3.53546	-4.95682	-5.0723	1.65481e-23	2.42765e-22	3.07155e-18	5.54455e-21	9.35324e-11	1
SMED30019534	-1.28433	-0.734772	-0.989338	-0.658585	-0.864495	9.45023e-18	3.51935e-06	1.53905e-11	4.18684e-05	5.21426e-07	3
SMED30019542	-4.29359	-5.23621	-0.724699	-1.86161	-0.954323	5.26162e-11	5.82993e-14	0.100689	1.59288e-05	0.109255	3
SMED30019555	0.183528	-0.374298	-0.64484	-1.27599	-2.65454	0.460897	0.072032	0.00335833	1.10733e-09	1.2653e-16	2		TIPIN_DANRE	2e-16	TIMELESS-interacting protein [Danio rerio]
SMED30019590	0.158429	0.219446	-0.165826	-0.0653505	-0.531539	0.0128173	0.000176323	0.0108641	0.399027	2.64092e-16	2		NOTC3_RAT	2e-24	Neurogenic locus notch homolog protein 3
SMED30019647	0.534899	0.183945	-0.145812	-0.814971	-1.24225	3.08084e-07	0.132338	0.318508	7.20793e-14	2.32491e-22	2		ATM_PIG	8e-137	Serine-protein kinase ATM
SMED30019668	-0.632689	-0.85525	-0.327353	-0.571085	-0.178274	2.20007e-17	3.09495e-31	4.49039e-05	3.56194e-14	0.0692566	1		SAP_HUMAN	3e-17	Prosaposin
SMED30019681	0.296868	0.2291	-0.0661228	-0.126997	-0.529127	1.17281e-08	1.46755e-05	0.368034	0.0353232	1.22714e-18	2		XPP1_HUMAN	0	Xaa-Pro aminopeptidase 1
SMED30019697	-5.14138	-6.64007	-2.99571	-4.18015	-4.44785	5.71521e-89	9.42336e-106	1.48399e-46	5.73673e-71	1.83224e-54	1	Y	ACMSD_MOUSE	8e-124	2-amino-3-carboxymuconate-6-semialdehyde decarboxylase
SMED30019727	-0.542083	-0.621359	-0.253767	-0.318958	-0.0963395	9.68702e-30	2.76069e-40	2.53479e-07	1.66235e-11	0.126286	3		ARM_DROPS	1e-95	Armadillo segment polarity protein [Drosophila pseudoobscura pseudoobscura]
SMED30019729	-1.00917	-1.14398	-0.669948	-0.836035	-0.764154	1.88831e-44	2.61708e-58	3.97783e-22	1.13392e-33	8.38386e-22	1		BEST1_MACFA	6e-72	Bestrophin-1
SMED30019743	-0.668498	-1.26379	-2.40908	-2.85581	-2.98427	1.38638e-08	3.9266e-25	7.45139e-69	1.72585e-80	4.40661e-58	1	Y
SMED30019763	0.0396867	-0.197216	-0.207351	-0.39408	-0.719466	0.741475	0.0177641	0.0170523	4.06506e-07	3.6608e-16	2		NUDC1_MOUSE	8e-23	NudC domain-containing protein 1 [Mus musculus]
SMED30019784	-0.864426	-0.3045	-0.320077	0.0737355	0.270284	8.76422e-24	0.000405211	0.000191553	0.505302	0.00325405	3		YHJX_ECOLI	5e-09	Uncharacterized MFS-type transporter YhjX [Escherichia coli K-12]
SMED30019803	-0.103577	-0.519909	-0.452769	-1.05982	-2.11783	0.481493	9.48996e-07	4.28339e-05	1.16633e-24	5.67746e-67	2
SMED30019835	-0.129088	-0.313574	-0.281159	-0.497748	-0.475248	0.080908	4.36994e-07	1.64884e-05	1.01704e-15	5.80225e-11	2		PPWD1_BOVIN	3e-177	Peptidylprolyl isomerase domain and WD repeat-containing protein 1 [Bos taurus]
SMED30019889	0.278311	-0.110575	-0.473205	-1.15922	-2.05679	0.104003	0.598113	0.00585548	6.85694e-12	2.45081e-20	2		REV1_YEAST	5e-05	DNA repair protein REV1
SMED30019898	-0.38315	-0.680683	-0.141754	-0.292546	-0.0763603	8.68112e-06	4.95016e-17	0.1654	0.000490733	0.538255	3		M3K2_HUMAN	4e-36	Mitogen-activated protein kinase kinase kinase 2
SMED30019899	-1.57579	-2.0363	-0.439336	-0.996928	-1.06953	2.84725e-40	3.65009e-66	0.000300998	8.46694e-19	1.53839e-16	1		MIOX_DANRE	3e-110	Inositol oxygenase
SMED30019903	-0.159401	-0.325175	-0.220566	-0.428952	-0.537639	0.0198493	9.15327e-08	0.000793156	1.23745e-12	2.01853e-15	2		RL13A_HUMAN	3e-85	60S ribosomal protein L13a
SMED30019924	0.215606	-0.0893547	-0.322285	-0.709039	-1.29853	0.144311	0.617315	0.0270207	1.7438e-07	4.12498e-15	2		ADAT2_DANRE	3e-43	tRNA-specific adenosine deaminase 2
SMED30019939	-6.32055	-8.30675	-1.95245	-2.67882	-1.92239	5.96251e-115	3.5188e-137	1.43284e-26	1.97547e-45	5.54216e-20	1		S47A2_RABIT	1e-57	Multidrug and toxin extrusion protein 2
SMED30019981	-0.404615	-0.608598	-0.251052	-0.400873	-0.420708	2.22094e-08	1.03229e-18	0.000908027	9.26758e-09	2.36978e-07	3		ATRX_PANTR	3e-30	Transcriptional regulator ATRX
SMED30020041	-1.17315	-2.15612	-1.26869	-1.58799	-2.05815	4.14911e-07	6.97034e-19	3.59356e-08	5.18472e-12	7.43423e-14	1
SMED30020042	-1.01698	-1.40545	-0.820542	-0.743698	-1.20164	2.08849e-09	9.55346e-16	1.14233e-06	1.16427e-05	1.4098e-08	3
SMED30020057	-0.100776	-0.528191	-0.425639	-0.874703	-1.10582	0.307992	1.55332e-12	4.36336e-08	3.17715e-31	1.04385e-36	2
SMED30020068	-2.36839	-3.2959	-1.17011	-1.65723	-1.48002	1.20035e-49	4.1517e-87	5.42286e-14	3.98594e-27	4.91916e-17	1		ROST_DROME	1e-07	Protein rolling stone [Drosophila melanogaster]
SMED30020102	-1.51636	-2.19955	-0.718404	-0.973913	-1.19807	4.33343e-09	4.38478e-16	0.002768	2.71086e-05	3.69188e-05	3		BPL1_SCHPO	6e-20	Biotin--protein ligase
SMED30020105	-2.52898	-2.40266	-0.591101	-0.956994	-0.956059	8.1772e-28	3.66802e-25	0.00201647	1.00838e-06	3.61599e-05	3
SMED30020124	-0.153706	-0.467945	-0.423085	-0.668234	-0.91492	0.135424	3.11585e-08	1.49565e-06	2.67752e-15	1.40222e-21	2		RRS1_HUMAN	8e-27	Ribosome biogenesis regulatory protein homolog [Homo sapiens]
SMED30020142	0.509114	0.119933	0.0873693	-0.786551	-2.13196	0.00884264	0.627954	0.785694	8.52832e-05	1.04476e-15	2		PIF1_DANRE	6e-135	ATP-dependent DNA helicase PIF1
SMED30020153	-0.561442	-0.98672	-0.546329	-0.445436	-0.185731	7.1117e-08	7.49039e-21	1.77048e-07	2.9993e-05	0.187825	3		TRAF3_MOUSE	1e-05	TNF receptor-associated factor 3
SMED30020157	-1.57332	-1.49121	-1.04611	-0.653694	-1.57137	3.61894e-15	2.22557e-12	1.35197e-08	0.00103371	1.41681e-09	3
SMED30020173	-0.193348	-0.481475	-0.316019	-0.663369	-0.695632	0.0460982	1.04421e-08	0.000432693	5.67481e-15	1.32535e-12	2		NDUA9_RAT	7e-51	NADH dehydrogenase [ubiquinone] 1 alpha subcomplex subunit 9, mitochondrial
SMED30020244	-0.331923	-0.671284	-0.344449	-0.482263	-0.398282	3.58277e-06	2.56938e-23	1.94771e-06	3.00457e-12	4.63631e-07	3		M3K1_ARATH	1e-25	Mitogen-activated protein kinase kinase kinase 1
SMED30020253	-1.5613	-2.82682	-0.8784	-1.68773	-1.39061	3.60355e-06	7.53239e-17	0.0084142	2.31019e-08	7.72897e-05	3
SMED30020296	-2.50916	-6.1334	-0.618928	-0.945541	-0.707289	1.01662e-47	1.80258e-201	0.000875767	5.76344e-08	0.000529512	3		APLP_LOCMI	5e-54	Apolipophorins
SMED30020312	0.358451	0.00576412	-0.223153	-0.640385	-1.57886	0.000181592	0.968277	0.0439706	5.40459e-12	1.56926e-42	2		PRP43_YEAST	7e-72	Pre-mRNA-splicing factor ATP-dependent RNA helicase PRP43
SMED30020328	-0.453598	-0.311867	-3.69629	-4.27881	-4.21397	0.00796949	0.0848764	4.51386e-90	2.00974e-101	1.62879e-68	2
SMED30020355	-0.573533	-0.723416	-0.478331	-0.598347	-0.497677	4.1438e-28	8.67339e-45	1.23768e-19	9.63037e-31	4.41817e-17	1		SH3K1_HUMAN	4e-28	SH3 domain-containing kinase-binding protein 1
SMED30020356	-0.298824	-0.516462	-0.418861	-0.641142	-0.833456	3.81612e-06	1.56658e-16	4.09384e-11	3.75618e-24	4.62205e-29	1		MTCH2_PONAB	2e-32	Mitochondrial carrier homolog 2 [Pongo abelii]
SMED30020376	-2.36003	-2.85674	-0.919589	-1.19178	-0.866168	4.05128e-43	2.82539e-59	1.46511e-10	5.65787e-17	2.12014e-07	1		OSTF1_DANRE	8e-10	Osteoclast-stimulating factor 1 [Danio rerio]
SMED30020396	0.192094	-0.516973	-2.23128	-3.42469	-4.65452	0.371376	0.00240835	6.77416e-43	1.02899e-89	2.59045e-98	2
SMED30020414	-1.30414	-1.85939	-0.105073	-0.378118	-0.337762	7.801e-27	4.22933e-52	0.561499	0.00309217	0.0216324	3
SMED30020433	-1.15553	-1.47333	-0.865421	-0.981363	-0.696469	9.00871e-31	2.27344e-46	7.55697e-19	4.0298e-23	1.82149e-09	1		OXLT_OXAFO	2e-07	Oxalate:formate antiporter
SMED30020436	-0.397303	-0.537875	-0.197618	-0.135724	-0.207668	3.09673e-10	6.62426e-19	0.00439429	0.0568594	0.00502843	3		NDE1_RAT	7e-47	Nuclear distribution protein nudE homolog 1
SMED30020461	-1.61847	-2.20706	-0.317103	-0.444474	-0.943354	2.1191e-11	6.91469e-15	0.22012	0.0897116	6.88393e-05	3
SMED30020497	-1.09031	-1.11973	-0.942637	-0.924772	-1.56945	9.55349e-21	5.67495e-21	2.17655e-16	5.47357e-15	8.88278e-29	1		SVOP_XENLA	2e-37	Synaptic vesicle 2-related protein
SMED30020519	-0.83816	-1.06365	-0.731132	-0.752557	-0.550596	5.37736e-15	2.52714e-22	8.1587e-12	4.6069e-12	9.74918e-06	3
SMED30020600	-0.443657	-0.882805	0.822201	0.798989	0.942193	7.15882e-06	2.43831e-20	1.56563e-20	1.13163e-19	1.08207e-22	3		KMO_DANRE	1e-127	Kynurenine 3-monooxygenase
SMED30020614	-0.348821	-0.617661	-0.15749	-0.275021	-0.373667	6.84386e-11	6.06481e-33	0.00918268	4.37283e-07	5.01969e-10	3		DDX5_HUMAN	2e-158	Probable ATP-dependent RNA helicase DDX5
SMED30020615	0.199639	-0.0125244	-0.401469	-0.568645	-0.877479	0.0334711	0.92776	3.14375e-06	8.93019e-12	1.1426e-20	2		PHB2_XENTR	2e-118	Prohibitin-2 [Xenopus (Silurana) tropicalis]
SMED30020617	-0.621583	-0.812037	-0.29751	-0.332072	-0.739634	1.07041e-14	3.03685e-24	0.000520253	6.73894e-05	1.52424e-15	1		SHLB1_HUMAN	4e-33	Endophilin-B1
SMED30020626	1.02379	0.717812	-0.40672	-0.820139	-0.919539	9.36675e-34	9.63196e-18	0.000218564	1.80086e-15	1.68795e-13	2		BOLL_HUMAN	2e-32	Protein boule-like [Homo sapiens]
SMED30020630	-1.62979	-1.77043	-2.44051	-2.40561	-2.44342	2.36217e-14	3.18381e-15	3.70056e-26	6.74428e-23	8.86025e-15	1		Y1388_SYNY3	1e-10	Universal stress protein Sll1388
SMED30020702	-2.09301	-2.8161	-0.87558	-1.18025	-0.632936	2.88686e-44	2.62003e-66	1.45014e-10	2.28726e-17	5.77869e-05	1
SMED30020710	-0.254686	-0.291239	-1.50187	-1.40975	-1.87995	0.125309	0.07103	3.04789e-25	2.99775e-21	5.83181e-25	2	Y	SCOT_DICDI	9e-22	Probable succinyl-CoA:3-ketoacid coenzyme A transferase, mitochondrial
SMED30020736	0.0731563	-0.38317	-0.37219	-0.757898	-0.848387	0.576177	2.54529e-05	0.00011535	2.37527e-17	2.59952e-16	2		NOP5B_ARATH	7e-112	Probable nucleolar protein 5-2
SMED30020778	-0.39677	-1.05406	1.12669	1.05386	1.10538	4.34302e-06	5.78185e-38	9.77176e-45	1.3541e-39	9.91389e-37	3		ORCT_DROME	6e-32	Organic cation transporter protein [Drosophila melanogaster]
SMED30020782	-3.55355	-5.77711	-1.89567	-3.02299	-2.58155	5.74846e-12	3.9853e-17	5.82462e-06	2.25286e-10	2.83805e-07	3
SMED30020784	-0.922896	-0.965641	-0.249643	-0.222277	-0.213778	6.85562e-30	1.70825e-32	0.00328258	0.00930944	0.0326876	3
SMED30020794	-1.64118	-1.9977	-2.48162	-2.71742	-3.16318	4.94679e-48	2.14108e-67	3.53376e-97	7.02408e-110	4.15926e-96	1	Y
SMED30020797	-0.983554	-0.947168	-0.673487	-0.698254	-0.752367	1.46942e-26	1.23024e-25	9.91339e-14	9.23102e-15	1.69134e-12	1	Y	POGK_MOUSE	4e-13	Pogo transposable element with KRAB domain [Mus musculus]
SMED30020865	-1.71094	-1.78248	-1.56788	-1.98053	-2.04946	7.55933e-149	3.59243e-159	6.31207e-129	8.24446e-189	8.08221e-141	1	Y	TRHDE_RAT	4e-76	Thyrotropin-releasing hormone-degrading ectoenzyme
SMED30020874	-0.391999	-0.573104	-0.119341	-0.210525	-0.0765098	7.41136e-08	7.31214e-17	0.173658	0.00391875	0.463411	3		STK4_AOTNA	9e-38	Serine/threonine-protein kinase 4
SMED30020914	0.147612	-0.016263	-0.332634	-0.603713	-0.936406	0.115172	0.896918	6.12642e-05	2.69607e-14	1.63187e-24	2		DAP1_HUMAN	0.0003	Death-associated protein 1
SMED30020929	-0.412782	-0.531148	-0.412046	-0.561743	-0.427234	8.23185e-15	8.73074e-25	1.16494e-14	4.00272e-27	1.3716e-12	1		PP4R1_HUMAN	9e-28	Serine/threonine-protein phosphatase 4 regulatory subunit 1 [Homo sapiens]
SMED30020956	-1.07292	-1.51503	-0.244161	-0.392072	-0.0968418	1.95331e-42	9.02691e-82	0.00675167	2.01867e-06	0.421406	3		LYAG_RAT	0	Lysosomal alpha-glucosidase
SMED30020964	-1.49997	-2.31836	-4.05666	-4.92821	-5.63415	2.88176e-33	3.80014e-58	3.65438e-114	3.82106e-116	2.90747e-86	1	Y	MOCS3_CULQU	2e-86	Adenylyltransferase and sulfurtransferase MOCS3
SMED30020974	0.261152	0.133786	-0.241881	-0.843988	-1.5377	0.0159064	0.273285	0.0364094	5.2056e-17	3.71842e-37	2		TOP2B_HUMAN	0	DNA topoisomerase 2-beta
SMED30021001	-0.423049	-0.678691	-0.308165	-0.435517	-0.395249	9.09671e-10	9.60168e-25	1.77914e-05	1.27994e-10	2.65962e-07	3		Y4251_DICDI	6e-29	Probable serine/threonine-protein kinase DDB_G0284251 [Dictyostelium discoideum]
SMED30021018	-0.758829	-0.643181	-0.0692569	-0.0248252	-0.274184	6.11232e-18	3.11467e-13	0.593842	0.862836	0.00942992	3		GSXL2_ARATH	1e-51	Flavin-containing monooxygenase FMO GS-OX-like 2
SMED30021019	-0.10875	-0.365916	-0.393418	-0.272795	-0.904633	0.308874	9.89419e-06	3.24055e-06	0.00173287	2.10121e-23	2		YH24_CAEEL	5e-115	Putative aminopeptidase W07G4.4 [Caenorhabditis elegans]
SMED30021032	-0.189118	-0.543164	-0.0946817	-0.297428	-0.258519	0.000528248	3.37532e-28	0.143856	6.422e-09	9.74524e-06	3		IPO5_HUMAN	0	Importin-5
SMED30021037	-0.25602	-0.348707	-0.530776	-0.75909	-1.05923	0.0203987	0.00101535	1.94197e-07	2.6727e-13	1.89247e-17	2		NH2L1_XENTR	6e-45	NHP2-like protein 1
SMED30021042	-1.37879	-1.02987	-1.40546	-1.733	-0.917256	6.42648e-101	1.88042e-59	7.49549e-105	1.59424e-154	4.94356e-36	1		PPSA_METJA	2e-37	Probable phosphoenolpyruvate synthase
SMED30021048	-0.619223	-0.75605	-1.03645	-1.35899	-2.65347	0.0114013	0.00198098	1.3808e-05	7.37314e-08	1.40864e-15	2	Y	RU1C_NEMVE	2e-10	U1 small nuclear ribonucleoprotein C
SMED30021059	-1.40257	-1.66016	-1.56749	-1.34628	-1.82657	5.29314e-33	4.86848e-44	1.87304e-40	3.77737e-31	1.46324e-36	1	Y	TRAF6_BOVIN	3e-09	TNF receptor-associated factor 6
SMED30021063	-2.45232	-3.16748	-1.1999	-1.43477	-1.32853	8.54027e-64	4.14211e-100	1.29692e-16	1.51399e-23	1.02235e-15	1
SMED30021070	-0.329399	-0.604051	-0.255971	-0.457537	-0.343809	9.02371e-08	4.2146e-25	6.38158e-05	1.37245e-14	4.60374e-07	1		YODA_ARATH	7e-31	Mitogen-activated protein kinase kinase kinase YODA
SMED30021074	-0.0109415	-0.387803	-1.02157	-1.23303	-2.38643	0.971312	0.0228041	1.38692e-10	2.47536e-14	1.9948e-29	2		NTF2_RAT	2e-20	Nuclear transport factor 2
SMED30021122	-0.589185	-0.83734	-0.0617542	-0.382851	-0.810599	4.64306e-17	3.86522e-34	0.566233	7.60915e-08	1.88271e-24	1		SYYC_XENTR	6e-120	Tyrosine--tRNA ligase, cytoplasmic
SMED30021123	-2.72048	-3.82633	-1.05588	-1.52109	-1.23102	6.19318e-81	7.31773e-131	6.52452e-16	4.29827e-31	3.41215e-16	1		Y1207_METJA	8e-09	Uncharacterized N-acetyltransferase MJ1207 [Methanocaldococcus jannaschii DSM 2661]
SMED30021131	-3.34485	-6.22873	-1.49849	-2.14421	-1.67541	8.04943e-93	2.41892e-170	9.22977e-25	2.22845e-45	2.26477e-22	1
SMED30021146	-0.554368	-0.616225	-0.620978	-0.931968	-0.595776	3.08836e-10	2.24573e-12	1.85557e-12	1.38441e-25	7.24183e-09	2		NEUS_RAT	4e-52	Neuroserpin
SMED30021151	-0.479504	-0.559099	-0.258251	-0.267986	-0.299853	1.32087e-12	4.44788e-17	0.000331278	0.000137682	0.000136663	3		CIR1_RAT	5e-37	Corepressor interacting with RBPJ 1
SMED30021154	-0.481942	-0.597271	0.478603	0.684157	0.331847	1.85056e-09	2.67414e-14	2.8436e-09	1.43448e-18	0.000292828	3		CALM1_SOLTU	4e-35	Calmodulin-1
SMED30021161	-0.368382	-0.430103	-0.599832	-0.69879	-0.583241	0.00011035	3.22149e-06	8.74045e-11	2.2784e-14	2.37501e-08	2		SYPH_BOVIN	4e-30	Synaptophysin
SMED30021235	-2.64733	-2.85103	-1.3409	-1.57728	-1.23595	1.36332e-170	1.17924e-194	2.6941e-48	5.73715e-66	1.291e-31	1		TBA1_PARLI	0	Tubulin alpha-1 chain [Paracentrotus lividus]
SMED30021237	-0.853543	-0.914349	-0.31913	-0.497286	-0.487288	1.70721e-37	1.20421e-42	2.62666e-06	6.83938e-14	2.40659e-10	1		SPB10_CHICK	2e-62	Heterochromatin-associated protein MENT
SMED30021240	-0.404626	-0.607519	-0.3706	-0.886828	-1.95859	0.0564576	0.00125616	0.0856185	3.09251e-06	5.37301e-16	2		TONSL_HUMAN	3e-08	Tonsoku-like protein
SMED30021241	0.490003	0.113728	-0.291753	-1.04197	-2.05895	0.000694352	0.555366	0.111388	9.48252e-11	6.21939e-21	2
SMED30021243	-0.406903	-0.239803	-0.603851	-0.617883	-1.08312	0.000588755	0.071042	1.53567e-07	3.98999e-07	8.8068e-15	2		RPB9_DROME	4e-52	DNA-directed RNA polymerase II subunit RPB9
SMED30021257	-0.312074	0.448151	-3.24554	-4.29281	-2.35125	0.182262	0.0222844	4.13928e-36	1.50553e-42	2.7781e-15	2		SVOPL_HUMAN	3e-42	Putative transporter SVOPL
SMED30021265	-1.07028	-1.12153	-0.410739	-0.386783	-0.692339	7.28287e-58	1.05921e-61	3.11561e-10	5.0201e-09	4.62187e-20	1		MOG2A_XENLA	1e-116	2-acylglycerol O-acyltransferase 2-A
SMED30021284	-0.792164	-0.850405	-0.199363	-0.223819	-0.403666	2.12471e-24	3.26601e-27	0.0212302	0.00801571	1.29768e-05	3
SMED30021288	-0.338464	-0.562565	-0.404475	-0.498545	-0.331315	4.25189e-09	1.0611e-23	1.64198e-12	1.2602e-18	3.20018e-07	1		BDLP_NOSP7	3e-08	Bacterial dynamin-like protein
SMED30021298	0.61306	0.118595	-3.81415	-3.99254	-3.90879	0.024199	0.777097	5.68231e-17	8.3309e-15	1.1509e-11	2
SMED30021301	-0.95748	-1.46224	-1.52974	-1.67783	-1.74611	5.76294e-07	3.84022e-13	8.17871e-15	6.94109e-16	2.39674e-13	2		CP20A_BOVIN	3e-33	Cytochrome P450 20A1 [Bos taurus]
SMED30021321	-1.87884	-2.07576	-0.9247	-1.14644	-1.93105	2.73984e-16	4.62332e-19	2.12226e-05	1.29031e-07	1.33941e-13	3		DHYS_RAT	2e-141	Deoxyhypusine synthase
SMED30021359	-1.62187	-1.78108	-1.4074	-1.47485	-2.49939	3.68759e-21	2.15182e-22	4.82763e-18	4.58274e-17	2.63796e-21	1	Y
SMED30021402	0.160353	-0.0358854	-0.0225549	-0.534051	-1.41659	0.173222	0.809451	0.900609	1.77554e-07	3.76282e-28	2		CDC20_HUMAN	1e-36	Cell division cycle protein 20 homolog
SMED30021415	-2.36513	-4.36596	-2.11567	-3.15918	-2.81433	5.54426e-45	1.12303e-82	5.64629e-41	1.35728e-62	3.60544e-38	1
SMED30021445	-1.02327	-1.40867	0.402848	0.557776	0.745953	1.12631e-32	1.67616e-60	1.04366e-05	1.66634e-10	2.65339e-15	3		METK2_HUMAN	0	S-adenosylmethionine synthase isoform type-2
SMED30021464	-0.118979	-0.303138	-0.175867	-0.32771	-0.582092	0.0596274	1.20593e-08	0.00302684	9.40411e-10	2.56065e-22	2		G6PD_CRIGR	0	Glucose-6-phosphate 1-dehydrogenase
SMED30021509	0.0147765	-0.198805	-0.356161	-0.795705	-1.14519	0.934383	0.0938844	0.00174075	6.16808e-14	2.69474e-19	2		HGV2_HALRO	1e-10	Protein HGV2 [Halocynthia roretzi]
SMED30021535	-3.09748	-4.75213	-1.42767	-2.23518	-1.92619	3.23e-62	4.11154e-93	3.00958e-20	1.18245e-39	4.26218e-23	1		COPT1_RAT	0.0003	High affinity copper uptake protein 1
SMED30021545	-2.80662	-5.62862	-1.56778	-2.08699	-2.03241	2.57513e-40	1.02325e-123	8.3795e-14	1.45234e-23	6.89555e-17	1		GST28_SCHMA	1e-37	Glutathione S-transferase class-mu 28 kDa isozyme
SMED30021552	-0.494452	-1.08545	0.516363	0.277139	0.293397	0.000126485	2.78045e-18	5.6191e-06	0.0250268	0.0379102	3
SMED30021559	-0.71648	-1.23994	-0.266599	-0.590562	-0.910222	1.13086e-08	2.33102e-21	0.0495269	2.18642e-06	1.82506e-11	3
SMED30021579	0.054209	-0.0729264	-0.589052	-1.18698	-2.45898	0.850727	0.777261	0.0030281	1.27319e-09	1.18013e-18	2
SMED30021601	-0.444732	-0.376447	-0.627764	-0.523797	-0.871046	1.69072e-06	5.33782e-05	7.00713e-12	1.76508e-08	6.97545e-15	2
SMED30021612	-0.358359	-0.251871	-1.24964	-1.2127	-3.04512	0.162223	0.380665	5.25321e-08	1.09203e-06	3.19419e-17	2		RAD17_MOUSE	5e-47	Cell cycle checkpoint protein RAD17 [Mus musculus]
SMED30021685	-1.20089	-1.21865	-0.802088	-0.818308	-0.932576	6.8047e-40	1.00822e-41	1.166e-19	2.11895e-20	3.77509e-20	1		BEST1_MOUSE	8e-44	Bestrophin-1
SMED30021752	-1.06715	-1.38816	-0.567588	-0.712807	-1.01229	7.65246e-35	2.18353e-56	9.14069e-11	1.73609e-16	2.60001e-24	1	Y	CP2L1_PANAR	1e-65	Cytochrome P450 2L1
SMED30021758	-0.642044	-0.594649	-0.817943	-0.592883	-0.743806	1.06716e-11	4.91295e-10	4.85347e-18	8.42266e-10	1.47019e-11	2
SMED30021793	-1.28645	-1.18957	-2.13333	-2.07856	-2.49079	1.46689e-20	7.4766e-18	6.34767e-52	2.37109e-49	7.1626e-50	1	Y
SMED30021800	-1.45689	-2.15129	0.447649	0.404616	0.0671439	2.49471e-32	4.04058e-60	7.34122e-05	0.000340706	0.71937	3		TDH_BOVIN	2e-131	L-threonine 3-dehydrogenase, mitochondrial
SMED30021808	-0.0805835	-0.247888	-0.847727	-1.30855	-2.45076	0.617751	0.0455192	1.18469e-13	2.0993e-28	3.10177e-56	2
SMED30021814	-1.29321	-2.09866	-1.20146	-1.57035	-1.96292	8.91155e-11	4.38769e-23	9.2276e-10	5.03137e-15	2.24224e-13	1
SMED30021830	-0.0070716	-0.118462	-0.214277	-0.510957	-0.483486	0.952724	0.11901	0.00347906	1.03656e-14	2.85091e-10	2		SYVM_MOUSE	7e-132	Valine--tRNA ligase, mitochondrial
SMED30021873	-0.499512	-0.661092	-0.572	-0.553241	-0.488162	1.49259e-08	2.30795e-14	7.03478e-11	2.42112e-10	1.84709e-06	3		AMACR_MOUSE	6e-101	Alpha-methylacyl-CoA racemase
SMED30021877	-3.10239	-2.88211	-1.41213	-1.81909	-1.86679	1.15149e-41	1.19227e-38	2.56569e-14	8.82324e-21	1.83363e-15	1		S47A1_RABIT	2e-69	Multidrug and toxin extrusion protein 1
SMED30021913	-0.0764362	-0.254315	-0.373729	-0.496639	-0.722493	0.47451	0.00174699	3.60655e-06	3.15649e-10	3.76554e-15	2		CLPB_BOVIN	0	Caseinolytic peptidase B protein homolog
SMED30021957	0.726684	0.684691	-0.159914	-0.0211533	-1.029	1.1088e-13	8.78323e-13	0.279856	0.907165	2.15219e-14	2
SMED30021960	-1.78898	-2.193	-0.795315	-0.899493	-0.711338	1.56931e-168	1.24581e-243	8.31917e-37	5.72501e-47	3.33864e-23	1	Y	AMPE_RAT	3e-76	Glutamyl aminopeptidase
SMED30021962	-0.236904	-0.408709	-0.29131	-0.431221	-0.486049	3.73902e-05	1.41135e-14	2.40131e-07	8.36974e-16	1.90068e-15	1		PELO_PONAB	4e-163	Protein pelota homolog [Pongo abelii]
SMED30021963	-2.48032	-2.74918	-0.698412	-1.09331	-0.108992	1.52878e-14	9.3809e-18	0.00811356	1.88325e-05	0.772396	3		SETMR_HUMAN	3e-14	Histone-lysine N-methyltransferase SETMAR
SMED30021984	-2.47847	-2.86637	-2.53369	-2.62037	-2.57357	7.33956e-23	1.23155e-24	1.004e-23	1.15254e-21	6.50958e-16	1
SMED30022038	-1.45621	-4.09366	-1.0318	-1.49003	-0.960037	2.25518e-19	6.62395e-100	3.11561e-10	5.09007e-20	2.57623e-07	1		S47A1_PONAB	2e-69	Multidrug and toxin extrusion protein 1
SMED30022080	-0.309708	-0.345125	-0.574923	-0.81676	-0.0628795	0.00416242	0.00066542	1.88559e-08	1.55335e-16	0.695833	2		B3GT1_MOUSE	8e-38	Beta-1,3-galactosyltransferase 1
SMED30022125	-0.250771	-0.526123	-0.135816	-0.297051	-0.154835	4.62293e-05	8.88124e-21	0.0517687	3.82023e-07	0.0323375	3
SMED30022130	-1.30282	-1.75684	-3.1495	-3.4133	-3.38354	5.40067e-23	6.89622e-39	1.21658e-100	2.74032e-109	5.16371e-74	1	Y
SMED30022145	0.0817772	-0.26631	-0.846349	-1.64694	-2.62055	0.786468	0.267066	3.61576e-05	1.03283e-14	2.49907e-21	2		AURK_DICDI	2e-72	Aurora kinase [Dictyostelium discoideum]
SMED30022154	-0.762206	-0.806707	-0.543072	-0.700613	-0.591179	4.23852e-23	7.65211e-26	4.15759e-12	1.56416e-19	2.6162e-11	1		RAB43_HUMAN	4e-85	Ras-related protein Rab-43
SMED30022156	-0.16579	-0.542699	-0.834588	-1.02632	-1.24829	0.124304	4.28841e-09	2.28238e-19	7.29916e-27	6.02498e-28	2		NHL1_CAEEL	2e-08	RING finger protein nhl-1 [Caenorhabditis elegans]
SMED30022178	-1.16518	-1.6581	-0.269844	-0.474659	-0.371616	1.88194e-23	8.33147e-46	0.045722	5.9808e-05	0.00695338	3		GBG_NEUCR	0.0006	Guanine nucleotide-binding protein subunit gamma
SMED30022184	-0.602994	-0.743167	-0.318771	-0.411221	-0.231337	1.14761e-11	1.92395e-17	0.000869137	6.21264e-06	0.0402689	3		SC61B_CANFA	2e-26	Protein transport protein Sec61 subunit beta [Canis lupus familiaris]
SMED30022209	-0.0608338	-0.438087	-0.379583	-0.694043	-0.792998	0.43984	4.26978e-15	5.12712e-11	1.46356e-35	1.91771e-35	1		ATD3B_XENLA	0	ATPase family AAA domain-containing protein 3-B [Xenopus laevis]
SMED30022210	-3.70866	-5.96717	-1.87296	-2.49936	-2.21013	5.19366e-68	1.77033e-94	2.91218e-26	1.87642e-38	4.24738e-23	1
SMED30022231	-1.492	-1.83478	0.244458	0.2782	0.304425	2.39336e-39	4.39272e-53	0.0423263	0.0164732	0.0177419	3		ACSS3_HUMAN	2e-149	Acyl-CoA synthetase short-chain family member 3, mitochondrial
SMED30022238	-0.398244	-0.857286	-0.514712	-0.742125	-0.866976	5.70133e-06	1.72516e-24	2.88597e-09	1.47495e-18	4.41514e-19	1		RBBP4_HUMAN	0	Histone-binding protein RBBP4
SMED30022249	-0.446998	-0.504038	-0.321943	-0.474232	-0.385585	1.56351e-12	3.58112e-16	7.64209e-07	3.53363e-14	1.00196e-07	1		EPN4_BOVIN	3e-30	Clathrin interactor 1
SMED30022253	0.0308462	-0.0538583	-0.173416	-0.448421	-0.75675	0.777209	0.567557	0.026051	5.37092e-11	4.82547e-22	2		NU160_HUMAN	3e-35	Nuclear pore complex protein Nup160
SMED30022256	-0.349105	-0.429889	-0.2414	-0.244153	-0.245341	9.89967e-11	2.70332e-16	1.93614e-05	9.39473e-06	7.97032e-05	3		EF2K_HUMAN	7e-149	Eukaryotic elongation factor 2 kinase
SMED30022282	-0.865257	-0.802176	-0.182616	-0.360778	-0.306525	9.28236e-23	3.00821e-19	0.0687427	7.59643e-05	0.00449322	3		ABD12_DANRE	1e-44	Monoacylglycerol lipase ABHD12
SMED30022301	-0.732628	-1.49784	-1.34306	-1.85009	-2.78207	0.000278598	3.29193e-15	8.50287e-11	3.87685e-20	3.4795e-19	1
SMED30022314	-0.0635037	-0.294407	-0.414637	-0.661875	-1.0324	0.496309	1.38545e-05	9.10288e-10	1.95155e-23	1.89435e-40	2		U5S1_MOUSE	0	116 kDa U5 small nuclear ribonucleoprotein component
SMED30022325	-0.816145	-1.15697	-0.771529	-0.98677	-1.39268	2.44453e-31	4.13421e-61	4.83139e-28	4.32864e-45	1.60013e-62	1	Y
SMED30022329	-3.0827	-5.38916	-1.00588	-1.26071	-1.46771	2.81431e-42	3.69535e-60	6.57231e-09	1.5207e-11	3.56921e-10	3
SMED30022331	-0.515165	-0.447127	-0.0907774	-0.184786	-0.111466	4.15043e-14	4.3181e-11	0.325904	0.0140054	0.23774	3		SSRG_PONAB	3e-57	Translocon-associated protein subunit gamma
SMED30022359	-1.08606	-0.935393	-0.0246228	0.0694017	-0.642688	4.87612e-18	2.34209e-14	0.908776	0.686988	3.06867e-06	3		LR74A_HUMAN	2e-36	Leucine-rich repeat-containing protein 74A
SMED30022437	0.279679	0.0174864	-0.327325	-0.71897	-1.28017	0.0242256	0.924891	0.0110169	1.37123e-09	3.15166e-19	2	Y	RFA2_PONAB	2e-23	Replication protein A 32 kDa subunit
SMED30022444	-0.0776561	-0.00917998	-0.878272	-1.14875	-2.58293	0.63802	0.961857	9.334e-15	1.26099e-22	1.03715e-64	2
SMED30022447	0.424573	0.161014	-0.12097	-0.427301	-0.71115	7.40461e-11	0.027026	0.152069	1.62285e-10	1.35655e-20	2		GLYC_SHEEP	0	Serine hydroxymethyltransferase, cytosolic
SMED30022453	-0.421533	-1.0162	0.907284	0.691321	1.20906	3.68169e-07	1.07143e-37	1.18231e-31	6.61281e-19	8.61779e-48	3		AQP_DROME	8e-33	Aquaporin [Drosophila melanogaster]
SMED30022463	-0.953778	-1.3802	-0.285577	-0.35385	-0.18764	6.19871e-30	3.65347e-59	0.00121108	2.46832e-05	0.0796163	3
SMED30022470	-0.129272	-0.459967	-0.0734797	-0.279388	-0.318536	0.0725637	4.9691e-15	0.391957	5.09347e-06	3.01358e-06	3		METL6_HUMAN	1e-63	Methyltransferase-like protein 6 [Homo sapiens]
SMED30022491	0.0787444	0.165048	-0.397616	-0.798049	-1.43401	0.663891	0.273778	0.0034842	3.81482e-09	4.62067e-19	2
SMED30022542	-0.510873	-0.261516	-0.223348	0.0343632	-0.0182393	6.57602e-14	0.000210874	0.00179833	0.738239	0.883479	3		UBIQP_TETPY	2e-32	Polyubiquitin
SMED30022560	-0.409584	-0.401088	-0.503943	-0.436125	-0.70205	6.9433e-08	1.09062e-07	2.90384e-11	9.07528e-09	7.40911e-17	2		RL28_RAT	5e-20	60S ribosomal protein L28 [Rattus norvegicus]
SMED30022574	-0.823969	-0.901686	-0.0265921	-0.0595446	-0.576997	1.23581e-28	8.2739e-35	0.842445	0.575844	5.88452e-12	3		PCTL_MOUSE	5e-55	PCTP-like protein
SMED30022575	-0.236968	-0.671202	-0.354992	-0.686485	-0.673849	0.00472088	1.90662e-19	9.77997e-06	6.23252e-20	3.38608e-15	1		PESC_NEMVE	2e-103	Pescadillo homolog [Nematostella vectensis]
SMED30022595	-0.205079	-0.554936	0.364756	0.259443	0.250395	0.0132988	6.09532e-15	5.70192e-07	0.000335812	0.00244703	3		KBL_MOUSE	4e-162	2-amino-3-ketobutyrate coenzyme A ligase, mitochondrial
SMED30022596	-1.10643	-1.82129	-0.61625	-0.98752	-0.733211	2.29794e-28	4.24721e-73	3.35176e-09	9.95279e-23	2.62587e-10	1
SMED30022601	0.287588	-0.101464	-0.346783	-0.55901	-1.6227	0.0595013	0.579554	0.0281498	6.5757e-05	1.95116e-21	2
SMED30022614	-0.303123	-0.422985	-0.283226	-0.333351	-0.480097	1.82791e-07	4.43329e-14	1.84056e-06	6.59312e-09	5.0164e-14	1		TCPA_SCHMA	0	T-complex protein 1 subunit alpha
SMED30022627	-0.135337	-0.276785	-0.369369	-0.877826	-1.4214	0.236232	0.00395805	0.000111692	6.92875e-22	8.95017e-40	2
SMED30022628	0.0599995	0.0323563	-0.828927	-0.793701	-0.387785	0.610335	0.791103	1.12721e-25	9.48237e-24	3.28974e-05	2		PLAC8_HUMAN	3e-09	Placenta-specific gene 8 protein
SMED30022646	-3.11809	-5.40805	-1.59021	-2.53928	-2.10936	1.29328e-23	2.12676e-41	2.55243e-10	3.05005e-21	8.72115e-11	1
SMED30022652	-0.975252	-1.47629	0.329488	0.539975	0.502484	1.79925e-14	1.61081e-31	0.0239238	3.57372e-05	0.000591871	3		SAP_CAVPO	3e-09	Saposin-C
SMED30022665	-1.41691	-1.10887	-0.309607	-0.295596	-0.147577	1.04507e-75	2.6298e-48	1.67517e-05	6.97235e-05	0.124686	3		MOGT2_HUMAN	1e-116	2-acylglycerol O-acyltransferase 2
SMED30022713	-1.14887	-1.73617	-1.20418	-1.40834	-0.832465	4.25104e-08	2.88606e-18	5.75187e-09	1.99253e-13	0.000174054	3
SMED30022784	-1.7935	-1.50707	-3.70963	-3.6825	-4.39299	1.05017e-16	6.61791e-12	1.02148e-42	2.5252e-36	1.67957e-30	1	Y
SMED30022805	-0.969225	-1.68476	-0.851762	-1.28104	-1.96616	1.44978e-16	1.28708e-46	9.95898e-13	1.23066e-27	5.33767e-45	1
SMED30022825	-0.976297	-1.26651	-0.461868	-0.398188	-0.35764	6.12102e-13	3.89368e-19	0.00061007	0.00428822	0.0261251	3		GL1D1_XENTR	2e-30	Glycosyltransferase 1 domain-containing protein 1
SMED30022840	-3.50892	-3.94428	-1.5032	-1.92362	-1.69877	1.85253e-80	2.43626e-97	1.01784e-17	3.07341e-28	4.2575e-17	1
SMED30022841	-1.54461	-2.59443	-0.652257	-0.283752	-1.63423	9.37613e-19	6.42006e-36	3.0874e-05	0.100985	2.2314e-14	1		CQ098_HUMAN	3e-34	Uncharacterized protein C17orf98 [Homo sapiens]
SMED30022880	-1.77856	-2.94267	-0.308212	-0.931167	-0.649066	8.05839e-45	8.40284e-110	0.0343197	5.77639e-14	6.0173e-06	1		T41AA_DANRE	2e-64	Transmembrane protein 41A-A
SMED30022891	-0.0952115	-0.358727	-0.748438	-0.902014	-1.07172	0.437872	5.24994e-05	9.22183e-16	5.56242e-24	9.22936e-26	2		OSGEP_XENLA	3e-82	Probable tRNA N6-adenosine threonylcarbamoyltransferase
SMED30022958	-1.58936	-1.25364	-0.963373	-0.845048	-1.09942	1.31021e-26	2.76905e-16	5.46126e-12	1.65943e-08	5.69023e-11	3		PGBD2_HUMAN	1e-32	PiggyBac transposable element-derived protein 2 [Homo sapiens]
SMED30022968	-0.984466	-1.08433	-0.189743	0.0644458	-0.157133	8.00149e-11	9.94785e-14	0.273416	0.735728	0.395948	3
SMED30022978	0.112354	-0.0944139	-0.190283	-0.480937	-0.827042	0.161615	0.242615	0.00987112	1.66226e-13	9.07306e-29	2		DDX4_BOVIN	1e-118	Probable ATP-dependent RNA helicase DDX4
SMED30022984	-0.46548	-0.443488	-0.64698	-0.764128	-0.405127	3.4714e-07	8.59599e-07	7.95411e-13	5.2849e-17	0.000130231	2		FGFR2_XENLA	0.0004	Fibroblast growth factor receptor 2
SMED30022996	-1.13372	-1.65914	-0.887593	-1.32103	-1.07151	3.50079e-15	1.32062e-27	3.17014e-10	4.1607e-19	4.19334e-11	1
SMED30023006	-3.01607	-5.13948	-1.39657	-1.94331	-1.5793	3.70317e-122	1.86001e-211	6.59602e-37	9.0213e-64	6.55525e-34	1	Y	CELR1_HUMAN	2e-17	Cadherin EGF LAG seven-pass G-type receptor 1
SMED30023014	-0.808642	-0.646056	-0.0663496	0.045798	0.0766895	2.19163e-17	1.09212e-11	0.621337	0.736889	0.593954	3		NAGTA_MOUSE	0.0001	Sodium-dependent glucose transporter 1A [Mus musculus]
SMED30023017	-1.67386	-2.34593	-1.40971	-1.71116	-1.88137	2.88691e-43	1.2384e-79	4.33715e-31	1.01179e-44	1.79824e-39	1
SMED30023035	0.0222531	-0.0496917	-0.466808	-1.0187	-2.88752	0.924821	0.817075	0.0026855	1.05021e-10	8.37355e-36	2
SMED30023050	-0.838563	-0.954603	-0.467614	-0.424341	-0.437231	1.11386e-42	4.02778e-55	8.46636e-14	1.15778e-11	6.84849e-10	1		ALDH2_RAT	0	Aldehyde dehydrogenase, mitochondrial
SMED30023057	-0.0806241	-0.252117	-0.253597	-0.595932	-0.652158	0.291649	2.21713e-05	4.0632e-05	3.29341e-25	4.78881e-23	2		PTBP3_MOUSE	1e-109	Polypyrimidine tract-binding protein 3
SMED30023062	0.00901719	-0.409772	-0.625058	-1.33581	-2.27865	0.952503	1.34736e-06	1.07398e-13	3.85437e-58	4.75835e-111	2	Y	CEL3A_XENLA	3e-66	CUGBP Elav-like family member 3-A
SMED30023063	0.482147	-0.0283064	-0.327592	-0.800623	-1.38505	0.000333077	0.886361	0.0423921	4.45209e-09	1.75681e-16	2		HELQ_MOUSE	0	Helicase POLQ-like
SMED30023071	-0.33531	-0.735944	-1.21814	-1.24379	-1.17386	9.62907e-06	4.48888e-24	2.14653e-56	3.10826e-59	1.15435e-38	1
SMED30023101	-1.96158	-2.55002	-0.871739	-1.0465	-0.86134	2.58042e-98	1.08619e-137	3.9579e-25	4.43416e-33	1.4525e-17	1		ST7R_ARATH	1e-98	7-dehydrocholesterol reductase
SMED30023109	-0.737095	-1.01048	-0.52658	-0.7857	-1.06254	1.44921e-12	4.83163e-23	1.1376e-06	3.75527e-14	3.67943e-19	1	Y	CATL1_HUMAN	1e-96	Cathepsin L1
SMED30023167	-0.754429	-0.434154	-0.191029	-0.117844	-0.223413	4.59699e-16	4.63271e-06	0.0634875	0.314121	0.0515694	3		HMGT_ONCMY	2e-38	High mobility group-T protein
SMED30023171	-0.78359	-0.905526	-0.258275	-0.270265	-0.139966	5.0639e-10	6.28147e-14	0.0574971	0.0333416	0.411032	3		STRA6_BOVIN	4e-09	Stimulated by retinoic acid gene 6 protein homolog [Bos taurus]
SMED30023183	-0.284234	-0.584051	-0.138072	-0.218343	-0.399863	3.82343e-05	6.72124e-19	0.0810904	0.00191982	1.21689e-07	3		COX11_HUMAN	2e-70	Cytochrome c oxidase assembly protein COX11, mitochondrial
SMED30023196	-0.455656	-0.664644	-0.158131	-0.125772	-0.149795	5.63214e-10	1.05624e-19	0.0670806	0.158593	0.124775	3		YEGX_ECOLI	7e-25	Uncharacterized protein YegX [Escherichia coli K-12]
SMED30023223	-0.992124	-0.897689	0.977616	1.10559	0.996136	3.30426e-52	3.43208e-42	1.97399e-63	2.10365e-79	2.74871e-51	3		GRIK2_HUMAN	7e-94	Glutamate receptor ionotropic, kainate 2
SMED30023256	-2.01713	-3.1397	-0.859825	-1.08862	-1.02237	3.9128e-18	6.87844e-35	6.10782e-05	1.24455e-07	1.2017e-05	3
SMED30023257	0.18058	0.194112	-0.392085	-0.900089	-2.21525	0.252557	0.213079	0.00685353	8.49593e-10	4.27789e-30	2
SMED30023294	-0.984815	-1.02326	-1.12802	-1.10676	-1.33864	5.08692e-20	1.46757e-22	8.41186e-26	2.06141e-25	1.13199e-25	1		S22A3_MOUSE	2e-36	Solute carrier family 22 member 3
SMED30023307	-2.09284	-4.63185	-1.59977	-1.958	-1.60551	5.03064e-43	1.83184e-140	3.01474e-26	2.02774e-37	7.40156e-20	1	Y	TRAF5_MOUSE	1e-11	TNF receptor-associated factor 5 [Mus musculus]
SMED30023398	-1.84909	-2.10055	-2.86619	-2.75884	-3.37708	4.33608e-39	4.65059e-48	4.36211e-81	5.25809e-74	2.96258e-71	1
SMED30023408	-0.393379	-0.527598	-0.160098	-0.201199	-0.134689	4.71027e-08	5.36678e-14	0.0562259	0.00955195	0.154984	3		RER1_MOUSE	1e-67	Protein RER1 [Mus musculus]
SMED30023430	0.146796	0.080142	-0.137933	-0.346115	-0.635903	0.0545633	0.34677	0.0855798	2.40788e-07	7.58202e-18	2		SET_MOUSE	1e-61	Protein SET
SMED30023478	-1.73606	-2.0084	-0.306834	-0.452271	-0.0814958	3.08439e-32	1.50149e-40	0.0338163	0.000790536	0.698127	3		UBP50_MACFA	3e-13	Putative ubiquitin carboxyl-terminal hydrolase 50
SMED30023489	-0.566622	-0.593983	-0.594691	-0.587686	-0.955486	3.86143e-15	4.90321e-16	2.18806e-16	1.91401e-15	9.52494e-29	1	Y	CISD3_MOUSE	9e-14	CDGSH iron-sulfur domain-containing protein 3, mitochondrial
SMED30023536	-1.41463	-1.64171	-0.798651	-0.892383	-1.40917	7.64671e-82	9.06685e-103	5.51388e-29	2.53331e-34	8.46925e-58	1	Y	MGST3_HUMAN	1e-19	Microsomal glutathione S-transferase 3
SMED30023538	-0.273604	-0.557009	-0.187777	-0.345455	-0.317732	2.44763e-07	5.46108e-29	0.000845661	1.48203e-11	3.96256e-08	3		YGC1_SCHPO	2e-16	UPF0661 TPR repeat-containing protein C16D10.01c [Schizosaccharomyces pombe 972h-]
SMED30023603	-1.21313	-1.67108	0.306929	0.177994	0.393555	8.39439e-10	1.35693e-16	0.144954	0.443429	0.0759998	3
SMED30023708	0.841578	0.245759	-2.25583	-2.5452	-2.85215	1.38671e-20	0.0256225	8.74917e-81	5.2106e-86	3.35016e-68	2	Y	ZN341_HUMAN	2e-11	Zinc finger protein 341 [Homo sapiens]
SMED30023722	-0.866271	-1.56044	-0.830917	-1.21046	-0.744133	1.65678e-15	2.26061e-42	2.49811e-14	4.16563e-27	3.92892e-09	1		YPT1_YEAST	1e-27	GTP-binding protein YPT1
SMED30023751	-0.915771	-1.29085	-0.553341	-0.691393	-0.692963	4.21461e-25	1.05121e-48	1.91494e-09	1.45244e-14	1.20891e-11	1		COTL1_BOVIN	3e-37	Coactosin-like protein [Bos taurus]
SMED30023779	-0.903029	-1.47511	-0.891901	-1.26754	-1.41271	2.05648e-06	1.09099e-14	2.89086e-06	2.38602e-11	8.68761e-11	3
SMED30023805	-0.397105	-0.630076	-0.0742577	-0.337983	-0.525147	1.88037e-13	5.05222e-32	0.301271	4.73036e-10	5.44211e-17	1		PDIA4_RAT	2e-128	Protein disulfide-isomerase A4
SMED30023821	0.105928	-0.0843183	-0.280041	-1.05576	-2.69367	0.476044	0.57614	0.024085	1.00644e-21	2.21193e-73	2		MCM4A_XENLA	0	DNA replication licensing factor mcm4-A
SMED30023829	0.240802	0.0609273	-0.161737	-0.569148	-0.747529	0.010561	0.612326	0.134798	4.01129e-11	3.15569e-14	2		NU188_XENTR	9e-18	Nucleoporin NUP188 homolog [Xenopus (Silurana) tropicalis]
SMED30023854	-0.44952	-1.03363	1.00805	0.909127	0.462705	2.20645e-05	2.67664e-25	1.25343e-28	1.48117e-24	1.08247e-05	3		CAH7_HUMAN	2e-40	Carbonic anhydrase 7
SMED30023874	-0.162923	-0.695973	0.658048	0.589464	1.04102	0.0883086	1.40003e-18	1.86533e-17	2.2953e-14	4.66901e-37	3		ACY1_MOUSE	3e-98	Aminoacylase-1
SMED30023880	-1.52794	-2.90491	-0.633816	-0.823016	-0.567393	2.48263e-17	5.56212e-50	0.000609832	2.3746e-06	0.00534137	3		YHJX_ECOLI	0.0001	Uncharacterized MFS-type transporter YhjX [Escherichia coli K-12]
SMED30023910	0.148814	-0.12265	-0.276415	-0.57403	-0.948465	0.12615	0.211084	0.00210582	3.00457e-12	1.48576e-22	2
SMED30023924	-0.19087	-0.930204	-1.01335	-1.60209	-2.31047	0.597171	0.000263888	0.000122809	1.56589e-10	1.04941e-14	2
SMED30023958	-2.29056	-2.97312	-0.772708	-1.07086	-0.97686	1.51177e-35	2.69468e-48	2.58738e-06	1.53963e-10	5.22308e-07	3
SMED30023988	-1.69543	-2.42016	-0.922922	-1.2505	-1.27517	8.98628e-55	3.44492e-96	1.71314e-18	1.18603e-31	7.32822e-25	1		MARF_DROME	2e-33	Transmembrane GTPase Marf
SMED30024008	-0.435054	-0.622831	-0.436983	-0.692267	-0.544304	5.24454e-12	1.94854e-25	3.41448e-12	1.97486e-30	9.48191e-15	1		MTMRE_MOUSE	7e-93	Myotubularin-related protein 14
SMED30024011	-0.180474	-0.555278	0.135644	0.0157186	0.138797	0.0315345	9.50722e-15	0.13962	0.90012	0.151805	3		TENX_HUMAN	7e-12	Tenascin-X
SMED30024023	-0.82248	-1.26326	-0.489814	-0.537361	-0.516034	4.55022e-16	2.22139e-31	1.54011e-06	3.28864e-07	3.74069e-05	3		RDH2_RAT	9e-05	Retinol dehydrogenase 2
SMED30024035	-0.681311	-0.600577	0.0494614	0.114834	0.169735	1.98312e-30	4.29103e-25	0.57226	0.0848084	0.0138314	3		STK4_SQUAC	3e-26	Serine/threonine-protein kinase 3/4
SMED30024058	-0.710713	-0.646646	-1.26208	-1.0406	-1.72121	3.26684e-16	2.03467e-13	1.22e-45	9.13136e-31	3.1361e-54	1
SMED30024126	-0.113756	-0.512664	-0.601709	-0.859313	-1.26841	0.520499	0.000116401	7.33071e-06	1.39262e-10	1.67381e-14	2
SMED30024138	-0.443247	-0.341487	-0.532908	-0.495345	-0.406226	3.6881e-15	1.11264e-09	2.12217e-21	1.09273e-18	3.25304e-10	1		JAC1_CAEEL	3e-55	Juxtamembrane domain-associated catenin
SMED30024165	-1.29347	-1.80106	-5.02028	-7.58754	-6.49157	2.42977e-11	1.29555e-19	1.04828e-68	1.28429e-80	3.20658e-42	1	Y
SMED30024189	-0.221907	-0.346499	-0.347939	-0.479785	-0.651475	0.00235599	3.69198e-07	6.31214e-07	1.13831e-12	8.82154e-18	2		RL31_PIG	1e-50	60S ribosomal protein L31 [Sus scrofa]
SMED30024190	-0.803875	-1.01603	-0.516441	-0.662683	-0.466612	3.72342e-43	6.09185e-67	1.24676e-18	8.18868e-30	5.20544e-12	1		EGL4_CAEBR	0	cGMP-dependent protein kinase egl-4
SMED30024204	-2.27549	-5.1394	-0.801499	-1.54977	-1.33505	1.05178e-49	3.13069e-191	4.4053e-07	2.92299e-24	3.51715e-14	1
SMED30024236	-1.70948	-2.35421	-0.60773	-0.595419	-0.252253	1.36191e-91	1.43361e-160	7.42489e-13	1.72075e-12	0.0156688	3		UNC9_CAEEL	1e-84	Innexin unc-9
SMED30024269	-0.0525877	0.0363677	-3.52858	-3.71868	-3.23783	0.792212	0.858696	1.31526e-69	2.34692e-60	1.06541e-37	2
SMED30024279	-0.748482	-0.784563	-0.118504	-0.198272	0.00205367	1.05371e-40	8.70856e-46	0.0764286	0.000713957	0.98535	3		CTL4_DANRE	2e-130	Choline transporter-like protein 4
SMED30024286	-0.678636	-1.07269	-0.238932	-0.346465	-0.189143	2.75457e-11	4.62158e-27	0.0383032	0.000772191	0.147496	3		PGRP_TRINI	1e-29	Peptidoglycan recognition protein
SMED30024299	-1.24311	-1.36713	-0.609359	-0.547971	-1.19173	1.94055e-16	1.01117e-18	3.65076e-05	0.000289418	1.68081e-11	3
SMED30024316	-0.85065	-1.24063	0.0706499	0.122914	-0.105521	1.5796e-28	1.29694e-57	0.537511	0.190989	0.34113	3		RBSK_HUMAN	3e-46	Ribokinase [Homo sapiens]
SMED30024368	-1.82429	-1.84439	0.0189288	-0.158086	-0.266399	2.49892e-161	2.53153e-167	0.879623	0.0383348	0.000768338	3		CHD4_MOUSE	0	Chromodomain-helicase-DNA-binding protein 4
SMED30024429	-4.22545	-7.09008	-3.36568	-4.05639	-3.87744	1.04138e-63	3.79614e-115	1.97521e-44	1.28622e-58	5.75317e-39	1
SMED30024468	0.167793	0.077917	-0.205316	-0.680624	-2.11569	0.31233	0.677616	0.224902	8.67814e-07	1.84227e-31	2		DLGP1_DANRE	0.0002	Disks large-associated protein 1
SMED30024477	-2.68918	-3.38467	-0.600852	-0.227416	-2.15315	2.23821e-21	2.24595e-26	0.0118264	0.424506	1.16771e-10	3
SMED30024502	-2.07874	-5.78883	-1.08161	-1.19894	-0.474654	8.0937e-12	1.89601e-29	0.000101768	3.07393e-05	0.197016	3
SMED30024503	-0.692597	-1.30748	0.0307696	0.395965	0.258304	1.87657e-12	2.34928e-35	0.855771	2.82678e-05	0.0294158	3		MAAI_MOUSE	4e-52	Maleylacetoacetate isomerase
SMED30024516	-0.464083	-0.596394	-0.473543	-0.544972	-0.605085	1.82362e-10	7.48134e-17	5.84199e-11	3.85363e-14	8.37193e-13	1		MFTC_MACFA	6e-104	Mitochondrial folate transporter/carrier
SMED30024521	-0.980154	-1.3817	-0.570584	-0.555212	-0.233237	4.50919e-16	1.35444e-26	1.56655e-06	6.74659e-06	0.136194	3		WDR41_HUMAN	7e-08	WD repeat-containing protein 41 [Homo sapiens]
SMED30024555	0.210923	-0.601369	-0.263631	-1.26267	-2.29995	0.354111	0.000323007	0.267468	3.37355e-13	3.563e-22	2		CDK1A_XENLA	5e-72	Cyclin-dependent kinase 1-A
SMED30024583	-1.44589	-3.9284	-0.742252	-2.01523	-1.51599	3.89167e-12	4.84282e-57	0.000586209	5.14822e-22	1.53532e-10	1
SMED30024637	-0.498062	-0.770526	-0.305343	-0.436433	-0.0965419	6.03927e-07	6.90332e-16	0.00398934	8.17164e-06	0.513611	3
SMED30024665	-0.20752	-0.408971	-0.348075	-0.42719	-0.507849	0.000621889	2.86619e-13	1.88623e-09	3.94601e-14	1.22721e-15	2		CISY_THUOB	0	Citrate synthase, mitochondrial
SMED30024671	-0.116794	-0.0408688	-0.581339	-0.620003	-1.0806	0.304275	0.764843	9.52843e-11	4.37506e-11	9.90066e-23	2	Y	TI13B_XENLA	2e-21	Mitochondrial import inner membrane translocase subunit Tim13-B [Xenopus laevis]
SMED30024711	-0.384442	-0.399523	-0.199633	-0.164086	-0.25947	4.92524e-13	3.3597e-14	0.000368819	0.00403285	2.61768e-05	3
SMED30024718	-1.44471	-2.14732	0.35046	0.216213	-0.223776	1.20293e-54	9.21596e-107	0.000139085	0.0283591	0.0472317	3		RGN_XENLA	6e-50	Regucalcin
SMED30024735	0.192517	-0.27081	-0.168109	-0.958578	-1.92209	0.416462	0.200118	0.525909	2.05093e-07	1.92447e-15	2
SMED30024770	-0.486198	-0.120939	-0.227473	-0.140167	-0.031918	3.89117e-14	0.101034	0.000883023	0.054704	0.772025	3
SMED30024865	0.120658	-0.169377	-0.299727	-0.212159	-1.17156	0.284471	0.0951636	0.00156021	0.0315465	5.92625e-33	2	Y	NF60_DORPE	2e-72	60 kDa neurofilament protein
SMED30024871	-3.21386	-2.76876	-0.980028	-1.81166	-1.19011	2.22565e-17	3.85638e-15	0.000686191	5.43847e-09	0.00143517	3
SMED30024872	-0.14959	-0.490212	-0.157883	-0.488406	-0.606398	0.0385508	3.56554e-16	0.0299062	9.14567e-16	2.88393e-18	1		CHRD1_DANRE	2e-75	Cysteine and histidine-rich domain-containing protein 1
SMED30024887	-0.175685	-0.341966	-0.319818	-0.501058	-0.719389	0.0109303	3.93535e-08	6.47957e-07	3.93677e-16	3.28823e-25	2		DX39B_MOUSE	0	Spliceosome RNA helicase Ddx39b
SMED30024908	0.17887	-0.404137	-0.97242	-2.22981	-3.14135	0.433368	0.0360858	1.09222e-06	2.37937e-23	7.86317e-23	2		WEE2_XENTR	2e-21	Wee1-like protein kinase 2 [Xenopus (Silurana) tropicalis]
SMED30024910	0.107105	-0.157956	-0.163965	-0.413846	-0.598286	0.166686	0.0223927	0.0235188	3.91646e-11	2.31408e-17	2		SYLC_HUMAN	0	Leucine--tRNA ligase, cytoplasmic
SMED30024934	-2.04805	-2.06567	-1.62155	-1.52457	-1.26258	7.32076e-45	2.6215e-48	3.50918e-33	1.12831e-30	2.8357e-16	1	Y	BDH_RAT	2e-45	D-beta-hydroxybutyrate dehydrogenase, mitochondrial
SMED30024938	-3.65785	-4.05027	-1.64408	-1.7847	-1.65396	9.36912287147697e-314	0	2.8153e-90	4.42585e-103	2.31089e-66	1		HMCN1_HUMAN	0.0002	Hemicentin-1
SMED30024958	-0.673509	-0.689054	-0.423705	-0.342009	-0.365204	4.11237e-20	2.78342e-21	2.72722e-08	7.89986e-06	2.0777e-05	3		VAPA_HUMAN	7e-57	Vesicle-associated membrane protein-associated protein A
SMED30024961	-0.0262373	-0.112418	-0.18777	-0.423032	-0.5832	0.801292	0.141807	0.00836544	1.10694e-10	5.59697e-15	2		TRA2B_RAT	2e-30	Transformer-2 protein homolog beta
SMED30024973	-2.01024	-2.38621	-1.02721	-1.13122	-0.834945	1.85783e-105	6.26394e-138	1.06133e-32	1.77254e-38	4.33934e-17	1
SMED30025013	-1.54215	-2.12035	-3.01387	-2.50987	-5.05638	6.47059e-07	1.0426e-10	9.12142e-17	5.475e-13	9.18924e-18	2
SMED30025017	0.123818	0.0893029	-0.34594	-0.464352	-1.11252	0.347357	0.516444	0.00203672	2.3066e-05	5.86519e-18	2
SMED30025050	-0.870138	-1.06653	-0.799376	-0.899996	-0.725623	1.94841e-21	2.63002e-31	1.26191e-18	5.84896e-23	2.04603e-12	1		CB043_CHICK	2e-36	UPF0554 protein C2orf43 homolog [Gallus gallus]
SMED30025100	-0.634669	-0.666059	-0.104803	0.327556	-0.0596946	1.65312e-12	1.89615e-14	0.399553	0.000227625	0.677948	3		TRAF2_MOUSE	3e-24	TNF receptor-associated factor 2
SMED30025105	-0.833203	-0.94341	-0.532237	-0.325985	-0.268013	4.27392e-40	4.22786e-51	1.51015e-16	8.37475e-07	0.000451016	1		PLSL_MOUSE	2e-146	Plastin-2
SMED30025116	-1.04266	-1.36885	-0.735658	-0.986462	-0.855738	1.09176e-36	3.09796e-62	1.07481e-18	2.79946e-33	9.35078e-20	1
SMED30025141	-0.137904	-0.255582	-0.178981	-0.377191	-0.523242	0.0461808	2.96213e-05	0.00735347	3.66059e-10	8.8345e-15	2
SMED30025210	-0.43213	-0.784868	-0.210737	-0.252849	-0.14021	1.24187e-06	7.81851e-20	0.0324883	0.00591121	0.232324	3		RAB6B_HUMAN	2e-27	Ras-related protein Rab-6B [Homo sapiens]
SMED30025222	0.0802008	-0.238083	-0.181495	-0.568875	-0.949685	0.482062	0.00688068	0.0651685	5.95394e-12	4.50266e-24	2		DKC1_DROME	1e-161	H/ACA ribonucleoprotein complex subunit 4
SMED30025245	0.170904	-0.314491	-0.457503	-1.23757	-2.27989	0.411675	0.0654385	0.0114863	1.91226e-14	1.12691e-24	2		KI20B_MOUSE	5e-70	Kinesin-like protein KIF20B
SMED30025256	-0.849216	-0.999291	-0.389018	-0.464256	-0.361539	1.10093e-24	8.09048e-33	4.01624e-06	2.88991e-08	0.000204679	3
SMED30025272	-0.0782275	-0.360329	-0.586575	-0.799546	-0.713022	0.519479	3.0998e-05	1.3413e-11	1.81602e-21	1.09611e-13	2		LAMC1_MOUSE	0	Laminin subunit gamma-1
SMED30025277	-0.400585	-0.404693	-0.45303	-0.335293	-0.368341	1.26487e-13	4.48522e-14	4.70736e-17	8.0524e-10	1.89257e-09	1
SMED30025300	-1.30436	-1.24244	-0.702778	-0.618698	-0.513243	2.20262e-36	2.71435e-34	1.14415e-12	3.27813e-10	6.38534e-06	3
SMED30025313	-0.188301	-0.316357	-0.345174	-0.48584	-0.461938	0.000931484	2.25843e-09	1.48009e-10	1.94688e-20	1.38072e-14	2		TRXR3_HUMAN	0	Thioredoxin reductase 3
SMED30025317	-0.65632	-0.732253	-0.458368	-0.472384	-0.51003	4.1896e-19	1.37564e-23	1.49329e-09	3.26439e-10	2.05535e-09	3		Y3950_MYCS2	7e-08	Universal stress protein MSMEG_3950/MSMEI_3859
SMED30025324	-0.659953	-0.937057	-0.191288	-0.375774	-0.359231	1.79999e-09	3.37536e-17	0.14108	0.000996028	0.0049581	3		CLN6_HUMAN	2e-61	Ceroid-lipofuscinosis neuronal protein 6
SMED30025330	0.129302	-0.127376	-0.319793	-0.74647	-0.896826	0.254866	0.2429	0.00115884	2.28268e-16	5.31082e-17	2		BCS1_MOUSE	5e-144	Mitochondrial chaperone BCS1
SMED30025331	0.436816	0.304965	-0.248623	-0.297428	-0.619655	2.16177e-15	6.35117e-08	4.09916e-05	4.58736e-07	2.63473e-21	2		LONM_MOUSE	0	Lon protease homolog, mitochondrial
SMED30025332	-0.16984	-0.183331	-0.343318	-0.43897	-0.683827	0.0328052	0.0169542	2.02455e-06	4.0379e-10	5.35948e-18	2		Y8359_ORYSJ	2e-17	Uncharacterized protein Os08g0359500 [Oryza sativa Japonica Group]
SMED30025349	-2.49871	-2.55894	-2.75059	-2.95851	-3.49993	1.31982e-15	2.35151e-15	3.05544e-18	1.05979e-17	9.67385e-14	1
SMED30025363	-1.99179	-2.76242	-2.59565	-2.78601	-3.16044	1.34614e-54	5.00308e-97	1.334e-86	1.42691e-97	1.202e-85	1
SMED30025367	-0.276162	-0.28551	-0.436778	-0.44312	-0.247523	3.29717e-08	7.19473e-09	4.94801e-19	8.8833e-20	1.49094e-05	2		VATA_MANSE	0	V-type proton ATPase catalytic subunit A
SMED30025368	-0.895336	-0.674886	-0.525616	-0.308308	-0.358337	3.64082e-27	2.45707e-15	6.20105e-10	0.000705694	0.00045884	3		GAPR1_MOUSE	6e-26	Golgi-associated plant pathogenesis-related protein 1
SMED30025401	-0.122167	-0.375733	0.041239	-0.071728	-0.00800568	0.0117995	7.01776e-19	0.522582	0.174857	0.922725	3		PUR2_BOVIN	0	Trifunctional purine biosynthetic protein adenosine-3
SMED30025421	0.244077	-0.0288903	-0.70154	-1.25316	-2.8063	0.11139	0.888353	1.46846e-06	8.21162e-17	5.63414e-37	2		EXO1_HUMAN	5e-84	Exonuclease 1
SMED30025422	-0.255334	-0.57021	-0.515339	-0.605469	-0.810299	0.00399844	1.52369e-12	5.48853e-10	1.0366e-13	1.79897e-18	2		GRPE1_MOUSE	9e-51	GrpE protein homolog 1, mitochondrial
SMED30025489	-1.97972	-2.02063	-0.963763	-1.29504	-1.57253	6.67476e-70	4.24277e-72	1.20184e-18	3.67651e-32	4.3991e-34	1		Y2452_ARATH	1e-59	DUF21 domain-containing protein At2g14520
SMED30025522	-0.0675855	-0.335585	-0.356856	-0.561841	-0.953553	0.432677	7.87652e-08	2.24924e-08	4.60118e-20	3.3803e-43	2	Y	CH60_CHICK	0	60 kDa heat shock protein, mitochondrial
SMED30025543	-0.337917	-0.406772	-0.231608	-0.26171	-0.132309	7.78869e-10	2.52321e-14	5.52296e-05	2.29195e-06	0.0552113	3		CCD93_XENTR	5e-100	Coiled-coil domain-containing protein 93 [Xenopus (Silurana) tropicalis]
SMED30025547	-0.888353	-1.13718	-0.449026	-0.647401	-0.414877	1.93518e-39	1.37329e-59	1.57849e-11	1.17722e-21	1.10708e-07	1		GDAP2_NEMVE	2e-82	Protein GDAP2 homolog [Nematostella vectensis]
SMED30025582	0.032031	-2.4353	-0.233229	-0.106283	-0.886981	0.918718	6.31525e-19	0.359282	0.744035	0.000871482	3
SMED30025584	-1.15972	-1.11317	-1.48947	-1.59942	-2.3505	9.62678e-28	1.70531e-25	1.89045e-43	3.25423e-47	1.96223e-63	1	Y
SMED30025591	-1.257	-1.6765	-0.69424	-1.14569	-1.05006	2.09558e-44	2.91147e-77	5.4001e-14	4.43857e-37	2.92459e-24	1		PDPK1_RAT	2e-109	3-phosphoinositide-dependent protein kinase 1
SMED30025603	-3.00696	-3.78456	-3.37214	-3.70604	-4.21906	3.93339e-87	8.47003e-124	1.86501e-104	3.98531e-119	2.54737e-100	1	Y
SMED30025661	-0.230424	-0.436046	-0.516406	-0.791705	-1.30186	0.0971081	0.000459422	2.90459e-05	1.57379e-10	2.05454e-18	2		AURKC_HUMAN	9e-74	Aurora kinase C
SMED30025720	-1.73508	-1.99514	-0.326394	-0.213097	0.158169	2.6268e-17	1.00419e-19	0.1164	0.357544	0.50152	3
SMED30025741	0.365907	0.216226	-2.91248	-3.81989	-4.5842	0.131562	0.414078	6.22962e-45	1.99653e-70	5.52421e-65	2
SMED30025750	0.347222	0.226109	-0.407017	-0.625708	-0.568594	2.74198e-09	0.000148909	2.49713e-11	4.4788e-26	3.47527e-16	2
SMED30025757	0.646352	0.43497	-0.175794	-0.664622	-1.22597	1.1517e-14	3.60383e-07	0.0982142	1.62912e-14	2.32855e-34	2
SMED30025761	-0.601985	-0.945644	0.176178	-0.00587693	-0.0614773	8.72704e-10	6.5042e-24	0.110045	0.974264	0.680211	3		WWTR1_HUMAN	3e-07	WW domain-containing transcription regulator protein 1
SMED30025780	0.278878	0.11415	-0.311994	-0.838436	-1.75014	0.0106305	0.379821	0.00536016	2.8934e-16	1.86457e-44	2		PLK1_RAT	0	Serine/threonine-protein kinase PLK1
SMED30025781	0.202108	-0.371516	-0.416125	-1.43155	-1.5193	0.140841	0.00126044	0.000807484	1.8556e-37	1.31627e-29	2	Y	WDR36_HUMAN	2e-97	WD repeat-containing protein 36
SMED30025783	-0.430871	-0.642089	-0.23947	-0.253001	-0.127584	9.41065e-14	6.14517e-30	0.000117642	2.87839e-05	0.0947882	3		NCPR_HUMAN	0	NADPH--cytochrome P450 reductase
SMED30025787	-1.56436	-2.62888	-0.505067	-0.293035	-1.38793	3.14567e-25	4.22153e-54	0.000370929	0.0477567	1.19306e-16	1		ACH3_DROME	3e-131	Acetylcholine receptor subunit beta-like 1
SMED30025797	-1.93305	-4.09338	-1.53986	-2.00003	-1.79525	4.30897e-35	2.5907e-79	6.91457e-25	2.15431e-33	7.2878e-22	1		TRAF2_HUMAN	6e-19	TNF receptor-associated factor 2
SMED30025831	-0.204186	-0.722341	0.53214	0.438684	0.558336	0.01879	1.30847e-21	1.05909e-13	5.06259e-10	3.99042e-13	3		S28A3_EPTST	3e-113	Solute carrier family 28 member 3
SMED30025839	0.291396	0.322979	-0.231709	-0.230932	-0.820676	3.79874e-06	1.71858e-07	0.000485827	0.000399405	6.52918e-33	2		LKHA4_BOVIN	5e-165	Leukotriene A-4 hydrolase
SMED30025840	-1.38675	-2.16517	-0.555262	-0.651399	-0.674736	3.65224e-12	3.58648e-23	0.00713107	0.00144783	0.0027016	3
SMED30025865	-0.684622	-0.899052	-0.543571	-0.704829	-0.640729	1.63575e-34	5.69591e-58	3.95732e-22	2.8506e-36	1.61922e-23	1		SCPDL_HUMAN	1e-113	Saccharopine dehydrogenase-like oxidoreductase [Homo sapiens]
SMED30025885	-0.0440105	-0.175387	-0.604353	-1.06628	-2.48089	0.873526	0.411012	0.000694733	2.08904e-09	1.31978e-23	2	Y	TRAF4_HUMAN	5e-07	TNF receptor-associated factor 4
SMED30025889	-1.65408	-1.89274	-0.334459	-0.580454	-0.180328	1.8881e-106	4.06715e-136	2.24115e-05	9.01683e-15	0.0621619	1		MCLN3_MOUSE	4e-61	Mucolipin-3 [Mus musculus]
SMED30025910	-0.458045	-0.553399	-0.233842	-0.390372	-0.290238	1.74345e-10	3.7184e-15	0.00305613	7.33438e-08	0.000640948	3		FUTSC_DROME	8e-18	Microtubule-associated protein futsch
SMED30025913	-1.5059	-2.04814	-0.870274	-0.961217	-1.06907	1.35124e-27	7.91759e-44	2.6996e-11	4.28782e-13	1.01996e-12	3		MYCT_HUMAN	7e-73	Proton myo-inositol cotransporter
SMED30025929	-2.77593	-3.49662	-3.65466	-3.70121	-3.0228	8.68737e-13	2.78276e-15	1.43004e-17	6.73473e-16	1.67032e-06	1
SMED30025937	0.0142868	0.191239	-1.06893	-1.46623	-1.58438	0.951452	0.226929	3.1431e-14	1.62861e-23	5.83553e-19	2
SMED30025961	-0.984251	-1.20518	-0.657916	-1.09385	-1.05308	3.46831e-24	1.95036e-36	2.16756e-11	4.11549e-30	1.38515e-21	1		ABHD4_MOUSE	2e-79	Abhydrolase domain-containing protein 4
SMED30025971	-1.61534	-2.13713	-0.169062	-0.100062	0.299767	4.53292e-75	1.4383e-122	0.113711	0.389422	0.00311209	3		TRAF5_HUMAN	1e-27	TNF receptor-associated factor 5
SMED30025981	0.00592181	-0.542527	-0.473502	-1.26413	-2.57013	0.991603	0.00568081	0.0288817	1.66355e-10	5.97345e-21	2
SMED30026014	-0.0825941	-0.432303	-0.412462	-1.12125	-1.11535	0.539316	5.69929e-06	4.05007e-05	7.86036e-30	1.34755e-20	2	Y	WDHD1_XENLA	4e-53	WD repeat and HMG-box DNA-binding protein 1
SMED30026043	-0.270684	-0.409955	0.36512	0.425353	0.260727	5.88937e-07	2.74614e-15	1.66762e-12	3.38227e-17	9.64803e-06	3		UGPA_BOVIN	0	UTP--glucose-1-phosphate uridylyltransferase
SMED30026079	-0.207372	-0.583293	-0.144593	-0.448672	-0.299526	0.000714765	6.10257e-27	0.0286621	3.06636e-16	2.80969e-06	1		CDKAL_XENLA	0	Threonylcarbamoyladenosine tRNA methylthiotransferase
SMED30026098	-2.36649	-5.71185	-0.655124	-1.04935	-0.62677	3.92624e-64	2.20925e-128	2.7823e-08	1.32397e-16	2.37158e-05	1		NTCP2_RABIT	7e-33	Ileal sodium/bile acid cotransporter
SMED30026101	-1.79871	-2.2397	-3.19774	-3.92462	-4.42443	5.95492e-59	4.1169e-78	2.3879e-136	3.19173e-153	7.87921e-119	1		CALUA_DANRE	7e-47	Calumenin-A
SMED30026114	-0.698095	-1.17214	-2.48297	-3.50507	-4.31414	2.87325e-05	5.04463e-12	1.55703e-40	1.48784e-56	2.41017e-43	2
SMED30026116	-1.23839	-1.23164	-0.437182	-0.0518294	-0.0236731	4.69527e-16	5.91063e-15	0.00271108	0.809826	0.929135	3		FUCT1_CAEEL	9e-26	GDP-fucose transporter [Caenorhabditis elegans]
SMED30026121	0.195246	-0.190247	-0.213549	-0.632334	-0.678044	0.0250736	0.0258656	0.0156199	1.23562e-16	1.27718e-14	2		ENPP6_DANRE	2e-48	Ectonucleotide pyrophosphatase/phosphodiesterase family member 6
SMED30026127	-0.681099	-0.52262	-0.222115	-0.0768007	-0.521187	1.50627e-15	4.54996e-10	0.0187968	0.50311	5.88605e-08	3
SMED30026136	-0.53721	-0.844584	0.657503	0.831346	0.967634	7.2243e-09	5.51387e-21	4.3285e-15	3.43561e-25	3.39521e-29	3
SMED30026141	-1.20679	-3.45795	-0.638848	-0.987136	-0.994729	3.38863e-12	6.35974e-52	0.000209967	7.01398e-09	7.32064e-07	3
SMED30026153	-0.398041	-0.802654	-0.486365	-0.592832	-0.750038	3.37179e-05	3.21136e-17	2.67031e-07	4.62226e-10	5.72728e-11	3		YHJX_ECOLI	7e-19	Uncharacterized MFS-type transporter YhjX [Escherichia coli K-12]
SMED30026171	-1.03012	-1.31479	-0.658561	-0.726357	-0.684796	1.07646e-43	1.97768e-70	5.32873e-19	1.97103e-23	1.38488e-16	1
SMED30026181	-1.12344	-1.23231	-0.289857	-0.472073	-0.348077	7.24727e-54	5.17801e-65	7.89117e-05	1.86702e-11	2.57404e-05	3		TPC2_HUMAN	1e-66	Two pore calcium channel protein 2
SMED30026197	-2.22025	-5.50893	-1.11377	-1.49682	-0.979267	3.36958e-25	2.47132e-55	3.43667e-08	1.46494e-11	0.000161079	3		DHR11_HUMAN	4e-74	Dehydrogenase/reductase SDR family member 11
SMED30026225	0.0887857	0.0362715	-0.252572	-0.425226	-0.726754	0.347403	0.733506	0.00103573	2.44964e-09	4.4483e-20	2
SMED30026242	-1.14301	-1.30456	-0.782681	-0.922669	-0.601967	9.81274e-46	4.57149e-57	1.53136e-22	6.10135e-30	1.31716e-10	1		SCAM1_HUMAN	5e-44	Secretory carrier-associated membrane protein 1
SMED30026247	0.222489	0.0925522	-0.316784	-0.921564	-1.81186	0.229376	0.672696	0.086201	3.56931e-08	3.85885e-17	2		SLBP1_XENLA	1e-12	Histone RNA hairpin-binding protein
SMED30026256	-0.406279	-0.567999	-0.426408	-0.284863	-0.560299	1.74235e-08	5.54137e-16	4.35088e-09	0.000129393	3.83344e-12	3
SMED30026259	-0.413343	-0.560612	0.0156326	-0.120185	-0.0512379	6.23784e-12	1.5548e-21	0.891318	0.0936857	0.598383	3		ABCA1_HUMAN	0	ATP-binding cassette sub-family A member 1
SMED30026298	-0.536382	-0.764079	-0.125833	-0.0991147	-0.123062	8.08072e-16	1.44032e-31	0.113134	0.212379	0.154743	3		ANP1_ARATH	4e-24	Mitogen-activated protein kinase kinase kinase ANP1
SMED30026364	0.460917	0.00142438	-3.15628	-3.9117	-4.28107	0.00507142	0.995489	2.50176e-82	1.67012e-112	2.70891e-88	2		P53_PLAFE	4e-13	Cellular tumor antigen p53
SMED30026367	0.308669	0.135695	-0.121911	-0.314432	-0.588848	1.0871e-07	0.0367293	0.0850402	1.13604e-07	3.80965e-19	2		PNKP_HUMAN	6e-95	Bifunctional polynucleotide phosphatase/kinase
SMED30026394	-2.42166	-3.17929	-2.85814	-3.12398	-3.4041	6.7375e-81	4.8315e-130	1.37997e-107	2.16994e-125	2.59858e-102	1	Y
SMED30026414	-1.16425	-1.30023	-1.98239	-2.28021	-2.52482	5.73734e-31	2.03722e-38	1.12681e-77	4.27022e-96	2.66852e-78	1	Y	M17L2_DANRE	2e-25	Mpv17-like protein 2 [Danio rerio]
SMED30026425	-1.56067	-1.9581	0.135497	-0.30234	-2.02292	3.12059e-27	2.11635e-41	0.538014	0.0770917	2.65139e-32	1
SMED30026439	-0.941056	-0.772935	-0.22829	0.256332	0.630795	8.04936e-28	1.02586e-19	0.0158453	0.00337188	1.42818e-13	3		TCAF3_MOUSE	2e-31	TRPM8 channel-associated factor 3
SMED30026459	-0.505818	-0.333696	-0.717819	-0.778766	-1.02937	3.43736e-06	0.0033417	2.30243e-11	2.59945e-13	2.57148e-17	2
SMED30026496	0.263003	-0.0105246	-0.1391	-1.17215	-2.49329	0.330279	0.974003	0.686022	1.1434e-06	8.70048e-15	2		EEPD1_HUMAN	4e-47	Endonuclease/exonuclease/phosphatase family domain-containing protein 1 [Homo sapiens]
SMED30026515	0.0653819	-0.0111213	-0.18637	-0.394898	-0.723425	0.47837	0.918172	0.0134747	6.42894e-09	8.8482e-21	2		PUR9_RAT	0	Bifunctional purine biosynthesis protein PURH
SMED30026537	-1.04504	-1.35258	0.00141194	0.210721	-0.103076	1.93492e-14	8.28492e-23	0.99577	0.208703	0.637664	3
SMED30026539	0.305669	0.0858596	-0.408409	-0.551935	-1.26721	0.0157724	0.593796	0.00098482	2.37823e-06	6.89529e-22	2		CH10_SCHJA	4e-43	10 kDa heat shock protein, mitochondrial
SMED30026560	0.172002	-0.276518	-0.678129	-1.54538	-2.80775	0.153749	0.0102766	3.10067e-11	1.8467e-50	6.88874e-93	2		MCM3_DROME	0	DNA replication licensing factor Mcm3
SMED30026612	-0.0160173	-0.210239	-0.431076	-0.189825	-1.1378	0.915177	0.0284532	1.2513e-06	0.0570015	5.87777e-32	2		NF60_DORPE	3e-67	60 kDa neurofilament protein
SMED30026622	0.395416	-0.101137	0.23783	-0.436594	-2.25775	0.0518226	0.690257	0.32364	0.0303349	1.24708e-16	2	Y	GCNT1_MOUSE	4e-53	Beta-1,3-galactosyl-O-glycosyl-glycoprotein beta-1,6-N-acetylglucosaminyltransferase
SMED30026629	-0.174961	-0.601228	-0.246401	-0.543689	-0.50586	0.0179957	1.98216e-21	0.000489057	1.92906e-17	4.61204e-12	1		RRP12_MOUSE	2e-11	RRP12-like protein [Mus musculus]
SMED30026646	-0.581478	-0.685898	-0.240963	-0.640268	-1.00125	3.77898e-11	2.68537e-15	0.0163512	3.32182e-13	1.2327e-23	1		DYL2_CAEEL	3e-10	Probable dynein light chain 2, cytoplasmic [Caenorhabditis elegans]
SMED30026658	-0.225805	-0.415874	-0.370726	-0.469378	-0.605528	0.00399844	7.74882e-09	6.4858e-07	8.53568e-11	9.41277e-14	2
SMED30026659	0.249728	0.0953068	0.245415	-0.0856755	-0.941111	0.0259338	0.46691	0.0318618	0.54248	3.21798e-14	2		RIR2B_HUMAN	1e-29	Ribonucleoside-diphosphate reductase subunit M2 B
SMED30026660	0.00420812	-0.42209	-0.320305	-0.731129	-1.01687	0.988326	2.0407e-05	0.00381462	1.14236e-13	1.01588e-18	2		NSUN2_XENTR	9e-173	tRNA (cytosine(34)-C(5))-methyltransferase
SMED30026668	0.157926	-0.369586	-0.423672	-0.886066	-0.94413	0.25609	0.00118115	0.000506943	4.16542e-15	9.93471e-13	2	Y	COQ7_HUMAN	6e-81	Ubiquinone biosynthesis protein COQ7 homolog
SMED30026669	-0.164878	-0.396095	-0.0032312	-0.0504756	0.264758	0.00505834	5.69117e-14	0.977861	0.495916	8.18967e-06	3		WSB1_XENTR	5e-36	WD repeat and SOCS box-containing protein 1
SMED30026675	-3.33625	-3.50968	-2.36102	-2.82629	-2.74615	1.46663e-14	1.10193e-13	2.06226e-10	5.34397e-11	1.84709e-06	3
SMED30026736	-0.534912	-0.891601	0.400297	0.355981	0.417963	1.23022e-17	3.06368e-48	3.57929e-11	2.0573e-09	1.27791e-10	3		MTAP_DANRE	9e-98	S-methyl-5'-thioadenosine phosphorylase
SMED30026747	-0.572347	-0.695248	-0.23025	-0.396655	-0.310842	3.70645e-09	5.50632e-14	0.0352856	3.28718e-05	0.00549206	3		MPPD1_HUMAN	2e-59	Metallophosphoesterase domain-containing protein 1
SMED30026757	-1.28886	-1.24621	-2.64185	-2.39953	-2.47473	1.45633e-30	4.05914e-27	3.72967e-92	4.09371e-72	2.67338e-48	1	Y	CP2A3_RAT	4e-35	Cytochrome P450 2A3
SMED30026763	-0.187492	0.344504	-2.81372	-2.98701	-2.15869	0.501753	0.151475	1.56853e-23	1.63277e-19	3.51198e-08	2
SMED30026781	-0.216467	-0.351493	-0.171858	-0.2093	-0.168949	2.10346e-05	5.37677e-14	0.0011468	1.79572e-05	0.00262467	3		SETB1_DROPS	3e-79	Histone-lysine N-methyltransferase eggless
SMED30026803	0.284185	-0.072395	-1.04865	-1.89155	-2.70985	0.21715	0.800509	7.6041e-07	2.30633e-17	8.46109e-20	2
SMED30026809	0.666635	0.186787	-0.891839	-1.27005	-1.6767	1.68183e-22	0.0187196	1.20794e-31	6.09514e-59	2.90385e-67	2		SC6A9_XENLA	7e-138	Sodium- and chloride-dependent glycine transporter 1
SMED30026812	-4.15444	-8.18907	-1.86883	-2.54985	-2.29702	2.06895e-65	9.93201e-99	1.18395e-21	6.03687e-35	2.03903e-22	1
SMED30026815	-0.232291	-0.329115	-0.348666	-0.903281	-1.32286	0.135444	0.014997	0.0156722	1.1356e-11	6.02037e-16	2		WDR4_XENTR	1e-22	tRNA (guanine-N(7)-)-methyltransferase non-catalytic subunit wdr4
SMED30026836	-0.4807	-0.428608	-0.280795	-0.318536	-0.26157	2.28929e-30	9.08111e-25	7.02034e-11	6.34394e-14	7.15871e-08	1		AP3B2_HUMAN	0	AP-3 complex subunit beta-2
SMED30026842	-1.42486	-1.54635	-0.640919	-0.739033	-0.792831	6.09799e-55	4.68643e-62	5.72721e-15	1.79886e-18	6.70056e-16	1		YHJX_ECOLI	1e-07	Uncharacterized MFS-type transporter YhjX [Escherichia coli K-12]
SMED30026889	-0.815267	-0.928347	-0.949614	-0.916029	-0.712342	8.73797e-15	5.72856e-19	2.1329e-19	3.48011e-18	6.32433e-09	1		RAB10_DIPOM	1e-64	Ras-related protein Rab-10
SMED30026906	-2.12523	-2.98751	-2.62969	-2.61676	-2.42382	2.68386e-22	1.4049e-30	2.08562e-30	1.75281e-26	3.57807e-17	1
SMED30026924	-0.868765	-0.596438	-1.11775	-1.02114	-0.705149	3.76281e-15	1.0916e-07	5.70207e-24	2.49063e-20	3.44784e-08	1
SMED30026979	-0.277213	-0.356699	-0.333232	-0.446981	-0.587257	0.000138975	3.28944e-07	3.95191e-06	1.28539e-10	4.30306e-14	2		RS11_XENLA	1e-61	40S ribosomal protein S11 [Xenopus laevis]
SMED30027013	0.010881	0.135006	-1.54009	-1.54539	-2.61898	0.984236	0.673634	1.36891e-09	1.07058e-08	4.24863e-14	2
SMED30027025	-0.716514	-0.905264	-0.462761	-0.601138	-0.498466	8.98921e-22	1.28624e-34	1.19035e-09	5.25554e-16	4.00646e-09	1		AR6P1_MOUSE	6e-13	ADP-ribosylation factor-like protein 6-interacting protein 1
SMED30027034	-5.59002	-8.7601	-1.87039	-2.50001	-2.49841	3.91854e-119	4.28749e-167	6.06829e-22	7.1625e-37	3.32954e-27	1	Y	LCYD1_ORYSJ	1e-36	Putative L-cysteine desulfhydrase 1
SMED30027076	-1.07544	-1.14939	0.00803701	-0.17168	-0.645468	1.17781e-38	1.63418e-46	0.958623	0.0488381	1.03923e-12	3		ALO_CANAL	3e-11	D-arabinono-1,4-lactone oxidase
SMED30027137	-1.11733	-2.08734	-3.1595	-3.57946	-3.93937	5.1881e-09	6.98847e-24	4.3699e-38	2.53324e-43	2.32323e-28	1
SMED30027148	-1.24097	-1.17599	-1.41852	-1.42529	-0.7717	4.47153e-44	1.10742e-38	1.35979e-56	1.80865e-53	1.14543e-13	1		IDHC_MICOH	0	Isocitrate dehydrogenase [NADP] cytoplasmic
SMED30027156	-2.69342	-2.86881	-2.44915	-2.67783	-3.63854	1.46084e-89	3.31036e-98	2.54279e-76	2.7931e-87	4.46242e-97	1	Y
SMED30027157	1.95581	2.69025	-1.93598	-2.38172	2.56238	6.49135e-16	2.02505e-31	1.0825e-09	1.1051e-14	7.86317e-23	2
SMED30027178	-1.02138	-0.879072	0.0391344	-0.501215	-0.188002	3.3673e-49	4.25902e-38	0.731308	3.34761e-13	0.0298835	3		MRP1_RAT	0	Multidrug resistance-associated protein 1
SMED30027207	-0.0785139	0.0520385	-1.17815	-1.35272	-1.93442	0.44323	0.622852	1.72142e-55	9.0903e-71	5.52685e-94	2	Y	DCOR1_XENLA	1e-83	Ornithine decarboxylase 1
SMED30027213	-0.489371	-0.650371	-0.283579	-0.412831	-0.270819	1.22991e-09	7.17171e-17	0.000767223	1.83147e-07	0.00438722	3		MFS7A_XENTR	6e-62	Major facilitator superfamily domain-containing protein 7-a [Xenopus (Silurana) tropicalis]
SMED30027218	0.131649	-0.233423	-0.329735	-0.771002	-0.487694	0.152565	0.00233614	4.64912e-05	1.00797e-25	1.74669e-08	2		RPC2_DROME	0	DNA-directed RNA polymerase III subunit RPC2
SMED30027243	-3.41196	-5.77402	-1.27879	-1.94094	-1.40906	2.81001e-121	1.1046e-184	1.68956e-27	2.12884e-53	2.96141e-23	1	Y	LOL2A_DANRE	3e-68	Lysyl oxidase homolog 2A
SMED30027244	-0.61596	-0.810131	-0.188041	-0.190228	-1.0224	2.01472e-09	4.40884e-16	0.130208	0.104403	3.9328e-19	1
SMED30027266	-2.23467	-2.35674	-1.57833	-1.89206	-2.3235	6.13143e-59	1.30586e-62	7.01316e-37	5.62497e-46	2.29302e-43	1	Y
SMED30027280	-0.209401	-0.331749	-0.237657	-0.387948	-0.533399	0.00129666	4.84606e-08	0.000255653	1.75374e-10	3.32988e-15	2		RLA0_DROME	6e-93	60S acidic ribosomal protein P0
SMED30027285	0.606072	-0.045741	-0.49437	-1.41895	-2.59607	0.00251328	0.880805	0.057235	6.63349e-09	8.01927e-16	2
SMED30027288	-1.80734	-2.92516	0.587375	0.704765	0.507136	2.72168e-22	8.55677e-43	2.14254e-05	6.09564e-08	0.000653687	3
SMED30027296	-2.38914	-3.59083	-0.78404	-1.15301	-1.07925	1.55949e-102	1.64683e-205	1.65406e-12	2.28644e-26	4.79752e-18	1	Y	PANK1_ORYSJ	3e-18	Pantothenate kinase 1
SMED30027319	-1.04336	-2.01745	-0.867323	-1.27311	-0.880487	2.5067e-14	5.73685e-41	2.30658e-10	2.47882e-19	5.50865e-08	1		ATX1_MOUSE	2e-14	Ataxin-1
SMED30027343	0.138016	-0.145276	-0.901965	-0.882033	-0.570219	0.287919	0.245913	1.81937e-16	2.84859e-16	9.31588e-06	2		Y683_RICTY	3e-09	Uncharacterized protein RT0683 [Rickettsia typhi str. Wilmington]
SMED30027349	-0.701725	-0.513356	-0.593856	-0.79507	-0.530104	2.3112e-16	3.23907e-09	1.17778e-11	1.84543e-20	9.61757e-08	1		SAP_CHICK	1e-09	Proactivator polypeptide
SMED30027350	-4.13962	-6.21455	-1.45893	-1.87554	-2.62195	2.80852e-51	2.32056e-56	3.44648e-14	7.95987e-18	1.79759e-19	1		NTCP2_MOUSE	3e-11	Ileal sodium/bile acid cotransporter
SMED30027355	-0.685058	-0.952131	-0.36106	-0.328733	-0.249286	4.41094e-28	6.66549e-53	2.66251e-08	3.52535e-07	0.000867028	3		DHSO_CHICK	5e-122	Sorbitol dehydrogenase
SMED30027419	0.397578	0.176078	-0.19884	-1.01417	-2.49086	6.23981e-05	0.108523	0.111639	8.26601e-22	8.4984e-61	2		MSH6_MOUSE	0	DNA mismatch repair protein Msh6
SMED30027539	-1.37738	-1.10476	-2.70685	-3.01619	-3.28842	1.05477e-11	2.95763e-07	2.5138e-31	1.82369e-28	1.90265e-24	2		SVOPL_DANRE	6e-48	Putative transporter SVOPL
SMED30027550	-0.333915	-0.860673	-0.608855	-1.01032	-0.79277	0.00259914	3.36316e-18	7.62515e-09	6.52978e-24	5.11962e-12	1		TRM6_MOUSE	3e-58	tRNA (adenine(58)-N(1))-methyltransferase non-catalytic subunit TRM6
SMED30027566	0.267411	-0.0699494	-0.214343	-0.94135	-2.6857	0.0449918	0.692631	0.15899	5.069e-13	1.40973e-44	2
SMED30027587	-1.93048	-4.4719	-2.02837	-3.04286	-2.35658	6.71008e-48	6.0559e-145	2.52331e-52	9.34612e-93	3.77461e-46	1		FRI3_LITCT	2e-23	Ferritin, lower subunit
SMED30027595	-1.83943	-3.4018	-0.988584	-1.61405	-1.38407	1.67114e-58	3.13213e-156	8.548e-19	9.32853e-47	2.34604e-26	1		NATT4_THANI	6e-05	Natterin-4
SMED30027652	-0.184727	-0.206693	-0.561289	-0.739652	-1.18838	0.154156	0.0934841	3.75766e-07	1.6491e-11	5.40502e-21	2		DDX55_HUMAN	2e-97	ATP-dependent RNA helicase DDX55
SMED30027672	0.2475	0.365716	0.0249475	-0.452025	-1.00673	0.0355942	0.000785763	0.8985	4.42325e-05	7.37687e-16	2		PL8L1_HUMAN	6e-12	PLAC8-like protein 1 [Homo sapiens]
SMED30027697	-0.672596	-0.655034	0.0407521	0.241883	0.333159	2.5396e-16	3.12609e-15	0.766647	0.00559025	0.000379517	3		ATIF1_HUMAN	0.0008	ATPase inhibitor, mitochondrial
SMED30027712	-1.26365	-2.60189	-1.15975	-0.884161	-0.750581	4.02379e-17	3.0563e-44	2.55951e-15	4.72546e-09	6.87461e-05	1		BIR7A_XENLA	3e-06	Baculoviral IAP repeat-containing protein 7-A
SMED30027797	-2.74053	-5.7055	-1.20342	-1.86984	-2.01289	8.55602e-63	1.14649e-117	1.24676e-18	1.45457e-36	7.46054e-30	1
SMED30027855	-1.1352	-1.8525	-0.417677	-0.542567	-0.38168	4.21416e-50	4.84956e-122	9.77475e-08	9.80112e-13	1.37118e-05	3		ASPD_DANRE	3e-67	Putative L-aspartate dehydrogenase
SMED30027856	-2.87631	-3.35708	-0.945203	-1.17985	-1.28753	7.47917e-17	8.69805e-16	0.000536244	0.000185346	4.78115e-05	3		ANK1_HUMAN	2e-15	Ankyrin-1
SMED30027867	-1.70084	-1.77545	-0.943392	-0.99459	-1.09939	3.79128e-17	9.45054e-17	1.68144e-07	2.87045e-07	3.62781e-07	3
SMED30027872	-1.21096	-1.52439	-0.635777	-0.668359	-0.553729	3.55658e-11	1.81821e-14	0.000258416	0.00030182	0.00846753	3
SMED30027899	-1.1844	-1.20181	-0.922699	-0.862335	-0.733914	2.01084e-29	3.46615e-32	1.1759e-19	4.29406e-18	7.99526e-10	1		S26A5_HUMAN	4e-41	Prestin
SMED30027904	0.0131607	-0.325552	-0.213059	-0.458663	-0.61503	0.901184	7.44356e-08	0.00124841	2.47589e-14	2.96329e-19	2		PRP19_BOVIN	0	Pre-mRNA-processing factor 19
SMED30027927	0.0377715	-0.121252	-0.126062	-0.397893	-0.497029	0.641966	0.0452878	0.0483629	9.93689e-14	1.74296e-16	2		PTBP1_BOVIN	9e-54	Polypyrimidine tract-binding protein 1
SMED30027942	-3.38265	-5.46629	-3.46933	-4.70167	-4.30585	1.82209e-58	1.27511e-112	1.83288e-60	7.80649e-93	1.21593e-57	1	Y
SMED30027966	-2.3809	-2.85935	-0.607118	-1.01279	-0.694692	3.66258e-35	3.18209e-43	0.000202	1.00346e-09	0.000247812	3		ANR44_HUMAN	7e-05	Serine/threonine-protein phosphatase 6 regulatory ankyrin repeat subunit B
SMED30027968	-0.378024	-0.561948	0.116213	0.146537	0.255675	1.0333e-10	4.98072e-23	0.105505	0.0248933	0.00012257	3		PAPSS_URECA	0	Bifunctional 3'-phosphoadenosine 5'-phosphosulfate synthase
SMED30027991	-0.382368	-0.599228	-0.475712	-0.544164	-0.531394	8.46119e-10	5.95285e-23	1.86086e-14	8.69307e-19	3.48366e-14	1		L2HDH_NEMVE	0	L-2-hydroxyglutarate dehydrogenase, mitochondrial
SMED30027997	-0.37203	-0.536155	-0.359769	-0.351927	-0.503501	1.00978e-10	2.00426e-21	5.93205e-10	1.10935e-09	1.07413e-14	1		CPT1A_HUMAN	0	Carnitine O-palmitoyltransferase 1, liver isoform
SMED30028002	-0.36857	-0.597182	-0.264125	-0.293792	-0.411241	8.99834e-08	5.98388e-19	0.00021946	2.41203e-05	1.18614e-07	3		3HIDH_MOUSE	1e-95	3-hydroxyisobutyrate dehydrogenase, mitochondrial
SMED30028012	-0.870822	-1.00442	-0.207457	-0.0108233	-0.324328	2.96566e-11	7.01695e-16	0.153696	0.959702	0.021842	3
SMED30028015	-0.636465	-0.643025	-0.167158	-0.164968	-0.0867012	1.17412e-22	1.9057e-23	0.0224119	0.0214831	0.361909	3		KPYM_CHICK	0	Pyruvate kinase PKM [Gallus gallus]
SMED30028026	-0.17567	-0.618135	-0.273288	-0.587971	-0.452902	0.00772414	8.09504e-27	1.27827e-05	5.79437e-24	1.11553e-11	1		ABI2_MOUSE	5e-27	Abl interactor 2
SMED30028039	-1.88745	-2.27814	-0.79135	-0.99413	-0.565829	1.844e-58	2.79663e-76	1.29254e-13	6.87475e-20	4.41995e-06	1		SEM1A_CAEEL	5e-11	Semaphorin-1A
SMED30028041	-0.796822	-0.766671	-0.506379	-0.681354	-0.435302	8.51945e-24	2.77625e-21	1.78009e-10	6.09225e-17	5.25934e-06	1		TMC7_CHICK	5e-33	Transmembrane channel-like protein 7 [Gallus gallus]
SMED30028080	-1.05002	-1.57458	-0.414847	-0.690806	-0.479143	6.43331e-34	2.80567e-73	6.36921e-06	2.6646e-15	2.12964e-06	1		TRAF6_BOVIN	0.0004	TNF receptor-associated factor 6
SMED30028142	-2.01523	-2.27304	-3.24398	-3.4908	-4.16368	6.24629e-32	1.00911e-39	6.34512e-73	5.06893e-82	7.15091e-76	1	Y
SMED30028154	0.0839003	-0.124908	-0.324206	-1.30148	-2.20992	0.745736	0.590529	0.117173	7.70083e-13	5.80791e-21	2		STK33_MOUSE	3e-61	Serine/threonine-protein kinase 33 [Mus musculus]
SMED30028178	-0.884852	-1.23943	0.162506	0.532286	0.474111	1.11647e-09	7.8534e-16	0.379476	0.000138319	0.00437494	3
SMED30028179	0.0061126	-0.458385	-0.412944	-0.855926	-1.45147	0.982252	0.000189974	0.00102398	8.76676e-12	1.10431e-19	2		CCND2_RAT	2e-12	G1/S-specific cyclin-D2
SMED30028184	-0.51714	-0.785907	-0.430953	-0.46189	-0.225881	3.97168e-13	2.74588e-29	3.42197e-09	1.24325e-10	0.00982903	3		RAB32_MOUSE	3e-84	Ras-related protein Rab-32 [Mus musculus]
SMED30028218	0.254712	0.0037597	-0.209771	-1.04928	-1.72828	0.0796654	0.984019	0.202789	1.30959e-15	7.7447e-25	2		TOB1A_XENLA	3e-57	DNA topoisomerase 2-binding protein 1-A
SMED30028287	-1.31183	-1.15178	-2.21891	-2.05194	-2.58835	6.17326e-24	1.05649e-18	1.72196e-60	2.69868e-51	7.92651e-55	1	Y
SMED30028296	-0.69629	-1.03873	-0.0503637	0.153388	0.055041	3.57753e-09	4.16753e-19	0.792051	0.255455	0.769819	3		CAC1A_APIME	0	Voltage-dependent calcium channel type A subunit alpha-1
SMED30028299	0.252353	0.0174869	-0.378995	-0.705894	-0.916196	0.00107914	0.878123	1.05448e-06	5.42854e-21	9.44373e-25	2
SMED30028315	-0.19281	-0.428335	-0.670903	-0.919668	-1.27395	0.131582	0.000184861	9.33061e-10	1.30959e-15	1.64003e-21	2		ERCC1_BOVIN	2e-46	DNA excision repair protein ERCC-1 [Bos taurus]
SMED30028321	-0.317979	-0.158982	-3.93955	-3.60473	-3.9402	0.293887	0.64493	9.24523e-26	1.60878e-20	9.83139e-15	2		SYT1_PONAB	8e-08	Synaptotagmin-1
SMED30028341	-0.122815	-0.549011	-0.198347	-0.415697	-0.429414	0.129621	1.12465e-17	0.00778232	2.24124e-10	5.69531e-09	3		PRP16_HUMAN	0	Pre-mRNA-splicing factor ATP-dependent RNA helicase PRP16
SMED30028358	-0.613937	-0.464076	-0.63312	-0.519307	-0.384877	1.60777e-14	6.47741e-09	2.21078e-15	1.16716e-10	4.30985e-05	1		K319L_MOUSE	1e-09	Dyslexia-associated protein KIAA0319-like protein [Mus musculus]
SMED30028389	-0.399471	-0.539838	-0.484368	-0.771774	-0.567773	1.27382e-05	1.91695e-10	7.3842e-08	4.32082e-19	4.97457e-09	2		CERK1_MOUSE	3e-105	Ceramide kinase
SMED30028401	-1.8311	-2.54364	-0.573927	-0.666276	-0.231569	1.55807e-105	7.49861e-186	8.5643e-12	9.32588e-16	0.026634	1		UNC9_CAEEL	1e-82	Innexin unc-9
SMED30028415	0.0493902	-0.218023	-0.562363	-0.963548	-1.81196	0.774664	0.0885807	1.11047e-06	4.35392e-16	4.20483e-32	2		RFC2_CHICK	1e-108	Replication factor C subunit 2
SMED30028416	-2.66713	-4.67454	-1.54345	-2.00183	-1.7445	8.19097e-54	3.49319e-97	2.79679e-23	3.98127e-34	5.61294e-20	1		AZET_SCHPO	3e-25	L-azetidine-2-carboxylic acid acetyltransferase [Schizosaccharomyces pombe 972h-]
SMED30028423	-0.188749	-0.537864	0.00572918	-0.254544	-0.0197077	0.00480666	1.10712e-19	0.963488	5.51952e-05	0.858489	3		LMLN_MOUSE	3e-67	Leishmanolysin-like peptidase [Mus musculus]
SMED30028428	0.138114	-0.0687131	-0.315532	-0.676803	-1.02026	0.259468	0.621455	0.00346456	2.7055e-11	3.83625e-18	2	Y	PARP1_CHICK	0	Poly [ADP-ribose] polymerase 1
SMED30028449	-0.301475	-0.473733	-0.257339	-0.352564	-0.301095	2.79571e-10	1.31228e-24	1.69898e-07	9.75932e-14	2.30916e-08	1		VIGLN_MOUSE	0	Vigilin
SMED30028453	-0.935075	-1.42606	-0.154613	-0.364694	-0.0694699	8.8972e-33	8.94116e-73	0.119342	9.54449e-06	0.587099	3		LYAG_RAT	0	Lysosomal alpha-glucosidase
SMED30028472	-0.201537	-0.567029	-0.429668	-0.890802	-0.955848	0.0894142	9.03871e-09	4.86868e-05	6.59955e-19	1.63755e-15	2		RBM15_HUMAN	5e-32	Putative RNA-binding protein 15
SMED30028483	-0.958237	-0.74218	-0.281783	-0.310644	-0.335623	3.35816e-16	8.62494e-11	0.0217476	0.0095582	0.00810479	3		Y4251_DICDI	4e-41	Probable serine/threonine-protein kinase DDB_G0284251 [Dictyostelium discoideum]
SMED30028488	-0.738773	-1.03945	-0.197305	-0.262608	-0.246993	4.99485e-15	3.01966e-28	0.0673792	0.00786828	0.0331942	3
SMED30028489	-0.493022	-0.347064	-0.0823389	-0.0414681	-0.366987	4.82481e-18	9.89164e-10	0.262312	0.613697	3.22882e-08	3		PCTL_MOUSE	4e-53	PCTP-like protein
SMED30028506	-1.40124	-2.03014	-1.86329	-2.65066	-3.40707	1.79647e-06	1.77894e-12	8.27491e-10	6.38857e-17	5.15311e-14	2
SMED30028512	-1.89314	-2.90697	-0.331429	-0.415021	-0.789414	1.61734e-51	1.17064e-105	0.0192296	0.0017776	3.44589e-08	3
SMED30028526	-2.46273	-3.21793	-0.661633	-0.715612	-0.864472	7.2319e-62	7.14023e-80	1.09216e-07	2.57246e-08	4.09296e-09	3
SMED30028549	0.113036	-0.144699	-0.760446	-1.26006	-3.08635	0.554196	0.441111	2.80787e-07	2.88118e-15	1.35242e-36	2		ARMC1_HUMAN	4e-12	Armadillo repeat-containing protein 1 [Homo sapiens]
SMED30028569	-0.766683	-0.557252	-0.139037	-0.13507	0.190744	9.09943e-14	4.54749e-08	0.281501	0.283863	0.134913	3		FMO1_CANFA	1e-14	Dimethylaniline monooxygenase [N-oxide-forming] 1
SMED30028574	-1.50679	-2.23546	-0.465971	-0.953172	-1.06996	3.8513e-69	5.47833e-143	1.15247e-07	5.60453e-30	9.44232e-29	1	Y	CP2B4_RABIT	3e-70	Cytochrome P450 2B4
SMED30028606	-0.0289413	-0.42428	-0.40902	-0.595709	-0.845978	0.819134	1.61691e-08	2.30317e-07	2.18098e-15	7.97824e-23	2		NOP56_HUMAN	3e-132	Nucleolar protein 56
SMED30028611	-3.34171	-7.46431	-1.46099	-1.98043	-1.45425	3.33668e-67	3.05673e-178	1.79714e-15	3.39512e-27	5.71594e-12	1		AL8A1_HUMAN	4e-173	Aldehyde dehydrogenase family 8 member A1
SMED30028615	-0.316332	-0.541969	-0.278654	-0.378786	-0.26837	3.37585e-06	1.7331e-17	6.39999e-05	6.7081e-09	0.00042108	3		V155_FOWPN	4e-12	Putative ankyrin repeat protein FPV115 [Fowlpox virus strain NVSL]
SMED30028622	0.0810988	-0.192365	-0.193338	-0.463027	-0.674044	0.359053	0.00691102	0.0103795	5.40439e-12	2.36781e-17	2		LDL1_ARATH	3e-29	Lysine-specific histone demethylase 1 homolog 1
SMED30028625	-0.343908	-0.757407	-0.960149	-1.53505	-1.90801	0.0124811	1.78764e-09	1.56994e-13	6.27371e-30	7.39777e-29	2		PMS1_HUMAN	2e-45	PMS1 protein homolog 1
SMED30028641	-0.674609	-0.730159	-0.633074	-0.811309	-0.500939	1.0983e-10	1.0111e-12	1.61275e-09	4.86714e-15	3.74483e-05	2		SNX24_RAT	1e-14	Sorting nexin-24 [Rattus norvegicus]
SMED30028664	-1.04631	-1.44641	-0.271761	-0.313285	-0.354211	6.69149e-52	3.08764e-91	7.6752e-05	3.07456e-06	2.70347e-06	3		TPC1_MOUSE	2e-21	Two pore calcium channel protein 1
SMED30028665	0.866213	0.564514	0.00808334	-0.792178	-2.14544	1.31492e-07	0.00197894	0.983706	0.000180306	8.38918e-14	2		RSSA_XENTR	2e-82	40S ribosomal protein SA
SMED30028674	-1.97659	-2.92014	-0.937154	-1.75656	-4.56015	1.24832e-07	1.05741e-12	0.00962249	1.5288e-06	1.23299e-14	2
SMED30028689	0.152755	-0.14818	-0.209217	-0.627448	-0.808886	0.0639398	0.0666779	0.00870972	4.24139e-19	2.58854e-23	2		RBBP4_HUMAN	0	Histone-binding protein RBBP4
SMED30028698	-0.315239	-0.859408	-0.0557962	-0.665595	-0.894358	0.00187567	7.08263e-22	0.707671	8.57163e-14	7.11759e-17	1
SMED30028724	-0.201164	-0.468159	-0.195243	-0.269391	-0.282498	0.000639073	3.59298e-18	0.00109643	1.43997e-06	7.36089e-06	3		MIRO1_DANRE	0	Mitochondrial Rho GTPase 1-A
SMED30028764	-1.93028	-2.88323	-0.814256	-1.03801	-0.895101	7.66248e-46	1.44102e-85	3.48668e-12	8.88584e-20	1.49647e-11	1		ANR52_DANRE	2e-07	Serine/threonine-protein phosphatase 6 regulatory ankyrin repeat subunit C
SMED30028793	-1.08222	-1.98137	-0.591133	-0.875651	-0.859991	1.43558e-31	8.34338e-90	3.25236e-10	7.41405e-21	1.97226e-15	1		S28A3_EPTST	5e-122	Solute carrier family 28 member 3
SMED30028854	-0.516242	-0.587456	-0.501647	-0.395642	-0.306099	2.75457e-11	3.64703e-15	8.5075e-11	1.75932e-07	0.000623882	3		KOR2_ORYSJ	0.0004	Potassium channel KOR2
SMED30028856	-0.135351	-0.310732	-0.280165	-0.497716	-0.476747	0.0744095	1.77552e-06	3.39615e-05	6.86474e-15	5.8726e-11	2		KPCG_HUMAN	2e-19	Protein kinase C gamma type
SMED30028865	-0.0167326	-0.219054	-0.357419	-1.17675	-2.73188	0.964389	0.409239	0.157736	1.85982e-07	2.22926e-19	2		PSF3_HUMAN	9e-18	DNA replication complex GINS protein PSF3
SMED30028877	-1.19405	-1.58169	-0.247035	-0.291107	0.0857008	1.14522e-59	3.11365e-98	0.00194812	0.000154266	0.429849	3		EPHX4_HUMAN	7e-69	Epoxide hydrolase 4
SMED30028878	-2.12144	-3.41806	-0.0843717	-0.500996	-0.876159	5.85456e-48	2.13579e-107	0.618194	1.76e-06	4.59133e-11	3
SMED30028902	0.0751667	-0.156626	-0.433906	-0.680438	-1.03002	0.351884	0.0188241	2.14888e-12	1.99655e-29	3.56663e-48	2		RPOM_HUMAN	6e-157	DNA-directed RNA polymerase, mitochondrial
SMED30028914	0.191542	0.0925179	-0.108197	-0.30658	-0.572146	0.00149047	0.168423	0.129172	1.09601e-07	1.27339e-18	2		PHR_POTTR	0	Deoxyribodipyrimidine photo-lyase
SMED30028939	-0.327202	-0.824739	-0.606023	-0.798883	-1.19029	0.0224656	1.93732e-10	6.36921e-06	8.74749e-10	1.14166e-14	2		FMT_HUMAN	4e-53	Methionyl-tRNA formyltransferase, mitochondrial
SMED30028957	-0.607763	-0.5353	0.0644468	0.0617305	0.309527	4.02568e-18	1.18091e-14	0.517428	0.5145	6.32492e-05	3		FMAR_DROME	0.0009	FMRFamide receptor
SMED30028981	-2.45569	-3.0562	-4.50133	-6.93773	-7.16434	9.01005e-10	1.44777e-08	1.4018e-17	6.341e-14	2.16716e-11	2
SMED30028995	-1.3878	-1.33889	-1.09035	-0.937593	-1.10364	1.06518e-28	4.71487e-27	1.81357e-20	2.69325e-15	3.27282e-13	1		TTPAL_MOUSE	4e-18	Alpha-tocopherol transfer protein-like [Mus musculus]
SMED30029002	-1.02146	-1.83328	-0.332508	-0.540571	-0.293582	1.19669e-24	6.59812e-57	0.000502504	2.86278e-08	0.00987553	3		MYCT_MOUSE	1e-63	Proton myo-inositol cotransporter
SMED30029006	-0.842384	-0.694091	0.0228315	-0.0595171	-0.351361	8.19186e-15	2.13347e-11	0.906194	0.699289	0.00472799	3		LITAF_CHICK	3e-10	Lipopolysaccharide-induced tumor necrosis factor-alpha factor homolog
SMED30029010	-0.490397	-0.760525	-0.898266	-1.22091	-1.24619	1.42786e-06	8.86088e-15	8.45151e-19	2.90891e-32	1.77878e-23	1		PCP_MOUSE	3e-120	Lysosomal Pro-X carboxypeptidase
SMED30029019	-0.0876595	-0.0350772	-0.22787	-0.115134	-0.910824	0.486909	0.801141	0.0285561	0.331217	1.78842e-19	2		SM16_SCHMA	3e-20	16 kDa calcium-binding protein
SMED30029055	-1.22567	-2.10451	0.172199	0.193829	0.217098	1.20594e-26	1.04917e-69	0.231974	0.141567	0.130664	3		IPHP_NOSCO	6e-05	Tyrosine-protein phosphatase
SMED30029075	-0.362071	-0.266475	-0.354153	-0.194604	-0.650397	5.20554e-09	1.71695e-05	1.43738e-08	0.00286942	3.41907e-21	2		TRPM7_HUMAN	4e-86	Transient receptor potential cation channel subfamily M member 7
SMED30029080	-0.895393	-0.704647	0.0779123	0.469674	-0.368893	1.59167e-17	1.10106e-10	0.587161	9.70638e-07	0.0037258	3		TSTD1_HUMAN	4e-15	Thiosulfate sulfurtransferase/rhodanese-like domain-containing protein 1 [Homo sapiens]
SMED30029096	-0.280498	-0.644908	-0.31733	-0.478159	-0.219124	4.64075e-05	8.31485e-24	3.74958e-06	2.12293e-13	0.00577365	3		S38A7_DANRE	6e-37	Putative sodium-coupled neutral amino acid transporter 7
SMED30029098	-1.05784	-1.47229	-0.765717	-0.942933	-1.05139	3.59749e-48	3.07426e-93	2.11718e-26	6.68004e-41	8.3387e-39	1	Y	HEM6_DROME	1e-137	Oxygen-dependent coproporphyrinogen-III oxidase
SMED30029100	-0.784424	-1.05352	-0.228049	-0.411836	0.0304457	2.72447e-14	1.67568e-28	0.0420096	9.83476e-06	0.851432	3		RAB32_HUMAN	1e-71	Ras-related protein Rab-32 [Homo sapiens]
SMED30029103	-1.12333	0.0574797	-0.761844	-0.754649	0.449249	4.2398e-22	0.74493	1.72303e-10	1.678e-10	0.000952219	3		GLNA_PANAR	0	Glutamine synthetase
SMED30029111	-0.551504	-0.525972	-0.35653	-0.51491	-0.314385	2.98946e-31	1.88238e-29	1.28953e-13	7.02917e-28	8.45023e-09	1		CLCN7_MOUSE	3e-155	H(+)/Cl(-) exchange transporter 7
SMED30029153	-0.531298	-0.483541	-0.356149	-0.578672	-0.353202	6.59008e-15	2.78911e-13	3.07204e-07	4.38921e-18	5.30542e-06	1		GSH1_HUMAN	0	Glutamate--cysteine ligase catalytic subunit
SMED30029159	-1.31396	-1.5111	-1.06957	-1.1628	-1.869	2.92097e-42	3.14141e-55	4.23066e-28	3.59384e-33	1.86356e-60	1
SMED30029168	-1.55705	-1.30297	-1.01116	-1.05567	-1.07655	2.8109e-24	1.57512e-17	6.88176e-13	1.62838e-12	3.39237e-11	3
SMED30029170	-1.79225	-1.51808	-0.64136	-0.915827	-1.0964	2.50983e-28	1.59978e-17	2.7316e-05	9.53367e-08	8.65521e-08	3		YS11_DROME	1e-24	Putative gamma-glutamylcyclotransferase CG2811 [Drosophila melanogaster]
SMED30029180	-0.259464	-0.65302	-0.504306	-0.772494	-0.772497	0.000143321	3.20517e-25	9.45363e-15	3.34282e-34	1.49348e-26	1		PAPOG_HUMAN	4e-105	Poly(A) polymerase gamma
SMED30029195	-0.407525	-0.514066	-0.346647	-0.201548	-0.172264	3.35647e-16	6.78354e-26	8.80674e-12	0.000114273	0.00418698	3		BDLP_NOSP7	1e-11	Bacterial dynamin-like protein
SMED30029203	0.264105	-0.113958	-0.00402415	-0.595841	-1.27235	0.0141606	0.369239	0.985441	2.42809e-09	1.19282e-26	2
SMED30029305	-1.7471	-2.52791	-0.782793	-1.33481	-1.13199	8.47464e-44	2.58166e-69	3.54563e-11	5.72347e-26	5.4422e-15	1
SMED30029328	-1.12852	-1.48667	-0.542591	-0.587143	-0.796233	7.08898e-20	1.86844e-30	4.27466e-06	8.80368e-07	5.72629e-09	3		MRP1_MACFA	2e-58	Multidrug resistance-associated protein 1
SMED30029333	-0.924249	-0.821934	-0.243567	-0.0223781	0.115626	4.19453e-29	8.58327e-23	0.00348139	0.862659	0.296175	3		Y3800_DICDI	1e-08	Ankyrin repeat, bromo and BTB domain-containing protein DDB_G0293800 [Dictyostelium discoideum]
SMED30029369	-2.44586	-2.54897	-1.16975	-1.07509	-1.15019	1.38136e-62	9.75067e-63	2.52022e-18	4.60466e-15	8.00477e-14	1		YPT6_YEAST	1e-16	GTP-binding protein YPT6 [Saccharomyces cerevisiae S288c]
SMED30029442	-1.69872	-2.46914	-0.592345	-0.888678	-0.374454	9.48997e-93	4.95709e-170	2.01855e-14	6.1501e-31	3.12675e-05	1		LET23_CAEEL	3e-110	Receptor tyrosine-protein kinase let-23
SMED30029450	-0.152369	-0.29768	-1.56741	-1.62854	-2.13631	0.227565	0.00572062	3.5858e-55	6.51877e-58	1.7948e-67	2		SCOT1_PIG	4e-45	Succinyl-CoA:3-ketoacid coenzyme A transferase 1, mitochondrial
SMED30029460	-1.41368	-1.77505	-0.906531	-1.13421	-0.834481	1.23972e-09	2.33298e-14	7.12129e-05	3.39012e-07	0.00111398	3
SMED30029485	-1.18528	-2.09251	-0.458693	-0.774482	-0.24173	3.97106e-29	3.04903e-76	2.98864e-05	4.15355e-13	0.0811867	3		EXC4_CAEEL	2e-19	Chloride intracellular channel exc-4
SMED30029494	-0.428944	-0.600197	-0.419761	-0.830161	-1.22604	6.80432e-06	5.59786e-11	1.33824e-05	2.28982e-19	2.26964e-30	2		HSP7C_DANRE	4e-64	Heat shock cognate 71 kDa protein
SMED30029500	-0.78976	-0.781788	-0.50865	-0.320289	-0.329677	3.18415e-20	5.43648e-20	9.56542e-09	0.000484013	0.00147671	3		SERC_RABIT	1e-138	Phosphoserine aminotransferase
SMED30029507	-0.282047	-0.439127	-0.325208	-0.485318	-0.665808	2.64384e-05	6.43139e-12	1.24337e-06	4.35866e-14	2.84341e-20	2		RL12_CAEBR	4e-75	60S ribosomal protein L12 [Caenorhabditis briggsae]
SMED30029523	0.069108	-0.124029	-0.114097	-0.345147	-0.370158	0.23454	0.0120093	0.0322923	2.16447e-14	6.12695e-13	2		SF3B3_DANRE	0	Splicing factor 3B subunit 3 [Danio rerio]
SMED30029533	-0.60432	-0.699182	-0.254667	-0.234422	-0.386011	5.27809e-20	2.72151e-27	0.000280602	0.000650474	3.52529e-07	3		IMT2_SCHPO	5e-25	Inositol phosphoceramide mannosyltransferase 2
SMED30029546	-0.379474	-0.367999	0.18615	-0.0418772	-0.586852	6.23015e-08	7.18568e-08	0.0157555	0.684148	3.58717e-14	2		TEKT3_HUMAN	6e-127	Tektin-3 [Homo sapiens]
SMED30029551	-1.07584	-1.22272	-0.5144	-0.550389	-0.684623	2.51118e-37	1.09506e-46	2.96322e-09	1.88167e-10	2.72724e-12	3		ACBP_CHICK	6e-34	Acyl-CoA-binding protein
SMED30029561	-1.21946	-1.19458	-1.7354	-1.71794	-2.07815	5.95863e-21	7.81851e-20	3.7231e-38	1.43496e-35	2.75271e-35	1
SMED30029583	-0.940134	-1.43862	-0.686188	-0.485148	-0.395617	4.24492e-12	8.47569e-25	6.22726e-07	0.000656142	0.0183565	3
SMED30029603	-0.532632	-0.636565	-0.357885	-0.357519	-0.16806	1.91848e-10	7.44711e-15	4.12595e-05	2.96665e-05	0.13053	3		FP1_MYTCO	8e-06	Adhesive plaque matrix protein
SMED30029626	0.333908	-1.12618	0.805376	0.345138	0.868075	0.020405	2.90133e-19	5.40746e-10	0.0150949	5.24172e-10	3		TYR3_CAEEL	2e-20	Putative tyrosinase-like protein tyr-3
SMED30029634	0.354283	0.301468	-0.323017	-0.683566	-1.60297	0.000375655	0.00248885	0.00311178	2.42424e-11	5.82917e-38	2		KIF15_STRPU	7e-105	Kinesin-like protein KIF15
SMED30029652	-0.29909	-0.651278	-0.488999	-0.620984	-0.760185	0.000581877	3.72266e-16	4.836e-09	1.62439e-14	8.93207e-17	1		RLP24_DANRE	4e-34	Probable ribosome biogenesis protein RLP24
SMED30029687	-0.77277	-1.2798	0.728204	0.673974	0.557058	9.83863e-07	8.847e-17	6.98202e-08	2.63905e-07	0.0002003	3		ATOH7_DANRE	2e-12	Protein atonal homolog 7
SMED30029698	-0.705313	-0.514925	-0.609203	-0.562562	-0.647845	1.93366e-27	4.41894e-15	1.82092e-20	1.88901e-17	7.53276e-18	1		CASP7_HUMAN	3e-65	Caspase-7
SMED30029717	-1.85004	-2.26909	-1.80541	-1.73749	-2.38838	5.59489e-17	3.11356e-21	6.84667e-17	9.88315e-15	2.64092e-16	1	Y
SMED30029728	-1.77084	-2.02416	-1.61439	-2.09131	-2.03046	5.61758e-19	5.1389e-29	1.73246e-17	4.22125e-30	9.87774e-22	1
SMED30029741	-0.232032	-0.316771	-0.468472	-0.622205	-0.982981	0.00205793	9.39577e-06	3.3378e-11	3.83721e-19	2.63979e-35	2
SMED30029814	-0.922308	-1.39236	-0.566699	-0.844925	-0.691739	1.25897e-29	1.58413e-65	1.55609e-11	4.58406e-25	1.32174e-13	1		S17A5_HUMAN	6e-109	Sialin
SMED30029823	-0.466142	-0.981655	-2.05034	-2.58189	-2.76965	0.00550942	5.8134e-11	1.14063e-29	2.26962e-45	2.42586e-29	2		SVOPL_DANRE	1e-52	Putative transporter SVOPL
SMED30029849	-1.71081	-1.93155	-0.754559	-0.938618	-0.606267	3.12629e-78	4.57051e-92	2.64442e-18	2.67701e-26	1.78582e-09	1		NCKX6_RAT	8e-44	Sodium/potassium/calcium exchanger 6, mitochondrial
SMED30029855	-0.08591	-0.203287	-0.335089	-0.471218	-0.652619	0.210413	0.000330274	1.47994e-09	4.29452e-18	1.07681e-25	2		HNRPF_MACFA	9e-49	Heterogeneous nuclear ribonucleoprotein F
SMED30029873	-0.613987	-0.889636	-1.20818	-1.16236	-1.29099	2.67871e-17	2.00862e-35	6.34539e-60	8.52736e-57	3.45061e-47	1	Y	EGR1_TAEGU	2e-27	Early growth response protein 1
SMED30029957	-0.324931	-0.450074	-0.807397	-0.819884	-0.941821	0.00377551	2.8404e-05	8.27223e-14	1.08241e-13	1.1934e-13	2		DUSTY_MOUSE	9e-46	Dual serine/threonine and tyrosine protein kinase
SMED30029962	-0.902984	-0.750304	-0.295535	0.0540903	0.126663	1.01567e-15	1.35186e-11	0.0137249	0.738679	0.429146	3
SMED30029973	0.217222	0.0123542	-0.203864	-0.614873	-1.31067	0.0198687	0.929371	0.0365829	1.3483e-13	2.13432e-43	2		RIR1_DROME	0	Ribonucleoside-diphosphate reductase large subunit
SMED30029980	0.284263	-0.176078	-0.377442	-1.21011	-2.7149	0.075248	0.323304	0.0194125	7.86891e-16	1.25332e-36	2		DUT_HUMAN	3e-66	Deoxyuridine 5'-triphosphate nucleotidohydrolase, mitochondrial
SMED30030013	-0.103819	-0.327783	-0.212149	-0.516168	-0.661221	0.23941	2.64254e-06	0.00585661	4.36499e-14	8.36907e-18	2		RAN_BRUMA	6e-125	GTP-binding nuclear protein Ran
SMED30030034	-0.422434	-0.673734	-0.836358	-0.97698	-1.01721	3.43843e-10	6.46834e-25	4.82064e-36	1.17376e-48	3.91464e-39	1		ARLY_MOUSE	0	Argininosuccinate lyase
SMED30030048	-3.0624	-4.39381	-0.626655	-1.1083	-1.06107	5.23201e-21	1.31704e-29	0.0269326	4.36134e-05	0.000538867	3
SMED30030116	-3.14262	-2.31012	-1.45047	-1.36619	-1.65459	5.11434e-32	4.02887e-19	5.88744e-13	1.56135e-09	1.77218e-08	3
SMED30030128	-0.922711	-0.701523	0.369988	0.632394	0.790014	1.56155e-39	6.65676e-24	3.06646e-07	2.21727e-20	3.76838e-26	3		LSD1_DROME	4e-05	Lipid storage droplets surface-binding protein 1 [Drosophila melanogaster]
SMED30030190	-3.77426	-6.0503	-1.93869	-2.20882	-1.882	1.24601e-146	8.84205e-217	1.29376e-54	2.44814e-65	5.00066e-38	1
SMED30030192	-1.06088	-1.27546	-2.73915	-2.59693	-3.7713	3.29717e-08	1.18751e-10	2.94983e-36	1.38629e-30	1.2011e-33	2
SMED30030198	0.346379	0.116685	0.0215614	-0.479752	-1.07513	4.38958e-06	0.198282	0.876079	2.82684e-10	4.31452e-34	2	Y	LBR_MOUSE	8e-63	Lamin-B receptor
SMED30030202	-0.246432	-0.416105	-0.588919	-0.309843	-0.712019	0.00013899	7.4434e-12	7.72788e-22	7.09881e-07	6.58904e-25	2		SHLB1_BOVIN	2e-16	Endophilin-B1
SMED30030204	-0.736311	-1.66249	-1.51259	-1.75959	-1.89076	2.22036e-09	6.79945e-35	3.04512e-32	1.05803e-37	1.86349e-30	1
SMED30030213	0.191476	-0.107577	-0.27455	-0.923448	-1.58607	0.25035	0.565105	0.0953973	1.81588e-10	2.16017e-18	2
SMED30030234	0.14296	-0.210142	-0.427761	-0.941249	-1.46666	0.121099	0.0112153	4.74004e-08	1.79795e-36	1.29322e-63	2		TBA2_PATVU	0	Tubulin alpha-2/alpha-4 chain [Patella vulgata]
SMED30030292	-1.0982	-1.10599	-1.71746	-1.67864	-1.79393	8.8257e-48	9.46671e-49	6.83852e-109	4.58041e-104	1.10447e-85	1	Y	CP1A1_MOUSE	1e-46	Cytochrome P450 1A1
SMED30030295	-0.128663	-0.600917	-0.885198	-1.73353	-3.30707	0.43563	1.06671e-06	6.92252e-13	9.59461e-43	4.21415e-82	2		TDX2_BRUMA	1e-85	Thioredoxin peroxidase 2
SMED30030302	1.05559	1.69852	-2.37597	-2.31168	0.133218	1.31642e-06	1.89754e-16	2.7503e-16	3.12613e-14	0.778364	2
SMED30030305	-0.217263	-0.498253	0.0177101	-0.0762665	-0.0687959	0.000976514	8.44403e-17	0.876765	0.345868	0.455992	3		CBPA2_MOUSE	8e-60	Carboxypeptidase A2
SMED30030323	-0.873651	-0.841709	-0.435385	-0.390409	-0.318125	3.13487e-46	6.36608e-43	4.27084e-12	5.99275e-10	1.12562e-05	3		PNPH_MOUSE	1e-92	Purine nucleoside phosphorylase
SMED30030329	-0.37016	-0.400826	-0.340362	-0.521864	-0.351298	2.10445e-08	2.52896e-10	3.08963e-07	2.72899e-16	2.83214e-06	2		SURF4_CAEEL	2e-66	Surfeit locus protein 4 homolog [Caenorhabditis elegans]
SMED30030350	-0.110708	-0.463037	-0.473314	-0.949372	-1.46245	0.531083	0.00039992	0.000502859	5.39241e-13	1.98682e-19	2
SMED30030364	-2.41113	-4.17747	-1.1362	-1.5014	-1.23102	5.61472e-89	2.57922e-196	5.33725e-23	1.76374e-38	1.58751e-20	1		KAPCB_BOVIN	1e-87	cAMP-dependent protein kinase catalytic subunit beta
SMED30030383	-0.359223	-0.57809	-0.219457	-0.408244	-0.262745	8.16844e-11	1.74878e-27	0.000129075	2.49845e-14	1.96111e-05	1		CIPKT_ORYSJ	8e-13	CBL-interacting protein kinase 29
SMED30030413	-3.88964	-4.62579	-2.15135	-3.11122	-3.2929	7.32812e-32	3.90287e-39	1.69286e-17	5.99954e-28	4.57724e-22	1
SMED30030422	-1.36797	-1.3318	-1.96366	-2.11169	-2.71715	5.19562e-32	8.02475e-30	5.85798e-60	2.12897e-64	7.53293e-66	1	Y
SMED30030431	-0.0496702	-0.313462	-0.301918	-0.516929	-0.472916	0.637723	1.0251e-05	4.40861e-05	9.76428e-14	2.05054e-09	2		RU17_DROME	1e-67	U1 small nuclear ribonucleoprotein 70 kDa
SMED30030435	-0.0658193	-0.210274	-0.269815	-0.448714	-0.630624	0.41622	0.000803735	1.44371e-05	1.28372e-13	3.4795e-19	2		SRSF4_MOUSE	3e-57	Serine/arginine-rich splicing factor 4
SMED30030459	-1.13537	-0.784898	-0.630348	-0.576176	-0.368576	3.85634e-17	1.71282e-09	6.25414e-07	8.91142e-06	0.015432	3
SMED30030491	-2.25847	-4.67207	-0.67465	-1.13655	-0.844183	1.21105e-61	8.60478e-184	1.13199e-06	2.14753e-17	4.63734e-08	1
SMED30030516	-0.185049	-0.24968	-0.340166	-0.658303	-0.699594	0.0138709	0.000367098	1.10635e-06	6.03034e-23	5.40268e-20	2		MYEF2_HUMAN	3e-29	Myelin expression factor 2
SMED30030518	-0.252187	-0.590635	-0.200014	-0.434379	-0.499894	4.38958e-06	8.53347e-31	0.000495918	7.79992e-17	1.37327e-17	1		GNL3_CAEEL	2e-77	Guanine nucleotide-binding protein-like 3 homolog
SMED30030539	-1.34062	-1.35197	-0.490475	-0.514498	-0.556826	3.35399e-81	7.84561e-86	4.6985e-14	1.38835e-15	1.82839e-14	1		CLN3_CANFA	5e-90	Battenin
SMED30030543	0.153976	-0.119316	-0.40145	-1.04574	-2.12017	0.445933	0.5692	0.0182331	1.69734e-11	8.77837e-28	2		H2AZ_PONAB	3e-68	Histone H2A.Z
SMED30030557	-2.22111	-3.31314	-0.719503	-1.15659	-1.07204	1.72189e-98	6.69635e-153	4.17465e-16	1.24798e-34	3.29262e-23	1		TMC5_HUMAN	0.0005	Transmembrane channel-like protein 5 [Homo sapiens]
SMED30030558	-0.73552	-0.840808	-0.446708	-0.493398	-0.252301	1.03898e-18	7.70872e-24	9.38287e-08	3.47926e-09	0.0131315	3
SMED30030622	-1.24724	-1.38818	-0.546863	-0.744112	-0.803198	6.83287e-39	3.78393e-48	3.58903e-09	4.68688e-16	1.57596e-14	1		MRP1_CHICK	2e-168	Multidrug resistance-associated protein 1
SMED30030642	-2.03876	-2.34888	-1.74942	-1.92468	-2.41943	4.6583e-79	1.79908e-98	7.27943e-62	3.08395e-71	3.20081e-71	1	Y	CP2U1_HUMAN	2e-46	Cytochrome P450 2U1 [Homo sapiens]
SMED30030662	-2.68868	-4.52235	-0.862597	-1.48867	-0.787238	4.66947e-66	4.17129e-137	4.39848e-10	1.26956e-28	2.3334e-07	1
SMED30030666	-1.55257	-1.78242	-0.284298	-0.12143	0.157557	1.53275e-116	5.18142e-143	5.27262e-05	0.139115	0.0664134	3		CHDH_RAT	0	Choline dehydrogenase, mitochondrial
SMED30030679	-1.94957	-1.78423	-0.759074	-0.959742	-0.925431	1.00504e-140	8.88347e-127	1.3676e-26	4.83704e-42	1.13328e-28	1	Y	ELOV7_MOUSE	7e-41	Elongation of very long chain fatty acids protein 7
SMED30030681	-0.158489	-0.339807	-0.587885	-0.94474	-1.51685	0.142514	0.000204486	4.30893e-11	1.23066e-27	6.28423e-51	2
SMED30030704	-2.01396	-3.13277	-2.50692	-1.96483	-2.38541	2.28201e-11	2.56739e-15	1.87705e-15	3.84328e-09	8.77075e-09	1
SMED30030743	-0.361493	-0.4682	-0.594466	-0.623756	-0.52771	6.21882e-06	1.63362e-09	2.68135e-14	1.12816e-15	4.74039e-09	2		PISD_CRIGR	2e-68	Phosphatidylserine decarboxylase proenzyme
SMED30030751	-0.655012	-0.88589	-2.05325	-2.38071	-2.62823	4.5152e-08	5.87204e-12	7.4074e-50	2.70953e-50	9.3441e-41	2	Y	FGFR1_DUGJA	1e-52	Fibroblast growth factor receptor 1
SMED30030761	-0.100896	-0.670547	-0.11454	-0.294052	-0.44515	0.39526	1.02442e-14	0.341311	0.00152503	1.12425e-05	3
SMED30030799	-2.58464	-4.95978	-0.950954	-1.58905	-1.24835	1.31062e-51	3.34847e-151	4.63662e-08	4.53446e-21	1.55733e-10	1
SMED30030818	-0.0174822	-0.208422	-0.275842	-0.505098	-0.615204	0.865558	0.000952453	1.02246e-05	4.85556e-17	9.0518e-19	2	Y	HNRPK_CHICK	8e-37	Heterogeneous nuclear ribonucleoprotein K
SMED30030820	-1.56743	-1.75068	-0.376788	-0.76323	-0.477413	1.12698e-60	4.28903e-74	6.62487e-05	4.16533e-17	6.16958e-06	1
SMED30030824	-0.297507	-0.468412	-0.166792	-0.265149	-0.138431	1.93842e-06	3.34243e-15	0.0166288	2.32919e-05	0.0785088	3		EPN4_HUMAN	3e-50	Clathrin interactor 1
SMED30030864	-2.26238	-5.52309	-0.892919	-1.39141	-0.661695	7.47803e-35	3.66924e-135	2.00836e-06	1.47107e-14	0.00225522	1		S47A1_DANRE	3e-92	Multidrug and toxin extrusion protein 1
SMED30030908	-0.310305	-0.417395	-0.371885	-0.476429	-0.682858	1.52431e-06	2.4284e-11	7.44272e-09	3.17812e-14	3.68118e-22	2		RL27_DANRE	5e-28	60S ribosomal protein L27 [Danio rerio]
SMED30030914	-0.103569	-0.280476	-0.34486	-0.528367	-0.820866	0.244712	9.6908e-05	1.77336e-06	2.98277e-14	2.16163e-25	2		RL40_DROME	9e-84	Ubiquitin-60S ribosomal protein L40
SMED30030917	-0.298862	-0.649783	-0.401399	-0.642119	-0.723663	0.000360388	4.47575e-17	9.30229e-07	2.11022e-16	2.73097e-16	1
SMED30030925	-0.590695	-0.614181	-0.489802	-0.528853	-0.371677	1.02273e-20	4.60733e-22	1.63665e-14	1.98005e-16	6.43602e-07	1
SMED30030946	0.318206	-0.13696	-0.0461887	-0.988935	-2.5229	0.0209626	0.394758	0.835232	1.36871e-15	2.51694e-57	2		MCM7_BOVIN	0	DNA replication licensing factor MCM7 [Bos taurus]
SMED30030948	0.239506	0.281148	-0.347196	-0.470233	-0.824028	0.00874072	0.000920763	0.000151593	7.69076e-08	3.88889e-16	2		THB_LITCT	2e-35	Thyroid hormone receptor beta
SMED30030952	-1.20389	-1.2015	-2.0915	-2.40936	-3.05064	5.37271e-12	8.83629e-12	1.92452e-27	5.76845e-30	2.99143e-28	2		LITAF_DANRE	1e-10	Lipopolysaccharide-induced tumor necrosis factor-alpha factor homolog
SMED30030958	-0.0569324	-0.397634	-0.48356	-0.87433	-1.02486	0.745557	0.000450806	5.06172e-05	1.18412e-14	1.62154e-14	2
SMED30030996	-2.34976	-3.09922	-2.81776	-3.1309	-3.3759	3.23627e-70	1.37506e-114	1.82808e-96	8.74137e-116	1.95494e-93	1
SMED30031049	-1.25506	-1.53402	-0.445317	-0.82312	-0.639243	3.44264e-33	7.15165e-47	3.0184e-05	2.15064e-15	8.75844e-08	1		MFSD8_XENLA	7e-69	Major facilitator superfamily domain-containing protein 8 [Xenopus laevis]
SMED30031061	-1.41584	-1.54809	-2.34559	-2.34389	-2.64745	2.24031e-45	1.46395e-50	1.86501e-104	4.0385e-96	6.80807e-82	1	Y	NUCB1_BOVIN	3e-34	Nucleobindin-1
SMED30031069	0.0459211	-0.296873	-0.954008	-1.21926	-2.99223	0.873113	0.153532	4.97683e-07	6.57453e-10	3.74261e-21	2
SMED30031080	0.133936	-0.140121	-0.115843	-0.533042	-0.685627	0.0887593	0.0651485	0.17516	1.80707e-15	1.13435e-18	2	Y	GRP33_ARTSA	5e-32	Glycine-rich protein GRP33 [Artemia salina]
SMED30031091	-2.09084	-2.37224	-1.27677	-1.57532	-1.03762	2.00805e-82	5.10995e-105	1.00594e-34	9.7421e-52	1.58428e-18	1		INHBE_RAT	1e-11	Inhibin beta E chain
SMED30031094	-1.14523	-4.19645	-1.09473	-1.27239	-0.944045	4.03858e-07	2.80239e-39	1.35477e-06	6.69899e-08	0.000786295	3
SMED30031095	0.262903	-0.0759123	-0.302459	-1.19994	-2.29096	0.307255	0.803142	0.27095	8.67367e-08	6.54937e-15	2
SMED30031112	-2.46858	-5.45619	-1.73977	-2.50108	-2.41647	1.21574e-84	3.22424e-179	4.62771e-51	4.9066e-82	2.00982e-56	1		CELA1_RAT	3e-26	Chymotrypsin-like elastase family member 1
SMED30031134	-1.72345	-4.48677	-0.74597	-1.28685	-0.856333	2.09981e-36	1.74162e-177	1.50216e-07	7.18929e-21	7.48662e-08	1		S13A3_HUMAN	1e-53	Solute carrier family 13 member 3
SMED30031186	0.029176	-0.300051	-0.223216	-0.678157	-1.01068	0.78835	8.10843e-06	0.00234704	2.44713e-24	1.51766e-37	2		CND3_HUMAN	3e-80	Condensin complex subunit 3
SMED30031235	0.117437	-0.383086	-0.649694	-1.77151	-3.42568	0.473464	0.00205535	7.26178e-08	2.40702e-52	3.96454e-118	2		TBA2_PATVU	0	Tubulin alpha-2/alpha-4 chain [Patella vulgata]
SMED30031264	-0.347581	-0.649509	-0.322627	-0.479341	-0.610567	0.000130003	1.4347e-14	0.000436456	2.09039e-08	6.36648e-10	3		ALKB4_MOUSE	2e-59	Alpha-ketoglutarate-dependent dioxygenase alkB homolog 4
SMED30031267	-2.66383	-3.81532	-2.49199	-3.16098	-3.99729	9.47021e-18	1.58329e-25	2.41307e-17	1.36733e-21	2.48245e-13	1
SMED30031273	-0.844555	-1.21008	-0.558314	-0.792734	-0.558277	1.15116e-31	1.80137e-60	6.47971e-15	3.2033e-28	1.3698e-11	1		YHJX_ECOLI	9e-14	Uncharacterized MFS-type transporter YhjX [Escherichia coli K-12]
SMED30031280	-1.22963	-1.38585	-0.538173	-0.811129	-0.780676	2.52388e-65	8.78774e-85	2.2894e-14	7.23984e-32	5.00189e-23	1		TM104_DROME	5e-101	Transmembrane protein 104 homolog [Drosophila melanogaster]
SMED30031294	-0.419819	1.18697	-2.45264	-3.18285	0.160626	0.123901	1.30315e-09	1.55384e-19	8.33248e-30	0.636826	2
SMED30031307	-0.574596	-0.993232	-1.70849	-2.32114	-2.31193	6.65452e-06	8.58012e-16	1.41778e-40	2.96011e-67	1.75349e-48	1	Y
SMED30031338	-0.181037	-0.370207	-0.257925	-0.431594	-0.492582	0.000430435	2.89343e-15	2.10075e-07	6.1217e-20	6.89183e-20	1		CHERP_HUMAN	1e-35	Calcium homeostasis endoplasmic reticulum protein
SMED30031380	0.131814	-0.0754968	-0.287911	-0.598566	-0.802507	0.062502	0.329919	6.57628e-06	2.92162e-23	1.00276e-30	2		POGZ_HUMAN	8e-28	Pogo transposable element with ZNF domain
SMED30031446	-0.660346	-0.545283	-0.254346	-0.0665971	-0.119632	4.06182e-27	4.06286e-19	7.72486e-05	0.422299	0.140233	3		NGEF_PONAB	1e-28	Ephexin-1
SMED30031447	-0.131037	-0.521591	-0.631294	-1.04195	-1.58495	0.437546	4.61155e-05	1.20543e-06	5.06753e-16	2.5146e-24	2	Y	1433B_BOVIN	2e-105	14-3-3 protein beta/alpha
SMED30031463	0.248111	0.044082	-0.221194	-0.560493	-1.07	0.000810752	0.666032	0.00439429	6.21343e-16	6.33898e-42	2		DDX4_BOVIN	7e-130	Probable ATP-dependent RNA helicase DDX4
SMED30031474	-1.91874	-2.12033	-0.745178	-0.87621	-0.157488	1.64769e-107	3.86272e-121	2.51268e-20	2.61635e-26	0.156344	1		YOW5_SCHPO	4e-68	Pseudouridine-metabolizing bifunctional protein C1861.05
SMED30031477	0.44919	0.321587	-0.348737	-1.01113	-2.49768	0.00052587	0.012223	0.0270042	4.70892e-12	3.42222e-29	2		ORC3_BOVIN	1e-37	Origin recognition complex subunit 3 [Bos taurus]
SMED30031507	0.126325	-0.149134	-0.400975	-1.00741	-1.72868	0.46702	0.359894	0.00570571	3.07194e-13	1.69834e-22	2	Y	ZN333_HUMAN	6e-22	Zinc finger protein 333 [Homo sapiens]
SMED30031515	-1.01831	-1.56669	-0.357773	-0.497135	-0.366653	1.72329e-35	8.66715e-81	4.05816e-05	1.89342e-09	0.000125432	3		PGPS1_CHICK	2e-84	CDP-diacylglycerol--glycerol-3-phosphate 3-phosphatidyltransferase, mitochondrial
SMED30031539	0.178055	-0.253748	-0.676344	-1.55216	-2.84856	0.329542	0.129193	8.95657e-06	9.98564e-24	1.88516e-42	2		ORC4_HUMAN	2e-64	Origin recognition complex subunit 4 [Homo sapiens]
SMED30031541	-1.21974	-2.21998	0.564212	0.455159	-0.21012	2.60025e-15	2.26419e-34	1.291e-05	0.00107618	0.293821	3
SMED30031552	-0.168756	-0.289518	-0.375455	-0.432038	-0.487719	0.00393342	4.442e-08	4.05163e-12	1.71989e-16	3.66506e-16	2		BIR7A_XENLA	1e-06	Baculoviral IAP repeat-containing protein 7-A
SMED30031568	-1.50887	-1.61247	-1.93114	-2.21715	-2.60612	5.04173e-69	2.59042e-77	1.68818e-106	4.74298e-130	1.33156e-115	1	Y	C13AA_CAEEL	1e-38	Putative cytochrome P450 CYP13A10 [Caenorhabditis elegans]
SMED30031584	-0.0442269	-0.191501	-0.294675	-0.50754	-0.793083	0.741481	0.0458944	0.00147489	6.60298e-09	3.32988e-15	2
SMED30031587	-0.377616	-0.475271	0.296183	0.332706	0.103394	6.27319e-16	5.0623e-25	1.72303e-10	2.52324e-13	0.0885292	3		GYS_DROME	0	Glycogen [starch] synthase
SMED30031622	-0.326462	-0.476812	-0.0058404	0.127141	0.0848836	1.32246e-08	3.45606e-17	0.959374	0.0526007	0.294539	3		F16P1_RABIT	5e-160	Fructose-1,6-bisphosphatase 1
SMED30031631	-0.400611	-0.681986	-0.234305	-0.391305	-0.322396	1.02227e-08	3.90447e-24	0.00211589	2.25824e-08	6.14869e-05	3		6PGD_HUMAN	0	6-phosphogluconate dehydrogenase, decarboxylating [Homo sapiens]
SMED30031703	-0.167235	-0.277655	-0.20669	-0.382222	-0.289042	0.000101983	5.27685e-12	1.15323e-06	1.55389e-21	3.79108e-10	2		AR8BA_DANRE	4e-101	ADP-ribosylation factor-like protein 8B-A [Danio rerio]
SMED30031742	0.0580929	0.161612	-0.678815	-0.608578	-0.746935	0.600872	0.0515563	1.37242e-17	1.15814e-14	1.30171e-15	2		GRIK2_RAT	1e-58	Glutamate receptor ionotropic, kainate 2
SMED30031745	-1.06045	-1.03925	-0.258073	-0.286094	-0.362304	1.34937e-88	3.98747e-86	1.48676e-06	6.13679e-08	1.69956e-09	3		FAAH1_PIG	5e-69	Fatty-acid amide hydrolase 1
SMED30031756	-1.49471	-1.90318	-0.15426	-0.293583	-0.836442	1.60099e-22	3.50487e-32	0.467473	0.0989235	2.74121e-06	3
SMED30031757	-0.522246	-0.781505	-0.658625	-0.69709	-0.677753	4.1247e-10	1.04892e-21	2.92557e-15	3.21283e-17	4.93906e-13	1		NUDT8_MOUSE	4e-25	Nucleoside diphosphate-linked moiety X motif 8, mitochondrial
SMED30031782	0.294855	0.133652	-0.198749	-0.727281	-2.0454	0.123063	0.559052	0.384886	7.53529e-05	2.72546e-19	2
SMED30031818	-0.317662	-0.481268	-0.197658	-0.255042	-0.202462	4.93195e-10	9.96131e-23	0.000220264	4.57255e-07	0.00059517	3		JIP3_DROPS	7e-26	JNK-interacting protein 3
SMED30031857	-1.30828	-1.893	-0.607207	-0.951692	-0.954888	2.04886e-10	1.6841e-19	0.00301373	9.37369e-07	1.31679e-05	3
SMED30031858	0.0522141	-0.0605739	-0.220116	-0.39897	-0.758334	0.67362	0.597856	0.0183682	2.3208e-06	1.34558e-15	2		SMC4_XENLA	8e-128	Structural maintenance of chromosomes protein 4
SMED30031862	-1.12605	-1.56478	-0.43254	-0.718527	-0.688079	3.075e-35	3.24662e-66	9.94037e-07	1.80428e-17	1.43575e-11	1	Y	RB27B_MOUSE	1e-57	Ras-related protein Rab-27B [Mus musculus]
SMED30031869	-0.805566	-0.738533	-0.915224	-0.774618	-0.941904	7.60702e-30	5.97474e-25	7.63418e-38	7.32529e-27	2.00264e-29	1
SMED30031888	-0.169319	-0.316821	-0.252192	-0.364636	-0.426195	0.000324023	3.76112e-13	2.98385e-08	9.11675e-17	6.57015e-18	2		LAR1B_HUMAN	9e-53	La-related protein 1B
SMED30031929	0.129434	-0.0714371	-0.543405	-0.697916	-0.990618	0.355508	0.636679	8.92702e-07	6.56506e-11	6.51485e-16	2	Y	YQ58_CAEEL	7e-14	Uncharacterized protein C16C10.8 [Caenorhabditis elegans]
SMED30031930	-1.58976	-2.29481	-0.125735	-0.592379	-0.325892	3.48945e-61	1.92859e-118	0.352131	1.61343e-09	0.00594292	3		RNOY_CRAGI	3e-28	Ribonuclease Oy
SMED30031935	0.827189	0.766373	0.228675	-0.480054	-2.18204	4.3913e-08	2.40242e-07	0.270921	0.00694071	4.03308e-23	2
SMED30031947	-0.589821	-0.606404	0.781873	0.845616	0.939457	2.15629e-18	9.24762e-20	6.98907e-33	8.4431e-39	4.45849e-40	3		ACBG2_XENLA	4e-176	Long-chain-fatty-acid--CoA ligase ACSBG2
SMED30031965	-3.90023	-3.61468	-3.6144	-4.55488	-4.15572	6.81719e-18	1.76687e-12	4.46827e-17	7.85724e-15	1.14144e-08	1
SMED30031985	-0.925835	-0.823058	-0.885384	-1.13669	0.00831829	1.28854e-11	9.59379e-10	1.39811e-10	8.43052e-17	0.973956	2		S47A1_DANRE	3e-60	Multidrug and toxin extrusion protein 1
SMED30031990	-0.232318	-0.608506	-1.90213	-2.17413	-2.8515	0.379008	0.00378572	1.15055e-21	8.19741e-28	1.68998e-32	2
SMED30031993	-1.33421	-1.51399	-0.820307	-0.969963	-0.819755	7.48289e-32	1.56611e-39	5.23315e-13	1.68131e-17	2.86433e-10	1
SMED30032006	-1.11057	-1.2663	-1.03515	-1.57743	-1.2386	9.20654e-18	2.67094e-22	4.13753e-16	4.15518e-31	3.11488e-16	1		CTR2_RAT	4e-148	Cationic amino acid transporter 2
SMED30032008	-2.73696	-4.1768	-1.11886	-1.64857	-1.36501	2.21187e-84	2.20507e-163	1.10276e-16	6.55336e-35	5.92536e-19	1		PDE4D_MOUSE	4e-169	cAMP-specific 3',5'-cyclic phosphodiesterase 4D
SMED30032019	-2.77557	-4.86821	-1.09517	-1.53615	-1.14847	2.12751e-79	3.18849e-148	3.51189e-16	9.82269e-29	2.08769e-13	1		MOEH_DROME	4e-176	Moesin/ezrin/radixin homolog 1
SMED30032042	-1.65501	-2.36492	-1.05838	-1.42389	-1.93657	3.22366e-48	1.67163e-92	1.96636e-20	3.40375e-36	1.47526e-47	1
SMED30032059	-0.673947	-1.37274	-0.544485	-0.469746	-0.772575	0.000145652	3.57041e-15	0.0022348	0.00593041	5.55087e-05	3
SMED30032112	-1.93464	-1.72186	-1.39135	-1.99614	-1.68653	4.25135e-35	6.51177e-32	4.35142e-23	8.27849e-39	3.8415e-20	1	Y	SRR_ARATH	2e-65	Serine racemase
SMED30032143	-0.723376	-0.907871	-0.210992	-0.145907	-0.290179	2.18861e-12	2.52292e-19	0.0726046	0.229577	0.0168466	3		MOT12_XENTR	5e-16	Monocarboxylate transporter 12
SMED30032153	-0.37172	-0.301071	-0.425989	-0.447451	-0.320548	3.1027e-11	9.4822e-08	3.20173e-14	9.32588e-16	6.02624e-07	2		VATB_DROME	0	V-type proton ATPase subunit B
SMED30032157	-0.644743	-0.692352	0.314373	0.56753	0.922766	4.30107e-21	1.61178e-24	1.09773e-05	2.1703e-17	1.1444e-37	3		UNC9_CAEEL	3e-53	Innexin unc-9
SMED30032169	-1.46605	-1.65575	-2.44038	-2.81151	-3.26394	5.18378e-45	6.59869e-56	2.23725e-109	4.11338e-134	2.19022e-118	1	Y	GATM_XENLA	3e-118	Glycine amidinotransferase, mitochondrial
SMED30032172	-1.17287	-1.81539	-0.623889	-0.888454	-0.812002	1.01989e-41	4.84302e-94	1.25946e-12	4.58406e-25	1.19353e-16	1		GNAI_LYMST	2e-144	Guanine nucleotide-binding protein G(i) subunit alpha
SMED30032196	-0.150266	-0.328409	-0.272721	-0.279928	-1.26061	0.207586	0.00117444	0.0105748	0.00768321	1.57926e-28	2
SMED30032237	-0.528732	-0.689426	-0.0302863	-0.065692	-0.687482	3.54034e-12	2.54584e-21	0.811319	0.509287	6.70126e-16	1		NLRC3_HUMAN	1e-05	Protein NLRC3
SMED30032249	-0.0981448	-0.324007	-0.292551	-0.500234	-0.778206	0.189712	4.73968e-08	2.68768e-06	3.78028e-17	1.13148e-29	2		E2AK4_HUMAN	1e-94	Eukaryotic translation initiation factor 2-alpha kinase 4
SMED30032258	0.137716	-0.141828	-0.279489	-0.791953	-1.3183	0.407646	0.384405	0.0616081	1.93607e-09	7.55617e-17	2
SMED30032293	1.45804	1.14223	-1.57991	-2.5115	-4.44665	4.00529e-08	1.75789e-05	1.18319e-08	7.56991e-20	7.28737e-33	2
SMED30032299	-3.35513	-5.19045	-1.77344	-2.5337	-2.28611	7.11075e-51	4.65821e-93	4.7376e-17	2.65147e-32	2.98589e-20	1		WHITE_DROME	4e-138	Protein white [Drosophila melanogaster]
SMED30032303	-0.397329	-0.774499	-0.175934	-0.289062	-0.0542831	8.25012e-07	3.60532e-24	0.0590146	0.000377934	0.666309	3
SMED30032348	-0.539234	-0.782639	-0.488935	-0.66789	-0.734689	4.48416e-07	7.80843e-14	5.04495e-06	2.39022e-10	1.36094e-09	3
SMED30032349	-1.46969	-1.57376	-0.469935	-0.775393	-0.463871	5.13244e-51	3.7195e-59	9.2258e-07	7.47927e-17	1.65199e-05	1		AB17C_DANRE	2e-56	Alpha/beta hydrolase domain-containing protein 17C [Danio rerio]
SMED30032357	-2.74415	-4.67124	0.911617	0.676109	0.313328	8.55883e-13	9.35669e-25	0.000125674	0.00364206	0.296963	3
SMED30032429	-0.900758	-0.89636	-0.747761	-0.643426	-0.929021	1.62456e-16	4.64454e-16	5.76073e-12	6.51174e-09	3.47924e-13	3		SUR1_YEAST	3e-17	Mannosyl phosphorylinositol ceramide synthase SUR1 [Saccharomyces cerevisiae S288c]
SMED30032432	-0.322986	-0.721702	-0.166269	-0.392196	-0.387349	1.93884e-09	1.11845e-43	0.00425531	5.454e-14	1.13699e-10	1		SFXN1_SHEEP	2e-114	Sideroflexin-1 [Ovis aries]
SMED30032436	-1.68195	-1.9369	-0.44364	-0.522648	-0.396828	8.51054e-136	4.49364e-171	1.38799e-12	5.56511e-17	3.65073e-08	1		APMAP_DANRE	2e-39	Adipocyte plasma membrane-associated protein [Danio rerio]
SMED30032456	-0.97926	-1.55378	-0.309288	-0.51248	-0.3922	3.44843e-30	3.11606e-73	0.0012488	7.51059e-09	0.000138789	3		ALDH2_MESAU	0	Aldehyde dehydrogenase, mitochondrial
SMED30032475	-1.92051	-2.04316	-0.632704	-0.844761	-0.488097	2.57516e-99	2.19065e-113	2.96385e-12	1.31928e-21	2.03921e-06	1		PANK2_ARATH	7e-14	Pantothenate kinase 2
SMED30032499	0.0707374	-0.260578	-0.425557	-0.814613	-0.588727	0.535213	0.00136877	3.3825e-07	5.69354e-26	1.85085e-10	2		REST_DANRE	0.0005	RE1-silencing transcription factor
SMED30032538	-0.410757	-0.417034	-0.624544	-0.917033	-0.835859	7.72953e-08	2.3797e-08	1.34139e-16	4.34507e-34	1.84533e-21	2	Y	S18B1_MOUSE	3e-25	MFS-type transporter SLC18B1
SMED30032563	0.186319	-0.099229	-0.360935	-1.08291	-2.21532	0.231062	0.563841	0.0100248	8.17571e-18	1.21138e-43	2		MCM5A_XENLA	0	DNA replication licensing factor mcm5-A
SMED30032586	-1.08939	-1.20635	-0.450482	-0.536865	-0.627597	4.9873e-29	4.44695e-36	1.09929e-06	3.19205e-09	3.76151e-09	3		RAB5C_MOUSE	8e-51	Ras-related protein Rab-5C [Mus musculus]
SMED30032600	0.0409487	-0.147163	-0.342297	-0.721973	-1.00261	0.744269	0.116358	5.51087e-05	1.73779e-18	1.32746e-24	2
SMED30032609	-2.51672	-5.36257	-0.851624	-1.40328	-1.04103	5.37436e-68	5.56715e-188	1.49786e-09	4.67138e-24	5.9634e-11	1		S46A3_CHICK	7e-23	Solute carrier family 46 member 3
SMED30032614	-0.489306	-0.807568	-0.199206	-0.305118	-0.373182	4.45984e-10	2.65831e-25	0.0241349	0.000169867	3.99212e-05	3		GALK1_HUMAN	2e-104	Galactokinase
SMED30032630	-0.744959	-0.900075	-0.510695	-0.547604	-0.893337	8.537e-24	3.6504e-34	3.87204e-12	6.92747e-14	5.32093e-25	1		Y8948_DICDI	8e-14	Putative methyltransferase DDB_G0268948 [Dictyostelium discoideum]
SMED30032645	0.117252	0.0452973	-0.215995	-0.470502	-0.886661	0.205727	0.676959	0.00942955	2.68562e-10	3.89874e-26	2	Y	CBX1_HUMAN	1e-47	Chromobox protein homolog 1
SMED30032672	-0.531949	-0.463329	-0.581844	-0.497475	-0.44919	1.35857e-30	8.37719e-24	3.2357e-36	7.64063e-27	1.56482e-17	1		AP3D1_MOUSE	0	AP-3 complex subunit delta-1
SMED30032688	0.0750462	0.254167	-0.445548	-1.02866	-2.84784	0.717429	0.102982	0.00344445	2.97875e-11	1.08335e-37	2		CDK1_CARAU	2e-123	Cyclin-dependent kinase 1
SMED30032747	-0.91016	-1.07319	-0.167972	-0.252438	-0.0184943	1.38772e-45	3.50888e-63	0.0268355	0.000237402	0.87692	3		BEST2_MOUSE	2e-43	Bestrophin-2
SMED30032787	-2.21221	-2.0157	-0.721067	-0.693432	-0.425744	5.07647e-31	3.08422e-23	3.82567e-05	0.000243892	0.0545738	3
SMED30032793	0.0821238	0.00713861	-0.36983	-0.242327	-0.680389	0.367853	0.950898	1.86975e-07	0.000849983	3.35136e-18	2
SMED30032816	-2.27648	-4.67438	-0.997135	-1.39442	-0.681589	3.64705e-34	3.53659e-81	1.83791e-09	2.5352e-17	0.000182217	1		S47A1_DANRE	1e-16	Multidrug and toxin extrusion protein 1
SMED30032823	-1.97279	-2.14815	-1.92118	-1.92915	-1.80938	1.36914e-108	1.27988e-127	4.13206e-103	5.45362e-104	1.06325e-68	1	Y	NETR_SAGLB	9e-86	Neurotrypsin
SMED30032837	-0.993624	-1.60832	-0.649529	-0.638424	-2.16666	5.81023e-16	2.22615e-36	1.15131e-07	1.50229e-07	2.1214e-44	1		TC1D1_MOUSE	2e-21	Tctex1 domain-containing protein 1 [Mus musculus]
SMED30032854	-0.619242	-0.751881	-0.350861	-0.481188	-1.20145	4.96359e-23	3.4436e-32	3.06186e-08	3.85914e-14	2.14142e-57	1		NAMPT_MOUSE	1e-167	Nicotinamide phosphoribosyltransferase
SMED30032881	-1.51961	-2.21056	-0.290198	-0.342599	-0.393434	3.08884e-103	2.28021e-186	2.08709e-05	2.85771e-07	2.02513e-07	3		CDKL3_MACFA	3e-20	Cyclin-dependent kinase-like 3 [Macaca fascicularis]
SMED30033075	0.0492356	-0.183472	-0.39194	-0.713546	-0.713608	0.627894	0.0125959	4.24634e-08	8.55719e-25	2.76329e-19	2		MMS19_DANRE	2e-14	MMS19 nucleotide excision repair protein homolog
SMED30033083	-1.86174	-2.9449	0.782056	0.907694	0.395395	3.8078e-16	2.95663e-31	6.0378e-05	1.08461e-06	0.0958707	3
SMED30033101	-0.397125	-0.595208	-0.266366	-0.432281	-0.345078	3.15292e-14	6.78127e-32	9.50017e-07	4.18293e-17	3.87954e-09	1		NMT2_HUMAN	4e-177	Glycylpeptide N-tetradecanoyltransferase 2
SMED30033121	-0.58862	-0.689367	-0.298842	-0.201336	-0.161908	3.10297e-20	2.43918e-27	5.86279e-06	0.00325386	0.0460678	3		TPTE2_HUMAN	1e-99	Phosphatidylinositol 3,4,5-trisphosphate 3-phosphatase TPTE2
SMED30033152	-0.824746	-1.06883	-0.312273	-0.503785	-0.255786	3.31461e-26	4.76114e-42	0.000141121	1.53813e-10	0.0067376	3		S2611_MOUSE	3e-111	Sodium-independent sulfate anion transporter
SMED30033158	-0.623833	-0.70597	-0.456001	-0.452206	-0.544762	4.52228e-24	1.15953e-30	3.42459e-13	4.35412e-13	1.16883e-14	1		FLOT1_DROME	2e-153	Flotillin-1 [Drosophila melanogaster]
SMED30033179	-0.935529	-1.13909	-0.536038	-0.763841	-0.563434	7.83886e-40	6.08017e-58	9.42523e-14	5.35421e-27	5.92294e-12	1	Y	EHD1_HUMAN	0	EH domain-containing protein 1
SMED30033189	-0.434389	-0.618346	-0.299281	-0.267168	-0.401407	1.46474e-14	2.29708e-28	2.63802e-07	4.48864e-06	5.13002e-10	3		KCC2D_BOVIN	0	Calcium/calmodulin-dependent protein kinase type II subunit delta
SMED30033191	0.0150309	-0.202512	-0.228709	-0.358781	-0.715387	0.903078	0.00758958	0.00344116	6.90716e-07	5.87676e-19	2		CRNL1_RAT	0	Crooked neck-like protein 1
SMED30033211	0.225482	-0.0516221	-0.381592	-0.607311	-0.766149	0.004238	0.620579	7.3776e-07	2.1912e-16	1.89658e-19	2		RT09_BOVIN	4e-69	28S ribosomal protein S9, mitochondrial
SMED30033224	-1.43114	-2.37514	-0.0874299	-0.196588	-0.0331591	2.91493e-53	1.4815e-118	0.496147	0.0537571	0.833357	3		FRRS1_HUMAN	1e-23	Ferric-chelate reductase 1
SMED30033243	0.0392566	0.000234713	-0.485366	-0.546295	-0.370849	0.581676	0.997702	5.15169e-23	4.22064e-29	4.57385e-11	2		RHG07_BOVIN	5e-65	Rho GTPase-activating protein 7
SMED30033302	0.110605	-0.272141	-0.10908	-0.738724	-1.33703	0.199682	0.000126398	0.227063	5.91927e-28	2.45568e-65	2		MEX3B_XENLA	6e-15	RNA-binding protein MEX3B
SMED30033346	-0.23419	-0.33153	-0.234193	-0.322965	-0.433488	1.14121e-05	9.03364e-11	1.38846e-05	4.56556e-10	9.56168e-14	2		OLA1_CHICK	0	Obg-like ATPase 1 [Gallus gallus]
SMED30033348	0.727934	0.550652	0.108607	-0.69642	-1.69572	2.06174e-09	2.57668e-06	0.588416	6.21464e-07	1.69619e-22	2
SMED30033358	-1.57738	-3.62021	-1.2681	-1.65367	-1.09557	1.06873e-20	3.32933e-73	5.38518e-14	2.81504e-22	1.90454e-08	1		KAPCB_PIG	1e-55	cAMP-dependent protein kinase catalytic subunit beta
SMED30033373	-1.95251	-2.10727	-0.515812	-0.631046	-0.874682	1.18891e-133	1.73701e-143	2.81521e-13	2.72401e-18	2.23277e-25	1		P_MOUSE	2e-152	P protein
SMED30033374	-1.28498	-1.51311	-0.392133	-0.523176	-0.0429532	2.09558e-44	2.09351e-58	2.67503e-05	1.01053e-08	0.785096	3
SMED30033380	-0.196506	-0.519711	-0.0700745	-0.180412	0.0979157	0.00238172	7.27959e-19	0.410821	0.00570725	0.237449	3		HEXB_MOUSE	4e-161	Beta-hexosaminidase subunit beta
SMED30033387	-2.49568	-3.75254	-0.896603	-1.20161	-0.713958	2.90094e-60	4.62689e-121	6.13859e-09	1.30959e-15	5.31193e-05	1
SMED30033422	-1.17124	-1.11401	-0.225107	-0.308172	-0.18726	1.22084e-24	6.60149e-23	0.0635218	0.00671925	0.194269	3		MRP4_HUMAN	1e-163	Multidrug resistance-associated protein 4
SMED30033425	-1.4342	-1.47904	-0.605101	-0.681782	-0.605574	1.60942e-26	7.51986e-29	2.9335e-06	7.90811e-08	8.8972e-05	3		NAT8B_HUMAN	9e-05	Putative N-acetyltransferase 8B
SMED30033439	-0.726812	-0.561267	-0.11893	0.175695	-0.0471034	1.05668e-30	1.60694e-19	0.125469	0.00873074	0.639936	3		CAC1S_CYPCA	0	Dihydropyridine-sensitive L-type skeletal muscle calcium channel subunit alpha-1 [Cyprinus carpio]
SMED30033443	-1.04051	-1.5551	0.147911	0.382662	0.136937	7.22822e-19	1.86917e-37	0.323489	0.000896493	0.406538	3
SMED30033456	-0.508003	-0.579162	-0.976387	-0.707276	-0.566648	0.000113489	8.82173e-06	5.4001e-14	7.26215e-08	0.000161889	2		YZG1_CAEEL	4e-09	Uncharacterized protein F13E6.1 [Caenorhabditis elegans]
SMED30033469	-0.497605	-0.923434	-0.244286	-0.339295	-0.427307	1.17308e-07	1.85928e-24	0.0195755	0.000387674	5.18574e-05	3		ESF2_CANGA	4e-18	Pre-rRNA-processing protein ESF2
SMED30033476	-1.06254	-1.5348	-0.740643	-1.00867	-0.88681	4.63853e-34	2.51699e-68	4.266e-17	3.35777e-31	4.88094e-19	1	Y	ZN395_XENLA	2e-07	Zinc finger protein 395 [Xenopus laevis]
SMED30033478	0.0881304	-0.259255	-0.257783	-0.686932	-0.800791	0.302698	7.82068e-05	0.000289527	2.45104e-26	2.50524e-25	2		DI3L1_MOUSE	0	DIS3-like exonuclease 1 [Mus musculus]
SMED30033511	-1.44362	-2.11177	0.397511	0.344754	0.108763	4.43076e-49	1.29333e-87	4.22605e-06	8.85076e-05	0.374904	3		AAKG3_HUMAN	4e-57	5'-AMP-activated protein kinase subunit gamma-3
SMED30033529	-1.21516	-0.767864	-0.723915	-0.634283	0.17265	2.34307e-39	3.68283e-17	4.43925e-15	7.36924e-12	0.14983	1		AOF_DANRE	2e-58	Amine oxidase [flavin-containing]
SMED30033538	0.135016	-0.0597629	-0.260566	-0.643438	-0.991896	0.117259	0.544955	0.000972309	1.44753e-18	5.39194e-30	2		TOP2A_CRIGR	0	DNA topoisomerase 2-alpha
SMED30033565	0.112993	-0.198668	-0.46767	-1.09041	-2.45509	0.608107	0.301076	0.00648825	2.08337e-11	6.06318e-32	2
SMED30033568	-1.28458	-1.52726	-0.675218	-0.842149	-0.793493	2.18248e-81	1.25981e-110	1.62321e-25	3.4721e-38	4.93304e-26	1		SGK3_RAT	3e-90	Serine/threonine-protein kinase Sgk3
SMED30033600	0.176595	-0.106019	-0.125808	-0.390937	-0.558038	0.0107098	0.156036	0.105458	5.25349e-10	4.02737e-15	2		MCM6_HUMAN	0	DNA replication licensing factor MCM6
SMED30033621	-1.20993	-1.43602	-1.70416	-2.07539	-2.36614	1.40185e-31	9.49825e-44	1.07603e-57	1.01745e-79	4.26827e-67	1		DCOR_MOUSE	4e-78	Ornithine decarboxylase
SMED30033648	-1.27856	-1.90085	-0.579498	-0.658236	-0.909942	2.99478e-18	1.4711e-35	5.26928e-05	2.13168e-06	3.39094e-08	3
SMED30033653	-3.60503	-3.78958	-1.04181	-1.45554	-1.9681	8.10729e-19	2.84809e-14	0.00064167	8.89076e-05	3.56991e-05	3
SMED30033663	0.486171	0.370387	-0.311997	-0.572438	-1.4613	7.85259e-07	0.000258728	0.0069208	1.54052e-07	2.55515e-29	2
SMED30033665	1.48545	1.48177	-1.07749	-1.18225	-2.9601	2.34557e-34	4.27805e-34	2.29456e-08	3.26387e-09	3.06309e-24	2
SMED30033683	0.0782139	-0.0374248	-0.348055	-0.725602	-2.03037	0.75967	0.883959	0.0836834	9.80398e-05	1.19861e-15	2		CDC45_HUMAN	5e-68	Cell division control protein 45 homolog
SMED30033685	-2.10724	-3.09626	-0.886772	-1.17672	-0.827617	1.15568e-56	5.57687e-109	3.24054e-11	3.63539e-19	5.08905e-08	1		SCND3_HUMAN	0.0003	SCAN domain-containing protein 3
SMED30033686	-0.883553	-1.09758	-0.571309	-0.531242	-0.475238	4.22395e-30	3.67869e-45	5.27878e-14	1.97884e-12	2.20457e-08	1	Y	TRAF3_MOUSE	6e-18	TNF receptor-associated factor 3
SMED30033710	-2.07388	-5.54357	-0.969327	-1.7532	-1.34613	1.06506e-56	7.83851e-205	1.20691e-14	1.15612e-43	4.70161e-21	1		S47A2_PONAB	1e-70	Multidrug and toxin extrusion protein 2
SMED30033716	-1.76709	-5.15997	-0.95358	-1.78338	-1.88346	1.60684e-29	3.50627e-177	3.39459e-09	8.33248e-30	1.12524e-24	1
SMED30033726	-0.295037	-0.389902	-0.292148	-0.22463	-0.425717	3.13226e-10	1.51449e-17	5.23445e-10	2.11613e-06	3.0292e-16	1		MDR1A_MOUSE	0	Multidrug resistance protein 1A
SMED30033755	-1.48387	-2.17842	-0.358922	-0.817563	-1.14449	1.86392e-57	1.8376e-110	9.00254e-05	6.52171e-21	4.70516e-29	1
SMED30033764	-1.20486	-1.48112	-0.601098	-0.840449	-0.746283	3.89199e-68	5.0114e-96	2.83238e-19	5.52235e-35	1.30845e-21	1		MRP1_MOUSE	0	Multidrug resistance-associated protein 1
SMED30033765	-0.50111	-0.711882	-0.281634	-0.391278	-0.751749	7.49892e-08	3.87181e-15	0.00459854	2.60392e-05	1.78961e-12	3
SMED30033774	-0.578188	-0.609736	-0.0969434	-0.26297	-0.0305281	4.12167e-22	1.03383e-24	0.228086	3.3363e-05	0.774653	3		CATA_BOVIN	0	Catalase [Bos taurus]
SMED30033856	-1.37767	-1.86553	-0.315084	-0.64342	-0.258332	5.83994e-42	2.091e-72	0.00511967	3.38507e-10	0.0468115	3		NAGAB_CHICK	7e-109	Alpha-N-acetylgalactosaminidase
SMED30033880	-0.733829	-0.97117	-0.243757	-0.382183	-0.50809	1.22546e-09	9.28941e-16	0.0756094	0.00216086	0.000374624	3		RFESD_MOUSE	4e-05	Rieske domain-containing protein [Mus musculus]
SMED30033890	-4.14641	-3.99109	-3.37491	-2.63508	-3.21591	1.87972e-15	4.30313e-14	1.41046e-13	1.84848e-09	2.16703e-06	3
SMED30033892	-2.57222	-4.32187	-2.79794	-3.19967	-3.01659	4.2075e-27	3.65956e-44	4.76174e-31	2.18664e-33	6.10643e-20	1
SMED30033905	-2.39749	-4.5523	-1.19062	-1.68642	-1.66621	1.27365e-55	3.37489e-121	1.6111e-17	7.80835e-32	1.22257e-23	1
SMED30033916	-4.34476	-5.85904	-1.9164	-2.10643	-2.00178	4.25545e-233	9.7786e-289	2.62797e-70	2.71622e-79	4.14572e-53	1	Y	OXDD_HUMAN	8e-64	D-aspartate oxidase
SMED30033930	-0.705904	-0.976231	0.0431682	-0.0183974	0.0446518	3.12878e-26	7.02734e-50	0.700854	0.873029	0.693275	3		CBS_HUMAN	0	Cystathionine beta-synthase
SMED30033947	-1.10287	-1.41816	-0.51676	-0.570887	-0.379584	1.12937e-47	5.76546e-74	1.61182e-11	1.01582e-13	2.1884e-05	3		WIBG_BOMMO	4e-14	Partner of Y14 and mago
SMED30033995	-1.37972	-2.33106	-0.804028	-0.958992	-0.882312	2.15723e-17	7.80176e-41	9.18411e-07	2.84279e-09	1.95174e-06	3
SMED30034004	-1.27059	-1.9553	-0.538764	-0.953811	-0.950289	4.07929e-46	1.23964e-100	1.48271e-09	3.8671e-28	7.89974e-22	1
SMED30034017	-1.28045	-2.71591	-0.351204	-0.739937	-0.277486	7.71284e-40	3.97659e-129	0.000363193	2.85113e-15	0.0153142	1		PAG15_HUMAN	2e-55	Group XV phospholipase A2
SMED30034068	0.00351006	0.0439365	-0.734406	-0.5382	-0.45359	0.986013	0.687523	1.99707e-21	6.59689e-12	3.15696e-07	2		CTP5C_RAT	2e-05	Contactin-associated protein like 5-3
SMED30034070	-1.51622	-1.16372	-0.914511	-0.444474	-0.814387	8.59842e-14	1.16366e-08	1.32351e-05	0.0548242	0.000645615	3
SMED30034078	1.00547	0.956311	-0.580513	-0.965582	-1.31019	2.32447e-35	7.54253e-33	7.84511e-08	3.79135e-18	4.80931e-24	2
SMED30034099	-0.986651	-0.95629	0.15769	0.148142	-1.46779	1.83877e-10	1.32731e-09	0.406794	0.436031	1.53839e-16	2
SMED30034119	-1.03959	-1.091	-0.430001	-0.578402	-0.594033	1.40325e-28	1.33549e-32	2.10303e-06	6.82051e-11	1.63273e-08	3		SPSB3_XENTR	5e-18	SPRY domain-containing SOCS box protein 3
SMED30034124	-2.47534	-4.11477	-1.46638	-1.62459	-0.96606	6.56177e-29	2.33027e-49	6.28879e-13	3.1905e-14	8.18724e-05	1		MORN4_MOUSE	5e-13	MORN repeat-containing protein 4 [Mus musculus]
SMED30034127	-1.97054	-3.1645	-1.11375	-1.65677	-1.39731	1.65901e-72	1.53173e-142	7.97849e-29	8.2847e-57	3.93524e-31	1		CMA1_CANFA	8e-21	Chymase
SMED30034139	-0.699221	-0.663222	-0.209551	-0.376341	0.00811754	4.27565e-22	1.60982e-20	0.0104982	3.43398e-07	0.956156	3		PTPRQ_HUMAN	4e-50	Phosphatidylinositol phosphatase PTPRQ
SMED30034152	-0.237138	-0.366869	-0.303939	-0.47371	-0.633128	0.000147674	5.45249e-10	8.01396e-07	9.02672e-16	1.24583e-21	2		RL11_DROME	8e-90	60S ribosomal protein L11 [Drosophila melanogaster]
SMED30034168	-0.786232	-1.17097	-0.215841	-0.193291	-0.185183	1.04776e-24	1.102e-53	0.0152747	0.027946	0.0630784	3		KAD3_BOVIN	4e-79	GTP:AMP phosphotransferase AK3, mitochondrial
SMED30034179	-4.04136	-6.38313	-2.30328	-3.20391	-3.2847	4.28591e-111	5.33185e-191	6.70593e-44	2.37202e-76	1.18727e-56	1		ACT_HYDVU	2e-20	Actin, non-muscle 6.2 [Hydra vulgaris]
SMED30034191	-0.225101	-0.438761	-0.144081	-0.218469	-0.236555	0.000418475	8.32545e-14	0.0418109	0.000538911	0.000771438	3		PP4C_XENLA	0	Serine/threonine-protein phosphatase 4 catalytic subunit
SMED30034193	-0.365768	-0.507784	-0.249658	-0.197476	-0.0523085	1.04735e-10	5.42102e-20	2.29422e-05	0.000964957	0.554105	3		PLD3_XENLA	8e-95	Phospholipase D3
SMED30034203	0.0815602	-0.194273	-0.448503	-0.735143	-1.03883	0.489797	0.042336	4.50421e-07	3.01126e-17	1.25274e-24	2		DI3L2_XENTR	1e-66	DIS3-like exonuclease 2 [Xenopus (Silurana) tropicalis]
SMED30034208	-0.553598	-0.715238	-0.661486	-0.934328	-1.20633	4.28137e-05	1.93113e-08	6.34737e-07	8.79077e-13	7.45514e-14	2		BEST1_HUMAN	4e-47	Bestrophin-1
SMED30034257	-0.34639	-0.8164	-1.57788	-2.04108	-2.51154	0.00079453	2.37635e-17	4.5615e-55	2.47549e-84	1.5882e-80	1	Y	TTPAL_HUMAN	3e-20	Alpha-tocopherol transfer protein-like [Homo sapiens]
SMED30034291	-1.61957	-2.95802	-0.530088	-1.00728	-0.524334	2.43119e-29	1.17047e-81	0.000467014	9.83306e-13	0.00167175	3		YHJX_ECOLI	1e-11	Uncharacterized MFS-type transporter YhjX [Escherichia coli K-12]
SMED30034299	-0.0125134	-0.403513	-0.203913	-0.555488	-0.682972	0.9026	8.69678e-13	0.00134441	1.02755e-22	3.68952e-26	2		RBM41_DANRE	4e-13	RNA-binding protein 4.1
SMED30034331	-1.14362	-2.01228	1.07312	1.17719	1.0366	2.11382e-29	2.37187e-75	1.6285e-33	2.08392e-40	3.13119e-26	3		CDD_MOUSE	3e-32	Cytidine deaminase
SMED30034335	0.292302	0.0512179	-0.051983	-0.349891	-0.693323	1.13809e-05	0.572739	0.613314	1.50465e-07	5.84908e-20	2		TDRD7_RAT	0.0001	Tudor domain-containing protein 7
SMED30034338	0.442499	0.15611	-0.19611	-1.19505	-2.37315	0.00636761	0.418928	0.364868	2.36899e-13	2.98649e-27	2
SMED30034376	-0.863078	-1.80381	-0.479895	-1.04026	-0.773045	6.82484e-16	6.40966e-62	1.89209e-05	1.47042e-22	4.12176e-10	1		SC6A5_MOUSE	2e-172	Sodium- and chloride-dependent glycine transporter 2
SMED30034385	-0.770831	-0.610374	0.233103	0.253152	0.571136	6.41686e-29	2.09305e-18	0.00182105	0.000536081	2.46636e-14	3		ELOV4_MACFA	1e-61	Elongation of very long chain fatty acids protein 4
SMED30034417	-1.49728	-2.8977	-0.139453	-0.233028	-0.688466	4.28386e-15	2.77822e-39	0.554738	0.227594	0.000677708	3
SMED30034418	-2.58465	-6.17528	-0.871548	-1.60615	-1.48688	3.9155e-51	5.21053e-121	9.99945e-09	3.00335e-25	3.29547e-16	1		RAC1_RAT	1e-53	Ras-related C3 botulinum toxin substrate 1
SMED30034421	-1.16443	-1.48219	-0.48311	-0.249839	-0.916069	3.41768e-11	1.00656e-16	0.00559255	0.187842	1.16579e-05	3		B3GN5_PIG	1e-37	Lactosylceramide 1,3-N-acetyl-beta-D-glucosaminyltransferase
SMED30034422	-0.0284018	-0.33697	-0.534042	-1.19858	-2.86991	0.931686	0.137906	0.0136448	1.72389e-09	4.13255e-29	2
SMED30034424	-0.53141	-0.58582	-0.308969	-0.363539	-0.202977	4.10498e-14	8.6964e-18	2.20399e-05	1.89983e-07	0.0162006	3		AGFG1_MOUSE	5e-40	Arf-GAP domain and FG repeat-containing protein 1
SMED30034478	-0.984099	-1.33291	0.00907852	0.0186026	-0.373901	2.24531e-14	9.42429e-24	0.972839	0.933105	0.0172215	3
SMED30034490	-0.248817	-0.679384	-1.93736	-2.18441	-2.49897	0.00437991	1.16265e-16	3.62469e-106	2.97786e-119	1.06432e-99	1	Y	FGFR1_DUGJA	5e-62	Fibroblast growth factor receptor 1
SMED30034506	-0.638826	-0.772276	-0.419131	-0.538048	-0.556303	4.4243e-24	9.0797e-36	5.63347e-11	4.77269e-18	1.15674e-14	1		ACE_MESAU	2e-130	Angiotensin-converting enzyme
SMED30034512	0.0643495	-0.112994	-0.0798913	-0.278797	-0.431705	0.327578	0.043623	0.219059	2.65691e-08	6.81781e-15	2		DX39B_HUMAN	0	Spliceosome RNA helicase DDX39B
SMED30034520	0.25487	0.102227	-0.904851	-1.44815	-3.20929	0.09126	0.572739	1.06589e-10	4.4666e-23	3.33352e-52	2	Y	RAD51_CRIGR	0	DNA repair protein RAD51 homolog 1 [Cricetulus griseus]
SMED30034555	-0.428193	-0.108343	-0.558136	-0.633421	-1.89579	2.48691e-05	0.380151	2.25496e-08	1.8747e-10	1.11986e-51	2		ACH1_DROME	3e-85	Acetylcholine receptor subunit alpha-like 1
SMED30034560	-0.935732	-1.46879	-0.28026	-0.478143	-0.359064	6.70799e-34	5.65629e-81	0.00101107	1.18957e-09	7.7466e-05	3		TRAF4_MOUSE	8e-28	TNF receptor-associated factor 4
SMED30034564	-0.375615	-0.426395	-0.165138	-0.262745	0.0210118	1.00264e-11	4.49334e-15	0.0074319	3.48895e-06	0.833134	3		ACOX3_HUMAN	0	Peroxisomal acyl-coenzyme A oxidase 3
SMED30034591	-0.283371	-0.649033	-0.143398	-0.370281	-0.118198	0.000214942	1.60694e-19	0.100535	3.96592e-07	0.238898	3		G137B_HUMAN	6e-19	Integral membrane protein GPR137B
SMED30034597	-4.3133	-8.07612	-3.00803	-3.88361	-3.69212	9.4393e-63	1.26046e-145	2.33954e-34	1.0094e-52	1.11678e-34	1		BGH3_RABIT	4e-24	Transforming growth factor-beta-induced protein ig-h3
SMED30034617	-0.0695226	-0.31214	-0.454364	-0.803162	-1.23883	0.647162	0.00388507	2.28223e-05	1.17524e-14	1.13142e-22	2
SMED30034619	-1.24296	-1.23136	-4.76328	-6.30051	-4.43159	1.05654e-08	3.2269e-08	7.98907e-45	4.26417e-45	1.10997e-21	2
SMED30034629	-0.548659	-0.556001	-0.328448	-0.336882	-0.105122	1.2604e-24	7.64663e-26	3.51358e-09	6.64996e-10	0.150201	3		GAPR1_MOUSE	3e-27	Golgi-associated plant pathogenesis-related protein 1
SMED30034644	-1.4688	-1.76235	-0.554005	-0.612999	-0.32238	2.76847e-40	1.48899e-51	5.56916e-08	4.29489e-09	0.0132452	3
SMED30034650	-2.3502	-3.1154	-1.99172	-2.18198	-1.76979	4.53135e-19	6.3191e-24	1.61487e-15	2.18776e-15	3.60657e-08	1
SMED30034659	-1.60706	-2.09638	-0.556618	-0.754018	-0.517361	1.82265e-53	6.36953e-84	8.64906e-08	1.40636e-13	1.24155e-05	3
SMED30034688	-1.44081	-1.99978	0.41028	0.469009	0.682168	3.35966e-09	1.82839e-14	0.08294	0.0372996	0.00539874	3
SMED30034695	-3.96384	-4.38665	-3.52911	-4.4077	-4.29134	2.98268e-42	5.22693e-52	7.81667e-41	4.1542e-52	3.35069e-34	1
SMED30034697	-0.138016	-0.34714	-0.233697	-0.486528	-0.750113	0.0930365	5.40544e-07	0.00191594	1.19691e-12	1.30065e-22	2		SET_HUMAN	1e-63	Protein SET
SMED30034713	-1.02051	-1.16612	-0.208711	-0.0982413	-0.0718476	3.32782e-56	7.52129e-72	0.00270411	0.217566	0.451058	3		CP3AE_CAVPO	4e-98	Cytochrome P450 3A14
SMED30034728	0.0195107	-0.314656	-0.40965	-0.749145	-1.09767	0.895888	0.000343701	5.20279e-06	2.61689e-18	9.93023e-28	2		SAE1_XENTR	2e-56	SUMO-activating enzyme subunit 1
SMED30034746	-0.316515	-0.132844	-1.7309	-2.09405	-2.58337	0.00136178	0.24842	6.1322e-65	5.7868e-80	8.9454e-76	2	Y	AZIN2_XENLA	1e-56	Antizyme inhibitor 2
SMED30034751	-0.241039	-0.400363	-0.155631	-0.206741	-0.214478	5.11449e-07	1.46459e-18	0.00260848	1.73413e-05	7.16959e-05	3		EFGM_ANOGA	0	Elongation factor G, mitochondrial
SMED30034814	-2.00365	-2.4437	0.093263	-0.145522	-0.281599	6.72604e-22	2.02242e-29	0.727435	0.537305	0.213717	3
SMED30034819	0.0982921	-0.221398	-1.07353	-1.38231	-1.83867	0.603116	0.150946	2.55938e-16	5.2256e-26	1.50292e-32	2
SMED30034820	-1.79044	-1.65596	-1.2739	-0.954629	-0.778672	1.19343e-25	6.38828e-23	3.46474e-15	2.49858e-09	3.21875e-05	1		TRFE_CHICK	6e-80	Ovotransferrin
SMED30034829	0.0641217	-0.12249	-0.483081	-0.74708	-1.22799	0.72573	0.429727	0.000159276	1.44076e-09	4.91591e-17	2		FACD2_MOUSE	1e-29	Fanconi anemia group D2 protein homolog
SMED30034881	-0.723698	-0.90779	-0.140774	-0.109144	-0.291375	4.52487e-13	2.03881e-19	0.253303	0.389222	0.0176722	3		KCMA1_CHICK	3e-100	Calcium-activated potassium channel subunit alpha-1
SMED30034887	-1.64576	-2.15746	-0.141764	-0.57236	-0.267841	7.37485e-27	1.37033e-43	0.481063	7.25899e-05	0.141015	3
SMED30034985	-5.3079	-8.29279	-1.19827	-2.02261	-1.66954	5.28024e-133	1.65968e-153	3.26626e-16	3.58161e-38	1.25161e-20	1		S5A3A_DANRE	7e-88	Solute carrier family 52, riboflavin transporter, member 3-A
SMED30035002	-0.558642	-0.434531	-0.00684148	-0.051834	0.0844494	8.71084e-18	2.17025e-11	0.958162	0.580999	0.371126	3		TMED7_HUMAN	4e-40	Transmembrane emp24 domain-containing protein 7
SMED30035063	0.334952	0.0475892	0.0527828	-0.588232	-0.937818	7.52793e-05	0.697078	0.698274	1.08305e-11	5.19994e-20	2		SOX14_DROME	1e-07	Putative transcription factor SOX-14 [Drosophila melanogaster]
SMED30035078	-0.897142	-1.30124	-0.895923	-0.989249	-0.780065	8.4007e-11	4.1871e-19	7.8253e-11	5.72997e-12	3.21228e-06	3		SUR1_YEAST	3e-18	Mannosyl phosphorylinositol ceramide synthase SUR1 [Saccharomyces cerevisiae S288c]
SMED30035138	-1.24179	-1.39154	0.27109	0.543312	0.379765	6.14864e-35	5.01454e-43	0.014325	2.67315e-08	0.000852269	3		ST1C4_HUMAN	1e-50	Sulfotransferase 1C4
SMED30035148	-1.0571	-1.50639	-1.81473	-2.105	-2.82289	1.03515e-19	6.67374e-37	1.18007e-51	1.65804e-64	4.28531e-72	1	Y
SMED30035157	-2.57272	-3.17394	-1.29145	-1.82318	-2.164	1.86888e-28	4.68789e-34	9.41725e-12	1.03057e-17	1.21275e-14	1		M17L2_DANRE	7e-27	Mpv17-like protein 2 [Danio rerio]
SMED30035193	-0.370436	-0.59823	-0.519282	-0.743642	-1.26722	1.63293e-08	3.15951e-21	1.18502e-15	7.56257e-32	2.3302e-68	1		HSP83_DROPS	0	Heat shock protein 83
SMED30035199	-0.826964	-0.984681	-0.25654	-0.505033	0.0661691	2.4727e-13	2.145e-20	0.0317128	1.12516e-06	0.709067	3
SMED30035215	-1.1727	-1.63926	-0.563238	-0.782412	-0.411056	8.95528e-31	2.60412e-58	1.41677e-07	3.74218e-14	0.0008732	1		CNFN_XENTR	0.001	Cornifelin homolog [Xenopus (Silurana) tropicalis]
SMED30035250	-1.40855	-1.89453	-1.77577	-2.16849	-2.72032	4.09459e-37	1.02177e-60	8.45439e-56	9.78564e-75	1.26496e-72	1	Y	LITAF_CHICK	1e-13	Lipopolysaccharide-induced tumor necrosis factor-alpha factor homolog
SMED30035254	-2.52858	-3.11223	-1.00985	-1.49852	-1.66678	1.31843e-104	2.35212e-136	2.12217e-21	1.79668e-42	8.72815e-39	1		Y736_HAEIN	4e-30	Uncharacterized sodium-dependent transporter HI_0736 [Haemophilus influenzae Rd KW20]
SMED30035267	-1.35446	-2.23723	-0.635743	-1.2767	-0.724907	3.0986e-39	5.98871e-98	1.88393e-09	2.11778e-35	8.25297e-10	1		ALKMO_RAT	7e-109	Alkylglycerol monooxygenase
SMED30035282	-0.153513	-0.477859	-0.435491	-0.657477	-1.01681	0.148123	5.60166e-08	1.49123e-06	1.11153e-13	7.87167e-24	2		RFC5_HUMAN	1e-128	Replication factor C subunit 5
SMED30035318	-1.2889	-1.4549	-0.758034	-0.512626	-0.263761	7.2865e-23	2.32193e-24	1.51531e-09	0.000165823	0.112188	3		GT2D2_MOUSE	6e-57	General transcription factor II-I repeat domain-containing protein 2
SMED30035333	-0.796761	-1.06116	-0.336448	-0.714234	-0.51644	6.66067e-13	1.55203e-20	0.00332595	1.88156e-10	6.95627e-05	3
SMED30035347	-0.489093	-0.7838	-0.813926	-1.02427	-1.24076	0.000842414	1.76732e-08	1.10263e-08	4.72209e-13	9.28154e-15	2		SURF2_TAKRU	3e-10	Surfeit locus protein 2
SMED30035348	-1.13605	-0.973982	-0.662914	-0.509826	-0.63801	1.74836e-27	6.91388e-20	3.17014e-10	2.9268e-06	2.38107e-07	3		ATX1_YEAST	1e-07	Metal homeostasis factor ATX1 [Saccharomyces cerevisiae S288c]
SMED30035351	-0.114258	-0.315667	-0.469498	-0.568723	-1.2692	0.526665	0.0247679	0.000798322	2.43979e-05	3.76442e-15	2		FABD_HUMAN	2e-81	Malonyl-CoA-acyl carrier protein transacylase, mitochondrial
SMED30035366	-2.90401	-5.96531	-1.22181	-1.40762	-0.674719	2.68995e-66	4.52928e-108	7.80713e-19	2.4188e-21	4.09641e-05	1		CMA1_CANFA	3e-21	Chymase
SMED30035373	-0.103625	-0.4092	-0.256698	-0.526748	-0.698292	0.154845	1.89378e-12	3.67906e-05	1.14468e-19	1.93935e-26	2		HDAC1_CHICK	0	Histone deacetylase 1
SMED30035421	-1.2503	-1.41059	-2.70196	-3.09153	-3.64941	2.72797e-08	1.73155e-08	1.00367e-23	1.2233e-21	1.88726e-18	2
SMED30035424	0.923068	0.926313	0.386021	-0.107023	-0.648173	4.36757e-45	4.15562e-46	4.69375e-08	0.230086	1.84556e-15	2	Y	NLK_CANFA	5e-135	Serine/threonine-protein kinase NLK
SMED30035434	-1.79697	-2.29917	-0.685814	-0.651818	-0.960588	3.45658e-43	1.10764e-55	3.97254e-08	7.36533e-07	8.5627e-10	3		CP2F3_CAPHI	3e-77	Cytochrome P450 2F3
SMED30035447	-0.481762	-0.627921	-0.340088	-0.316134	0.116144	3.03158e-15	3.53107e-25	6.20722e-08	4.67924e-07	0.156409	3		CP2CE_RABIT	2e-68	Cytochrome P450 2C14
SMED30035469	-0.898875	-0.521349	-0.896052	-0.716314	-0.64879	1.36772e-30	4.74206e-12	1.13974e-30	4.42482e-21	9.46691e-14	1		INHBB_CHICK	9e-13	Inhibin beta B chain
SMED30035490	-1.69706	-1.82873	-3.33447	-3.7963	-4.33147	8.06383e-31	4.64452e-34	1.91982e-89	7.03109e-99	1.26368e-79	1
SMED30035502	-1.26741	-1.35918	-0.649862	-0.675064	-0.60453	2.08128e-53	3.9222e-61	8.26061e-15	4.54623e-16	1.74908e-10	1		CP2B4_RABIT	3e-73	Cytochrome P450 2B4
SMED30035608	-0.0986131	-0.427043	-0.585216	-0.700201	-0.923177	0.450666	1.07799e-05	5.98684e-09	1.17526e-12	2.43116e-16	2
SMED30035609	-2.27505	-3.99877	-0.832858	-1.39735	-0.963097	1.45407e-57	1.77222e-152	1.11298e-08	4.1928e-23	3.74789e-09	1		CYSP2_HOMAM	2e-119	Digestive cysteine proteinase 2
SMED30035640	-2.25075	-2.43599	-0.869152	-0.966209	-0.849047	7.58345e-47	9.00814e-49	1.8381e-10	1.31249e-11	1.27484e-07	3		VPS21_YEAST	8e-41	Vacuolar protein sorting-associated protein 21
SMED30035643	-1.59143	-1.83599	-0.11415	-0.39885	-0.238292	8.07747e-53	2.3029e-66	0.400412	0.000100167	0.0617955	3		KYNU_MYXXD	3e-138	Kynureninase
SMED30035658	-4.01344	-4.93087	-1.81394	-2.16337	-1.89464	1.99537e-117	7.47936e-124	4.16398e-44	1.07804e-50	1.69251e-31	1
SMED30035683	-0.479395	-0.581905	-0.46324	-0.556201	-0.307669	1.29689e-17	8.126e-26	3.72523e-16	2.7469e-23	2.57269e-06	1		VPP1_PONAB	0	V-type proton ATPase 116 kDa subunit a isoform 1
SMED30035711	-5.4385	-5.68217	-2.14023	-3.22456	-3.46042	0	1.23717e-289	1.12871e-115	2.8746e-177	5.31466e-124	1		SBNO1_RAT	0	Protein strawberry notch homolog 1 [Rattus norvegicus]
SMED30035769	-1.2072	-1.48621	-0.594261	-0.668369	-0.542058	1.28666e-34	1.25022e-49	4.22484e-09	3.41158e-11	3.53564e-06	3		FHL3_HUMAN	1e-16	Four and a half LIM domains protein 3
SMED30035775	-2.28776	-3.17235	0.585316	1.15355	0.895559	2.71319e-12	2.60858e-14	0.00813019	1.58166e-08	0.000165634	3
SMED30035782	-0.638816	-1.26479	1.71764	1.71379	1.66624	4.77198e-10	6.89103e-38	2.31874e-86	5.52683e-91	1.77908e-76	3		TNKS_DROME	6e-14	Tankyrase
SMED30035783	-1.85798	-2.56023	-0.330412	-0.249722	-1.43205	3.4143e-17	7.88377e-24	0.158107	0.32704	1.34627e-08	3
SMED30035808	-1.66426	-2.41603	-0.629252	-0.961902	-0.608264	5.73846e-30	9.5188e-56	1.78507e-05	1.25824e-11	0.000242054	3		SHK2_SCHPO	6e-20	Serine/threonine-protein kinase shk2 [Schizosaccharomyces pombe 972h-]
SMED30035816	-0.17675	-0.333004	-0.25363	-0.398495	-0.604319	0.0160676	4.5581e-07	0.000302893	1.44076e-09	1.44477e-16	2		RS13_LUMRU	2e-76	40S ribosomal protein S13 [Lumbricus rubellus]
SMED30035828	-1.71676	-4.14075	-0.613396	-0.916609	-0.519568	2.10901e-34	2.94171e-108	1.03827e-05	4.85559e-11	0.00171402	3
SMED30035831	0.18526	0.0622519	-0.646155	-1.05228	-1.24103	0.194811	0.716502	1.78771e-07	2.26864e-17	2.83641e-17	2
SMED30035840	-3.5263	-5.01162	-1.92359	-2.54091	-2.62761	9.04494e-104	7.81021e-170	1.27345e-36	4.42076e-60	2.76927e-46	1		CNFN_XENTR	3e-06	Cornifelin homolog [Xenopus (Silurana) tropicalis]
SMED30035855	-0.00283208	-0.238876	-0.252762	-0.507451	-0.976482	0.991603	0.0108007	0.0098854	9.65061e-09	2.89931e-21	2		PARP2_MOUSE	5e-155	Poly [ADP-ribose] polymerase 2
SMED30035864	1.19575	0.899166	-1.08948	-1.53386	-1.51711	1.79622e-25	5.45346e-14	5.93742e-14	4.03769e-23	4.25998e-16	2		MPIP_DROME	3e-29	M-phase inducer phosphatase
SMED30035880	-0.0112198	-0.159957	-0.204501	-0.346464	-0.632914	0.925523	0.0410167	0.00844133	1.66186e-06	4.10507e-14	2		MBD3_MOUSE	4e-38	Methyl-CpG-binding domain protein 3
SMED30035887	-0.519787	-0.49172	-0.26246	-0.281961	-0.216646	9.42863e-14	9.23426e-13	0.000337289	8.16401e-05	0.0102693	3		TRAF6_CERAT	3e-05	TNF receptor-associated factor 6
SMED30035904	0.283611	-0.26407	-2.94434	-4.27025	-5.4839	0.319196	0.345996	6.5031e-39	2.71427e-71	2.28452e-70	2
SMED30035939	-0.496425	-0.24637	-0.181989	-0.106887	-0.106748	1.42769e-16	6.99489e-05	0.00633969	0.141696	0.191913	3		ACTN3_BOVIN	0	Alpha-actinin-3
SMED30035945	-0.452456	-0.845761	-0.523404	-0.573655	-0.965337	0.000265922	3.22352e-14	1.69438e-05	2.32201e-07	4.27256e-12	3		ANR52_DANRE	4e-21	Serine/threonine-protein phosphatase 6 regulatory ankyrin repeat subunit C
SMED30035947	-2.02885	-2.84257	-0.504736	-0.932698	-0.929042	5.18345e-56	2.34917e-91	6.14718e-05	2.69881e-14	4.21483e-11	1		RAB9B_PONAB	2e-49	Ras-related protein Rab-9B [Pongo abelii]
SMED30035969	0.100582	-0.179724	-0.397873	-0.566378	-1.11698	0.591016	0.258227	0.00537246	1.81601e-05	3.99845e-14	2		PYR1_SQUAC	0	CAD protein
SMED30036006	-1.56387	-1.43301	-0.609315	-0.870895	-0.423053	7.69195e-42	2.95639e-40	2.60896e-09	6.15711e-18	0.000431446	1		GCNT1_MOUSE	8e-54	Beta-1,3-galactosyl-O-glycosyl-glycoprotein beta-1,6-N-acetylglucosaminyltransferase
SMED30036011	-3.1518	-3.38393	-2.99607	-2.69634	-1.98187	1.42458e-15	1.33543e-11	3.29335e-15	3.99598e-09	0.000174748	1
SMED30036024	0.29843	0.121645	-0.568741	-1.15058	-2.22214	0.0738867	0.541264	0.000500497	1.3086e-12	3.06811e-25	2		PRI2_MOUSE	7e-117	DNA primase large subunit

## Sheet: 587_common_BLAST
Gene ID	chd4_d12	chd4_d15	p53_d12	p53_d15	p53_18	C. elegans ID	Ce.evalue	Ce.description	D.melanogaster ID	Dm.evalue	Dm description	H.sapiens ID	Hs.evalue	Hs.description	M.musculus ID	Mm.evalue	Mm.description	Sprot ID	sp.evalue	sp.description
SMED30016119	-0.606043	-0.770044	-0.598484	-0.534262	-0.261327	NA	NA	NA	NA	NA	NA	NA	NA	NA	NA	NA	NA	NA	NA	NA
SMED30015218	-0.651193	-0.863999	-0.714254	-0.960695	-1.01735	K02D7.4	5e-06	DSC-4 (dsc-4)	FBpp0080968	1e-09	Microsomal triacylglycerol transfer protein	ENSP00000427679	3e-09	microsomal triglyceride transfer protein	ENSMUSP00000029805	2e-09	microsomal triglyceride transfer protein	MTP_PIG	2e-10	Microsomal triglyceride transfer protein large subunit
SMED30000684	-0.680971	-0.913136	-0.663777	-0.86928	-0.641112	NA	NA	NA	NA	NA	NA	NA	NA	NA	NA	NA	NA	NA	NA	NA
SMED30003053	-1.49696	-1.74948	0.550448	0.102449	-0.54746	Y50D7A.3a	5e-27	Y50D7A.3, isoform a.	FBpp0075176	9e-54	NA	ENSP00000443510	1e-57	1-acylglycerol-3-phosphate O-acyltransferase 3	ENSMUSP00000132954	6e-56	1-acylglycerol-3-phosphate O-acyltransferase 3	PLCC_HUMAN	6e-57	1-acyl-sn-glycerol-3-phosphate acyltransferase gamma
SMED30018561	-1.48212	-1.65573	0.877244	0.705018	-0.663169	C10G11.5c.2	2e-11	PNK-1, isoform a.	NA	NA	NA	ENSP00000478189	4e-11	pantothenate kinase 4	ENSMUSP00000125663	2e-07	pantothenate kinase 4	PANK2_ARATH	7e-11	Pantothenate kinase 2
SMED30024190	-0.974668	-1.7571	-0.105594	-0.899227	-0.585456	F55A8.2b.2	0	EGL-4, isoform c.	FBpp0077706	0	cGMP-dependent protein kinase 21D	ENSP00000363092	0	protein kinase, cGMP-dependent, type I	ENSMUSP00000073268	0	protein kinase, cGMP-dependent, type I	EGL4_CAEBR	0	cGMP-dependent protein kinase egl-4
SMED30036006	-1.3244	-1.21372	-0.223415	-0.60628	-0.101963	F22D6.12.3	1e-35	GLY-19 (gly-19)	FBpp0072782	2e-21	peptide O-xylosyltransferase	ENSP00000415454	2e-52	glucosaminyl (N-acetyl) transferase 1, core 2	ENSMUSP00000127835	1e-54	glucosaminyl (N-acetyl) transferase 1, core 2	GCNT1_MOUSE	8e-54	Beta-1,3-galactosyl-O-glycosyl-glycoprotein beta-1,6-N-acetylglucosaminyltransferase
SMED30030034	0.46797	-0.30534	-0.681751	-1.0448	-1.17008	H14A12.2b.5	5e-06	FUM-1, isoform a.	FBpp0099918	6e-151	NA	ENSP00000378741	0	argininosuccinate lyase	ENSMUSP00000124579	0	argininosuccinate lyase	ARLY_MOUSE	0	Argininosuccinate lyase
SMED30002705	0.0632109	-0.414976	-1.02212	-1.03662	-1.62131	NA	NA	NA	NA	NA	NA	NA	NA	NA	NA	NA	NA	NA	NA	NA
SMED30021962	-0.161803	-1.07202	-0.572446	-1.24589	-1.38573	R74.6	4e-116	R74.6 (R74.6)	FBpp0079444	2e-157	pelota	ENSP00000274311	2e-163	pelota homolog (Drosophila)	ENSMUSP00000104849	1e-161	pelota homolog (Drosophila)	PELO_PONAB	4e-163	Protein pelota homolog [Pongo abelii]
SMED30005429	0.363047	0.0903767	-1.04724	-1.29031	-1.34261	NA	NA	NA	NA	NA	NA	NA	NA	NA	NA	NA	NA	NA	NA	NA
SMED30032816	-1.19069	-1.94671	0.155677	-0.246974	1.08142	NA	NA	NA	NA	NA	NA	ENSP00000338084	1e-12	solute carrier family 47 (multidrug and toxin extrusion), member 2	ENSMUSP00000090710	2e-16	solute carrier family 47, member 2	S47A1_DANRE	1e-16	Multidrug and toxin extrusion protein 1
SMED30032854	-0.737632	-1.26169	-0.20324	-0.822649	-1.66206	NA	NA	NA	NA	NA	NA	ENSP00000222553	1e-167	nicotinamide phosphoribosyltransferase	ENSMUSP00000020886	1e-168	nicotinamide phosphoribosyltransferase	NAMPT_MOUSE	1e-167	Nicotinamide phosphoribosyltransferase
SMED30023294	-0.478572	-0.580217	-0.69225	-0.719825	-1.06751	F52F12.1a	3e-28	OCT-1, isoform b (oct-1)	FBpp0112387	7e-32	NA	ENSP00000275300	4e-36	solute carrier family 22 (organic cation transporter), member 3	ENSMUSP00000024595	2e-37	solute carrier family 22 (organic cation transporter), member 3	S22A3_MOUSE	2e-36	Solute carrier family 22 member 3
SMED30020433	-0.929255	-1.54615	-0.386675	-0.814393	-0.52238	F10G7.5a	4e-11	F10G7.5, isoform a (F10G7.5)	NA	NA	NA	NA	NA	NA	NA	NA	NA	OXLT_OXAFO	2e-07	Oxalate:formate antiporter
SMED30021123	-1.30893	-1.65752	0.118886	-0.473135	-0.24529	NA	NA	NA	NA	NA	NA	NA	NA	NA	NA	NA	NA	Y1207_METJA	8e-09	Uncharacterized N-acetyltransferase MJ1207 [Methanocaldococcus jannaschii DSM 2661]
SMED30033686	-1.18371	-1.78403	-0.2882	-0.364814	0.115988	F45G2.6	4e-06	TRF-1 (trf-1)	FBpp0071136	2e-05	TNF-receptor-associated factor 6	ENSP00000328003	3e-18	TNF receptor-associated factor 3	ENSMUSP00000058361	3e-19	TNF receptor-associated factor 3	TRAF3_MOUSE	6e-18	TNF receptor-associated factor 3
SMED30030557	-1.28077	-1.7844	0.347027	-0.538403	-0.42252	NA	NA	NA	NA	NA	NA	ENSP00000456148	6e-06	transmembrane channel-like 5	ENSMUSP00000049784	0.0004	transmembrane channel-like gene family 5	TMC5_HUMAN	0.0005	Transmembrane channel-like protein 5 [Homo sapiens]
SMED30027942	-0.687345	-0.952642	-0.699462	-0.899842	-0.876595	NA	NA	NA	NA	NA	NA	NA	NA	NA	NA	NA	NA	NA	NA	NA
SMED30000827	-0.41583	-1.03157	-0.654811	-1.06807	-1.3968	NA	NA	NA	NA	NA	NA	NA	NA	NA	NA	NA	NA	NA	NA	NA
SMED30023805	-0.618897	-1.62951	0.62332	-0.759859	-1.56128	C14B9.2	4e-112	C14B9.2 (C14B9.2)	FBpp0087164	6e-53	ERp60	ENSP00000286091	3e-127	protein disulfide isomerase family A, member 4	ENSMUSP00000076521	4e-129	protein disulfide isomerase associated 4	PDIA4_RAT	2e-128	Protein disulfide-isomerase A4
SMED30032436	-1.41019	-1.65827	0.12558	-0.196632	-0.0162917	F57C2.5a.2	3e-25	F57C2.5 (F57C2.5)	FBpp0084534	3e-28	Hemomucin	ENSP00000217456	5e-40	adipocyte plasma membrane associated protein	ENSMUSP00000040840	4e-37	adipocyte plasma membrane associated protein	APMAP_DANRE	2e-39	Adipocyte plasma membrane-associated protein [Danio rerio]
SMED30028039	-1.3018	-1.58481	-0.247419	-0.698198	-0.119063	Y54E5B.1a	4e-12	SMP-1, isoform a.	FBpp0302962	7e-11	Sema-1a	ENSP00000357267	1e-10	sema domain, immunoglobulin domain (Ig), transmembrane domain (TM) and short cytoplasmic domain, (semaphorin) 4A	ENSMUSP00000103155	2e-10	sema domain, immunoglobulin domain (Ig), transmembrane domain (TM) and short cytoplasmic domain, (semaphorin) 4A	SEM1A_CAEEL	5e-11	Semaphorin-1A
SMED30026906	-0.515881	-0.853535	-0.714734	-0.763878	-0.717581	NA	NA	NA	NA	NA	NA	NA	NA	NA	NA	NA	NA	NA	NA	NA
SMED30021237	-1.1637	-1.42643	-0.132436	-0.752684	-0.840762	F20D6.4a	4e-46	SRP-7, isoform c.	FBpp0085524	4e-57	Serpin 42Da	ENSP00000283752	2e-62	serpin peptidase inhibitor, clade B (ovalbumin), member 3	ENSMUSP00000074958	2e-59	serine (or cysteine) peptidase inhibitor, clade B, member 9f	SPB10_CHICK	2e-62	Heterochromatin-associated protein MENT
SMED30032008	-1.41088	-1.92693	0.370526	-0.302496	0.264541	R153.1c	1e-152	PDE-4, isoform b.	FBpp0305506	2e-168	dunce	ENSP00000425605	5e-170	phosphodiesterase 4D, cAMP-specific	ENSMUSP00000073742	4e-171	phosphodiesterase 4D, cAMP specific	PDE4D_MOUSE	4e-169	cAMP-specific 3',5'-cyclic phosphodiesterase 4D
SMED30021535	-1.09821	-1.36458	-0.234879	-0.81231	-0.70823	NA	NA	NA	FBpp0085111	0.0003	Copper transporter 1C	ENSP00000363329	0.0001	solute carrier family 31 (copper transporter), member 1	ENSMUSP00000081574	6e-05	solute carrier family 31, member 1	COPT1_RAT	0.0003	High affinity copper uptake protein 1
SMED30035366	-1.29257	-1.71596	-0.250675	-0.672049	0.0186228	ZK546.15	1e-11	TRY-1 (try-1)	FBpp0077068	2e-16	NA	ENSP00000250378	2e-19	chymase 1, mast cell	ENSMUSP00000034368	2e-18	chymotrypsin-like	CMA1_CANFA	3e-21	Chymase
SMED30016254	-1.20397	-1.69182	0.691417	-0.279988	-0.307323	NA	NA	NA	NA	NA	NA	ENSP00000445481	6e-23	chromosome 12 open reading frame 66	ENSMUSP00000117249	2e-20	cDNA sequence BC048403	CL066_HUMAN	1e-22	UPF0536 protein C12orf66 [Homo sapiens]
SMED30002138	-1.01486	-1.40675	-0.386631	-1.09347	-0.640856	T27A1.5a.2	5e-63	T27A1.5, isoform a.	FBpp0292522	3e-78	NA	ENSP00000317382	1e-57	solute carrier family 36 (proton/amino acid symporter), member 4	ENSMUSP00000057355	7e-58	solute carrier family 36 (proton/amino acid symporter), member 4	S36A4_XENLA	2e-63	Proton-coupled amino acid transporter 4
SMED30004453	0.204879	-0.230228	1.10408	0.545438	2.22751	NA	NA	NA	NA	NA	NA	NA	NA	NA	NA	NA	NA	NA	NA	NA
SMED30027349	-0.804907	-0.981279	-0.682051	-1.22884	-1.1194	NA	NA	NA	FBpp0085076	7e-14	Saposin-related	ENSP00000317445	2e-09	prosaposin-like 1 (gene/pseudogene)	ENSMUSP00000100594	2e-07	prosaposin-like 1	SAP_CHICK	1e-09	Proactivator polypeptide
SMED30003020	0.256664	-1.00251	-0.360904	-1.65034	-1.06481	Y105E8A.8	1e-07	Y105E8A.8 (Y105E8A.8)	FBpp0305599	3e-44	WD repeat domain 79 homolog	ENSP00000379727	7e-77	WD repeat containing, antisense to TP53	ENSMUSP00000047825	2e-82	WD repeat containing, antisense to Trp53	WAP53_MESAU	6e-82	Telomerase Cajal body protein 1
SMED30010160	-1.25391	-1.13276	1.21558	1.13069	-1.36493	NA	NA	NA	NA	NA	NA	NA	NA	NA	NA	NA	NA	NA	NA	NA
SMED30034820	-1.06934	-1.04649	-0.624822	-0.417072	-0.312107	NA	NA	NA	FBpp0075698	1e-91	Transferrin 2	ENSP00000385834	1e-75	transferrin	ENSMUSP00000035158	3e-75	transferrin	TRFE_CHICK	6e-80	Ovotransferrin
SMED30026836	-1.24076	-1.4401	-0.0845967	-0.836292	-0.345153	R11A5.1b	0	APB-3, isoform a (apb-3)	FBpp0304569	0	ruby	ENSP00000440984	0	adaptor-related protein complex 3, beta 2 subunit	ENSMUSP00000080739	0	adaptor-related protein complex 3, beta 2 subunit	AP3B2_HUMAN	0	AP-3 complex subunit beta-2
SMED30008823	-0.745382	-1.24124	-0.012821	-0.848386	-1.54747	F01F1.9	4e-112	DNPP-1 (dnpp-1)	NA	NA	NA	ENSP00000273075	4e-143	aspartyl aminopeptidase	ENSMUSP00000070821	1e-137	aspartyl aminopeptidase	DNPEP_HUMAN	2e-142	Aspartyl aminopeptidase [Homo sapiens]
SMED30007621	-1.23574	-1.58333	-0.340809	-0.690857	-0.421126	NA	NA	NA	NA	NA	NA	NA	NA	NA	NA	NA	NA	NA	NA	NA
SMED30030518	0.722285	-0.820404	1.35035	0.903572	1.57201	K01C8.9	1e-78	NST-1 (nst-1)	FBpp0082867	4e-73	Nucleostemin ortholog (H. sapiens) 1	ENSP00000354091	4e-58	guanine nucleotide binding protein-like 3 (nucleolar)-like	ENSMUSP00000026297	3e-57	guanine nucleotide binding protein-like 3 (nucleolar)-like	GNL3_CAEEL	2e-77	Guanine nucleotide-binding protein-like 3 homolog
SMED30005872	-0.721392	-0.861446	-0.721055	-0.846767	-0.837781	C07G1.1	1e-53	SVH-1 (svh-1)	FBpp0076252	6e-98	Tequila	ENSP00000296498	6e-89	protease, serine, 12 (neurotrypsin, motopsin)	ENSMUSP00000029603	3e-89	protease, serine 12 neurotrypsin (motopsin)	NETR_SAGLB	2e-89	Neurotrypsin
SMED30008798	-1.19832	-1.57846	-0.312001	-0.633123	-0.419771	R07E4.6b	5e-44	KIN-2, isoform a (kin-2)	FBpp0087524	1e-80	cAMP-dependent protein kinase R2	ENSP00000265717	4e-63	protein kinase, cAMP-dependent, regulatory, type II, beta	ENSMUSP00000035220	3e-64	protein kinase, cAMP dependent regulatory, type II alpha	KAPR2_DROME	8e-80	cAMP-dependent protein kinase type II regulatory subunit [Drosophila melanogaster]
SMED30023307	-0.799932	-1.3734	-0.516908	-0.841298	-0.683541	NA	NA	NA	FBpp0071136	4e-05	TNF-receptor-associated factor 6	ENSP00000445998	5e-12	TNF receptor-associated factor 3	ENSMUSP00000028311	2e-11	TNF receptor-associated factor 2	TRAF5_MOUSE	1e-11	TNF receptor-associated factor 5 [Mus musculus]
SMED30027797	-1.07499	-1.48799	-0.15591	-0.769564	-0.841121	F10G7.5a	6e-50	F10G7.5, isoform a (F10G7.5)	FBpp0291719	5e-05	karmoisin	NA	NA	NA	NA	NA	NA	NA	NA	NA
SMED30002340	-1.18332	-1.71777	-0.122996	-0.707861	-0.396158	NA	NA	NA	NA	NA	NA	ENSP00000391848	7e-44	solute carrier family 47 (multidrug and toxin extrusion), member 2	ENSMUSP00000010267	3e-44	solute carrier family 47, member 1	S47A1_DANRE	1e-43	Multidrug and toxin extrusion protein 1
SMED30023489	-0.46018	-1.06881	-0.504962	-1.06029	-1.60105	Y67D2.3	2e-14	Y67D2.3 (Y67D2.3)	FBpp0085468	3e-10	NA	ENSP00000483781	5e-14	CDGSH iron sulfur domain 3	ENSMUSP00000103211	9e-15	CDGSH iron sulfur domain 3	CISD3_MOUSE	9e-14	CDGSH iron-sulfur domain-containing protein 3, mitochondrial
SMED30029180	0.433408	-0.952658	-0.688428	-1.41697	-1.32531	Y32F6A.3.2	2e-98	PAP-1 (pap-1)	FBpp0110309	3e-115	hiiragi	ENSP00000238714	8e-106	poly(A) polymerase gamma	ENSMUSP00000020513	1e-105	poly(A) polymerase gamma	PAPOG_HUMAN	4e-105	Poly(A) polymerase gamma
SMED30014667	-1.26038	-1.39879	-0.170597	-0.820562	-0.449747	ZK1010.1	2e-10	UBQ-2 (ubq-2)	FBpp0077159	2e-10	Ribosomal protein L40	ENSP00000464510	2e-10	ubiquitin B	ENSMUSP00000122797	1e-10	ubiquitin A-52 residue ribosomal protein fusion product 1	UBIQ_CAMDR	7e-10	Ubiquitin [Camelus dromedarius]
SMED30008855	-1.13273	-1.70634	-0.205451	-0.67981	-0.285262	Y76A2A.2b	0	CUA-1, isoform b (cua-1)	FBpp0271765	0	ATP7	ENSP00000383217	0	ATPase, Cu++ transporting, beta polypeptide	ENSMUSP00000106366	0	ATPase, Cu++ transporting, beta polypeptide	ATP7B_MOUSE	0	Copper-transporting ATPase 2
SMED30014918	-0.626489	-0.962154	-0.658173	-0.829922	-1.01329	K11C4.4	2e-33	ODC-1 (odc-1)	FBpp0087939	5e-30	Ornithine decarboxylase 1	ENSP00000385333	6e-38	ornithine decarboxylase 1	ENSMUSP00000128661	3e-40	ornithine decarboxylase, structural 1	DCOR_RAT	1e-39	Ornithine decarboxylase
SMED30014808	-0.976245	-1.57915	-0.362487	-0.962166	-0.294278	K11G12.4a	0	SMF-1, isoform a (smf-1)	FBpp0297443	0	Malvolio	ENSP00000444542	0	solute carrier family 11 (proton-coupled divalent metal ion transporter), member 2	ENSMUSP00000116463	0	solute carrier family 11 (proton-coupled divalent metal ion transporters), member 2	NRAM2_MOUSE	0	Natural resistance-associated macrophage protein 2
SMED30020702	-1.24497	-1.92724	0.80549	-0.111812	1.17764	NA	NA	NA	NA	NA	NA	NA	NA	NA	NA	NA	NA	NA	NA	NA
SMED30017236	-1.25919	-1.74889	0.310606	-0.507696	-0.372632	NA	NA	NA	FBpp0071136	8e-05	TNF-receptor-associated factor 6	ENSP00000337853	1e-05	TNF receptor-associated factor 6, E3 ubiquitin protein ligase	ENSMUSP00000004949	3e-06	TNF receptor-associated factor 6	TRAF6_RAT	1e-06	TNF receptor-associated factor 6
SMED30000248	-1.19941	-1.42212	-0.00731067	-0.425671	-0.645511	F53G12.1.2	5e-66	RAB-11.1 (rab-11.1)	FBpp0083414	1e-67	Rab11	ENSP00000261890	7e-65	RAB11A, member RAS oncogene family	ENSMUSP00000129163	5e-65	RAB11A, member RAS oncogene family	YPTC6_CHLRE	4e-65	Ras-related protein YPTC6 [Chlamydomonas reinhardtii]
SMED30016886	0.0554148	-1.05111	0.01244	-1.38696	-1.82779	NA	NA	NA	NA	NA	NA	NA	NA	NA	NA	NA	NA	NA	NA	NA
SMED30033755	-1.10748	-1.82459	1.19305	0.0846472	-0.499053	NA	NA	NA	NA	NA	NA	NA	NA	NA	NA	NA	NA	NA	NA	NA
SMED30005168	-1.22766	-1.37505	-0.199228	-0.672217	-0.598894	W03G11.3	7e-134	W03G11.3 (W03G11.3)	FBpp0312400	1e-149	alpha-L-fucosidase	ENSP00000002165	3e-174	fucosidase, alpha-L- 2, plasma	ENSMUSP00000113499	6e-176	fucosidase, alpha-L- 2, plasma	FUCO2_RAT	7e-177	Plasma alpha-L-fucosidase
SMED30014122	-0.902017	-0.689802	-0.593031	-0.955704	-0.290149	H14A12.2a	2e-163	FUM-1, isoform a.	FBpp0070915	1e-164	lethal (1) G0255	ENSP00000355518	2e-165	fumarate hydratase	ENSMUSP00000027810	2e-167	fumarate hydratase 1	FUMH_DANRE	7e-165	Fumarate hydratase, mitochondrial
SMED30008017	-1.09224	-1.40808	-0.240433	-0.755523	-0.625009	NA	NA	NA	NA	NA	NA	NA	NA	NA	NA	NA	NA	Y3950_MYCS2	5e-06	Universal stress protein MSMEG_3950/MSMEI_3859
SMED30021415	-0.677856	-1.08206	-0.575895	-0.9183	-0.858466	NA	NA	NA	NA	NA	NA	NA	NA	NA	NA	NA	NA	NA	NA	NA
SMED30009337	-1.17687	-1.62977	-0.191488	-0.852258	-0.693796	NA	NA	NA	NA	NA	NA	NA	NA	NA	NA	NA	NA	NA	NA	NA
SMED30021042	-0.895428	-0.516538	-0.917549	-1.20258	-0.461057	T21C9.6	1e-86	T21C9.6 (T21C9.6)	FBpp0070182	1e-25	NA	NA	NA	NA	NA	NA	NA	PPSA_METJA	2e-37	Probable phosphoenolpyruvate synthase
SMED30008895	-0.585136	-2.43375	0.657148	0.0494315	0.494961	F18E2.2	0	ABCF-1 (abcf-1)	FBpp0073367	0	NA	ENSP00000445100	0	ATP-binding cassette, sub-family F (GCN20), member 1	ENSMUSP00000036881	0	ATP-binding cassette, sub-family F (GCN20), member 1	ABCF1_PIG	0	ATP-binding cassette sub-family F member 1 [Sus scrofa]
SMED30018899	-1.40411	-2.01138	0.313653	-0.304128	0.53307	C02F12.1a	5e-06	TSP-17, isoform b.	FBpp0271912	1e-08	Tetraspanin 39D	ENSP00000267970	2e-12	tetraspanin 3	ENSMUSP00000034876	3e-13	tetraspanin 3	TSN3_MOUSE	2e-12	Tetraspanin-3
SMED30019306	-1.20253	-1.95863	0.329794	-0.317338	0.364186	NA	NA	NA	NA	NA	NA	NA	NA	NA	NA	NA	NA	PDXT_BREBN	2e-39	Pyridoxal 5'-phosphate synthase subunit PdxT
SMED30015925	-0.913549	-1.00382	-0.602633	-0.763424	-0.815557	C05G5.1	5e-52	C05G5.1 (C05G5.1)	FBpp0292379	5e-24	NA	ENSP00000320234	3e-62	major facilitator superfamily domain containing 7	ENSMUSP00000031455	3e-59	major facilitator superfamily domain containing 7A	MFSD7_DANRE	4e-61	Major facilitator superfamily domain-containing protein 7 [Danio rerio]
SMED30033716	-0.843019	-1.81847	-0.0190568	-0.792354	-0.893279	NA	NA	NA	NA	NA	NA	NA	NA	NA	NA	NA	NA	NA	NA	NA
SMED30031273	-0.868642	-1.6392	-0.213991	-0.941394	-0.518838	Y59A8B.21	1e-30	Y59A8B.21 (Y59A8B.21)	FBpp0085408	0.0003	NA	NA	NA	NA	NA	NA	NA	YHJX_ECOLI	9e-14	Uncharacterized MFS-type transporter YhjX [Escherichia coli K-12]
SMED30006083	-0.211969	-0.803443	-0.696939	-0.905928	-1.01711	NA	NA	NA	NA	NA	NA	NA	NA	NA	NA	NA	NA	NA	NA	NA
SMED30034017	-1.23344	-2.22089	0.194967	-0.597979	0.164144	M05B5.4	5e-52	M05B5.4 (M05B5.4)	FBpp0080896	1e-57	NA	ENSP00000219345	5e-56	phospholipase A2, group XV	ENSMUSP00000034377	3e-54	phospholipase A2, group XV	PAG15_HUMAN	2e-55	Group XV phospholipase A2
SMED30003947	-1.01939	-1.29938	-0.217349	-1.04592	-1.07327	T01H8.5e	4e-12	GON-2, isoform b.	FBpp0308223	1e-08	Transient receptor potential cation channel, subfamily M ortholog	ENSP00000300481	7e-14	transient receptor potential cation channel, subfamily M, member 2	ENSMUSP00000101040	9e-15	transient receptor potential cation channel, subfamily M, member 2	TRPM7_MOUSE	9e-14	Transient receptor potential cation channel subfamily M member 7
SMED30027244	-0.741654	-1.29451	1.12251	1.22687	-1.46118	NA	NA	NA	NA	NA	NA	NA	NA	NA	NA	NA	NA	NA	NA	NA
SMED30000902	-0.389621	-0.862254	-0.683843	-0.86661	-1.12616	NA	NA	NA	NA	NA	NA	NA	NA	NA	NA	NA	NA	NA	NA	NA
SMED30030704	-0.402789	-1.28604	-0.864533	-0.733723	-0.953926	NA	NA	NA	NA	NA	NA	NA	NA	NA	NA	NA	NA	NA	NA	NA
SMED30014822	-1.24249	-2.03399	0.112958	-0.456375	0.122263	C01G8.5a	1e-152	ERM-1, isoform b (erm-1)	FBpp0300514	8e-173	Moesin	ENSP00000353408	7e-172	moesin	ENSMUSP00000000590	8e-172	radixin	MOEH_DROME	7e-172	Moesin/ezrin/radixin homolog 1
SMED30004557	-1.01651	-1.82067	-0.1757	-0.76615	-0.27126	F49B2.5	7e-86	SRC-2 (src-2)	FBpp0099944	6e-97	Src oncogene at 64B	ENSP00000350941	6e-104	SRC proto-oncogene, non-receptor tyrosine kinase	ENSMUSP00000105157	2e-103	Rous sarcoma oncogene	SPK1_GIRTI	2e-106	Tyrosine-protein kinase SPK-1 [Girardia tigrina]
SMED30021984	-0.653913	-0.942924	-0.625264	-0.863906	-0.835949	NA	NA	NA	NA	NA	NA	NA	NA	NA	NA	NA	NA	NA	NA	NA
SMED30010316	-1.12629	-1.27921	0.19839	-0.0922334	-1.29861	F38A6.2b	1e-40	ELP-1, isoform b (elp-1)	FBpp0288784	1e-52	Doublecortin-domain-containing echinoderm-microtubule-associated protein ortholog	ENSP00000348842	0	echinoderm microtubule associated protein like 6	ENSMUSP00000051080	0	echinoderm microtubule associated protein like 6	EMAL6_HUMAN	0	Echinoderm microtubule-associated protein-like 6
SMED30035148	-0.087821	-0.778475	-0.863242	-1.20175	-1.53346	NA	NA	NA	NA	NA	NA	NA	NA	NA	NA	NA	NA	NA	NA	NA
SMED30035490	0.115404	-0.286188	-0.893723	-1.12268	-1.21668	NA	NA	NA	NA	NA	NA	NA	NA	NA	NA	NA	NA	NA	NA	NA
SMED30003681	-1.19372	-1.41851	-0.46181	-1.1762	0.379941	F19F10.1	2e-10	F19F10.1 (F19F10.1)	FBpp0308361	6e-09	Ets96B	ENSP00000468636	1e-08	ets variant 4	ENSMUSP00000102794	1e-08	ets variant 4	ETV6_MOUSE	1e-07	Transcription factor ETV6
SMED30034695	-0.743435	-0.880227	-0.451479	-0.856841	-0.886545	NA	NA	NA	NA	NA	NA	NA	NA	NA	NA	NA	NA	NA	NA	NA
SMED30022210	-1.07127	-1.28786	-0.3535	-0.8045	-0.741739	NA	NA	NA	NA	NA	NA	NA	NA	NA	NA	NA	NA	NA	NA	NA
SMED30013960	-1.30635	-1.49112	0.0907336	-0.414226	-0.0223625	F31C3.4	4e-31	F31C3.4 (F31C3.4)	FBpp0082720	2e-24	Zinc/iron regulated transporter-related protein 89B	ENSP00000479421	9e-42	solute carrier family 39 (zinc transporter), member 1	ENSMUSP00000076012	4e-42	solute carrier family 39 (zinc transporter), member 1	S39A1_MOUSE	3e-41	Zinc transporter ZIP1
SMED30010045	-0.961195	-1.97007	-0.309345	-1.00362	-0.224854	NA	NA	NA	FBpp0310483	1e-05	mesh	ENSP00000351075	4e-05	sushi domain containing 2	ENSMUSP00000076802	1e-05	sushi domain containing 2	MESH_BOMMO	1e-08	Protein mesh
SMED30014558	-1.12807	-1.78083	0.00232589	-0.524805	1.09159	NA	NA	NA	NA	NA	NA	NA	NA	NA	NA	NA	NA	NA	NA	NA
SMED30019420	-0.400204	-0.721651	-0.272447	-0.793508	-0.675492	ZK1010.1	3e-06	UBQ-2 (ubq-2)	FBpp0305700	5e-06	NA	ENSP00000471464	1e-05	ubiquitin A-52 residue ribosomal protein fusion product 1	ENSMUSP00000113804	5e-06	KxDL motif containing 1	RL40_TETPY	1e-06	Ubiquitin-60S ribosomal protein L40
SMED30032630	-0.858351	-1.32963	-0.269836	-0.568294	-1.34041	H14E04.1	2e-06	H14E04.1 (H14E04.1)	FBpp0303475	8e-05	NA	ENSP00000358245	0.0005	coenzyme Q3 methyltransferase	NA	NA	NA	Y8948_DICDI	8e-14	Putative methyltransferase DDB_G0268948 [Dictyostelium discoideum]
SMED30006674	-0.981229	-0.899965	-0.407011	-0.47461	-1.59785	NA	NA	NA	NA	NA	NA	NA	NA	NA	NA	NA	NA	NA	NA	NA
SMED30012637	-0.820197	-1.01378	-0.626937	-0.962497	-0.980725	NA	NA	NA	FBpp0077468	1e-14	NA	ENSP00000428672	3e-07	dihydrodiol dehydrogenase (dimeric)	ENSMUSP00000011526	3e-07	dihydrodiol dehydrogenase (dimeric)	YRBE_BACSU	3e-63	Uncharacterized oxidoreductase YrbE [Bacillus subtilis subsp. subtilis str. 168]
SMED30035267	-1.09112	-1.89775	0.128709	-0.881686	0.0350439	BE10.2	1e-60	AGMO-1 (agmo-1)	NA	NA	NA	ENSP00000341662	4e-107	alkylglycerol monooxygenase	ENSMUSP00000123801	8e-110	alkylglycerol monooxygenase	ALKMO_RAT	7e-109	Alkylglycerol monooxygenase
SMED30019697	-0.843865	-0.897614	-0.534793	-0.770089	-0.796156	Y71D11A.3a	8e-107	Y71D11A.3, isoform b (Y71D11A.3)	NA	NA	NA	ENSP00000348459	6e-121	aminocarboxymuconate semialdehyde decarboxylase	ENSMUSP00000048482	1e-124	amino carboxymuconate semialdehyde decarboxylase	ACMSD_MOUSE	8e-124	2-amino-3-carboxymuconate-6-semialdehyde decarboxylase
SMED30031061	-0.183357	-0.583397	-0.894197	-1.06355	-1.1952	F44A6.1a	2e-28	NUCB-1, isoform a (nucb-1)	FBpp0074937	8e-28	NUCB1	ENSP00000385211	2e-33	nucleobindin 1	ENSMUSP00000033096	1e-34	nucleobindin 1	NUCB1_BOVIN	3e-34	Nucleobindin-1
SMED30030679	-1.2539	-1.14083	-0.101959	-0.369979	-0.543389	C40H1.4	2e-05	ELO-4 (elo-4)	FBpp0078581	5e-41	NA	ENSP00000402634	5e-40	ELOVL fatty acid elongase 7	ENSMUSP00000022207	1e-41	ELOVL family member 7, elongation of long chain fatty acids (yeast)	ELOV7_MOUSE	7e-41	Elongation of very long chain fatty acids protein 7
SMED30019298	-0.185512	-1.00071	-0.632765	-1.33965	-1.61148	C44B7.2a.3	3e-81	C44B7.2, isoform b (C44B7.2)	FBpp0300953	1e-81	smooth	ENSP00000469349	3e-104	heterogeneous nuclear ribonucleoprotein L	ENSMUSP00000049407	2e-103	heterogeneous nuclear ribonucleoprotein L	HNRPL_HUMAN	6e-103	Heterogeneous nuclear ribonucleoprotein L
SMED30018924	-0.357998	-0.742479	-0.68834	-0.909146	-1.03544	NA	NA	NA	NA	NA	NA	NA	NA	NA	NA	NA	NA	NA	NA	NA
SMED30005772	0.184958	-1.00612	-0.471806	-0.263555	-1.55074	NA	NA	NA	NA	NA	NA	ENSP00000376504	1e-76	von Willebrand factor A domain containing 5A	ENSMUSP00000113596	2e-68	von Willebrand factor A domain containing 5A	VMA5A_HUMAN	6e-76	von Willebrand factor A domain-containing protein 5A
SMED30015055	-1.14512	-1.91533	0.0787771	-0.813205	-0.515226	C13C4.5	4e-106	C13C4.5 (C13C4.5)	FBpp0088552	1e-110	spinster	ENSP00000309945	1e-117	spinster homolog 1 (Drosophila)	ENSMUSP00000032994	3e-118	spinster homolog 1	SPNS1_DANRE	9e-124	Protein spinster homolog 1
SMED30016340	-1.16952	-1.73331	-0.105433	-0.473286	-0.361887	C09G12.8b	2e-84	CED-10, isoform a (ced-10)	FBpp0072614	2e-86	Rac1	ENSP00000258737	2e-87	ras-related C3 botulinum toxin substrate 1 (rho family, small GTP binding protein Rac1)	ENSMUSP00000079380	1e-87	RAS-related C3 botulinum substrate 1	RAC1_RAT	8e-87	Ras-related C3 botulinum toxin substrate 1
SMED30001567	-0.454023	-0.911503	-0.736616	-0.988637	-1.21685	NA	NA	NA	NA	NA	NA	NA	NA	NA	NA	NA	NA	NA	NA	NA
SMED30022238	-0.107859	-1.38491	-0.472016	-1.0882	-1.32212	K07A1.12	0	LIN-53 (lin-53)	FBpp0082511	0	Chromatin assembly factor 1 subunit	ENSP00000362592	0	retinoblastoma binding protein 4	ENSMUSP00000099658	0	retinoblastoma binding protein 4	RBBP4_HUMAN	0	Histone-binding protein RBBP4
SMED30032112	-0.976761	-0.832293	-0.562174	-1.02819	-0.927613	T01H8.2	2e-56	T01H8.2 (T01H8.2)	FBpp0081504	1e-25	NA	ENSP00000339435	1e-58	serine racemase	ENSMUSP00000067552	5e-56	serine racemase	SRR_ARATH	2e-65	Serine racemase
SMED30000013	-0.851492	-0.999304	-0.637908	-0.84538	-0.828114	NA	NA	NA	FBpp0082783	0.0007	Fasciclin 1	ENSP00000416330	2e-21	transforming growth factor, beta-induced, 68kDa	ENSMUSP00000037719	4e-20	transforming growth factor, beta induced	BGH3_PIG	2e-21	Transforming growth factor-beta-induced protein ig-h3
SMED30001319	-1.12072	-1.47132	-0.104486	-0.541678	-0.370232	Y32F6B.2	5e-45	NCX-5 (ncx-5)	FBpp0309173	2e-96	zydeco	ENSP00000341550	2e-114	solute carrier family 24 (sodium/potassium/calcium exchanger), member 5	ENSMUSP00000063887	1e-106	solute carrier family 24, member 5	NCKX5_DANRE	2e-114	Sodium/potassium/calcium exchanger 5
SMED30028041	-0.889378	-1.36824	-0.166721	-1.19604	-0.861121	T13G4.3	5e-09	TMC-1 (tmc-1)	FBpp0293143	8e-07	NA	ENSP00000397081	8e-27	transmembrane channel-like 7	ENSMUSP00000046927	4e-26	transmembrane channel-like gene family 7	TMC7_CHICK	5e-33	Transmembrane channel-like protein 7 [Gallus gallus]
SMED30021122	-1.04714	-1.47	0.645388	-0.201124	-1.45284	Y105E8A.19	1e-112	Y105E8A.19 (Y105E8A.19)	FBpp0075168	7e-109	Tyrosyl-tRNA synthetase	ENSP00000484192	1e-115	tyrosyl-tRNA synthetase	ENSMUSP00000101669	6e-116	tyrosyl-tRNA synthetase	SYYC_XENTR	6e-120	Tyrosine--tRNA ligase, cytoplasmic
SMED30002442	-1.09609	-1.3779	-0.111139	-0.459102	-0.872485	C42D8.5a	7e-38	ACN-1, isoform a (acn-1)	FBpp0080130	1e-102	Angiotensin converting enzyme	ENSP00000290863	2e-108	angiotensin I converting enzyme	ENSMUSP00000001964	9e-112	angiotensin I converting enzyme (peptidyl-dipeptidase A) 1	ACE_MESAU	5e-110	Angiotensin-converting enzyme
SMED30003044	-0.130113	-0.543655	-0.81299	-0.95	-0.964366	NA	NA	NA	FBpp0088880	2e-12	supercoiling factor	ENSP00000417973	4e-10	calumenin	ENSMUSP00000133609	2e-10	calumenin	CALUA_DANRE	5e-11	Calumenin-A
SMED30009811	-1.00453	-1.01424	-0.366332	-0.571742	-0.572215	C10E2.6	9e-33	C10E2.6 (C10E2.6)	FBpp0086662	9e-22	NA	ENSP00000358794	1e-25	solute carrier family 16, member 4	ENSMUSP00000029502	2e-31	solute carrier family 16 (monocarboxylic acid transporters), member 4	MOT5_MOUSE	2e-30	Monocarboxylate transporter 5
SMED30020497	-0.775161	-1.08266	-0.525805	-0.840712	-1.36338	ZK637.1	5e-34	SVOP-1 (svop-1)	FBpp0310004	5e-22	NA	ENSP00000405482	1e-37	SVOP-like	ENSMUSP00000093743	3e-37	SV2 related protein homolog (rat)-like	SVOP_XENLA	2e-37	Synaptic vesicle 2-related protein
SMED30029442	-1.36147	-1.82179	-0.0614738	-0.524902	0.157388	ZK1067.1b	2e-111	LET-23, isoform c (let-23)	FBpp0071570	1e-96	Epidermal growth factor receptor	ENSP00000415559	3e-67	epidermal growth factor receptor	ENSMUSP00000020329	2e-70	epidermal growth factor receptor	LET23_CAEEL	3e-110	Receptor tyrosine-protein kinase let-23
SMED30019301	-1.29577	-1.7382	0.183109	-0.358749	0.00418826	T08H4.1a	6e-22	RHGF-2 (rhgf-2)	FBpp0291854	2e-30	NA	ENSP00000380185	3e-33	pleckstrin homology domain containing, family G (with RhoGef domain) member 6	ENSMUSP00000037004	1e-34	pleckstrin homology domain containing, family G (with RhoGef domain) member 6	PKHG6_MOUSE	6e-34	Pleckstrin homology domain-containing family G member 6
SMED30003770	-1.10597	-1.67213	-0.15213	-0.810023	-0.464418	NA	NA	NA	NA	NA	NA	NA	NA	NA	NA	NA	NA	NA	NA	NA
SMED30010808	-0.892525	-0.957451	-0.407153	-0.781776	-1.07018	C40H1.4	5e-18	ELO-4 (elo-4)	FBpp0078581	1e-68	NA	ENSP00000358831	2e-62	ELOVL fatty acid elongase 4	ENSMUSP00000034796	1e-61	elongation of very long chain fatty acids (FEN1/Elo2, SUR4/Elo3, yeast)-like 4	ELOV4_MACFA	5e-62	Elongation of very long chain fatty acids protein 4
SMED30016382	-0.71286	-0.678297	-0.633023	-0.836921	-0.898546	NA	NA	NA	NA	NA	NA	NA	NA	NA	NA	NA	NA	NA	NA	NA
SMED30029652	0.900711	-1.37387	-0.682724	-1.12227	-1.34832	C03D6.8	7e-32	RPL-24.2 (rpl-24.2)	FBpp0081879	9e-33	Ribosomal protein L24-like	ENSP00000260443	1e-31	ribosomal L24 domain containing 1	ENSMUSP00000034738	8e-32	ribosomal L24 domain containing 1	RLP24_DANRE	4e-34	Probable ribosome biogenesis protein RLP24
SMED30034179	-0.934208	-1.09024	-0.494394	-0.848551	-0.881632	M03F4.2b.6	1e-20	ACT-4, isoform a.	FBpp0071448	6e-21	Actin 57B	ENSP00000459119	3e-20	actin gamma 1	ENSMUSP00000134296	2e-20	actin, gamma, cytoplasmic 1	ACT_HYDVU	2e-20	Actin, non-muscle 6.2 [Hydra vulgaris]
SMED30029111	-1.11632	-1.09129	-0.407283	-1.04571	-0.497154	R07B7.1	5e-140	CLH-6 (clh-6)	FBpp0086939	4e-117	Chloride channel-b	ENSP00000410907	1e-147	chloride channel, voltage-sensitive 7	ENSMUSP00000124194	3e-156	chloride channel 7	CLCN7_MOUSE	3e-155	H(+)/Cl(-) exchange transporter 7
SMED30032432	-0.406847	-2.1598	0.532658	-0.638387	-0.761522	T04F8.1	3e-96	SFXN-1.5 (sfxn-1.5)	FBpp0078555	1e-115	NA	ENSP00000316905	1e-113	sideroflexin 1	ENSMUSP00000021930	6e-114	sideroflexin 1	SFXN1_SHEEP	2e-114	Sideroflexin-1 [Ovis aries]
SMED30028026	0.0993085	-1.29101	-0.493993	-1.12331	-0.299112	B0336.6.2	2e-19	ABI-1 (abi-1)	FBpp0308012	4e-25	Abelson interacting protein	ENSP00000414703	8e-28	abl-interactor 2	ENSMUSP00000140274	6e-28	abl-interactor 2	ABI2_MOUSE	5e-27	Abl interactor 2
SMED30023751	-0.951326	-2.24206	0.513409	-0.267722	0.0568598	NA	NA	NA	FBpp0074403	2e-37	NA	ENSP00000262428	8e-37	coactosin-like F-actin binding protein 1	ENSMUSP00000126329	2e-36	coactosin-like 1 (Dictyostelium)	COTL1_BOVIN	3e-37	Coactosin-like protein [Bos taurus]
SMED30035250	-0.314825	-0.863281	-0.644423	-1.03227	-1.317	F16F9.1	8e-11	F16F9.1 (F16F9.1)	FBpp0310626	4e-14	NA	ENSP00000483114	2e-11	lipopolysaccharide-induced TNF factor	ENSMUSP00000112667	4e-13	LPS-induced TN factor	LITAF_CHICK	1e-13	Lipopolysaccharide-induced tumor necrosis factor-alpha factor homolog
SMED30024008	-0.292436	-0.804305	-0.293387	-1.15125	-0.716503	NA	NA	NA	FBpp0086114	5e-77	Egg-derived tyrosine phosphatase	ENSP00000334070	2e-94	myotubularin related protein 14	ENSMUSP00000108771	9e-94	myotubularin related protein 14	MTMRE_MOUSE	7e-93	Myotubularin-related protein 14
SMED30002013	-1.23304	-1.582	-0.0435969	-0.0190075	-1.22578	NA	NA	NA	NA	NA	NA	NA	NA	NA	NA	NA	NA	NA	NA	NA
SMED30026629	-0.20374	-1.44886	-0.567704	-1.18226	-1.00909	Y46E12BL.2a	0.0005	Y46E12BL.2 (Y46E12BL.2)	FBpp0073679	0.0003	NA	ENSP00000360031	7e-10	ribosomal RNA processing 12 homolog (S. cerevisiae)	ENSMUSP00000039853	2e-12	ribosomal RNA processing 12 homolog (S. cerevisiae)	RRP12_MOUSE	2e-11	RRP12-like protein [Mus musculus]
SMED30000058	-0.735593	-0.841846	-0.655971	-0.878509	-0.905347	NA	NA	NA	NA	NA	NA	NA	NA	NA	NA	NA	NA	NA	NA	NA
SMED30012387	-1.20214	-1.74179	-0.00841507	-0.943727	-0.29743	T14D7.3	2e-07	SNB-6 (snb-6)	FBpp0271783	3e-07	Synaptobrevin	ENSP00000263864	8e-13	vesicle-associated membrane protein 8	ENSMUSP00000141800	3e-12	Putative uncharacterized protein {ECO:0000313|EMBL:BAE43163.1}	VAMP8_HUMAN	4e-12	Vesicle-associated membrane protein 8
SMED30025050	-0.676673	-1.7482	-0.332307	-1.0783	-0.12346	F11C1.4	7e-27	F11C1.4 (F11C1.4)	FBpp0072611	2e-34	NA	ENSP00000237822	3e-33	chromosome 2 open reading frame 43	ENSMUSP00000042285	8e-34	RIKEN cDNA 1110057K04 gene	CB043_CHICK	2e-36	UPF0554 protein C2orf43 homolog [Gallus gallus]
SMED30022840	-1.36808	-1.52176	0.354396	-0.250922	0.119378	NA	NA	NA	NA	NA	NA	NA	NA	NA	NA	NA	NA	NA	NA	NA
SMED30009281	-0.413713	-0.807469	-0.777316	-0.996596	-1.16886	W03F8.5a	0	LAM-1 (lam-1)	FBpp0079113	1e-125	LanB1	ENSP00000222399	0	laminin, beta 1	ENSMUSP00000132778	0	laminin B1	LAMB1_HUMAN	0	Laminin subunit beta-1
SMED30015783	-0.681322	-1.17895	-0.593266	-0.981051	-0.861246	B0395.2	4e-56	MBOA-1 (mboa-1)	FBpp0293880	2e-52	NA	ENSP00000441356	9e-90	sterol O-acyltransferase 1	ENSMUSP00000058344	8e-87	sterol O-acyltransferase 1	SOAT1_CHLAE	3e-88	Sterol O-acyltransferase 1
SMED30011727	-1.17876	-1.47281	-0.288197	-0.682192	-0.309411	C02F4.1	5e-10	CED-5 (ced-5)	FBpp0303335	1e-46	sponge	ENSP00000280333	8e-61	dedicator of cytokinesis 1	ENSMUSP00000047652	1e-50	dedicator of cyto-kinesis 3	DOCK1_HUMAN	4e-60	Dedicator of cytokinesis protein 1
SMED30019082	-0.804697	-1.14559	-0.583161	-0.956733	-1.02861	NA	NA	NA	NA	NA	NA	ENSP00000270570	5e-76	solute carrier family 47 (multidrug and toxin extrusion), member 1	ENSMUSP00000120907	1e-82	solute carrier family 47, member 2	S47A2_MOUSE	1e-81	Multidrug and toxin extrusion protein 2
SMED30014865	-1.23143	-1.43754	0.179159	-0.543929	-0.153104	F45G2.6	2e-07	TRF-1 (trf-1)	FBpp0306504	0.0001	TNF-receptor-associated factor 4	ENSP00000337853	3e-10	TNF receptor-associated factor 6, E3 ubiquitin protein ligase	ENSMUSP00000004949	2e-10	TNF receptor-associated factor 6	TRAF6_BOVIN	2e-10	TNF receptor-associated factor 6
SMED30007718	-0.30084	-0.90563	0.0315433	-0.785707	-1.90873	NA	NA	NA	FBpp0086484	8e-145	Flotillin 1	ENSP00000365569	5e-136	flotillin 1	ENSMUSP00000001569	4e-137	flotillin 1	FLOT1_DROME	7e-144	Flotillin-1 [Drosophila melanogaster]
SMED30022996	-0.647184	-1.40331	-0.207977	-1.03382	-0.528407	NA	NA	NA	NA	NA	NA	NA	NA	NA	NA	NA	NA	NA	NA	NA
SMED30029728	-0.644831	-0.674995	-0.482901	-0.73736	-0.603262	NA	NA	NA	NA	NA	NA	NA	NA	NA	NA	NA	NA	NA	NA	NA
SMED30005644	-0.299153	-0.767693	-0.807647	-1.02455	-1.23824	NA	NA	NA	NA	NA	NA	NA	NA	NA	NA	NA	NA	NA	NA	NA
SMED30002356	-0.21769	-0.633878	-0.66463	-0.869763	-0.82131	NA	NA	NA	NA	NA	NA	NA	NA	NA	NA	NA	NA	NA	NA	NA
SMED30028764	-1.25921	-1.68644	-0.129666	-0.309591	-0.17217	W07A8.2c	0.0002	W07A8.2, isoform c (W07A8.2)	FBpp0303409	5e-06	tankyrase	ENSP00000280772	5e-08	ankyrin 3, node of Ranvier (ankyrin G)	ENSMUSP00000129173	4e-08	ankyrin repeat domain 65	ANR52_DANRE	2e-07	Serine/threonine-protein phosphatase 6 regulatory ankyrin repeat subunit C
SMED30018929	-0.516274	-0.818612	-0.774624	-1.02487	-1.10687	NA	NA	NA	FBpp0080602	7e-08	NA	NA	NA	NA	NA	NA	NA	NA	NA	NA
SMED30027243	-1.25407	-1.52824	-0.0952302	-0.75967	-0.463086	C06B8.7	1e-07	C06B8.7 (C06B8.7)	FBpp0071659	1e-96	lysyl oxidase-like 2	ENSP00000373783	4e-67	lysyl oxidase-like 2	ENSMUSP00000097987	2e-63	lysyl oxidase-like 2	LOL2A_DANRE	3e-68	Lysyl oxidase homolog 2A
SMED30007877	-1.06458	-1.41261	-0.318187	-0.765005	-0.666019	NA	NA	NA	NA	NA	NA	NA	NA	NA	NA	NA	NA	NA	NA	NA
SMED30012784	-0.987709	-1.5821	-0.416351	-0.766331	-0.595214	H06O01.3a	1e-44	CTG-1, isoform c (ctg-1)	FBpp0072461	3e-54	NA	ENSP00000255858	5e-81	SEC14-like 4 (S. cerevisiae)	ENSMUSP00000003681	1e-81	SEC14-like 2 (S. cerevisiae)	S14L2_BOVIN	4e-84	SEC14-like protein 2
SMED30015309	-1.23112	-1.24024	-0.11354	-0.631245	-0.302214	NA	NA	NA	NA	NA	NA	NA	NA	NA	NA	NA	NA	NA	NA	NA
SMED30033358	-0.822671	-1.50869	-0.589495	-0.891721	-0.615464	ZK909.2g	1e-56	KIN-1, isoform j.	FBpp0079448	7e-56	cAMP-dependent protein kinase 1	ENSP00000479339	1e-56	protein kinase, cAMP-dependent, catalytic, beta	ENSMUSP00000101744	8e-56	protein kinase, cAMP dependent, catalytic, beta	KAPCB_PIG	1e-55	cAMP-dependent protein kinase catalytic subunit beta
SMED30000639	-1.4229	-1.51351	0.0193419	0.194983	0.179931	ZK1151.1b	2e-40	VAB-10, isoform b (vab-10)	FBpp0271730	5e-66	short stop	ENSP00000400883	8e-68	dystonin	ENSMUSP00000138426	1e-71	dystonin	DYST_MOUSE	2e-70	Dystonin
SMED30027587	-0.635969	-1.16307	-0.662394	-0.996764	-0.861284	D1037.3	1e-12	FTN-2 (ftn-2)	FBpp0073576	9e-18	Ferritin 3 heavy chain homologue	ENSP00000484477	4e-19	ferritin, heavy polypeptide 1	ENSMUSP00000025563	3e-20	ferritin heavy chain 1	FRI3_LITCT	2e-23	Ferritin, lower subunit
SMED30031568	-0.335275	-0.629058	-0.769844	-1.1397	-1.43273	ZK1320.4	9e-40	CYP-13A10 (cyp-13A10)	FBpp0074381	4e-26	Cytochrome P450-18a1	ENSP00000378488	7e-29	cytochrome P450, family 1, subfamily A, polypeptide 1	ENSMUSP00000026012	5e-34	cytochrome P450, family 17, subfamily a, polypeptide 1	C13AA_CAEEL	1e-38	Putative cytochrome P450 CYP13A10 [Caenorhabditis elegans]
SMED30010830	-0.809435	-1.21937	-0.579478	-0.917959	-0.810022	F25B5.6c.2	2e-71	F25B5.6, isoform c (F25B5.6)	FBpp0312046	9e-73	NA	ENSP00000362344	1e-77	folylpolyglutamate synthase	ENSMUSP00000028148	4e-77	folylpolyglutamyl synthetase	FOLC_BOVIN	7e-81	Folylpolyglutamate synthase, mitochondrial
SMED30003600	-1.08432	-1.70707	-0.0529013	-0.794656	-0.649597	C09G12.8b	7e-72	CED-10, isoform a (ced-10)	FBpp0076577	4e-72	Rac2	ENSP00000258737	2e-73	ras-related C3 botulinum toxin substrate 1 (rho family, small GTP binding protein Rac1)	ENSMUSP00000079380	1e-73	RAS-related C3 botulinum substrate 1	RAC1_RAT	9e-73	Ras-related C3 botulinum toxin substrate 1
SMED30029153	-1.16946	-0.888907	-0.386457	-1.28524	-0.351579	F37B12.2	0	GCS-1 (gcs-1)	FBpp0309124	0	Glutamate-cysteine ligase catalytic subunit	ENSP00000229416	0	glutamate-cysteine ligase, catalytic subunit	ENSMUSP00000034905	0	glutamate-cysteine ligase, catalytic subunit	GSH1_HUMAN	0	Glutamate--cysteine ligase catalytic subunit
SMED30034597	-0.802553	-0.93014	-0.602746	-0.797452	-0.782656	NA	NA	NA	FBpp0305873	6e-06	Fasciclin 1	ENSP00000416330	1e-24	transforming growth factor, beta-induced, 68kDa	ENSMUSP00000072773	1e-24	periostin, osteoblast specific factor	BGH3_RABIT	4e-24	Transforming growth factor-beta-induced protein ig-h3
SMED30002136	-1.45439	-1.75945	0.214071	-0.24498	0.275588	NA	NA	NA	NA	NA	NA	NA	NA	NA	NA	NA	NA	NA	NA	NA
SMED30015359	-1.10959	-1.45344	-0.182324	-0.690964	-0.829946	C04E6.5	9e-09	C04E6.5 (C04E6.5)	FBpp0086664	5e-08	NA	ENSP00000339957	1e-10	ubiquitin specific peptidase 47	ENSMUSP00000102264	6e-12	ubiquitin specific peptidase 47	UBP30_XENTR	2e-13	Ubiquitin carboxyl-terminal hydrolase 30
SMED30011976	-1.20869	-1.54514	-0.183948	-0.738534	-0.500129	NA	NA	NA	NA	NA	NA	NA	NA	NA	NA	NA	NA	NA	NA	NA
SMED30011283	-1.14483	-1.42201	-0.0494214	-0.520272	-0.679622	NA	NA	NA	NA	NA	NA	NA	NA	NA	NA	NA	NA	NA	NA	NA
SMED30012799	-1.18403	-1.53125	-0.0521119	-0.719033	-0.827362	F31C3.4	1e-23	F31C3.4 (F31C3.4)	FBpp0297714	5e-27	Zinc/iron regulated transporter-related protein 42C.2	ENSP00000479421	1e-35	solute carrier family 39 (zinc transporter), member 1	ENSMUSP00000076012	2e-35	solute carrier family 39 (zinc transporter), member 1	S39A1_BOVIN	3e-35	Zinc transporter ZIP1
SMED30013291	-0.646531	-0.887275	-0.721766	-0.744318	-0.762044	T20G5.6.2	1e-42	UNC-47 (unc-47)	FBpp0086703	4e-38	Vesicular GABA Transporter	ENSP00000217420	5e-40	solute carrier family 32 (GABA vesicular transporter), member 1	ENSMUSP00000036299	1e-40	solute carrier family 32 (GABA vesicular transporter), member 1	VIAAT_XENTR	5e-42	Vesicular inhibitory amino acid transporter
SMED30026425	-1.18459	-1.49481	0.983034	-0.0831944	-1.47496	NA	NA	NA	NA	NA	NA	NA	NA	NA	NA	NA	NA	NA	NA	NA
SMED30029873	0.36367	-0.311852	-0.925616	-0.876291	-1.45981	Y55F3AM.7a	1e-27	EGRH-2 (egrh-2)	FBpp0303083	2e-27	stripe	ENSP00000239938	1e-27	early growth response 1	ENSMUSP00000126931	8e-28	early growth response 1	EGR1_TAEGU	2e-27	Early growth response protein 1
SMED30006795	0.0126595	-1.35327	-0.562574	-1.16803	-1.4091	Y113G7B.17.2	7e-63	PRMT-1 (prmt-1)	FBpp0082589	6e-91	Arginine methyltransferase 3	ENSP00000331879	8e-101	protein arginine methyltransferase 3	ENSMUSP00000032715	3e-99	protein arginine N-methyltransferase 3	ANM3_HUMAN	4e-100	Protein arginine N-methyltransferase 3
SMED30035683	-0.735265	-1.18434	-0.682342	-1.10341	-0.409275	ZK637.8c	0	UNC-32, isoform a (unc-32)	FBpp0290864	0	Vacuolar H[+] ATPase 100kD subunit 1	ENSP00000377415	0	ATPase, H+ transporting, lysosomal V0 subunit a1	ENSMUSP00000044838	0	ATPase, H+ transporting, lysosomal V0 subunit A1	VPP1_PONAB	0	V-type proton ATPase 116 kDa subunit a isoform 1
SMED30031091	-1.24911	-1.46937	-0.066685	-0.482279	0.418982	T25F10.2.2	6e-05	DBL-1 (dbl-1)	FBpp0077405	4e-06	dawdle	ENSP00000266646	7e-12	inhibin, beta E	ENSMUSP00000053977	4e-12	inhibin beta E	INHBE_RAT	1e-11	Inhibin beta E chain
SMED30023050	-1.20623	-1.7164	-0.0357626	-0.164509	-0.274095	F54D8.3a.2	0	ALH-1, isoform a.	FBpp0079406	0	Aldehyde dehydrogenase	ENSP00000261733	0	aldehyde dehydrogenase 2 family (mitochondrial)	ENSMUSP00000031411	0	aldehyde dehydrogenase 2, mitochondrial	ALDH2_RAT	0	Aldehyde dehydrogenase, mitochondrial
SMED30001725	-0.506911	-1.76624	0.0637045	-0.900184	-0.208932	NA	NA	NA	NA	NA	NA	NA	NA	NA	NA	NA	NA	NA	NA	NA
SMED30017818	-1.03356	-1.56932	-0.757881	-0.789911	0.0343304	C34B7.2	5e-113	C34B7.2 (C34B7.2)	FBpp0077133	1e-114	NA	ENSP00000230124	2e-132	FIG4 phosphoinositide 5-phosphatase	ENSMUSP00000039598	8e-130	FIG4 homolog (S. cerevisiae)	FIG4_HUMAN	7e-132	Polyphosphoinositide phosphatase
SMED30003929	-0.865883	-1.44589	-0.569711	-1.04462	-0.427291	NA	NA	NA	NA	NA	NA	NA	NA	NA	NA	NA	NA	PDX1_SUBDO	7e-134	Pyridoxal 5'-phosphate synthase subunit SNZERR
SMED30001121	-1.27637	-1.60518	0.11011	-0.608482	-0.499504	Y4C6A.2c	2e-64	Protein MGL-3, isoform c	FBpp0271834	4e-87	mangetout	ENSP00000355316	7e-78	glutamate receptor, metabotropic 3	ENSMUSP00000004076	1e-78	glutamate receptor, metabotropic 3	GRM3_RAT	1e-79	Metabotropic glutamate receptor 3
SMED30016769	-0.958798	-2.10439	0.137402	-0.242824	0.146997	NA	NA	NA	NA	NA	NA	NA	NA	NA	NA	NA	NA	BDLP_NOSP7	2e-07	Bacterial dynamin-like protein
SMED30003771	-1.13596	-1.60704	-0.116519	-0.532727	-0.12448	F28C6.4a.3	3e-34	F28C6.4, isoform a.	FBpp0087978	7e-35	NA	ENSP00000424619	7e-59	phosphatidylinositol glycan anchor biosynthesis, class G	ENSMUSP00000113818	2e-57	phosphatidylinositol glycan anchor biosynthesis, class G	PIGG_HUMAN	4e-56	GPI ethanolamine phosphate transferase 2
SMED30005863	-1.25114	-1.48165	-0.0680925	-0.286805	-0.184855	NA	NA	NA	FBpp0311525	6e-25	NA	NA	NA	NA	NA	NA	NA	NATT4_THANI	0.0001	Natterin-4
SMED30013319	-0.0724994	-0.75116	-0.872514	-0.418615	-0.606017	Y65B4BL.5a	1e-47	ACS-13 (acs-13)	FBpp0312204	4e-174	bubblegum	ENSP00000464938	8e-179	acyl-CoA synthetase bubblegum family member 2	ENSMUSP00000042352	2e-178	acyl-CoA synthetase bubblegum family member 2	ACBG2_XENLA	0	Long-chain-fatty-acid--CoA ligase ACSBG2
SMED30033529	-1.52052	-0.91334	-0.506456	-0.585702	2.0284	B0019.1	6e-20	AMX-2 (amx-2)	FBpp0076286	8e-06	NA	ENSP00000367309	7e-59	monoamine oxidase B	ENSMUSP00000040550	5e-59	monoamine oxidase B	AOF_DANRE	2e-58	Amine oxidase [flavin-containing]
SMED30016967	-0.869762	-0.672955	-0.753578	-0.913951	-1.02832	Y40B10A.6	1e-55	COMT-4 (comt-4)	NA	NA	NA	ENSP00000361616	1e-47	catechol-O-methyltransferase domain containing 1	ENSMUSP00000119330	4e-47	catechol-O-methyltransferase domain containing 1	CAMT2_DICDI	4e-50	Probable caffeoyl-CoA O-methyltransferase 2
SMED30008762	-0.945877	-1.19214	-0.622731	-0.5551	-0.9856	NA	NA	NA	NA	NA	NA	NA	NA	NA	NA	NA	NA	NA	NA	NA
SMED30028287	-0.0506485	-0.223481	-1.06962	-1.16735	-1.47901	NA	NA	NA	NA	NA	NA	NA	NA	NA	NA	NA	NA	NA	NA	NA
SMED30025865	-0.716452	-1.45265	-0.320653	-1.0274	-0.861305	F22F7.1a	2e-90	F22F7.1, isoform a.	FBpp0078471	7e-122	NA	ENSP00000355467	3e-114	saccharopine dehydrogenase (putative)	ENSMUSP00000040956	1e-112	saccharopine dehydrogenase (putative)	SCPDL_HUMAN	1e-113	Saccharopine dehydrogenase-like oxidoreductase [Homo sapiens]
SMED30000258	-0.806613	-0.825481	-0.554054	-0.749275	-0.771686	F57C12.5a	0	MRP-1, isoform a.	FBpp0089072	0	Multidrug-Resistance like Protein 1	ENSP00000427521	0	ATP-binding cassette, sub-family C (CFTR/MRP), member 3	ENSMUSP00000097743	0	ATP-binding cassette, sub-family C (CFTR/MRP), member 1	MRP1_CHICK	0	Multidrug resistance-associated protein 1
SMED30005578	-1.01302	-1.22058	-0.604879	-0.686322	-0.744494	C10G8.5b	0	NCX-2, isoform d.	FBpp0083402	0	Na/Ca-exchange protein	ENSP00000385811	0	solute carrier family 8 (sodium/calcium exchanger), member 1	ENSMUSP00000132809	0	solute carrier family 8 (sodium/calcium exchanger), member 1	NAC1_HUMAN	0	Sodium/calcium exchanger 1
SMED30023101	-1.15025	-1.48952	-0.240007	-0.655823	-0.543101	B0250.9	2e-26	DHCR-7 (dhcr-7)	NA	NA	NA	ENSP00000347717	3e-55	7-dehydrocholesterol reductase	ENSMUSP00000073541	7e-56	7-dehydrocholesterol reductase	ST7R_ARATH	1e-98	7-dehydrocholesterol reductase
SMED30014131	-0.777622	-1.48885	-0.305635	-0.940859	-0.646663	F29C12.3b	9e-11	RICT-1, isoform a (rict-1)	FBpp0310228	5e-17	rapamycin-insensitive companion of Tor	ENSP00000349959	3e-29	RPTOR independent companion of MTOR, complex 2	ENSMUSP00000051809	2e-29	RPTOR independent companion of MTOR, complex 2	RICTR_HUMAN	1e-28	Rapamycin-insensitive companion of mTOR
SMED30031757	0.545699	-1.685	-0.457143	-1.08949	-0.335988	Y38A8.1	1e-22	NDX-3 (ndx-3)	FBpp0073658	6e-21	NA	ENSP00000365883	2e-23	nudix (nucleoside diphosphate linked moiety X)-type motif 8	ENSMUSP00000119218	5e-26	nudix (nucleoside diphosphate linked moiety X)-type motif 8	NUDT8_MOUSE	4e-25	Nucleoside diphosphate-linked moiety X motif 8, mitochondrial
SMED30035711	-0.938069	-0.962403	-0.260765	-0.739558	-0.819737	F20H11.2	6e-148	LET-765 (let-765)	FBpp0080237	0	NA	ENSP00000267176	9e-142	strawberry notch homolog 1 (Drosophila)	ENSMUSP00000143084	1e-149	NA	SBNO1_RAT	0	Protein strawberry notch homolog 1 [Rattus norvegicus]
SMED30006473	-0.609014	-1.15441	-0.584115	-0.683266	-0.980515	Y59A8B.21	4e-38	Y59A8B.21 (Y59A8B.21)	FBpp0087139	2e-05	Silnoon	ENSP00000360855	3e-05	solute carrier family 16, member 12	ENSMUSP00000009522	0.0009	solute carrier family 16 (monocarboxylic acid transporters), member 12	YHJX_ECOLI	5e-11	Uncharacterized MFS-type transporter YhjX [Escherichia coli K-12]
SMED30018353	-0.631638	-0.843082	-0.718309	-0.916228	-1.20211	NA	NA	NA	NA	NA	NA	ENSP00000379895	1e-119	glycine amidinotransferase (L-arginine:glycine amidinotransferase)	ENSMUSP00000028624	7e-125	glycine amidinotransferase (L-arginine:glycine amidinotransferase)	GATM_MOUSE	5e-124	Glycine amidinotransferase, mitochondrial
SMED30019056	-0.955588	-1.82635	0.0701842	-0.708135	-0.198427	M01F1.5.2	2e-19	HMIT-1.3 (hmit-1.3)	FBpp0087179	5e-14	Trehalose transporter 1-1	ENSP00000280871	2e-22	solute carrier family 2 (facilitated glucose transporter), member 13	ENSMUSP00000104906	6e-44	solute carrier family 2 (facilitated glucose transporter), member 13	MYCT_MOUSE	3e-43	Proton myo-inositol cotransporter
SMED30015825	-0.476209	-0.504342	-0.440549	-1.14146	-1.62472	NA	NA	NA	NA	NA	NA	NA	NA	NA	NA	NA	NA	SUR1_YEAST	9e-21	Mannosyl phosphorylinositol ceramide synthase SUR1 [Saccharomyces cerevisiae S288c]
SMED30002835	-1.66604	-1.47805	-0.107811	-0.617166	1.02393	R13G10.2	6e-18	AMX-1 (amx-1)	FBpp0308562	4e-11	NA	ENSP00000405669	2e-12	lysine (K)-specific demethylase 1B	ENSMUSP00000038373	9e-14	lysine (K)-specific demethylase 1B	PAO_MAIZE	2e-21	Polyamine oxidase
SMED30030364	-1.14703	-1.60523	-0.2344	-0.683005	-0.450567	ZK909.2g	2e-81	KIN-1, isoform j.	FBpp0079448	2e-82	cAMP-dependent protein kinase 1	ENSP00000481980	2e-86	protein kinase, cAMP-dependent, catalytic, beta	ENSMUSP00000099573	4e-88	protein kinase, cAMP dependent, catalytic, beta	KAPCB_BOVIN	1e-87	cAMP-dependent protein kinase catalytic subunit beta
SMED30020630	-0.310191	-0.731785	-0.963975	-1.1478	-1.30727	NA	NA	NA	NA	NA	NA	NA	NA	NA	NA	NA	NA	Y1388_SYNY3	1e-10	Universal stress protein Sll1388
SMED30022130	0.187263	-0.383049	-0.936904	-1.07316	-1.09825	NA	NA	NA	NA	NA	NA	NA	NA	NA	NA	NA	NA	NA	NA	NA
SMED30023988	-1.00888	-1.6416	-0.00689821	-0.690309	-0.722274	ZK1248.14	2e-26	FZO-1 (fzo-1)	FBpp0089221	3e-34	Mitochondrial assembly regulatory factor	ENSP00000349963	3e-33	mitofusin 1	ENSMUSP00000113251	7e-33	mitofusin 1	MARF_DROME	2e-33	Transmembrane GTPase Marf
SMED30033726	-0.675997	-1.27603	-0.668822	-0.68922	-1.12334	K08E7.9	0	PGP-1 (pgp-1)	FBpp0086666	0	Multi drug resistance 50	ENSP00000478255	0	ATP-binding cassette, sub-family B (MDR/TAP), member 1	ENSMUSP00000041204	0	ATP-binding cassette, sub-family B (MDR/TAP), member 1A	MDR1A_MOUSE	0	Multidrug resistance protein 1A
SMED30002903	0.667694	0.205193	-0.267492	-0.169104	0.217319	C27D6.4d	6e-25	CRH-2, isoform b.	FBpp0089339	2e-21	Cyclic-AMP response element binding protein A	ENSP00000481956	3e-34	cAMP responsive element binding protein 3-like 1	ENSMUSP00000028663	4e-35	cAMP responsive element binding protein 3-like 1	CR3L1_RAT	2e-34	Cyclic AMP-responsive element-binding protein 3-like protein 1
SMED30025547	-1.03028	-1.60357	-0.227303	-0.910697	-0.549807	B0035.3	1e-11	B0035.3 (B0035.3)	FBpp0303360	3e-67	NA	ENSP00000358450	2e-75	ganglioside induced differentiation associated protein 2	ENSMUSP00000102610	6e-70	ganglioside-induced differentiation-associated-protein 2	GDAP2_NEMVE	2e-82	Protein GDAP2 homolog [Nematostella vectensis]
SMED30017872	-1.42986	-1.71949	0.849531	-0.148594	0.171754	C09B8.7c	1e-11	PAK-1, isoform a.	FBpp0306609	2e-11	PAK-kinase	ENSP00000464130	8e-15	mitogen-activated protein kinase kinase kinase 3	ENSMUSP00000002044	7e-15	mitogen-activated protein kinase kinase kinase 3	M3K3_HUMAN	4e-14	Mitogen-activated protein kinase kinase kinase 3
SMED30002603	-0.7609	-1.09189	-0.611551	-0.990009	-0.97044	NA	NA	NA	NA	NA	NA	NA	NA	NA	NA	NA	NA	NA	NA	NA
SMED30028142	-0.120909	-0.480163	-0.789056	-0.943323	-1.08495	NA	NA	NA	NA	NA	NA	NA	NA	NA	NA	NA	NA	NA	NA	NA
SMED30010354	-0.515874	-1.75107	0.177316	-0.703973	-0.222366	Y51A2D.5	2e-18	HMIT-1.2 (hmit-1.2)	FBpp0305686	1e-15	Glucose transporter 1	ENSP00000370239	6e-25	solute carrier family 2 (facilitated glucose transporter), member 13	ENSMUSP00000104906	4e-18	solute carrier family 2 (facilitated glucose transporter), member 13	YFIG_BACSU	1e-23	Putative metabolite transport protein YfiG [Bacillus subtilis subsp. subtilis str. 168]
SMED30025787	-1.23535	-1.89446	0.152121	0.531608	-1.02068	K11G12.7	5e-117	ACR-3 (acr-3)	FBpp0073155	2e-132	nicotinic Acetylcholine Receptor beta1	ENSP00000261751	5e-106	cholinergic receptor, nicotinic, beta 4 (neuronal)	ENSMUSP00000034854	1e-112	cholinergic receptor, nicotinic, beta polypeptide 4	ACH3_DROME	3e-131	Acetylcholine receptor subunit beta-like 1
SMED30009267	-0.442756	-0.542419	-0.679967	-0.66766	-0.684339	NA	NA	NA	NA	NA	NA	NA	NA	NA	NA	NA	NA	NA	NA	NA
SMED30024973	-1.2345	-1.61754	0.0267711	-0.366627	0.103284	NA	NA	NA	NA	NA	NA	NA	NA	NA	NA	NA	NA	NA	NA	NA
SMED30025797	-0.778276	-1.24771	-0.571277	-0.897766	-0.811954	F45G2.6	1e-10	TRF-1 (trf-1)	FBpp0077119	4e-16	TNF-receptor-associated factor 4	ENSP00000247668	1e-19	TNF receptor-associated factor 2	ENSMUSP00000028311	5e-19	TNF receptor-associated factor 2	TRAF2_HUMAN	6e-19	TNF receptor-associated factor 2
SMED30008187	-0.939445	-1.36536	-0.187216	-0.914295	-0.874426	F30A10.1	1e-24	CALM-1 (calm-1)	FBpp0293260	7e-25	CIB2 ortholog	ENSP00000258930	1e-26	calcium and integrin binding family member 2	ENSMUSP00000038527	3e-26	calcium and integrin binding family member 2	CIB2_RAT	5e-26	Calcium and integrin-binding family member 2 [Rattus norvegicus]
SMED30022301	-0.159524	-0.70004	-0.713378	-0.95425	-1.5291	NA	NA	NA	NA	NA	NA	NA	NA	NA	NA	NA	NA	NA	NA	NA
SMED30026079	-0.0286774	-1.80065	0.871835	0.0395269	1.78523	Y92H12BL.1a	1e-123	Y92H12BL.1 (Y92H12BL.1)	FBpp0086116	0	NA	ENSP00000274695	0	CDK5 regulatory subunit associated protein 1-like 1	ENSMUSP00000122249	0	CDK5 regulatory subunit associated protein 1-like 1	CDKAL_XENLA	0	Threonylcarbamoyladenosine tRNA methylthiotransferase
SMED30019729	-1.06553	-1.36871	-0.267799	-0.698634	-0.505353	ZC518.1d	6e-54	BEST-22, isoform c (best-22)	FBpp0081661	3e-74	Bestrophin 1	ENSP00000367282	2e-72	bestrophin 1	ENSMUSP00000053408	3e-68	bestrophin 2	BEST1_MACFA	6e-72	Bestrophin-1
SMED30002242	-0.221132	-0.620653	-0.78511	-0.899365	-0.810754	F44A6.1a	7e-25	NUCB-1, isoform a (nucb-1)	FBpp0074937	1e-20	NUCB1	ENSP00000385211	2e-30	nucleobindin 1	ENSMUSP00000033096	8e-32	nucleobindin 1	NUCB1_RAT	5e-31	Nucleobindin-1
SMED30025591	-1.14239	-1.70059	0.326676	-0.578982	0.0182679	H42K12.1a	4e-75	PDK-1, isoform a (pdk-1)	FBpp0072369	9e-86	Phosphoinositide-dependent kinase 1	ENSP00000373876	5e-109	3-phosphoinositide dependent protein kinase 1	ENSMUSP00000061942	3e-109	3-phosphoinositide dependent protein kinase 1	PDPK1_RAT	2e-109	3-phosphoinositide-dependent protein kinase 1
SMED30033710	-1.09192	-1.89242	-0.0454004	-0.779179	-0.338678	NA	NA	NA	NA	NA	NA	ENSP00000338084	1e-69	solute carrier family 47 (multidrug and toxin extrusion), member 2	ENSMUSP00000010267	4e-63	solute carrier family 47, member 1	S47A2_PONAB	1e-70	Multidrug and toxin extrusion protein 2
SMED30002213	-0.679909	-1.78268	-0.478309	-0.981107	-0.375857	F25D7.3a	8e-14	BLMP-1, isoform a (blmp-1)	FBpp0083006	1e-16	glass	ENSP00000447931	1e-16	zinc finger protein 878	ENSMUSP00000051861	5e-14	zinc finger protein 11	GLAS_DROVI	5e-16	Protein glass [Drosophila virilis]
SMED30029098	-0.985629	-1.7193	0.124035	0.129654	0.0856083	NA	NA	NA	FBpp0078980	1e-138	Coproporphyrinogen oxidase	ENSP00000264193	6e-132	coproporphyrinogen oxidase	ENSMUSP00000055455	5e-132	coproporphyrinogen oxidase	HEM6_DROME	1e-137	Oxygen-dependent coproporphyrinogen-III oxidase
SMED30032609	-1.24928	-1.78924	0.116848	-0.612888	-0.239447	Y43F8A.5	9e-05	Y43F8A.5 (Y43F8A.5)	FBpp0073756	2e-09	NA	ENSP00000480703	7e-19	solute carrier family 46 (folate transporter), member 1	ENSMUSP00000001126	1e-19	solute carrier family 46, member 1	S46A3_CHICK	7e-23	Solute carrier family 46 member 3
SMED30005603	-1.32475	-1.62529	-0.0926854	-0.380229	-0.318507	NA	NA	NA	NA	NA	NA	NA	NA	NA	NA	NA	NA	NA	NA	NA
SMED30028574	-1.34097	-1.92768	0.478503	-0.312644	-0.428747	C45H4.2	4e-60	CYP-33C1 (cyp-33C1)	FBpp0074381	6e-61	Cytochrome P450-18a1	ENSP00000301141	2e-66	cytochrome P450, family 2, subfamily A, polypeptide 6	ENSMUSP00000030303	1e-68	cytochrome P450, family 2, subfamily j, polypeptide 6	CP2B4_RABIT	3e-70	Cytochrome P450 2B4
SMED30001026	1.88535	-1.35234	-0.250931	-1.25146	-0.349464	F53G12.10.2	1e-45	RPL-7 (rpl-7)	FBpp0310250	1e-34	Ribosomal protein L7	ENSP00000339795	3e-42	ribosomal protein L7	ENSMUSP00000071616	9e-44	ribosomal protein L7	RL7_CAEEL	1e-44	60S ribosomal protein L7 [Caenorhabditis elegans]
SMED30021265	-1.28547	-1.62961	0.116503	-0.273591	-0.854077	K07B1.4b	2e-100	K07B1.4, isoform b (K07B1.4)	FBpp0308260	3e-69	NA	ENSP00000198801	8e-112	monoacylglycerol O-acyltransferase 2	ENSMUSP00000064041	5e-112	monoacylglycerol O-acyltransferase 2	MOG2A_XENLA	1e-116	2-acylglycerol O-acyltransferase 2-A
SMED30010434	-0.682631	-1.03022	-0.256646	-0.793475	-0.139648	NA	NA	NA	NA	NA	NA	NA	NA	NA	NA	NA	NA	NA	NA	NA
SMED30031869	-0.562943	-0.907452	-0.747461	-0.961849	-1.26586	NA	NA	NA	NA	NA	NA	NA	NA	NA	NA	NA	NA	NA	NA	NA
SMED30013155	-1.25049	-1.57908	0.147949	-0.538509	-0.418096	NA	NA	NA	NA	NA	NA	NA	NA	NA	NA	NA	NA	NA	NA	NA
SMED30023017	-0.637239	-1.39958	-0.274209	-0.829961	-1.04578	NA	NA	NA	NA	NA	NA	NA	NA	NA	NA	NA	NA	NA	NA	NA
SMED30014065	-0.855212	-1.54065	-0.178525	-1.13656	-0.485533	NA	NA	NA	FBpp0087139	4e-06	Silnoon	ENSP00000360855	1e-08	solute carrier family 16, member 12	ENSMUSP00000029502	2e-07	solute carrier family 16 (monocarboxylic acid transporters), member 4	MOT12_HUMAN	6e-08	Monocarboxylate transporter 12
SMED30030917	0.511614	-1.50954	-0.158568	-1.42584	-1.29362	NA	NA	NA	NA	NA	NA	NA	NA	NA	NA	NA	NA	NA	NA	NA
SMED30030622	-1.36422	-1.83558	1.18007	0.277092	0.214911	Y43F8C.12	1e-152	MRP-7 (mrp-7)	FBpp0089069	3e-170	Multidrug-Resistance like Protein 1	ENSP00000382340	1e-173	ATP-binding cassette, sub-family C (CFTR/MRP), member 1	ENSMUSP00000097743	8e-165	ATP-binding cassette, sub-family C (CFTR/MRP), member 1	MRP1_CHICK	2e-168	Multidrug resistance-associated protein 1
SMED30014224	-1.17789	-1.50834	-0.0768408	-0.504671	-0.411164	NA	NA	NA	NA	NA	NA	NA	NA	NA	NA	NA	NA	NA	NA	NA
SMED30024583	-0.760868	-1.39142	-0.23314	-0.942328	-0.703115	NA	NA	NA	NA	NA	NA	NA	NA	NA	NA	NA	NA	NA	NA	NA
SMED30019939	-1.16535	-1.20789	0.0319327	-0.411316	0.138711	NA	NA	NA	NA	NA	NA	ENSP00000338084	1e-55	solute carrier family 47 (multidrug and toxin extrusion), member 2	ENSMUSP00000010267	1e-54	solute carrier family 47, member 1	S47A2_RABIT	1e-57	Multidrug and toxin extrusion protein 2
SMED30030925	-0.691596	-1.36767	-0.329847	-1.10436	-0.769249	NA	NA	NA	NA	NA	NA	NA	NA	NA	NA	NA	NA	NA	NA	NA
SMED30028611	-1.21895	-1.61272	-0.0898086	-0.630963	-0.273454	C54D1.4	1e-134	ALH-10 (alh-10)	FBpp0079406	2e-98	Aldehyde dehydrogenase	ENSP00000265605	9e-174	aldehyde dehydrogenase 8 family, member A1	ENSMUSP00000038878	2e-171	aldehyde dehydrogenase 8 family, member A1	AL8A1_HUMAN	4e-173	Aldehyde dehydrogenase family 8 member A1
SMED30034127	-0.996691	-1.43276	-0.37411	-0.821926	-0.698793	C07G1.1	1e-13	SVH-1 (svh-1)	FBpp0071657	4e-22	NA	ENSP00000483765	1e-21	protease, serine, 33	ENSMUSP00000017086	1e-20	transmembrane serine protease 6	CMA1_CANFA	8e-21	Chymase
SMED30023071	0.890159	0.0439684	-0.671669	-0.745069	-0.707935	NA	NA	NA	NA	NA	NA	NA	NA	NA	NA	NA	NA	NA	NA	NA
SMED30027350	-1.04356	-1.14838	-0.321375	-0.701168	-0.896115	Y71G10AR.4	9e-25	Y71G10AR.4 (Y71G10AR.4)	NA	NA	NA	ENSP00000358663	3e-10	solute carrier family 10, member 3	ENSMUSP00000023835	4e-12	solute carrier family 10, member 2	NTCP2_MOUSE	3e-11	Ileal sodium/bile acid cotransporter
SMED30008487	-1.0508	-2.07819	0.554792	0.238921	1.01985	NA	NA	NA	NA	NA	NA	ENSP00000238256	3e-48	FK506 binding protein 15, 133kDa	ENSMUSP00000081575	3e-21	FK506 binding protein 15	FKB15_HUMAN	2e-47	FK506-binding protein 15
SMED30011590	-1.31452	-1.50699	-0.285185	-0.495389	-0.355749	Y48G8AL.14	4e-86	APS-3 (aps-3)	FBpp0072061	5e-88	orange	ENSP00000338777	1e-83	adaptor-related protein complex 3, sigma 2 subunit	ENSMUSP00000075082	7e-84	adaptor-related protein complex 3, sigma 2 subunit	AP3S2_BOVIN	3e-83	AP-3 complex subunit sigma-2
SMED30033101	-0.766135	-1.69927	0.528401	-0.198355	1.3185	T17E9.2c	8e-148	NMT-1, isoform b.	FBpp0076451	3e-174	N-myristoyl transferase	ENSP00000367407	9e-178	N-myristoyltransferase 2	ENSMUSP00000021314	4e-176	N-myristoyltransferase 1	NMT2_HUMAN	4e-177	Glycylpeptide N-tetradecanoyltransferase 2
SMED30008385	-0.963949	-1.33793	-0.539393	-0.314468	-0.234615	F31F6.6	2e-87	NAC-1 (nac-1)	FBpp0291071	7e-77	I'm not dead yet	ENSP00000316202	3e-103	solute carrier family 13 (sodium-dependent dicarboxylate transporter), member 2	ENSMUSP00000001122	3e-110	solute carrier family 13 (sodium-dependent dicarboxylate transporter), member 2	S13A2_MOUSE	2e-109	Solute carrier family 13 member 2
SMED30003660	-0.861008	-1.39071	-0.465246	-0.685692	-0.399356	T21E12.4	0	DHC-1 (dhc-1)	FBpp0073215	0	Dynein heavy chain 64C	ENSP00000348965	0	dynein, cytoplasmic 1, heavy chain 1	ENSMUSP00000018851	0	dynein cytoplasmic 1 heavy chain 1	DYHC_DROME	0	Dynein heavy chain, cytoplasmic
SMED30028080	-1.14519	-2.21136	0.798751	-0.149412	0.665084	NA	NA	NA	NA	NA	NA	ENSP00000337853	0.0002	TNF receptor-associated factor 6, E3 ubiquitin protein ligase	NA	NA	NA	TRAF6_BOVIN	0.0004	TNF receptor-associated factor 6
SMED30022805	-0.393271	-1.27664	-0.22903	-0.937048	-1.52659	NA	NA	NA	NA	NA	NA	NA	NA	NA	NA	NA	NA	NA	NA	NA
SMED30027991	-0.221582	-1.3161	-0.540684	-1.1552	-1.19771	Y45G12B.3	9e-162	Y45G12B.3 (Y45G12B.3)	FBpp0309284	1e-175	NA	ENSP00000405559	8e-162	L-2-hydroxyglutarate dehydrogenase	ENSMUSP00000021370	4e-155	L-2-hydroxyglutarate dehydrogenase	L2HDH_NEMVE	0	L-2-hydroxyglutarate dehydrogenase, mitochondrial
SMED30021685	-1.19936	-1.35416	-0.38008	-0.576058	-0.668761	T19C3.1	2e-38	BEST-17 (best-17)	FBpp0075371	3e-45	Bestrophin 3	ENSP00000367282	5e-43	bestrophin 1	ENSMUSP00000113053	1e-44	bestrophin 1	BEST1_MOUSE	8e-44	Bestrophin-1
SMED30020797	-0.935401	-1.01303	-0.149791	-0.378475	-0.770468	NA	NA	NA	FBpp0271946	5e-15	NA	ENSP00000356849	6e-13	pogo transposable element with KRAB domain	ENSMUSP00000118270	6e-14	pogo transposable element with KRAB domain	POGK_MOUSE	4e-13	Pogo transposable element with KRAB domain [Mus musculus]
SMED30024938	-1.11385	-1.22469	0.0241561	-0.220498	-0.179279	C26G2.1	4e-08	SYG-2 (syg-2)	NA	NA	NA	ENSP00000271588	5e-05	hemicentin 1	ENSMUSP00000034592	0.0001	Down syndrome cell adhesion molecule like 1	HMCN1_HUMAN	0.0002	Hemicentin-1
SMED30000200	-1.06662	-1.42595	-0.358992	-0.700823	0.310365	ZK688.8	7e-180	GLY-3 (gly-3)	FBpp0110323	3e-180	polypeptide GalNAc transferase 5	ENSP00000269195	0	polypeptide N-acetylgalactosaminyltransferase 1	ENSMUSP00000137427	0	UDP-N-acetyl-alpha-D-galactosamine:polypeptide N-acetylgalactosaminyltransferase 1	GALT1_PIG	0	Polypeptide N-acetylgalactosaminyltransferase 1
SMED30025363	0.349886	-0.940928	-0.661903	-0.964902	-1.36764	NA	NA	NA	NA	NA	NA	NA	NA	NA	NA	NA	NA	NA	NA	NA
SMED30006480	-1.06646	-1.15545	-0.0928826	-0.692028	-0.94201	NA	NA	NA	NA	NA	NA	NA	NA	NA	NA	NA	NA	NA	NA	NA
SMED30020929	-0.518085	-1.03867	-0.487029	-1.19724	-0.85878	F16A11.3b	6e-08	PPFR-1, isoform c (ppfr-1)	NA	NA	NA	ENSP00000383402	2e-28	protein phosphatase 4, regulatory subunit 1	ENSMUSP00000072848	3e-27	protein phosphatase 4, regulatory subunit 1	PP4R1_HUMAN	9e-28	Serine/threonine-protein phosphatase 4 regulatory subunit 1 [Homo sapiens]
SMED30016800	-0.977922	-1.20299	-0.552795	-0.623917	-0.526614	F26D10.3.2	4e-123	HSP-1 (hsp-1)	FBpp0082519	1e-128	Heat shock protein cognate 4	ENSP00000433316	7e-133	heat shock 70kDa protein 8	ENSMUSP00000113722	5e-130	heat shock protein 8	HSP70_ECHGR	8e-130	Heat shock cognate 70 kDa protein
SMED30027148	-0.774143	-0.893832	-0.879887	-1.02045	-0.690553	F59B8.2a.2	0	IDH-1, isoform b.	FBpp0076393	0	Isocitrate dehydrogenase	ENSP00000390265	0	isocitrate dehydrogenase 1 (NADP+), soluble	ENSMUSP00000127307	0	isocitrate dehydrogenase 1 (NADP+), soluble	IDHC_MICOH	0	Isocitrate dehydrogenase [NADP] cytoplasmic
SMED30033685	-1.34155	-1.93271	0.0909951	-0.596048	-0.147027	NA	NA	NA	NA	NA	NA	ENSP00000395259	6e-05	zinc finger, BED-type containing 9	NA	NA	NA	SCND3_HUMAN	0.0003	SCAN domain-containing protein 3
SMED30022154	-0.805282	-1.41158	0.0937827	-1.03853	-0.609845	Y62E10A.9.4	3e-78	RAB-19 (rab-19)	FBpp0304216	4e-78	Rab19	ENSP00000376982	9e-86	RAB43, member RAS oncogene family	ENSMUSP00000077716	3e-84	RAB43, member RAS oncogene family	RAB43_HUMAN	4e-85	Ras-related protein Rab-43
SMED30001950	-0.543242	-0.646093	-0.957661	-1.16294	-0.982651	Y48G1C.2a	3e-26	CSK-1 (csk-1)	FBpp0086841	6e-31	Neurospecific receptor kinase	ENSP00000365386	8e-33	neurotrophic tyrosine kinase, receptor, type 2	ENSMUSP00000078757	4e-33	neurotrophic tyrosine kinase, receptor, type 2	NTRK2_CHICK	1e-32	BDNF/NT-3 growth factors receptor
SMED30024204	-1.12986	-1.617	-0.140804	-0.858616	-0.760788	NA	NA	NA	FBpp0308249	4e-08	NA	NA	NA	NA	NA	NA	NA	NA	NA	NA
SMED30026242	-0.960735	-1.52319	-0.270731	-0.964711	-0.553318	M01D7.2b	5e-33	SCM-1 (scm-1)	FBpp0304842	2e-37	Scamp	ENSP00000481022	1e-44	secretory carrier membrane protein 1	ENSMUSP00000022197	1e-44	secretory carrier membrane protein 1	SCAM1_HUMAN	5e-44	Secretory carrier-associated membrane protein 1
SMED30031267	-0.689586	-0.993607	-0.579427	-0.82245	-1.09293	NA	NA	NA	NA	NA	NA	NA	NA	NA	NA	NA	NA	NA	NA	NA
SMED30005665	-1.31784	-1.73638	-0.365767	-0.28037	1.21894	NA	NA	NA	NA	NA	NA	NA	NA	NA	NA	NA	NA	NA	NA	NA
SMED30011629	-1.39885	-1.36882	0.148611	-0.0543852	1.87979	Y38F1A.10d	7e-20	MAX-2, isoform b.	FBpp0070225	1e-16	pan gu	ENSP00000356130	8e-178	dual serine/threonine and tyrosine protein kinase	ENSMUSP00000035358	0	dual serine/threonine and tyrosine protein kinase	DUSTY_RAT	0	Dual serine/threonine and tyrosine protein kinase
SMED30033905	-1.10586	-1.56593	-0.314325	-0.755369	-0.721545	NA	NA	NA	NA	NA	NA	NA	NA	NA	NA	NA	NA	NA	NA	NA
SMED30012451	-0.64137	-1.66877	0.307776	-0.832034	-0.861489	NA	NA	NA	FBpp0085075	0.0002	Saposin-related	ENSP00000378394	2e-07	prosaposin	NA	NA	NA	SAP_HUMAN	1e-06	Prosaposin
SMED30030491	-1.28568	-1.84686	0.0613921	-0.684468	-0.428705	NA	NA	NA	NA	NA	NA	NA	NA	NA	NA	NA	NA	NA	NA	NA
SMED30014713	-0.288697	-0.66106	-0.753558	-1.02536	-1.29363	NA	NA	NA	NA	NA	NA	NA	NA	NA	NA	NA	NA	NA	NA	NA
SMED30030413	-0.896451	-0.97054	-0.375973	-0.755654	-0.776219	NA	NA	NA	NA	NA	NA	NA	NA	NA	NA	NA	NA	NA	NA	NA
SMED30033621	-0.280576	-0.567371	-0.767562	-1.08237	-1.33246	K11C4.4	6e-64	ODC-1 (odc-1)	FBpp0087939	3e-65	Ornithine decarboxylase 1	ENSP00000385333	5e-75	ornithine decarboxylase 1	ENSMUSP00000128661	5e-79	ornithine decarboxylase, structural 1	DCOR_MOUSE	4e-78	Ornithine decarboxylase
SMED30004408	-1.16404	-1.26896	-0.0291163	-0.251896	-0.351155	NA	NA	NA	NA	NA	NA	ENSP00000328181	3e-13	noggin	ENSMUSP00000061427	2e-13	noggin	NOGG_XENLA	1e-12	Noggin
SMED30008120	0.195139	-0.178336	-0.992671	-1.16019	-1.32436	NA	NA	NA	NA	NA	NA	NA	NA	NA	NA	NA	NA	NA	NA	NA
SMED30014639	-1.59236	-1.61918	0.74097	0.634266	-0.22295	C10G11.5a.2	2e-07	PNK-1, isoform a.	NA	NA	NA	ENSP00000486638	0.0001	pantothenate kinase 4	ENSMUSP00000018990	0.0003	pantothenate kinase 3	PANK2_ARATH	2e-05	Pantothenate kinase 2
SMED30027899	-1.11488	-1.16426	-0.346837	-0.0938375	-0.253577	W01B11.2	1e-32	SULP-6 (sulp-6)	FBpp0074919	2e-23	Prestin	ENSP00000377330	7e-42	solute carrier family 26 (anion exchanger), member 5	ENSMUSP00000110830	4e-41	solute carrier family 26, member 5	S26A5_HUMAN	4e-41	Prestin
SMED30008797	-1.34944	-2.07059	0.32583	0.102437	0.889581	NA	NA	NA	NA	NA	NA	NA	NA	NA	NA	NA	NA	NA	NA	NA
SMED30026101	-0.133518	-0.538877	-0.739468	-0.959888	-1.02483	M03F4.7a	2e-28	CALU-1, isoform a.	FBpp0088881	9e-44	supercoiling factor	ENSP00000054950	7e-42	reticulocalbin 1, EF-hand calcium binding domain	ENSMUSP00000006128	2e-43	reticulocalbin 1	CALUA_DANRE	7e-47	Calumenin-A
SMED30017487	-1.01901	-1.15126	-0.474895	-0.776096	-0.796757	C05D10.3	5e-119	WHT-1 (wht-1)	FBpp0070468	1e-119	white	ENSP00000237612	4e-75	ATP-binding cassette, sub-family G (WHITE), member 2 (Junior blood group)	ENSMUSP00000109933	9e-73	ATP-binding cassette, sub-family G (WHITE), member 2	WHITE_CERCA	2e-120	Protein white [Ceratitis capitata]
SMED30032299	-1.03167	-1.27395	-0.331058	-0.729778	-0.576698	Y42G9A.6a	7e-114	WHT-7, isoform a.	FBpp0070468	3e-139	white	ENSP00000237612	1e-70	ATP-binding cassette, sub-family G (WHITE), member 2 (Junior blood group)	ENSMUSP00000109933	5e-76	ATP-binding cassette, sub-family G (WHITE), member 2	WHITE_DROME	4e-138	Protein white [Drosophila melanogaster]
SMED30010528	1.53073	-0.766367	-0.732724	-1.01454	-1.52382	NA	NA	NA	NA	NA	NA	NA	NA	NA	NA	NA	NA	NA	NA	NA
SMED30023536	-0.930574	-1.36493	-0.128222	-0.629313	-1.21381	NA	NA	NA	NA	NA	NA	ENSP00000356859	2e-20	microsomal glutathione S-transferase 3	ENSMUSP00000028005	5e-20	microsomal glutathione S-transferase 3	MGST3_HUMAN	1e-19	Microsomal glutathione S-transferase 3
SMED30033179	-1.0394	-1.48783	-0.274044	-0.903799	-0.688372	W06H8.1e	0	RME-1, isoform b.	FBpp0082123	0	Putative Achaete Scute Target 1	ENSP00000352354	0	EH-domain containing 1	ENSMUSP00000025684	0	EH-domain containing 1	EHD1_HUMAN	0	EH domain-containing protein 1
SMED30017227	-0.520528	-0.710054	-0.784598	-1.2013	-1.2189	F08B12.2	4e-26	PRX-12 (prx-12)	FBpp0305188	4e-19	Peroxin 12	ENSP00000466894	3e-24	peroxisomal biogenesis factor 12	ENSMUSP00000135632	9e-25	peroxisomal biogenesis factor 12	PEX12_CAEEL	5e-25	Putative peroxisome assembly protein 12
SMED30020865	-0.704213	-0.875017	-0.576687	-0.995864	-1.11373	F49B2.6	7e-61	F49B2.6 (F49B2.6)	FBpp0084752	3e-70	NA	ENSP00000261180	5e-75	thyrotropin-releasing hormone degrading enzyme	ENSMUSP00000057449	2e-75	TRH-degrading enzyme	TRHDE_RAT	4e-76	Thyrotropin-releasing hormone-degrading ectoenzyme
SMED30008318	-0.925383	-1.73723	0.145419	-0.612482	-0.376462	T05C3.2	2e-05	T05C3.2 (T05C3.2)	FBpp0082689	3e-05	NA	ENSP00000451634	5e-33	telomerase-associated protein 1	ENSMUSP00000006444	6e-31	telomerase associated protein 1	TEP1_RAT	3e-30	Telomerase protein component 1
SMED30033916	-1.01167	-1.09469	-0.491952	-0.680017	-0.67387	Y69A2AR.5	2e-64	DAAO-1 (daao-1)	FBpp0078967	6e-72	NA	ENSP00000357920	6e-64	D-aspartate oxidase	ENSMUSP00000019977	4e-60	D-aspartate oxidase	OXDD_HUMAN	8e-64	D-aspartate oxidase
SMED30001740	-1.10465	-1.42055	-0.264857	-0.740049	-0.514136	T05E7.3	3e-46	T05E7.3 (T05E7.3)	FBpp0075208	0	NA	ENSP00000318016	0	KIAA0196	ENSMUSP00000022976	0	RIKEN cDNA E430025E21 gene	STRUM_DANRE	0	WASH complex subunit strumpellin [Danio rerio]
SMED30022614	-0.744888	-1.18933	-0.62043	-0.664327	-1.21344	T05C12.7	0	CCT-1 (cct-1)	FBpp0083683	0	Tcp1-like	ENSP00000317334	0	t-complex 1	ENSMUSP00000116108	0	t-complex protein 1	TCPA_SCHMA	0	T-complex protein 1 subunit alpha
SMED30008269	1.07326	-0.695154	-0.92333	-1.21149	-0.984256	F28D1.10	4e-99	GEX-3 (gex-3)	FBpp0078162	2e-142	HEM-protein	ENSP00000355348	7e-145	NCK-associated protein 1	ENSMUSP00000028386	7e-145	NCK-associated protein 1	NCKP1_DANRE	7e-145	Nck-associated protein 1
SMED30017554	-0.815515	-1.00236	-0.649614	-0.855085	-0.778466	D1037.3	3e-17	FTN-2 (ftn-2)	FBpp0073576	2e-17	Ferritin 3 heavy chain homologue	ENSP00000313691	1e-17	ferritin mitochondrial	ENSMUSP00000025563	1e-17	ferritin heavy chain 1	FRI_PACLE	1e-22	Ferritin [Pacifastacus leniusculus]
SMED30026646	-0.623396	-1.04629	0.0967592	-0.972364	-1.54908	M18.2	3e-11	DLC-2 (dlc-2)	FBpp0070674	5e-11	cut up	ENSP00000477310	3e-10	dynein, light chain, LC8-type 2	ENSMUSP00000077564	1e-10	cDNA sequence BC048507	DYL2_CAEEL	3e-10	Probable dynein light chain 2, cytoplasmic [Caenorhabditis elegans]
SMED30035193	-0.301241	-0.0156458	-0.964472	-0.69229	-2.15239	C47E8.5.4	0	DAF-21 (daf-21)	FBpp0072904	0	Heat shock protein 83	ENSP00000216281	0	heat shock protein 90kDa alpha (cytosolic), class A member 1	ENSMUSP00000021698	0	heat shock protein 90, alpha (cytosolic), class A member 1	HSP83_DROPS	0	Heat shock protein 83
SMED30013493	-1.37068	-1.64503	-0.130326	-0.0653221	0.146248	ZK822.5b.2	2e-06	ZK822.5, isoform a.	FBpp0085220	4e-09	NA	ENSP00000266088	4e-171	solute carrier family 5 (sodium/glucose cotransporter), member 1	ENSMUSP00000011178	1e-179	solute carrier family 5 (sodium/glucose cotransporter), member 1	SC5A9_DANRE	4e-180	Sodium/glucose cotransporter 4
SMED30029305	-1.05736	-1.52411	-0.193394	-0.997345	-0.847544	NA	NA	NA	NA	NA	NA	NA	NA	NA	NA	NA	NA	NA	NA	NA
SMED30007372	-1.31045	-1.99115	0.303184	-0.571405	0.0989874	M01F1.5.2	6e-48	HMIT-1.3 (hmit-1.3)	FBpp0305683	3e-25	Glucose transporter 1	ENSP00000280871	7e-62	solute carrier family 2 (facilitated glucose transporter), member 13	ENSMUSP00000104906	7e-63	solute carrier family 2 (facilitated glucose transporter), member 13	MYCT_MOUSE	5e-62	Proton myo-inositol cotransporter
SMED30007305	-1.03565	-1.57536	-0.303202	-0.878427	-0.736851	NA	NA	NA	NA	NA	NA	NA	NA	NA	NA	NA	NA	NA	NA	NA
SMED30021070	0.172534	-0.538235	0.780222	0.675301	2.14708	B0414.7a	1e-29	MTK-1, isoform b (mtk-1)	FBpp0305556	8e-29	misshapen	ENSP00000462086	1e-29	mitogen-activated protein kinase kinase kinase 3	ENSMUSP00000094326	5e-30	mitogen-activated protein kinase kinase kinase 2	YODA_ARATH	7e-31	Mitogen-activated protein kinase kinase kinase YODA
SMED30015310	-1.16425	-1.71463	-0.0350945	-0.692912	-0.227477	NA	NA	NA	FBpp0071470	1e-22	NA	NA	NA	NA	NA	NA	NA	NA	NA	NA
SMED30007566	-0.261304	0.529836	-1.25855	0.21096	-0.0554839	C50C3.9c	4e-36	UNC-36, isoform a.	FBpp0304633	3e-48	NA	ENSP00000417279	4e-52	calcium channel, voltage-dependent, alpha 2/delta subunit 3	ENSMUSP00000022567	7e-54	calcium channel, voltage-dependent, alpha2/delta subunit 3	CA2D3_MOUSE	5e-53	Voltage-dependent calcium channel subunit alpha-2/delta-3
SMED30004297	-0.235718	-2.26088	0.462181	-0.598958	0.734425	T16G1.11	3e-34	EIF-3.K (eif-3.K)	FBpp0071587	4e-49	NA	ENSP00000248342	2e-60	eukaryotic translation initiation factor 3, subunit K	ENSMUSP00000066038	2e-60	eukaryotic translation initiation factor 3, subunit K	EIF3K_XENTR	5e-60	Eukaryotic translation initiation factor 3 subunit K
SMED30023722	-0.68158	-1.47584	-0.626266	-1.20963	-0.738719	Y45F3A.2	6e-28	RAB-30 (rab-30)	FBpp0304216	2e-28	Rab19	ENSP00000310226	2e-27	RAB1B, member RAS oncogene family	ENSMUSP00000025804	3e-28	RAB1B, member RAS oncogene family	YPT1_YEAST	1e-27	GTP-binding protein YPT1
SMED30025349	-0.522942	-0.633279	-0.600228	-0.768743	-0.905814	NA	NA	NA	NA	NA	NA	NA	NA	NA	NA	NA	NA	NA	NA	NA
SMED30027712	-0.749539	-1.77091	-0.61509	-0.545725	-0.688916	K11D12.9	0.0003	K11D12.9 (K11D12.9)	NA	NA	NA	ENSP00000395230	6e-05	X-linked inhibitor of apoptosis, E3 ubiquitin protein ligase	ENSMUSP00000026978	5e-05	X-linked inhibitor of apoptosis	BIR7A_XENLA	3e-06	Baculoviral IAP repeat-containing protein 7-A
SMED30017792	-1.25706	-2.21986	0.470706	-0.4786	-0.134438	NA	NA	NA	NA	NA	NA	NA	NA	NA	NA	NA	NA	NA	NA	NA
SMED30005357	-0.329999	-0.654819	-0.79201	-1.07847	-1.31446	NA	NA	NA	NA	NA	NA	NA	NA	NA	NA	NA	NA	NA	NA	NA
SMED30004081	-0.804207	-0.988512	-0.612739	-0.796893	-0.77018	NA	NA	NA	NA	NA	NA	ENSP00000364393	2e-05	tenascin XB	ENSMUSP00000084661	4e-06	tenascin XB	TENX_HUMAN	0.0002	Tenascin-X
SMED30016551	-1.1043	-1.864	0.0430588	-0.828065	-0.533949	NA	NA	NA	NA	NA	NA	NA	NA	NA	NA	NA	NA	NA	NA	NA
SMED30011179	-0.616582	-1.29109	0.437856	0.144506	-2.07901	NA	NA	NA	NA	NA	NA	NA	NA	NA	NA	NA	NA	NA	NA	NA
SMED30009446	-0.268941	-1.43775	-0.645934	-0.401589	-0.245242	C53D5.5b.3	1e-92	C53D5.5 (C53D5.5)	FBpp0111907	4e-88	NA	ENSP00000383231	4e-100	gamma-glutamyltransferase 1	ENSMUSP00000006508	2e-109	gamma-glutamyltransferase 1	GGT1_RAT	3e-110	Gamma-glutamyltranspeptidase 1
SMED30019340	-1.07903	-1.45819	-0.1904	-0.53924	-0.663046	NA	NA	NA	NA	NA	NA	NA	NA	NA	NA	NA	NA	NA	NA	NA
SMED30030864	-1.19809	-2.10226	0.449536	-0.0422969	1.39304	NA	NA	NA	NA	NA	NA	ENSP00000270570	1e-89	solute carrier family 47 (multidrug and toxin extrusion), member 1	ENSMUSP00000010267	7e-87	solute carrier family 47, member 1	S47A1_DANRE	3e-92	Multidrug and toxin extrusion protein 1
SMED30020376	-1.33326	-1.56234	0.0513619	-0.270687	-0.0457968	B0350.2g.2	1e-06	UNC-44, isoform a (unc-44)	FBpp0306187	2e-08	Ankyrin 2	ENSP00000428309	4e-08	ankyrin repeat domain 6	ENSMUSP00000087177	1e-08	GA repeat binding protein, beta 1	OSTF1_DANRE	8e-10	Osteoclast-stimulating factor 1 [Danio rerio]
SMED30029814	-0.948857	-2.09988	0.374063	-0.45592	0.408446	C38C10.2	3e-79	C38C10.2 (C38C10.2)	FBpp0308734	5e-108	Major Facilitator Superfamily Transporter 10	ENSP00000348019	1e-109	solute carrier family 17 (acidic sugar transporter), member 5	ENSMUSP00000020102	4e-102	solute carrier family 17 (sodium-dependent inorganic phosphate cotransporter), member 8	S17A5_HUMAN	6e-109	Sialin
SMED30022325	-0.52513	-1.10896	-0.424422	-0.853889	-1.50496	NA	NA	NA	NA	NA	NA	NA	NA	NA	NA	NA	NA	NA	NA	NA
SMED30001279	-1.07685	-1.11374	-0.531771	-0.719212	-0.657476	NA	NA	NA	NA	NA	NA	ENSP00000297873	3e-12	Williams Beuren syndrome chromosome region 27	ENSMUSP00000106849	4e-15	Williams Beuren syndrome chromosome region 27 (human)	WBS27_HUMAN	1e-11	Williams-Beuren syndrome chromosomal region 27 protein [Homo sapiens]
SMED30001635	-1.10667	-1.2157	-0.487615	-1.07977	-0.559922	W07B8.5	4e-109	CPR-5 (cpr-5)	FBpp0311925	2e-110	Cathepsin B1	ENSP00000434217	2e-132	cathepsin B	ENSMUSP00000006235	8e-134	cathepsin B	CATB_RAT	1e-134	Cathepsin B
SMED30023398	-0.268659	-0.681054	-0.967489	-1.04176	-1.25397	NA	NA	NA	NA	NA	NA	NA	NA	NA	NA	NA	NA	NA	NA	NA
SMED30003809	-0.727116	-0.902815	-0.64228	-0.805249	-0.738076	NA	NA	NA	FBpp0292877	6e-39	Apolipoprotein lipid transfer particle	ENSP00000470478	3e-38	Protein LOC400499 {ECO:0000313|Ensembl:ENSP00000470478}	ENSMUSP00000036044	4e-18	apolipoprotein B	VIT_FENME	3e-36	Vitellogenin
SMED30032349	-1.49823	-1.63422	0.162746	-0.518713	0.100638	K04G2.2	3e-53	AHO-3 (aho-3)	FBpp0310942	3e-50	NA	ENSP00000258884	7e-53	abhydrolase domain containing 17C	ENSMUSP00000112988	2e-54	abhydrolase domain containing 17C	AB17C_DANRE	2e-56	Alpha/beta hydrolase domain-containing protein 17C [Danio rerio]
SMED30031474	-1.33668	-1.57489	-0.218876	-0.680593	0.135429	T24C12.3	9e-81	T24C12.3 (T24C12.3)	FBpp0077727	4e-100	NA	NA	NA	NA	NA	NA	NA	YOW5_SCHPO	4e-68	Pseudouridine-metabolizing bifunctional protein C1861.05
SMED30014138	-1.31751	-1.6958	-0.0443129	-0.710311	-0.601566	ZC247.3	7e-34	LIN-11 (lin-11)	FBpp0071216	5e-36	NA	ENSP00000477829	1e-38	LIM homeobox 1	ENSMUSP00000018842	1e-38	LIM homeobox protein 1	LHX1_CHICK	2e-38	LIM/homeobox protein Lhx1
SMED30034418	-1.20117	-1.63841	-0.0597345	-0.713551	-0.734238	C35C5.4	2e-57	MIG-2 (mig-2)	FBpp0084563	3e-55	Mig-2-like	ENSP00000258737	3e-54	ras-related C3 botulinum toxin substrate 1 (rho family, small GTP binding protein Rac1)	ENSMUSP00000079380	2e-54	RAS-related C3 botulinum substrate 1	RAC1_RAT	1e-53	Ras-related C3 botulinum toxin substrate 1
SMED30017038	-1.11747	-1.84345	-0.188112	-0.443524	0.218609	M01F1.5.2	3e-31	HMIT-1.3 (hmit-1.3)	FBpp0086060	5e-20	NA	ENSP00000280871	4e-34	solute carrier family 2 (facilitated glucose transporter), member 13	ENSMUSP00000104906	1e-53	solute carrier family 2 (facilitated glucose transporter), member 13	MYCT_MOUSE	8e-53	Proton myo-inositol cotransporter
SMED30026414	-0.0642414	-0.308237	-0.840347	-1.09889	-1.25542	ZK470.1	3e-17	ZK470.1 (ZK470.1)	FBpp0073040	5e-23	NA	ENSP00000469836	4e-18	MPV17 mitochondrial membrane protein-like 2	ENSMUSP00000037929	8e-17	MPV17 mitochondrial membrane protein-like 2	M17L2_DANRE	2e-25	Mpv17-like protein 2 [Danio rerio]
SMED30010270	-0.918396	-1.00438	-0.773207	-0.808319	-0.69254	Y50D7A.7	0	ADS-1 (ads-1)	FBpp0086558	0	NA	ENSP00000264167	0	alkylglycerone phosphate synthase	ENSMUSP00000041967	0	alkylglycerone phosphate synthase	ADAS_MOUSE	0	Alkyldihydroxyacetonephosphate synthase, peroxisomal
SMED30030204	-0.134015	-0.945664	-0.723872	-0.985514	-1.04516	NA	NA	NA	NA	NA	NA	NA	NA	NA	NA	NA	NA	NA	NA	NA
SMED30022880	-1.22072	-1.87849	1.34412	0.521921	1.33711	Y71A12C.2	1e-48	Y71A12C.2 (Y71A12C.2)	FBpp0074261	2e-46	Stasimon	ENSP00000406885	1e-62	transmembrane protein 41A	ENSMUSP00000023562	4e-62	transmembrane protein 41a	T41AA_DANRE	2e-64	Transmembrane protein 41A-A
SMED30000850	-0.780172	-0.785932	-0.587742	-0.883272	-0.972404	F27C8.1	1e-80	AAT-1 (aat-1)	FBpp0306617	5e-89	NA	ENSP00000280612	2e-100	solute carrier family 7 (anionic amino acid transporter light chain, xc- system), member 11	ENSMUSP00000029297	6e-99	solute carrier family 7 (cationic amino acid transporter, y+ system), member 11	XCT_HUMAN	8e-100	Cystine/glutamate transporter
SMED30005941	-0.558765	-1.41542	-0.530519	-1.10413	-1.17959	Y17G9B.3	9e-33	CYP-31A3 (cyp-31A3)	FBpp0070371	3e-28	Cytochrome P450-4d2	ENSP00000261835	5e-67	cytochrome P450, family 46, subfamily A, polypeptide 1	ENSMUSP00000021684	6e-66	cytochrome P450, family 46, subfamily a, polypeptide 1	CP46A_HUMAN	2e-66	Cholesterol 24-hydroxylase
SMED30029849	-1.24781	-1.58667	-0.0685563	-0.688802	-0.198227	C13D9.7	1e-55	NCX-8 (ncx-8)	FBpp0308435	3e-30	NA	ENSP00000448758	9e-43	solute carrier family 8 (sodium/lithium/calcium exchanger), member B1	ENSMUSP00000107520	8e-45	solute carrier family 8 (sodium/lithium/calcium exchanger), member B1	NCKX6_RAT	8e-44	Sodium/potassium/calcium exchanger 6, mitochondrial
SMED30004063	-1.05258	-1.28374	-0.526946	-0.644817	0.417244	C39F7.4	4e-105	RAB-1 (rab-1)	FBpp0083503	3e-107	Rab1	ENSP00000310226	2e-111	RAB1B, member RAS oncogene family	ENSMUSP00000025804	4e-112	RAB1B, member RAS oncogene family	RAB1A_LYMST	5e-113	Ras-related protein Rab-1A [Lymnaea stagnalis]
SMED30027137	0.144024	-0.532631	-0.873408	-0.981944	-1.06452	NA	NA	NA	NA	NA	NA	NA	NA	NA	NA	NA	NA	NA	NA	NA
SMED30028793	-0.936347	-1.46058	-0.526812	-0.932569	-0.973287	F27E11.2a.3	2e-60	F27E11.2, isoform a (F27E11.2)	FBpp0089107	2e-91	NA	ENSP00000365413	4e-108	solute carrier family 28 (concentrative nucleoside transporter), member 3	ENSMUSP00000022036	3e-110	solute carrier family 28 (sodium-coupled nucleoside transporter), member 3	S28A3_EPTST	5e-122	Solute carrier family 28 member 3
SMED30029369	-1.47761	-1.8031	0.459149	-0.0379574	0.297289	F59B2.7	1e-16	RAB-6.1 (rab-6.1)	FBpp0312096	5e-17	Rab6	ENSP00000437797	2e-16	RAB6B, member RAS oncogene family	ENSMUSP00000035155	2e-16	RAB6B, member RAS oncogene family	YPT6_YEAST	1e-16	GTP-binding protein YPT6 [Saccharomyces cerevisiae S288c]
SMED30031134	-1.01685	-1.57255	-0.396128	-0.901204	-0.738468	F31F6.6	4e-46	NAC-1 (nac-1)	FBpp0291071	4e-36	I'm not dead yet	ENSP00000279027	3e-54	solute carrier family 13 (sodium-dependent dicarboxylate transporter), member 3	ENSMUSP00000029208	6e-53	solute carrier family 13 (sodium-dependent dicarboxylate transporter), member 3	S13A3_HUMAN	1e-53	Solute carrier family 13 member 3
SMED30003360	-1.30332	-1.96371	0.0600362	-0.694184	-0.427071	F54F3.3	9e-98	LIPL-1 (lipl-1)	FBpp0079682	4e-80	Lipase 4	ENSP00000238983	1e-108	lipase, gastric	ENSMUSP00000025680	4e-103	lipase, gastric	LIPG_CANFA	2e-108	Gastric triacylglycerol lipase
SMED30018252	-1.31509	-1.69058	-0.148521	-0.770052	-0.266976	T03E6.7a	2e-105	CPL-1, isoform a.	FBpp0086718	4e-109	Cysteine proteinase-1	ENSP00000365061	2e-111	cathepsin L	ENSMUSP00000021933	2e-110	cathepsin L	CYSP2_HOMAM	9e-117	Digestive cysteine proteinase 2
SMED30013312	-0.630423	-0.943986	-0.49386	-0.856493	-1.62403	C06G4.2b.2	2e-140	CLP-1, isoform c (clp-1)	FBpp0293217	0	Calpain-B	ENSP00000271971	7e-173	calpain 9	ENSMUSP00000090717	1e-168	calpain 9	CAN_SCHMA	0	Calpain
SMED30004747	-1.11229	-1.59823	-0.112453	-0.930837	-0.44353	C36A4.2	3e-55	CYP-25A2 (cyp-25A2)	FBpp0072228	1e-73	Cytochrome P450-9c1	ENSP00000337915	2e-99	cytochrome P450, family 3, subfamily A, polypeptide 4	ENSMUSP00000091659	6e-104	cytochrome P450, family 3, subfamily a, polypeptide 41A	CP3A9_RAT	7e-104	Cytochrome P450 3A9
SMED30021059	-0.483636	-0.903812	-0.646296	-0.48193	-1.1029	NA	NA	NA	FBpp0071136	1e-09	TNF-receptor-associated factor 6	ENSP00000337853	7e-10	TNF receptor-associated factor 6, E3 ubiquitin protein ligase	ENSMUSP00000004949	5e-09	TNF receptor-associated factor 6	TRAF6_BOVIN	3e-09	TNF receptor-associated factor 6
SMED30032823	-0.704077	-0.91444	-0.660837	-0.758594	-0.662309	C07G1.1	1e-50	SVH-1 (svh-1)	FBpp0076252	4e-93	Tequila	ENSP00000296498	5e-85	protease, serine, 12 (neurotrypsin, motopsin)	ENSMUSP00000029603	1e-85	protease, serine 12 neurotrypsin (motopsin)	NETR_SAGLB	9e-86	Neurotrypsin
SMED30002443	-1.26527	-1.64221	0.34205	-0.689985	-0.331041	NA	NA	NA	NA	NA	NA	ENSP00000326671	1e-30	solute carrier family 47 (multidrug and toxin extrusion), member 2	ENSMUSP00000010267	5e-22	solute carrier family 47, member 1	S47A2_HUMAN	6e-30	Multidrug and toxin extrusion protein 2
SMED30018088	0.197818	0.133856	-1.21722	-1.35993	-0.875717	NA	NA	NA	NA	NA	NA	NA	NA	NA	NA	NA	NA	NA	NA	NA
SMED30027997	-0.672967	-1.29912	-0.636829	-0.896963	-1.2451	Y46G5A.17	0	CPT-1 (cpt-1)	FBpp0087400	0	withered	ENSP00000446108	0	carnitine palmitoyltransferase 1A (liver)	ENSMUSP00000025835	0	carnitine palmitoyltransferase 1a, liver	CPT1A_HUMAN	0	Carnitine O-palmitoyltransferase 1, liver isoform
SMED30022575	1.53021	-1.33894	0.052606	-1.51611	-1.0699	R13A5.12	3e-75	LPD-7 (lpd-7)	FBpp0079445	1e-85	NA	ENSP00000334612	1e-90	pescadillo ribosomal biogenesis factor 1	ENSMUSP00000020705	3e-94	pescadillo homolog 1, containing BRCT domain (zebrafish)	PESC_NEMVE	2e-103	Pescadillo homolog [Nematostella vectensis]
SMED30030539	-1.55582	-1.66199	0.89701	0.661964	0.845984	F07B10.1a	2e-76	CLN-3.1, isoform b (cln-3.1)	FBpp0305846	5e-76	cln3	ENSP00000353116	9e-76	ceroid-lipofuscinosis, neuronal 3	ENSMUSP00000111973	9e-77	ceroid lipofuscinosis, neuronal 3, juvenile (Batten, Spielmeyer-Vogt disease)	CLN3_CANFA	5e-90	Battenin
SMED30010986	-1.31864	-1.70601	0.24006	-0.568374	-0.250527	NA	NA	NA	FBpp0071659	2e-94	lysyl oxidase-like 2	ENSP00000373783	7e-68	lysyl oxidase-like 2	ENSMUSP00000097987	1e-69	lysyl oxidase-like 2	LOL2A_DANRE	1e-71	Lysyl oxidase homolog 2A
SMED30010200	-1.05253	-1.89643	-0.0205612	-0.82289	-0.360735	K06A4.5	4e-35	HAAO-1 (haao-1)	NA	NA	NA	ENSP00000294973	3e-45	3-hydroxyanthranilate 3,4-dioxygenase	ENSMUSP00000000687	4e-48	3-hydroxyanthranilate 3,4-dioxygenase	3HAO_RAT	1e-47	3-hydroxyanthranilate 3,4-dioxygenase
SMED30013482	-1.18395	-1.99359	0.6946	-0.434817	0.287565	NA	NA	NA	NA	NA	NA	NA	NA	NA	NA	NA	NA	NA	NA	NA
SMED30010404	-0.265127	-0.696239	-0.89016	-1.04889	-1.20315	NA	NA	NA	NA	NA	NA	NA	NA	NA	NA	NA	NA	NA	NA	NA
SMED30002215	-0.764878	-1.0093	-0.574558	-1.00432	-0.98701	NA	NA	NA	NA	NA	NA	NA	NA	NA	NA	NA	NA	NA	NA	NA
SMED30022596	-1.01472	-2.00689	0.150603	-0.530607	-0.0536612	NA	NA	NA	FBpp0073387	0.0007	RNA polymerase II 215kD subunit	NA	NA	NA	NA	NA	NA	NA	NA	NA
SMED30031049	-1.28397	-1.79484	0.247757	-0.823741	-0.53534	Y53G8AR.7a	7e-37	Y53G8AR.7, isoform a.	FBpp0076591	2e-58	NA	ENSP00000296468	2e-60	major facilitator superfamily domain containing 8	ENSMUSP00000026859	8e-58	major facilitator superfamily domain containing 8	MFSD8_XENLA	7e-69	Major facilitator superfamily domain-containing protein 8 [Xenopus laevis]
SMED30019369	0.025088	-0.327348	-0.936662	-1.1127	-1.19472	NA	NA	NA	NA	NA	NA	NA	NA	NA	NA	NA	NA	NA	NA	NA
SMED30034124	-1.1075	-1.5522	-0.49483	-0.774294	-0.403282	NA	NA	NA	FBpp0078467	9e-08	retinophilin	ENSP00000307636	2e-13	MORN repeat containing 4	ENSMUSP00000062887	7e-14	MORN repeat containing 4	MORN4_MOUSE	5e-13	MORN repeat-containing protein 4 [Mus musculus]
SMED30018718	0.0878078	-1.59703	-0.110006	-1.44492	-1.08047	Y48B6A.13b	2e-58	Y48B6A.13, isoform b (Y48B6A.13)	FBpp0312007	2e-65	NA	ENSP00000301012	5e-64	mevalonate (diphospho) decarboxylase	ENSMUSP00000006692	7e-63	mevalonate (diphospho) decarboxylase	MVD1_DANRE	3e-65	Diphosphomevalonate decarboxylase
SMED30003140	-1.26183	-1.19036	-0.422897	-0.638644	-0.501309	H06H21.10c	2e-174	TAT-2, isoform a (tat-2)	FBpp0074079	0	NA	ENSP00000321195	0	ATPase, class VI, type 11B	ENSMUSP00000029257	0	ATPase, class VI, type 11B	AT11B_HUMAN	0	Probable phospholipid-transporting ATPase IF
SMED30017412	-0.948366	-1.43021	-0.36239	-0.725652	-0.65501	C50H11.15	2e-63	CYP-33C9 (cyp-33C9)	FBpp0074381	1e-58	Cytochrome P450-18a1	ENSP00000324648	8e-68	cytochrome P450, family 2, subfamily B, polypeptide 6	ENSMUSP00000003100	4e-76	cytochrome P450, family 2, subfamily f, polypeptide 2	CP2F2_RAT	2e-75	Cytochrome P450 2F2
SMED30005161	-0.750845	-1.59772	-0.132031	-0.890012	-0.663876	Y57A10A.26.2	1e-43	Y57A10A.26 (Y57A10A.26)	FBpp0099912	4e-38	failed axon connections	ENSP00000374328	1e-37	failed axon connections homolog (Drosophila)	ENSMUSP00000029908	9e-38	failed axon connections homolog (Drosophila)	FAXC_RAT	3e-37	Failed axon connections homolog [Rattus norvegicus]
SMED30029159	-0.695463	-1.09042	-0.377646	-0.729581	-1.38033	NA	NA	NA	NA	NA	NA	NA	NA	NA	NA	NA	NA	NA	NA	NA
SMED30005028	-1.0817	-1.41182	-0.113607	-0.61079	0.143936	B0350.2g.2	2e-26	UNC-44, isoform a (unc-44)	FBpp0306187	5e-29	Ankyrin 2	ENSP00000387233	4e-30	ankyrin repeat domain 44	ENSMUSP00000014640	8e-30	ankyrin repeat domain 28	ANR28_MOUSE	6e-29	Serine/threonine-protein phosphatase 6 regulatory ankyrin repeat subunit A
SMED30019899	-1.39194	-1.82661	1.44971	0.181122	0.0828332	C54E4.5	2e-92	C54E4.5 (C54E4.5)	FBpp0288569	3e-105	NA	ENSP00000216075	2e-103	myo-inositol oxygenase	ENSMUSP00000023282	1e-104	myo-inositol oxygenase	MIOX_DANRE	3e-110	Inositol oxygenase
SMED30019668	-0.872056	-1.90847	0.220821	-1.12463	-0.0206493	C28C12.7a	5e-07	SPP-10, isoform b.	FBpp0085075	5e-20	Saposin-related	ENSP00000378394	6e-18	prosaposin	ENSMUSP00000100594	6e-13	prosaposin-like 1	SAP_HUMAN	3e-17	Prosaposin
SMED30009787	-0.778957	-1.15295	-0.565091	-0.893432	-1.02124	T22A3.8	0	LAM-3 (lam-3)	FBpp0293600	0	wing blister	ENSP00000374309	0	laminin, alpha 1	ENSMUSP00000043957	0	laminin, alpha 1	LAMA1_HUMAN	0	Laminin subunit alpha-1
SMED30013193	-0.852036	-1.70387	-0.254352	-0.849151	-0.872873	F57B10.9	3e-06	F57B10.9 (F57B10.9)	FBpp0300977	7e-11	spartin	ENSP00000347314	4e-09	spastic paraplegia 20 (Troyer syndrome)	ENSMUSP00000103605	9e-22	spastic paraplegia 20, spartin (Troyer syndrome) homolog (human)	SPG20_BOVIN	1e-10	Spartin [Bos taurus]
SMED30009284	-0.282449	-0.945411	-0.747155	-0.976976	-1.48232	C37H5.8	0	HSP-6 (hsp-6)	FBpp0308990	0	Heat shock protein cognate 5	ENSP00000297185	0	heat shock 70kDa protein 9 (mortalin)	ENSMUSP00000025217	0	heat shock protein 9	HSP7F_CAEEL	0	Heat shock 70 kDa protein F, mitochondrial
SMED30022841	-0.981264	-1.92215	0.515977	0.999025	-1.25351	NA	NA	NA	NA	NA	NA	ENSP00000479396	6e-35	chromosome 17 open reading frame 98	ENSMUSP00000103202	2e-33	RIKEN cDNA 1700001P01 gene	CQ098_HUMAN	3e-34	Uncharacterized protein C17orf98 [Homo sapiens]
SMED30033892	-0.569566	-0.995177	-0.610076	-0.822846	-0.821502	NA	NA	NA	NA	NA	NA	NA	NA	NA	NA	NA	NA	NA	NA	NA
SMED30031307	0.481707	-0.210966	-0.814355	-1.24619	-1.2532	NA	NA	NA	NA	NA	NA	NA	NA	NA	NA	NA	NA	NA	NA	NA
SMED30014803	-0.926208	-1.62407	-0.315423	-0.549645	-0.87692	B0019.1	2e-05	AMX-2 (amx-2)	NA	NA	NA	ENSP00000367309	1e-47	monoamine oxidase B	ENSMUSP00000040550	4e-46	monoamine oxidase B	AOFA_DICDI	1e-47	Probable flavin-containing monoamine oxidase A [Dictyostelium discoideum]
SMED30035609	-1.32545	-1.81419	-0.144907	-0.807954	-0.47864	T03E6.7a	4e-103	CPL-1, isoform a.	FBpp0086718	4e-113	Cysteine proteinase-1	ENSP00000445052	1e-116	cathepsin V	ENSMUSP00000021933	1e-109	cathepsin L	CYSP2_HOMAM	2e-119	Digestive cysteine proteinase 2
SMED30005635	-0.902946	-1.69942	0.10636	-0.753497	-1.0092	F08F3.7	6e-40	CYP-14A5 (cyp-14A5)	FBpp0074381	3e-39	Cytochrome P450-18a1	ENSP00000285979	5e-48	cytochrome P450, family 2, subfamily C, polypeptide 18	ENSMUSP00000003100	7e-54	cytochrome P450, family 2, subfamily f, polypeptide 2	CP2F2_RAT	4e-53	Cytochrome P450 2F2
SMED30010947	-1.2467	-1.31682	0.0609083	-0.441573	-0.377309	NA	NA	NA	NA	NA	NA	NA	NA	NA	NA	NA	NA	NA	NA	NA
SMED30010366	-0.725573	-1.00011	-0.701579	-0.794369	-0.9087	K11G12.5	1e-81	K11G12.5 (K11G12.5)	FBpp0082215	5e-81	Dicarboxylate carrier 1	ENSP00000345580	6e-87	solute carrier family 25 (mitochondrial carrier; dicarboxylate transporter), member 10	ENSMUSP00000026899	1e-84	solute carrier family 25 (mitochondrial carrier, dicarboxylate transporter), member 10	DIC_HUMAN	3e-86	Mitochondrial dicarboxylate carrier
SMED30002098	-0.176437	-0.791913	-0.667064	-1.12175	-1.49249	F01D4.4.3	3e-64	EGL-21 (egl-21)	FBpp0288456	5e-45	silver	ENSP00000359446	1e-61	carboxypeptidase N, polypeptide 1	ENSMUSP00000026210	3e-69	carboxypeptidase N, polypeptide 1	CBPN_BOVIN	4e-69	Carboxypeptidase N catalytic chain
SMED30034506	-0.966811	-1.34965	-0.0989811	-0.530428	-0.887892	C42D8.5a	3e-47	ACN-1, isoform a (acn-1)	FBpp0079297	4e-114	Angiotensin-converting enzyme-related	ENSP00000290863	1e-134	angiotensin I converting enzyme	ENSMUSP00000001964	8e-135	angiotensin I converting enzyme (peptidyl-dipeptidase A) 1	ACE_MESAU	2e-130	Angiotensin-converting enzyme
SMED30032672	-0.797463	-0.824542	-1.06729	-1.00286	-0.486645	W09G10.4a	0	APD-3, isoform a.	FBpp0073673	0	garnet	ENSP00000347416	0	adaptor-related protein complex 3, delta 1 subunit	ENSMUSP00000020420	0	adaptor-related protein complex 3, delta 1 subunit	AP3D1_MOUSE	0	AP-3 complex subunit delta-1
SMED30030383	-0.489714	-1.8489	0.608673	-0.67724	0.990307	Y38F1A.10d	7e-15	MAX-2, isoform b.	FBpp0086196	1e-12	inactivation no afterpotential C	ENSP00000377868	8e-13	serine/threonine protein kinase 26	ENSMUSP00000033444	9e-13	serine/threonine kinase 26	CIPKT_ORYSJ	8e-13	CBL-interacting protein kinase 29
SMED30017359	-0.587733	-0.972021	-0.51915	-1.01516	-1.26664	NA	NA	NA	NA	NA	NA	NA	NA	NA	NA	NA	NA	NA	NA	NA
SMED30027550	1.8045	-0.635803	-0.611764	-1.79569	-0.179584	ZK858.7	1e-14	ZK858.7 (ZK858.7)	FBpp0309858	1e-32	NA	ENSP00000203001	7e-33	tRNA methyltransferase 6	ENSMUSP00000044687	4e-59	tRNA methyltransferase 6	TRM6_MOUSE	3e-58	tRNA (adenine(58)-N(1))-methyltransferase non-catalytic subunit TRM6
SMED30010951	-0.642985	-0.906415	-0.62044	-0.949202	-1.0141	NA	NA	NA	NA	NA	NA	NA	NA	NA	NA	NA	NA	NA	NA	NA
SMED30032172	-1.12021	-2.24055	0.419362	-0.29139	0.123979	C26C6.2	1e-126	GOA-1 (goa-1)	FBpp0076643	1e-134	G protein alpha i subunit	ENSP00000343027	5e-139	guanine nucleotide binding protein (G protein), alpha inhibiting activity polypeptide 1	ENSMUSP00000074259	3e-139	guanine nucleotide binding protein (G protein), alpha inhibiting 1	GNAI_LYMST	2e-144	Guanine nucleotide-binding protein G(i) subunit alpha
SMED30016104	-1.47651	-1.82999	0.0751708	0.721738	-0.785853	T04D3.4a	1e-58	GCY-35, isoform a.	FBpp0085115	5e-45	Guanylyl cyclase beta-subunit at 100B	ENSP00000377418	8e-44	guanylate cyclase 1, soluble, alpha 3	ENSMUSP00000022501	2e-96	guanylate cyclase 1, soluble, beta 2	GCYB2_RAT	2e-95	Guanylate cyclase soluble subunit beta-2
SMED30003172	-0.284522	-0.747839	-0.772139	-1.18552	-1.34292	C37H5.6b	3e-133	C37H5.6, isoform b (C37H5.6)	FBpp0083395	5e-162	Adenylosuccinate Synthetase	ENSP00000355493	1e-162	adenylosuccinate synthase	ENSMUSP00000016105	4e-163	adenylosuccinate synthetase, non muscle	PURA_SCHJA	0	Adenylosuccinate synthetase
SMED30002286	-1.03996	-1.63919	0.49496	-0.411759	-1.14258	NA	NA	NA	NA	NA	NA	ENSP00000380854	2e-109	formimidoyltransferase cyclodeaminase	ENSMUSP00000001183	1e-113	formiminotransferase cyclodeaminase	FTCD_PIG	3e-117	Formimidoyltransferase-cyclodeaminase
SMED30005508	-0.758168	-1.00967	-0.619587	-0.834658	-0.808734	Y76A2B.3	1e-146	ACS-5 (acs-5)	FBpp0291528	1e-162	NA	ENSP00000376796	1e-164	acyl-CoA synthetase long-chain family member 5	ENSMUSP00000046585	1e-168	acyl-CoA synthetase long-chain family member 5	ACSL5_MOUSE	1e-167	Long-chain-fatty-acid--CoA ligase 5
SMED30027025	-1.08349	-1.77434	0.0133544	-0.615886	-0.0503913	NA	NA	NA	FBpp0082786	9e-05	NA	ENSP00000306788	2e-12	ADP-ribosylation factor-like 6 interacting protein 1	ENSMUSP00000032888	8e-14	ADP-ribosylation factor-like 6 interacting protein 1	AR6P1_MOUSE	6e-13	ADP-ribosylation factor-like protein 6-interacting protein 1
SMED30035658	-1.03256	-1.12801	-0.452526	-0.734668	-0.625708	NA	NA	NA	NA	NA	NA	NA	NA	NA	NA	NA	NA	NA	NA	NA
SMED30007143	1.35124	-1.55374	0.00610351	-1.29658	-0.949944	T19A6.2c	7e-115	NGP-1, isoform c.	FBpp0086063	2e-123	Nucleostemin ortholog (H. sapiens) 2	ENSP00000362153	1e-125	guanine nucleotide binding protein-like 2 (nucleolar)	ENSMUSP00000030684	2e-126	guanine nucleotide binding protein-like 2 (nucleolar)	NOG2_MOUSE	1e-125	Nucleolar GTP-binding protein 2 [Mus musculus]
SMED30026889	-0.783454	-1.02342	-0.939776	-1.00344	-0.909208	T23H2.5.2	3e-63	RAB-10 (rab-10)	FBpp0077029	3e-65	Rab10	ENSP00000264710	5e-64	RAB10, member RAS oncogene family	ENSMUSP00000021001	3e-64	RAB10, member RAS oncogene family	RAB10_DIPOM	1e-64	Ras-related protein Rab-10
SMED30010964	-0.946964	-1.22802	-0.563061	-0.891898	-0.83349	C10G11.5c.2	1e-11	PNK-1, isoform a.	FBpp0298380	4e-12	fumble	ENSP00000478189	2e-13	pantothenate kinase 4	ENSMUSP00000030931	6e-09	pantothenate kinase 4	PANK4_HUMAN	8e-13	Pantothenate kinase 4
SMED30033476	-0.965007	-1.57091	-0.394572	-0.850926	-0.62217	NA	NA	NA	FBpp0111489	4e-10	NA	ENSP00000266077	4e-08	SLC2A4 regulator	ENSMUSP00000064422	4e-08	zinc finger protein 395	ZN395_XENLA	2e-07	Zinc finger protein 395 [Xenopus laevis]
SMED30000934	-0.062774	-0.25086	-0.745747	-1.02286	-1.01065	ZK637.1	4e-46	SVOP-1 (svop-1)	FBpp0310004	7e-36	NA	ENSP00000405482	7e-50	SVOP-like	ENSMUSP00000093743	4e-48	SV2 related protein homolog (rat)-like	SVOPL_DANRE	3e-53	Putative transporter SVOPL
SMED30027296	-1.39319	-1.84258	0.279822	-0.218482	-0.00287484	C10G11.5c.2	1e-11	PNK-1, isoform a.	FBpp0077846	9e-10	fumble	ENSP00000478189	2e-12	pantothenate kinase 4	ENSMUSP00000064330	2e-10	pantothenate kinase 4	PANK1_ORYSJ	3e-18	Pantothenate kinase 1
SMED30015244	-1.2191	-1.74452	0.560482	-0.519272	-1.02342	NA	NA	NA	NA	NA	NA	NA	NA	NA	NA	NA	NA	NA	NA	NA
SMED30000967	-1.3909	-2.17601	0.471253	-0.103946	0.621644	NA	NA	NA	FBpp0071470	1e-21	NA	NA	NA	NA	NA	NA	NA	NA	NA	NA
SMED30018460	-1.29563	-2.07943	0.157908	0.208413	0.143008	C01A2.4	4e-38	C01A2.4 (C01A2.4)	FBpp0076869	1e-41	Charged multivesicular body protein 2b	ENSP00000263780	1e-39	charged multivesicular body protein 2B	ENSMUSP00000004965	9e-40	charged multivesicular body protein 2B	CHM2B_CHICK	7e-42	Charged multivesicular body protein 2b
SMED30030799	-1.24838	-1.723	-0.0200044	-0.702963	-0.445956	NA	NA	NA	FBpp0311525	5e-07	NA	NA	NA	NA	NA	NA	NA	NA	NA	NA
SMED30026924	-0.454154	-0.348772	-0.977176	-1.22012	-0.609551	NA	NA	NA	NA	NA	NA	NA	NA	NA	NA	NA	NA	NA	NA	NA
SMED30026098	-1.2917	-1.78724	-0.0458801	-0.741584	-0.479141	Y71G10AR.4	4e-59	Y71G10AR.4 (Y71G10AR.4)	FBpp0073848	6e-40	NA	ENSP00000245312	5e-32	solute carrier family 10 (sodium/bile acid cotransporter), member 2	ENSMUSP00000023835	6e-33	solute carrier family 10, member 2	NTCP2_RABIT	7e-33	Ileal sodium/bile acid cotransporter
SMED30011221	-0.27415	-0.95758	-0.343596	-1.09797	-1.71333	F26D10.3.2	6e-147	HSP-1 (hsp-1)	FBpp0075504	2e-145	Heat shock protein cognate 1	ENSP00000404372	3e-152	heat shock 70kDa protein 8	ENSMUSP00000015800	1e-150	heat shock protein 8	HSP7C_CRIGR	9e-150	Heat shock cognate 71 kDa protein
SMED30034650	-0.776328	-1.24154	-0.479836	-0.853928	-0.696865	NA	NA	NA	NA	NA	NA	NA	NA	NA	NA	NA	NA	NA	NA	NA
SMED30028698	-0.56642	-1.19742	0.0847255	-0.785052	-1.41042	NA	NA	NA	NA	NA	NA	NA	NA	NA	NA	NA	NA	NA	NA	NA
SMED30004606	-1.20076	-1.58153	-0.0820089	-0.772554	-0.490788	Y17D7A.4	3e-61	CYP-33D3 (cyp-33D3)	FBpp0074381	5e-56	Cytochrome P450-18a1	ENSP00000360247	1e-65	cytochrome P450, family 2, subfamily J, polypeptide 2	ENSMUSP00000030303	4e-71	cytochrome P450, family 2, subfamily j, polypeptide 6	CP2J6_MOUSE	3e-70	Cytochrome P450 2J6
SMED30014187	-1.13958	-1.56978	-0.117425	-0.758469	-0.377349	W02D3.4.2	4e-64	W02D3.4 (W02D3.4)	NA	NA	NA	ENSP00000296529	4e-82	transmembrane protein 144	ENSMUSP00000127837	2e-83	transmembrane protein 144	TM144_MOUSE	1e-82	Transmembrane protein 144 [Mus musculus]
SMED30033764	-1.10126	-1.49159	-0.32371	-0.882265	-0.767126	Y43F8C.12	0	MRP-7 (mrp-7)	FBpp0089066	0	Multidrug-Resistance like Protein 1	ENSP00000382342	0	ATP-binding cassette, sub-family C (CFTR/MRP), member 1	ENSMUSP00000097743	0	ATP-binding cassette, sub-family C (CFTR/MRP), member 1	MRP1_MOUSE	0	Multidrug resistance-associated protein 1
SMED30026842	-1.36304	-1.69935	0.295211	-0.287411	-0.355199	Y59A8B.21	4e-24	Y59A8B.21 (Y59A8B.21)	NA	NA	NA	NA	NA	NA	NA	NA	NA	YHJX_ECOLI	1e-07	Uncharacterized MFS-type transporter YhjX [Escherichia coli K-12]
SMED30033568	-1.21205	-1.66203	-0.0519208	-0.607738	-0.571949	W10G6.2b	3e-60	SGK-1, isoform a (sgk-1)	FBpp0082680	3e-41	Akt1	ENSP00000430691	2e-90	serum/glucocorticoid regulated kinase family, member 3	ENSMUSP00000140496	2e-93	serum/glucocorticoid regulated kinase 3	SGK3_RAT	3e-90	Serine/threonine-protein kinase Sgk3
SMED30026171	-1.19908	-2.15729	0.506485	0.259552	0.793123	NA	NA	NA	NA	NA	NA	NA	NA	NA	NA	NA	NA	NA	NA	NA
SMED30001068	-0.883167	-1.29077	-0.453281	-0.903932	-1.04571	ZK822.3b	6e-55	NHX-9, isoform b.	FBpp0289189	2e-62	Na[+]/H[+] hydrogen exchanger 2	ENSP00000263980	3e-58	solute carrier family 9, subfamily A (NHE1, cation proton antiporter 1), member 1	ENSMUSP00000030669	6e-61	solute carrier family 9 (sodium/hydrogen exchanger), member 1	NHEB_ONCMY	3e-63	Na(+)/H(+) exchanger beta
SMED30003163	-0.381114	-1.2333	-0.567405	-1.248	-1.28312	NA	NA	NA	FBpp0087607	5e-123	Updo	ENSP00000246337	2e-136	uroporphyrinogen decarboxylase	ENSMUSP00000030446	5e-138	uroporphyrinogen decarboxylase	DCUP_DANRE	2e-145	Uroporphyrinogen decarboxylase
SMED30021814	-0.487637	-1.14131	-0.385209	-0.777047	-1.2244	NA	NA	NA	NA	NA	NA	NA	NA	NA	NA	NA	NA	NA	NA	NA
SMED30021545	-1.0921	-1.74249	-0.0605276	-0.593996	-0.360999	K08F4.11	2e-27	GST-3 (gst-3)	FBpp0099646	8e-24	Glutathione S transferase S1	ENSP00000295256	4e-29	hematopoietic prostaglandin D synthase	ENSMUSP00000031982	1e-28	hematopoietic prostaglandin D synthase	GST28_SCHMA	1e-37	Glutathione S-transferase class-mu 28 kDa isozyme
SMED30009017	-1.37874	-1.6531	-0.00252989	-0.358853	-0.545505	NA	NA	NA	NA	NA	NA	NA	NA	NA	NA	NA	NA	NA	NA	NA
SMED30031112	-0.845419	-1.40605	-0.399116	-0.923888	-0.909974	ZK546.15	1e-09	TRY-1 (try-1)	FBpp0312168	3e-25	NA	ENSP00000293636	2e-23	chymotrypsin-like elastase family, member 1	ENSMUSP00000099581	4e-24	chymotrypsin-like elastase family, member 3B	CELA1_RAT	3e-26	Chymotrypsin-like elastase family member 1
SMED30010974	-1.42494	-1.94388	0.0332535	-0.395071	0.15957	Y8G1A.2	6e-69	INX-13 (inx-13)	FBpp0111483	6e-15	shaking B	NA	NA	NA	NA	NA	NA	UNC9_CAEEL	2e-65	Innexin unc-9
SMED30027319	-0.723225	-1.72704	-0.433213	-1.15325	-0.820398	K04F10.1	7e-09	K04F10.1 (K04F10.1)	FBpp0289092	5e-09	Ataxin 1	ENSP00000416360	2e-14	ataxin 1	ENSMUSP00000129890	3e-15	ataxin 1	ATX1_MOUSE	2e-14	Ataxin-1
SMED30030422	-0.296194	-0.528741	-0.827251	-1.11647	-1.43669	NA	NA	NA	NA	NA	NA	NA	NA	NA	NA	NA	NA	NA	NA	NA
SMED30024516	-0.511389	-1.27184	-0.547403	-1.06667	-1.45224	K01C8.7a	8e-67	K01C8.7, isoform b (K01C8.7)	FBpp0291674	3e-109	NA	ENSP00000297578	8e-104	solute carrier family 25 (mitochondrial folate carrier), member 32	ENSMUSP00000022908	2e-104	solute carrier family 25, member 32	MFTC_MACFA	6e-104	Mitochondrial folate transporter/carrier
SMED30007674	1.11486	-1.08036	-0.541544	-1.24304	-1.82193	NA	NA	NA	FBpp0085137	4e-12	NA	ENSP00000357215	2e-12	G patch domain containing 4	ENSMUSP00000141477	5e-12	G patch domain containing 4	GPTC4_RAT	4e-12	G patch domain-containing protein 4 [Rattus norvegicus]
[truncated: 175 more rows]

## Sheet: GO_587_enrichment
go_id	Term	Ontol	pval	BH.correction	Num_Genes	Genes
[truncated: 453 more rows]
