# Supplementary material for: Egr-5 is a post-mitotic regulator of planarian epidermal differentiation
Source: eLife. 2015 Oct 12;4:e10501. doi: 10.7554/eLife.10501 (PMC4716842; doi:10.7554/eLife.10501)
Supplement: Supplementary file 2. — Genes were classified as up-regulated if the adjusted p value <1e-13 and log2 fold change >1. DOI: http://dx.doi.org/10.7554/eLife.10501.027 [file elife-10501-supp2.xls]

## Sheet: chd4_p53_up-regulated genes
id	chd4_d15	chd4.15_p.adj	p53_d18	p53.18_p.adj	flags	Top Swiss-prot ID	E-value	Swiss-prot description
SMED30000059	1.33835	3.28628e-18	1.39134	1.1972e-15	1
SMED30000143	1.21971	1.70939e-33	0.451408	0.000223224	3
SMED30000146	1.5847	2.53541e-47	1.11678	2.90459e-16	1	GLIS3_HUMAN	1e-71	Zinc finger protein GLIS3
SMED30000214	3.17276	7.00114e-14	0.900605	0.291917	3
SMED30000315	1.96033	2.92651e-15	0.851281	0.0263349	3
SMED30000350	-0.150216	0.233402	1.09756	4.01397e-26	2
SMED30000412	4.54707	4.3707e-22	5.49792	2.02668e-28	1	SYT7_HUMAN	3e-12	Synaptotagmin-7
SMED30000427	3.88263	2.30569e-40	-0.251255	0.802157	3
SMED30000459	1.02884	2.73761e-23	-0.0187495	0.927218	3	DNM1L_DANRE	1e-134	Dynamin-1-like protein [Danio rerio]
SMED30000513	1.13929	2.35306e-18	-0.254113	0.205315	3
SMED30000553	1.12472	3.42589e-23	0.399908	0.0085111	3	PTK7_HUMAN	1e-34	Inactive tyrosine-protein kinase 7
SMED30000564	0.658502	2.81736e-10	1.25508	1.86548e-30	2
SMED30000707	0.579608	8.96015e-21	1.23246	5.36745e-80	2	NHEB_ONCMY	3e-62	Na(+)/H(+) exchanger beta
SMED30000978	0.383542	0.0266999	1.23344	8.88211e-17	2
SMED30001012	1.44838	5.48777e-31	0.248956	0.2795	3
SMED30001027	1.81022	8.34338e-90	0.625681	4.4303e-09	3	CATL_SARPE	3e-83	Cathepsin L
SMED30001103	0.712997	1.09518e-12	1.06463	2.18957e-22	2
SMED30001134	1.09166	5.40623e-18	-1.25823	1.29068e-09	3
SMED30001146	1.6864	3.0342e-34	1.21615	5.48952e-13	3	CALCR_CAVPO	2e-22	Calcitonin receptor
SMED30001212	1.0818	3.12526e-37	-0.192231	0.14366	3	TBA_NOTVI	0	Tubulin alpha chain [Notophthalmus viridescens]
SMED30001402	0.340897	0.00673908	1.35619	3.0453e-33	2	PLSL_MOUSE	2e-71	Plastin-2
SMED30001480	1.88725	1.46003e-82	0.895989	7.45776e-16	3	ULK1_MOUSE	1e-35	Serine/threonine-protein kinase ULK1
SMED30001636	1.10597	9.98898e-100	0.916522	7.89073e-54	3	MYLIP_HUMAN	6e-66	E3 ubiquitin-protein ligase MYLIP
SMED30001715	1.14591	5.32565e-27	1.0236	1.14799e-17	1
SMED30001780	1.68573	2.37766e-33	0.287043	0.174231	3
SMED30001802	1.33392	6.5292e-95	0.636259	4.97974e-15	3			Smed-jun-1
SMED30001808	0.104943	0.240391	1.23681	1.37413e-65	2	AT2B3_HUMAN	0	Plasma membrane calcium-transporting ATPase 3
SMED30001897	1.06032	7.17061e-29	-0.121162	0.495056	3	TBA_NOTVI	0	Tubulin alpha chain [Notophthalmus viridescens]
SMED30002125	2.17642	3.00767e-15	0.103754	0.870746	3
SMED30002262	1.0022	2.79712e-28	0.604006	5.95956e-09	3	HSP7C_HUMAN	0	Heat shock cognate 71 kDa protein
SMED30002285	1.56213	6.7702e-73	0.995004	4.34617e-25	3
SMED30002366	0.693057	8.86173e-24	1.37127	2.95641e-77	2	KAPR_HYPAT	2e-09	cAMP-dependent protein kinase regulatory subunit
SMED30002422	0.579893	5.87923e-08	1.11968	5.56482e-24	2
SMED30002437	0.385558	0.00373513	2.24375	1.98045e-74	2
SMED30002458	1.28235	3.52847e-70	0.521824	2.05251e-09	3	FRIS_LYMST	3e-67	Soma ferritin [Lymnaea stagnalis]
SMED30002503	1.36114	2.13447e-53	0.226601	0.0725594	3
SMED30002575	-2.55817	5.93974e-21	1.89566	1.50943e-22	2
SMED30002663	1.6354	4.0428e-53	1.46187	5.18817e-34	1	TRAF3_MOUSE	1e-49	TNF receptor-associated factor 3
SMED30002751	-0.954258	0.00120108	1.82138	6.434e-21	2
SMED30002753	2.68311	2.92338e-93	1.58565	5.97935e-29	1
SMED30002813	3.48054	2.81861e-48	1.08053	0.00140344	3
SMED30002847	0.727292	6.22348e-07	1.74392	3.08882e-31	2	UN105_CAEEL	4e-06	Degenerin-like protein unc-105
SMED30002911	8.54684	3.06519e-143	3.95301	6.44913e-09	3	LICH_HUMAN	4e-106	Lysosomal acid lipase/cholesteryl ester hydrolase
SMED30002956	3.60642	8.62296e-60	0.0729384	0.896732	3
SMED30003001	1.34591	1.6931e-34	0.611895	5.10734e-06	3	STA5A_MOUSE	6e-13	Signal transducer and activator of transcription 5A
SMED30003013	2.4458	2.62476e-90	2.94442	1.11912e-108	1	CY250_MOUSE	1e-47	Cytochrome P450 2C50
SMED30003035	1.40562	4.68825e-29	1.99013	5.29983e-51	1	TRAF6_XENTR	0.0001	TNF receptor-associated factor 6
SMED30003097	3.71579	3.61239e-30	1.80059	0.000280979	3
SMED30003164	1.99894	5.50338e-18	0.34975	0.42405	3
SMED30003180	1.77827	1.88003e-50	0.421434	0.0253506	3
SMED30003202	5.33073	4.51071e-15	-2.71939	0.301989	3	IF4A_CHAGB	0	ATP-dependent RNA helicase eIF4A
SMED30003270	1.69814	3.35474e-131	0.894308	5.84714e-29	3	ALS_HUMAN	2e-15	Insulin-like growth factor-binding protein complex acid labile subunit
SMED30003372	-0.00234179	0.988184	1.93422	2.36721e-75	2
SMED30003448	-1.94205	1.13849e-77	1.19155	9.95369e-29	2	GNMT_MOUSE	8e-115	Glycine N-methyltransferase [Mus musculus]
SMED30003454	1.53547	1.00117e-60	0.737401	2.98944e-10	3
SMED30003676	2.53726	8.78583e-17	4.65399	1.55773e-42	1	CL43_BOVIN	1e-10	Collectin-43
SMED30003677	1.13966	5.48107e-67	1.57923	1.29402e-106	1	YFI3_ECOLX	5e-19	Uncharacterized endonuclease
SMED30003738	4.71939	5.22081e-73	6.28445	1.67414e-104	1
SMED30003881	0.41258	0.000113835	1.69686	1.33037e-63	2	MTP5_ORYSJ	9e-59	Metal tolerance protein 5
SMED30003909	2.29334	4.32697e-78	0.827972	1.05921e-09	3
SMED30003923	0.0303172	0.840297	1.85093	5.11728e-82	2
SMED30003939	0.872856	9.55768e-25	1.5725	1.41643e-65	2
SMED30003962	1.29773	4.94696e-53	0.674692	1.93978e-12	3	GRN_HUMAN	4e-36	Granulins
SMED30003976	0.129717	0.455934	1.1451	3.76908e-19	2
SMED30004062	1.10789	1.67929e-22	0.316723	0.0482825	3	ELIC_DICCH	5e-12	Cys-loop ligand-gated ion channel
SMED30004520	-0.448869	1.775e-05	1.00089	6.87188e-24	2
SMED30004839	2.10394	8.65983e-15	0.927806	0.0177274	3	ICP0_SUHVF	2e-07	E3 ubiquitin-protein ligase ICP0
SMED30004964	1.96827	4.65855e-06	4.23136	4.15408e-37	2
SMED30005003	2.78103	4.90978e-23	0.514281	0.412303	3	CACB2_RAT	7e-16	Voltage-dependent L-type calcium channel subunit beta-2
SMED30005208	-0.092712	0.679094	1.98776	4.1449e-53	2
SMED30005237	0.852525	1.06192e-25	1.07027	5.39651e-33	2	ZN577_HUMAN	1e-16	Zinc finger protein 577 [Homo sapiens]
SMED30005274	1.19464	6.60241e-119	0.770124	1.31802e-39	3	TPP2_MOUSE	0	Tripeptidyl-peptidase 2
SMED30005488	0.933454	4.43654e-24	1.07995	1.68988e-23	2
SMED30005521	0.709689	1.00226e-06	1.42386	3.65913e-22	2	TEGU_SCHMA	1e-14	Tegument antigen
SMED30005571	0.178269	0.0640732	1.55071	3.95093e-70	2	P5CS_PONAB	0	Delta-1-pyrroline-5-carboxylate synthase
SMED30005609	1.01985	7.44932e-23	0.702849	4.97962e-08	3
SMED30005617	1.1477	4.00208e-68	0.500423	5.621e-11	3	DNM1L_DANRE	7e-68	Dynamin-1-like protein [Danio rerio]
SMED30005648	2.68443	1.16739e-139	0.740128	5.5741e-09	3
SMED30005658	2.09515	3.29407e-49	0.178073	0.548345	3
SMED30005670	-0.72528	2.57393e-10	1.10687	2.84778e-19	2
SMED30005747	1.9171	2.64318e-39	0.460828	0.0114405	3
SMED30005776	1.23839	5.30709e-21	0.972105	6.30593e-10	3
SMED30005794	1.17007	9.87642e-94	0.411986	2.3221e-09	3
SMED30005837	0.439216	0.000346395	1.00435	2.61136e-15	2
SMED30005855	1.86996	3.93217e-12	2.31013	1.81181e-15	2	GRN_HUMAN	5e-13	Granulins
SMED30005958	1.72494	7.40109e-45	1.46738	1.85851e-25	1
SMED30006077	1.45371	9.67804e-14	1.00071	0.000306766	3	AR_BOMMO	2e-12	Allatostatin-A receptor
SMED30006092	1.27475	2.68577e-35	0.495226	0.000369342	3
SMED30006125	1.01805	2.60567e-37	-0.779727	8.11103e-11	3	ZN142_HUMAN	3e-05	Zinc finger protein 142
SMED30006161	-0.117335	0.412829	1.79442	2.20654e-64	2	NCKX5_MOUSE	4e-57	Sodium/potassium/calcium exchanger 5
SMED30006268	1.07671	6.21589e-50	0.239118	0.0147418	3	ACE_HUMAN	9e-99	Angiotensin-converting enzyme
SMED30006293	2.02109	8.50565e-36	0.102498	0.748153	3
SMED30006403	-0.546466	0.014493	1.71218	6.91436e-23	2	GLRA3_RAT	6e-53	Glycine receptor subunit alpha-3
SMED30006669	-0.0417291	0.830249	1.0228	1.00082e-17	2	WHRN_HUMAN	1e-13	Whirlin
SMED30006796	0.56697	0.000440926	1.39471	6.24299e-17	2	TYRO_CHICK	5e-41	Tyrosinase
SMED30006807	5.33469	1.93811e-84	-1.92553	0.205702	3	AFC2_ARATH	1e-52	Serine/threonine-protein kinase AFC2 [Arabidopsis thaliana]
SMED30006821	1.48817	3.84619e-47	0.781411	1.98266e-11	3
SMED30006949	-0.639902	1.69766e-12	1.00641	2.7993e-25	2
SMED30007022	0.966416	4.24188e-19	1.07436	2.93086e-17	2	NPSR1_HUMAN	0.0008	Neuropeptide S receptor
SMED30007059	-0.348359	0.0109432	1.33988	7.55839e-30	2	DYR_PIG	1e-29	Dihydrofolate reductase [Sus scrofa]
SMED30007277	-1.19326	4.35681e-47	1.17687	2.59602e-46	2	T23O_DROAN	3e-117	Tryptophan 2,3-dioxygenase
SMED30007374	2.27771	3.09113e-24	0.0147112	0.985637	3
SMED30007443	1.59915	1.33486e-16	2.67208	5.52406e-39	1
SMED30007461	1.33387	6.1371e-21	2.73017	8.25432e-75	1	RL40_DROME	3e-15	Ubiquitin-60S ribosomal protein L40
SMED30007463	1.42665	6.1377e-30	1.15761	2.15213e-16	1	ASNS_CRIGR	7e-110	Asparagine synthetase [glutamine-hydrolyzing]
SMED30007489	0.024071	0.899096	1.27119	1.50622e-27	2	KLK13_HUMAN	6e-25	Kallikrein-13
SMED30007501	5.42514	5.16904e-37	7.9468	4.43006e-59	1	MRC1_HUMAN	6e-15	Macrophage mannose receptor 1
SMED30007511	1.29722	2.10368e-17	1.75502	1.26939e-25	1	HEM3_HUMAN	1e-64	Porphobilinogen deaminase
SMED30007604	-0.509798	5.31012e-12	1.1541	8.54014e-53	2
SMED30007618	0.864355	8.21622e-44	1.12312	5.50119e-61	2	SIK2_MOUSE	4e-106	Serine/threonine-protein kinase SIK2
SMED30007637	0.598481	3.58085e-05	1.31636	3.30946e-18	2
SMED30007645	1.84944	3.53863e-33	1.20508	4.98932e-11	3	TIGD2_MOUSE	2e-05	Tigger transposable element-derived protein 2 [Mus musculus]
SMED30007715	0.819846	7.80751e-23	1.26845	5.85183e-41	2
SMED30007916	2.25248	2.43862e-47	-0.200384	0.507253	3
SMED30008023	1.83839	6.3006e-39	2.34065	1.06746e-56	1	ZNT10_MOUSE	4e-06	Zinc transporter 10
SMED30008073	0.763571	5.90805e-26	1.5747	1.68304e-89	2	MRC1_HUMAN	1e-23	Macrophage mannose receptor 1
SMED30008091	1.97544	5.70349e-172	0.450789	7.81587e-08	3	SEPA_DICDI	2e-32	Serine/threonine-protein kinase sepA
SMED30008126	-0.686341	5.07809e-08	1.64107	4.02232e-40	2	NPL_MOUSE	8e-23	N-acetylneuraminate lyase
SMED30008130	4.54376	7.99189e-14	0.512158	0.852242	3	TBB_PARLI	0	Tubulin beta chain
SMED30008159	2.10928	5.94237e-19	1.71701	2.2389e-10	3
SMED30008266	1.13999	7.13085e-67	0.58143	8.36509e-14	3	GTR1_BOVIN	2e-115	Solute carrier family 2, facilitated glucose transporter member 1
SMED30008271	2.35557	1.03079e-95	0.034173	0.895971	3
SMED30008388	-1.07293	2.01056e-17	1.48554	5.25334e-42	2	EAA2_MOUSE	1e-100	Excitatory amino acid transporter 2
SMED30008464	4.14939	3.12556e-37	0.530128	0.55132	3	G3P_SCHMA	0	Glyceraldehyde-3-phosphate dehydrogenase
SMED30008474	1.2717	8.50335e-25	0.449372	0.0106953	3	DYH10_HUMAN	0	Dynein heavy chain 10, axonemal
SMED30008508	1.26362	2.18792e-111	0.563132	2.72867e-18	3	XIRP2_MOUSE	5e-19	Xin actin-binding repeat-containing protein 2
SMED30008778	1.29558	2.30954e-15	0.668542	0.0017598	3
SMED30008787	1.84455	5.77413e-49	-0.614421	0.00689297	3	UNC9_CAEEL	7e-51	Innexin unc-9
SMED30008898	2.33349	6.09541e-79	-0.725708	0.00610603	3	MARF_DROME	4e-30	Transmembrane GTPase Marf
SMED30008911	1.47348	3.19545e-104	0.771016	7.72415e-24	3	FSCN1_HUMAN	3e-110	Fascin
SMED30008930	2.33813	1.05833e-21	0.202415	0.731154	3	EF2_CAEEL	0	Elongation factor 2
SMED30008986	-0.970977	2.03623e-16	1.32303	6.2551e-28	2
SMED30009112	1.22239	1.01102e-64	1.25755	7.20639e-57	1	PLXD1_HUMAN	3e-53	Plexin-D1
SMED30009191	1.02193	3.92028e-14	0.433954	0.0168046	3
SMED30009224	1.64726	9.4692e-14	2.95445	1.38733e-20	1	EGR1_DANRE	7e-24	Smed-egr-3
SMED30009429	2.07311	3.06698e-63	1.56643	1.36847e-26	1	INHBE_RAT	2e-11	Inhibin beta E chain
SMED30009611	-0.101357	0.517153	1.56239	1.23797e-41	2	APMAP_DANRE	3e-42	Adipocyte plasma membrane-associated protein [Danio rerio]
SMED30009645	3.91767	1.11238e-41	0.149234	0.854411	3
SMED30009662	1.05153	1.68906e-21	1.36962	1.01056e-29	1
SMED30009699	2.08572	9.36613e-53	0.471966	0.0127624	3
SMED30009700	1.13648	4.85615e-29	0.514522	0.000106797	3	DLRB2_BOVIN	1e-30	Dynein light chain roadblock-type 2
SMED30009791	1.21998	1.48783e-91	0.445865	4.75172e-10	3	ATP7B_MOUSE	0	Copper-transporting ATPase 2
SMED30009861	0.434209	0.0126593	2.38413	7.95788e-61	2	S26A2_HORSE	1e-98	Sulfate transporter
SMED30009873	1.67282	3.29591e-66	1.02459	3.40759e-21	1	UBIQP_XENLA	4e-08	Polyubiquitin
SMED30009959	3.94705	1.22369e-14	-0.310156	0.875647	3	PASK_MOUSE	4e-66	PAS domain-containing serine/threonine-protein kinase
SMED30009965	2.9315	9.44993e-28	1.16784	0.00148562	3
SMED30010044	1.04112	4.76892e-53	0.660434	9.43587e-17	3	RHG07_BOVIN	6e-77	Rho GTPase-activating protein 7
SMED30010123	0.282769	7.55432e-07	1.25785	6.28763e-103	2	AT1B1_CAEEL	7e-32	Sodium/potassium-transporting ATPase subunit beta-1
SMED30010205	1.00852	2.54067e-20	0.731605	5.62959e-09	3	PIM2_DANRE	3e-53	Serine/threonine-protein kinase pim-2
SMED30010326	1.073	6.90249e-32	0.912532	3.33128e-19	3	TSN1_MOUSE	2e-09	Tetraspanin-1
SMED30010444	1.21222	1.81882e-32	-0.351554	0.0242022	3	CASP3_CANFA	1e-41	Caspase-3
SMED30010459	8.47299	8.084e-17	0	1	3	CATB_MACFA	7e-120	Cathepsin B
SMED30010476	4.17621	1.8848e-29	1.38387	0.000956429	3	CP2J6_MOUSE	1e-35	Cytochrome P450 2J6
SMED30010507	1.48432	6.3191e-24	0.575918	0.00298634	3	CATA_BOVIN	0	Catalase [Bos taurus]
SMED30010619	0.321411	0.000168117	1.48384	1.74355e-73	2	KCNQ1_XENLA	1e-129	Potassium voltage-gated channel subfamily KQT member 1
SMED30010647	5.65555	1.42912e-45	-0.790833	0.378259	3
SMED30010721	1.3653	3.75813e-72	0.309684	0.00408028	3	KAD2_XENLA	1e-90	Adenylate kinase 2, mitochondrial
SMED30011012	0.742418	5.83257e-23	1.58122	4.89173e-84	2	MRC1_HUMAN	3e-20	Macrophage mannose receptor 1
SMED30011034	-0.541325	0.146912	3.23892	2.62105e-22	2
SMED30011050	1.23383	4.42741e-21	-0.184992	0.466142	3
SMED30011135	0.110685	0.316275	1.88817	5.60497e-101	2	OXLT_OXAFO	2e-10	Oxalate:formate antiporter
SMED30011148	3.55634	3.22942e-35	1.19365	0.00837316	3
SMED30011209	0.191186	0.0440495	1.42655	5.85169e-66	2	S35B2_MOUSE	2e-106	Adenosine 3'-phospho 5'-phosphosulfate transporter 1
SMED30011264	-0.208664	0.102016	1.48225	1.38286e-40	2	MPEG1_HUMAN	4e-97	Macrophage-expressed gene 1 protein
SMED30011307	2.21812	5.63714e-16	0.111801	0.822819	3	MYLK_BOVIN	3e-05	Myosin light chain kinase, smooth muscle
SMED30011345	1.98676	1.2637e-19	-0.0580801	0.914957	3	DYL2_RAT	3e-53	Dynein light chain 2, cytoplasmic
SMED30011396	1.37528	4.18949e-133	0.512737	9.3361e-16	3
SMED30011412	0.815756	1.14768e-32	1.3145	1.51055e-69	2	RL37_SCHMA	2e-35	60S ribosomal protein L37 [Schistosoma mansoni]
SMED30011413	4.99211	0	-0.413614	0.359455	3	H2A2C_HUMAN	8e-41	Histone H2A type 2-C
SMED30011448	5.64642	1.39702e-83	-1.5589	0.200437	3
SMED30011726	1.19148	3.28844e-16	0.845787	7.47013e-07	3	GLB1_ARTSX	1e-08	Extracellular globin-E1, partial [Artemia sp.]
SMED30011775	2.55121	1.22868e-37	-1.32965	0.00277665	3	H2BL1_PSAMI	7e-53	Late histone H2B.2.1 [Psammechinus miliaris]
SMED30011831	1.12891	7.71016e-44	0.540257	4.88193e-08	3
SMED30011851	2.26272	7.6825e-28	1.04823	7.21277e-05	3
SMED30011858	0.593066	0.000198269	1.73335	2.09206e-27	2	VA5_VESVI	5e-17	Venom allergen 5
SMED30011869	1.31689	3.92827e-33	0.80055	7.60495e-10	3
SMED30011909	2.09391	8.12993e-56	0.82723	1.7311e-06	3	M2K10_ARATH	0.0002	Mitogen-activated protein kinase kinase 10
SMED30011914	2.16057	1.52563e-15	-0.127184	0.89467	3	BEST1_MOUSE	4e-80	Bestrophin-1
SMED30012165	2.74315	6.97619e-22	-1.37401	0.0625215	3	EF1A1_RAT	0	Elongation factor 1-alpha 1
SMED30012192	1.59099	8.60996e-63	0.974865	1.20101e-17	3	MPPD1_MOUSE	1e-15	Metallophosphoesterase domain-containing protein 1 [Mus musculus]
SMED30012193	0.452162	1.18495e-07	1.65532	2.61702e-81	2	OAT_DROAN	6e-86	Ornithine aminotransferase, mitochondrial
SMED30012194	2.64826	1.53225e-32	0.905862	0.15245	3
SMED30012228	-1.92578	6.47257e-09	1.61473	7.0207e-18	2
SMED30012288	1.14901	3.70719e-41	0.231874	0.0479167	3	POL_MLVCB	3e-14	Gag-Pol polyprotein
SMED30012309	2.2048	3.6326e-29	1.59179	7.49711e-14	1
SMED30012493	0.416313	0.0181337	1.24972	6.51618e-15	2	FIMB_DICDI	7e-42	Fimbrin [Dictyostelium discoideum]
SMED30012612	1.06762	4.26299e-22	1.1745	3.69042e-18	1
SMED30012615	1.02038	2.03845e-30	0.427813	6.8875e-05	3
SMED30012684	2.51819	4.96379e-111	1.2171	2.94097e-22	1
SMED30012694	1.8311	4.3628e-29	1.89982	2.35331e-26	1	KLF11_MOUSE	2e-34	Krueppel-like factor 11
SMED30012798	1.06843	1.74381e-33	1.04886	1.06139e-25	1	OTOP1_RAT	4e-13	Otopetrin-1 [Rattus norvegicus]
SMED30012850	1.52805	1.4622e-117	0.543009	3.58819e-12	3	SPON1_RAT	6e-61	Spondin-1
SMED30012951	2.54911	1.81418e-113	0.461893	0.0142864	3
SMED30012973	1.89722	1.28697e-99	0.96227	6.20826e-20	3
SMED30013183	1.15457	5.58965e-39	0.71467	5.0782e-12	3	RTP3_HUMAN	4e-05	Receptor-transporting protein 3
SMED30013255	2.18244	1.05054e-17	0.345676	0.562948	3	FRIMS_TREBE	6e-11	Ferritin, spleen middle subunit
SMED30013388	2.95074	1.41486e-17	0.64894	0.267409	3
SMED30013498	1.0738	4.02427e-16	0.754636	3.15003e-06	3	WLI2A_ARATH	3e-14	LIM domain-containing protein WLIM2a
SMED30013580	5.20435	8.48394e-23	5.96812	1.39739e-28	1
SMED30013673	-0.00357152	0.993962	3.04852	9.15703e-26	2
SMED30013675	1.1971	2.81595e-85	0.995841	3.2135e-48	3	PLXB2_MOUSE	1e-47	Plexin-B2
SMED30013692	1.04682	3.35518e-28	0.552249	1.25595e-06	3	P40_SCHMA	2e-06	Major egg antigen
SMED30013747	1.81198	1.67655e-20	1.26432	4.29528e-08	3
SMED30013789	-0.291827	0.217634	1.35142	2.87372e-16	2
SMED30013807	2.01147	9.68616e-52	1.17225	4.80992e-12	3	DDC_RAT	3e-145	Aromatic-L-amino-acid decarboxylase
SMED30013808	1.46037	4.05524e-165	0.896439	3.27661e-49	3			Smed-fos-1
SMED30014006	-0.305062	0.156935	1.92234	2.96816e-32	2
SMED30014079	1.11288	3.68095e-55	0.449774	6.68657e-08	3
SMED30014095	1.47946	1.16795e-98	0.822061	2.34519e-24	3	NUC_SHIFL	1e-17	Micrococcal nuclease
SMED30014278	1.41918	7.53708e-51	0.608849	3.92846e-07	3	FGD4_HUMAN	3e-10	FYVE, RhoGEF and PH domain-containing protein 4
SMED30014414	3.47785	2.5834e-14	-1.1054	0.262288	3	ABC8A_MOUSE	2e-20	ATP-binding cassette sub-family A member 8-A [Mus musculus]
SMED30014448	1.00183	2.7917e-51	0.669095	3.22598e-18	3	PLXB2_HUMAN	9e-34	Plexin-B2
SMED30014469	1.39496	5.41424e-29	0.270415	0.125059	3
SMED30014581	3.68177	3.15644e-41	-2.03111	0.0562695	3	GLNA2_DROME	2e-164	Glutamine synthetase 2 cytoplasmic
SMED30014608	1.46142	6.25289e-38	0.703628	1.90061e-07	3	TCAF3_MOUSE	4e-33	TRPM8 channel-associated factor 3
SMED30014642	0.213816	0.448766	2.67204	9.79577e-39	2
SMED30014686	1.14921	5.21989e-32	1.52247	3.77461e-46	1	CDT1_HUMAN	5e-08	DNA replication factor Cdt1
SMED30015024	0.757399	1.33708e-10	1.02318	1.07453e-17	2
SMED30015038	1.06646	2.53258e-21	0.445571	0.00196674	3	SDHF4_HUMAN	8e-15	Succinate dehydrogenase assembly factor 4, mitochondrial
SMED30015120	1.58486	3.98818e-15	3.49714	7.34299e-57	1	KCP_HALAI	6e-26	BPTI/Kunitz domain-containing protein, partial [Haliotis asinina]
SMED30015243	1.40548	1.89144e-22	0.0477031	0.862699	3	YODA_ARATH	1e-37	Mitogen-activated protein kinase kinase kinase YODA
SMED30015313	2.371	6.83955e-14	-3.33321	6.44645e-07	3	PI15A_DANRE	3e-25	Peptidase inhibitor 15-A
SMED30015406	1.05385	3.18904e-74	0.937906	5.0132e-48	3	TRAF1_MOUSE	2e-10	TNF receptor-associated factor 1 [Mus musculus]
SMED30015407	0.612266	6.38418e-06	1.24701	7.00788e-19	2	DIAP1_HUMAN	1e-84	Protein diaphanous homolog 1
SMED30015498	1.38957	1.70627e-21	1.9032	2.21184e-33	1
SMED30015512	1.00473	1.05587e-31	0.947812	7.67359e-22	3	VA51_VESCR	6e-33	Venom allergen 5.01
SMED30015538	1.79415	1.3227e-71	0.493372	0.000270565	3
SMED30015694	1.00487	1.79046e-32	0.406157	0.000131792	3	H2A1_XENLA	4e-48	Histone H2A type 1 [Xenopus laevis]
SMED30015707	1.10373	1.20539e-23	0.29537	0.0829523	3	ACM5_PANTR	2e-75	Muscarinic acetylcholine receptor M5 [Pan troglodytes]
SMED30015727	1.4035	4.32962e-55	0.785973	1.41259e-13	3
SMED30015762	1.34952	3.6183e-15	0.635257	0.00533465	3
SMED30015785	1.53431	1.27456e-34	-1.43827	9.65634e-10	3	GLD2_CAEEL	8e-62	Poly(A) RNA polymerase gld-2
SMED30015992	1.39874	5.07678e-64	0.735899	2.89842e-13	3
SMED30016027	1.20477	6.43091e-42	0.595648	6.47762e-08	3
SMED30016094	1.47371	2.01484e-24	0.538704	0.00319645	3
SMED30016139	0.716904	0.00645089	4.22683	9.62958e-62	2	VKT2_ANESU	6e-16	Kunitz-type protease inhibitor kalicludine-2
SMED30016166	0.481118	4.0546e-06	1.52885	1.69683e-46	2
SMED30016305	2.20616	1.00785e-18	1.71309	1.00385e-08	3
SMED30016328	0.369523	0.000862784	1.23921	1.62755e-28	2	CUBN_RAT	0	Cubilin
SMED30016546	1.99438	3.66022e-78	0.521975	9.6985e-05	3
SMED30016560	0.128698	0.136219	1.1348	1.49651e-51	2	CAN5_HUMAN	5e-107	Calpain-5
SMED30016927	1.11784	7.31535e-17	1.07865	2.54766e-13	3
SMED30016933	1.23178	4.22188e-15	0.620325	0.00167668	3
SMED30016975	1.39949	1.27275e-32	0.457334	0.00322615	3	H2A_DROME	7e-45	Histone H2A [Drosophila melanogaster]
SMED30017004	0.590059	5.83365e-07	1.47447	1.01936e-32	2	VKT3_VIPAA	2e-15	Kunitz-type serine protease inhibitor 3
SMED30017065	2.71317	3.07774e-28	3.98209	7.92052e-49	1	CP237_MOUSE	9e-40	Cytochrome P450 2C37
SMED30017158	1.60926	8.30239e-22	0.974035	7.58703e-06	3	DYH10_HUMAN	0	Dynein heavy chain 10, axonemal
SMED30017313	1.86194	1.72387e-39	0.762488	0.000130316	3
SMED30017363	0.192706	0.127019	1.1097	7.46441e-23	2
SMED30017364	2.57987	1.69015e-61	3.41161	4.07144e-92	1
SMED30017389	-0.339541	0.000276293	1.03852	4.59773e-30	2	S4A11_HUMAN	2e-141	Sodium bicarbonate transporter-like protein 11
SMED30017639	0.0154635	0.975226	3.55742	9.93023e-28	2
SMED30017647	1.01687	1.89287e-39	0.768405	3.76258e-18	3
SMED30017650	1.86637	5.40633e-42	0.603373	0.00328466	3	CATL_SARPE	5e-82	Cathepsin L
SMED30017762	2.40769	6.5879e-145	1.01454	1.28808e-22	1
SMED30017805	3.33044	4.45669e-42	3.22415	2.16316e-34	1	TTPAL_HUMAN	4e-24	Alpha-tocopherol transfer protein-like [Homo sapiens]
SMED30017811	1.0921	1.68663e-110	0.548615	5.71946e-23	3	ACTN4_MOUSE	0	Alpha-actinin-4
SMED30017845	0.181399	0.0143754	1.05052	1.26647e-49	2	A1M_RAT	2e-96	Alpha-1-macroglobulin
SMED30017940	1.54197	1.74597e-114	0.922231	4.3788e-35	3	CATL2_HUMAN	5e-122	Cathepsin L2
SMED30018045	1.4939	1.3679e-33	0.72248	3.26e-07	3
SMED30018133	6.80536	5.73883e-09	5.99453	3.07989e-14	2
SMED30018184	0.775198	7.05715e-38	1.55021	1.70764e-124	2	BEST3_HUMAN	7e-44	Bestrophin-3
SMED30018369	1.24752	2.01894e-36	0.907416	1.51027e-14	3	PTEN_MOUSE	2e-73	Phosphatidylinositol 3,4,5-trisphosphate 3-phosphatase and dual-specificity protein phosphatase PTEN
SMED30018379	1.89693	3.24666e-15	0.649793	0.073669	3
SMED30018398	-0.186011	0.183171	1.4839	1.3327e-43	2	SODC_HORSE	1e-33	Superoxide dismutase [Equus caballus]
SMED30018435	1.01703	2.23081e-80	0.591485	1.05749e-21	3	ITA5_MOUSE	1e-11	Integrin alpha-5
SMED30018606	3.10598	4.36795e-35	1.82988	2.41782e-07	3
SMED30018781	2.09094	3.36575e-91	0.0828691	0.66228	3	VAL5_VESMC	1e-32	Venom allergen 5
SMED30018801	1.13109	2.64013e-21	-0.366463	0.0804546	3	UNC9_CAEEL	5e-24	Innexin unc-9
SMED30018819	1.86259	2.80658e-42	1.82852	1.20835e-34	1
SMED30018825	1.16806	3.40898e-24	0.676582	2.05595e-06	3	RHBL2_MOUSE	6e-38	Rhomboid-related protein 2
SMED30018862	5.02447	1.45931e-64	0.0706513	0.960854	3	CPE1A_XENLA	2e-87	Cytoplasmic polyadenylation element-binding protein 1-A
SMED30019156	1.93706	4.30732e-96	1.10215	2.60934e-24	1	TENA_DROME	0.0001	Teneurin-a
SMED30019249	0.421436	0.000627383	1.14941	3.53689e-20	2
SMED30019423	1.05568	7.47295e-13	1.41188	4.05785e-18	2
SMED30019554	-0.959958	5.13022e-06	1.35323	1.15808e-15	2
SMED30019698	2.79767	2.34643e-46	1.23512	9.34436e-06	3	PRS6B_HUMAN	0	26S protease regulatory subunit 6B
SMED30019810	1.86653	5.1349e-14	0.305293	0.466142	3	PTP69_DROME	3e-19	Tyrosine-protein phosphatase 69D
SMED30019873	2.6275	1.78299e-31	3.89413	1.05371e-53	1	PLMN_MACEU	7e-25	Plasminogen
SMED30019921	2.0758	2.33102e-21	-1.69229	0.000288928	3
SMED30019945	1.38201	5.60594e-56	0.609144	1.19403e-09	3	GRN_HUMAN	2e-19	Granulins
SMED30019962	-0.0405676	0.753822	1.01371	4.50694e-34	2	PPR3E_MOUSE	8e-22	Protein phosphatase 1 regulatory subunit 3E [Mus musculus]
SMED30020022	1.07438	1.37244e-27	0.29782	0.0286083	3	ETS4_DROME	6e-06	DNA-binding protein D-ETS-4 [Drosophila melanogaster]
SMED30020116	1.56732	1.4966e-70	0.288331	0.0160325	3	PTPRB_HUMAN	5e-45	Receptor-type tyrosine-protein phosphatase beta
SMED30020154	3.74475	1.13801e-18	0.541778	0.544208	3
SMED30020210	0.223053	0.0334784	1.02983	3.81272e-25	2	VKT31_MESMA	9e-17	Kunitz-type serine protease inhibitor BmKTT-2
SMED30020231	-0.00713038	0.978246	1.5785	1.10997e-21	2
SMED30020397	8.56611	7.37089e-26	3.24923	0.00936305	3	VKT52_ANESU	2e-18	Kunitz-type proteinase inhibitor 5 II
SMED30020539	2.94323	1.72844e-27	2.52401	1.29198e-17	1	CSPG2_BOVIN	2e-08	Versican core protein
SMED30020602	-0.61893	1.88294e-08	1.16101	3.51523e-24	2	CBPA2_HUMAN	1e-70	Carboxypeptidase A2
SMED30020662	1.00872	1.79243e-29	0.941316	3.05968e-21	3	NPC2_HUMAN	2e-31	Epididymal secretory protein E1
SMED30020663	0.564849	2.24659e-13	1.37842	4.58947e-65	2
SMED30020669	0.414924	5.09129e-05	1.37799	2.64076e-45	2	PZP_HUMAN	1e-18	Pregnancy zone protein
SMED30020778	-1.05406	5.78185e-38	1.10538	9.91389e-37	2	ORCT_DROME	6e-32	Organic cation transporter protein [Drosophila melanogaster]
SMED30020821	1.00418	7.62623e-23	0.341271	0.00789199	3
SMED30020840	1.24148	3.17276e-47	0.925694	2.94422e-18	3	RCN2V_CROAD	5e-34	Reticulocalbin-2
SMED30020946	1.37336	4.17162e-53	0.440386	7.36466e-05	3	DHX8_HUMAN	4e-171	ATP-dependent RNA helicase DHX8
SMED30021024	1.94099	1.91395e-21	-0.201019	0.563108	3
SMED30021191	-0.98871	0.0107231	1.78899	1.80205e-17	2
SMED30021238	1.5448	4.59464e-56	0.242139	0.103347	3	HEM2_MACFA	2e-136	Delta-aminolevulinic acid dehydratase
SMED30021277	2.88492	1.77833e-25	1.88588	1.13874e-08	3
SMED30021397	5.28794	3.38174e-43	4.22131	1.27919e-25	1	VKT_HETCR	2e-14	Kunitz-type serine protease inhibitor InhVJ
SMED30021461	2.84755	6.81794e-90	-1.73498	5.59982e-08	3	H2B1_TIGCA	5e-53	Histone H2B.1/H2B.2 [Tigriopus californicus]
SMED30021495	2.2945	2.17926e-48	0.354739	0.297529	3	IFRD1_HUMAN	3e-19	Interferon-related developmental regulator 1
SMED30021661	0.745974	2.0846e-22	1.00877	8.64144e-34	2	CAH7_HUMAN	1e-39	Carbonic anhydrase 7
SMED30021673	0.966307	1.13693e-14	1.59902	9.95208e-35	2
SMED30021709	7.3626	5.04808e-57	-0.0774073	0.959077	3
SMED30021741	1.68465	8.81426e-23	1.23563	7.23433e-09	3	BRS4_BOMOR	3e-15	[Phe13]-bombesin receptor
SMED30021776	5.81859	2.00203e-305	-4.41607	1.12886e-07	3	H3_DROME	1e-91	Histone H3 [Drosophila melanogaster]
SMED30021828	1.82522	1.79231e-68	0.261718	0.100153	3
SMED30021889	1.11692	1.36436e-23	0.178411	0.287799	3	Y3950_MYCS2	2e-08	Universal stress protein MSMEG_3950/MSMEI_3859
SMED30021983	0.762044	3.73189e-09	1.15467	4.56063e-18	2
SMED30022030	1.6489	4.9116e-14	2.19023	6.47851e-14	1	EGR4_MOUSE	2e-24	Early growth response protein 4
SMED30022278	2.01527	1.90433e-127	-0.303198	0.0216408	3	MARF_DROME	6e-24	Transmembrane GTPase Marf
SMED30022321	4.69594	1.8565e-60	1.11355	0.147183	3	FRIM_TRENE	2e-11	Ferritin, middle subunit
SMED30022428	0.274494	0.00484231	1.13204	3.70853e-34	2	RN167_MOUSE	2e-14	E3 ubiquitin-protein ligase RNF167
SMED30022438	1.36841	4.51789e-53	0.503834	0.00049442	3	GAB1_MESAU	6e-05	GRB2-associated-binding protein 1
SMED30022453	-1.0162	1.07143e-37	1.20906	8.61779e-48	2	AQP_DROME	8e-33	Aquaporin [Drosophila melanogaster]
SMED30022521	1.408	5.39038e-70	0.986802	4.4487e-27	3
SMED30022580	2.57211	5.24369e-23	-0.672043	0.202306	3	LOZEN_DROME	5e-30	Protein lozenge [Drosophila melanogaster]
SMED30022656	0.761917	3.39589e-07	1.66126	7.80259e-26	2
SMED30022678	0.522711	1.18623e-09	1.22382	5.1269e-41	2
SMED30022734	9.65324	2.82717e-61	9.01199	7.28498e-56	1
SMED30022783	1.85503	3.03465e-21	-0.0594546	0.906721	3
SMED30022811	2.25024	4.90408e-17	0.420219	0.410695	3	TCAF1_MOUSE	5e-10	TRPM8 channel-associated factor 1
SMED30022889	0.294785	0.0170729	1.13494	3.22245e-24	2	SEPT7_RAT	4e-65	Septin-7
SMED30022897	0.550404	3.55955e-05	1.20238	1.6159e-18	2	TCAF3_RAT	2e-18	TRPM8 channel-associated factor 3
SMED30023103	0.680322	2.1384e-24	1.03254	7.32173e-46	2
SMED30023111	1.00165	8.97791e-56	1.04537	3.83723e-50	1
SMED30023146	0.0680055	0.607202	1.0453	3.6172e-30	2
SMED30023175	4.07643	4.83492e-29	0.630033	0.611934	3
SMED30023181	3.40988	7.09517e-22	1.73014	0.00184281	3
SMED30023246	7.50955	2.44094e-20	2.43567	0.312259	3	RPAP2_RAT	9e-16	RNA polymerase II subunit B1 CTD phosphatase Rpap2
SMED30023473	0.663055	1.04862e-23	1.1113	1.48204e-54	2	NOTC4_HUMAN	7e-06	Neurogenic locus notch homolog protein 4
SMED30023483	1.75747	7.65952e-68	-0.786926	9.46366e-07	3	UNC9_CAEEL	2e-50	Innexin unc-9
SMED30023505	8.09076	1.04942e-106	4.28889	1.58008e-14	1
SMED30023510	0.439478	1.77393e-07	1.82704	3.51274e-101	2	OAT_DROAN	2e-50	Ornithine aminotransferase, mitochondrial
SMED30023527	1.42285	8.36684e-26	0.593387	0.00150036	3	P2RX4_HUMAN	8e-92	P2X purinoceptor 4
SMED30023730	0.382154	0.0340152	1.38638	8.17816e-16	2
SMED30023874	-0.695973	1.40003e-18	1.04102	4.66901e-37	2	ACY1_MOUSE	3e-98	Aminoacylase-1
SMED30023884	0.530692	4.9348e-10	1.6219	1.3649e-75	2	IRS1_XENTR	8e-10	Insulin receptor substrate 1
SMED30023929	0.722228	0.00174784	1.88102	3.82577e-19	2
SMED30024045	0.986937	7.29774e-15	1.11877	3.99518e-14	2
SMED30024071	1.05351	5.80846e-30	0.422854	0.000465179	3	ZN384_RAT	4e-05	Zinc finger protein 384
SMED30024144	2.89863	1.19889e-46	0.865083	0.00160718	3
SMED30024185	0.225832	0.0167486	1.46023	5.38118e-69	2	NTCP2_RAT	1e-40	Ileal sodium/bile acid cotransporter
SMED30024278	0.649269	4.50122e-15	1.06598	3.79531e-31	2	DGKI_HUMAN	1e-112	Diacylglycerol kinase iota
SMED30024391	3.39767	7.6265e-32	4.65113	4.70215e-49	1	COL11_CHICK	1e-12	Collectin-11
SMED30024487	1.02201	1.14113e-14	1.01998	4.87201e-10	3
SMED30024491	0.959813	1.68021e-19	1.08559	2.59586e-20	2
SMED30024527	0.38106	4.35761e-10	1.02018	1.10022e-55	2	AT1A_TAESO	0	Sodium/potassium-transporting ATPase subunit alpha
SMED30024778	1.95828	2.58496e-94	0.938033	4.6022e-17	3	SBSPO_BOVIN	3e-15	Somatomedin-B and thrombospondin type-1 domain-containing protein
SMED30024836	1.12699	2.81967e-30	1.38312	7.99045e-37	1	TCAF2_HUMAN	1e-38	TRPM8 channel-associated factor 2
SMED30024859	2.79852	1.26454e-82	0.088753	0.828104	3	TFPI2_BOVIN	6e-11	Tissue factor pathway inhibitor 2
SMED30024864	1.57295	1.56925e-44	0.320252	0.0653404	3
SMED30024919	2.8271	1.56677e-92	-0.276155	0.378963	3
SMED30024925	2.46995	2.13873e-16	1.0056	0.0555919	3	DYL2_RAT	8e-55	Dynein light chain 2, cytoplasmic
SMED30024953	1.7806	4.79822e-17	1.1875	4.99352e-05	3	UBE4B_MOUSE	1e-94	Ubiquitin conjugation factor E4 B
SMED30025058	3.4899	8.08129e-21	-1.5589	0.200438	3
SMED30025252	1.632	9.62562e-39	0.468947	0.0110604	3
SMED30025384	1.07264	2.48605e-26	0.6856	5.32178e-09	3
SMED30025482	3.73514	2.19648e-58	-1.39698	0.0186243	3	H4_MYTCH	6e-50	Histone H4 [Mytilus chilensis]
SMED30025550	1.56868	9.09325e-39	0.968693	2.91623e-11	3
SMED30025599	1.72218	3.02135e-39	0.429608	0.0171231	3	SAX_LITCT	3e-07	Saxiphilin
SMED30025639	0.543101	8.29895e-16	1.21851	5.4931e-67	2	S22A5_MOUSE	9e-38	Solute carrier family 22 member 5
SMED30025728	2.1973	1.01861e-44	0.696715	0.00511075	3	DIRA2_PONAB	4e-23	GTP-binding protein Di-Ras2
SMED30025844	1.06054	2.32943e-15	0.659541	3.34043e-05	3
SMED30025924	1.69588	2.33078e-17	0.339574	0.329125	3
SMED30025969	6.59618	5.86522e-64	0.576181	0.787032	3	PKNX2_PONAB	0.0001	Homeobox protein PKNOX2
SMED30025985	1.39351	1.08868e-28	0.497378	0.00271886	3
SMED30026267	2.31794	7.84582e-112	0.566514	2.12964e-06	3
SMED30026542	7.96029	3.93485e-116	1.37276	0.510208	3
SMED30026775	3.86477	4.40746e-14	2.11706	0.0327857	3
SMED30026807	1.17109	4.9806e-46	0.472287	9.00939e-07	3
SMED30026864	3.17311	2.94202e-14	1.30866	0.0351255	3
SMED30026898	2.15195	5.76105e-06	3.66802	3.36149e-16	2
SMED30026933	1.07001	6.29699e-14	1.12154	9.91491e-13	3
SMED30027028	2.33358	2.54501e-20	0.853088	0.0144345	3	TRPM4_HUMAN	3e-08	Transient receptor potential cation channel subfamily M member 4
SMED30027157	2.69025	2.02505e-31	2.56238	7.86317e-23	1
SMED30027223	0.152191	0.205448	1.09633	6.06343e-26	2	CBPA1_BOVIN	3e-05	Carboxypeptidase A1
SMED30027224	2.20594	9.73023e-28	0.655778	0.111392	3
SMED30027500	1.76288	5.09913e-63	1.32205	1.32493e-29	1
SMED30027554	2.41931	2.57699e-64	0.574086	0.053145	3	CACB3_RABIT	9e-37	Voltage-dependent L-type calcium channel subunit beta-3
SMED30027564	0.60068	1.3248e-10	1.03136	2.17848e-25	2
SMED30027621	1.65835	8.90863e-29	-0.0140039	0.968502	3
SMED30027690	2.23778	1.08097e-22	0.349992	0.368578	3	TRF6B_XENLA	1e-07	TNF receptor-associated factor 6-B
SMED30027878	1.45425	5.30631e-16	1.11049	4.00002e-07	3	TEGU_SCHMA	7e-16	Tegument antigen
SMED30027940	1.11176	1.61237e-27	-0.833189	1.06836e-07	3	CNBD2_MACFA	2e-16	Cyclic nucleotide-binding domain-containing protein 2 [Macaca fascicularis]
SMED30028063	0.963873	1.47869e-35	1.27558	9.13096e-54	2
SMED30028425	0.271813	3.16396e-09	1.01869	2.01694e-103	2	B3AT_HUMAN	4e-83	Band 3 anion transport protein
SMED30028458	-0.939911	1.49429e-05	1.42607	2.9549e-16	2	GGPPS_HUMAN	1e-84	Geranylgeranyl pyrophosphate synthase
SMED30028474	5.14213	3.53178e-28	2.85825	0.0338791	3
SMED30028480	0.198298	0.0642626	1.17567	3.95913e-37	2	S22AG_XENLA	5e-49	Solute carrier family 22 member 16
SMED30028497	0.347695	0.000246779	1.16976	1.44278e-33	2	SAHHB_XENLA	0	Adenosylhomocysteinase B
SMED30028503	1.02283	1.07228e-12	1.39574	5.46442e-19	2
SMED30028552	1.19272	0.0339144	5.53879	1.81536e-32	2
SMED30028563	0.676399	0.0156087	2.99417	3.46295e-30	2
SMED30028588	0.321147	0.0188151	1.21451	2.13278e-22	2	PHYD1_HUMAN	8e-75	Phytanoyl-CoA dioxygenase domain-containing protein 1 [Homo sapiens]
SMED30028596	-0.203926	0.0232937	1.1157	1.27065e-42	2	OTC_SHEEP	2e-130	Ornithine carbamoyltransferase, mitochondrial
SMED30028826	1.57862	3.81829e-27	1.10416	2.09391e-11	3
SMED30028883	1.8268	1.81769e-79	1.08105	1.14271e-21	1	PGRP2_MOUSE	1e-13	N-acetylmuramoyl-L-alanine amidase
SMED30028961	1.51391	3.22886e-140	1.63358	2.04451e-137	1	IMDH2_HUMAN	8e-124	Inosine-5'-monophosphate dehydrogenase 2
SMED30028977	0.483487	0.0283786	1.93844	1.13769e-23	2	AT1B1_CAEEL	7e-17	Sodium/potassium-transporting ATPase subunit beta-1
SMED30029013	-0.21666	0.179032	1.52497	2.40989e-37	2	P2RX4_MOUSE	5e-62	P2X purinoceptor 4
SMED30029036	4.22126	1.80182e-37	0.77268	0.3729	3
SMED30029190	1.73586	7.36983e-22	0.729869	0.00272872	3
SMED30029200	0.707514	1.73215e-12	1.18937	6.77297e-27	2
SMED30029235	-0.138544	0.118419	1.45319	1.22679e-77	2	CPSM_HUMAN	0	Carbamoyl-phosphate synthase [ammonia], mitochondrial
SMED30029247	9.72935	2.82851e-20	6.88566	1.29496e-15	1
SMED30029249	0.547822	8.92613e-09	1.08671	4.89698e-27	2	NIM1_HUMAN	2e-130	Serine/threonine-protein kinase NIM1
SMED30029256	1.28521	9.07841e-29	0.497587	0.000686949	3
SMED30029272	0.442494	2.35834e-10	1.13586	4.24487e-55	2	SC6A1_RAT	0	Sodium- and chloride-dependent GABA transporter 1
SMED30029290	2.53944	6.08868e-32	1.00483	0.00033863	3
SMED30029291	-1.04703	3.1727e-11	1.29736	3.39741e-19	2
SMED30029331	1.47333	9.44415e-17	2.27248	7.96744e-39	1	GNAI1_RAT	2e-161	Guanine nucleotide-binding protein G(i) subunit alpha-1
SMED30029344	1.48352	2.9241e-16	-0.279195	0.363914	3
SMED30029435	5.73719	5.84492e-48	-1.71491	0.290294	3
SMED30029540	6.06232	1.85021e-23	0	1	3
SMED30029625	-0.211732	0.00184039	1.00427	1.25871e-51	2	S39AE_MOUSE	5e-69	Zinc transporter ZIP14
SMED30029640	1.57171	3.59716e-24	0.941589	5.29804e-07	3
SMED30029696	1.89789	4.92776e-21	0.902455	0.000254521	3
SMED30029767	0.765227	9.028e-25	1.58658	3.34895e-86	2	MRC1_HUMAN	1e-24	Macrophage mannose receptor 1
SMED30029780	1.53397	1.15492e-15	2.03433	3.3484e-18	1	EGR4_MOUSE	5e-25	Early growth response protein 4
SMED30029783	0.165422	0.460547	1.40927	5.03201e-17	2
SMED30029936	1.47084	1.27441e-79	1.39721	2.74608e-59	1	ZNT10_MOUSE	1e-63	Zinc transporter 10
SMED30029987	0.591757	7.86291e-07	1.21235	4.70098e-22	2
SMED30030028	7.02391	4.25114e-15	-1.92334	0.50077	3	FRIS_LYMST	7e-11	Soma ferritin [Lymnaea stagnalis]
SMED30030068	1.99236	8.77089e-83	0.56984	5.38355e-05	3
SMED30030099	1.17883	1.78502e-16	0.725456	9.11551e-05	3
SMED30030233	1.16228	1.91157e-14	1.71865	6.50211e-26	1	LRC58_MOUSE	1e-57	Leucine-rich repeat-containing protein 58 [Mus musculus]
SMED30030302	1.69852	1.89754e-16	0.133218	0.778364	3
SMED30030310	1.75695	4.06092e-109	1.32439	1.23136e-52	1
SMED30030336	2.64814	1.02162e-18	2.48377	9.96703e-15	1
SMED30030402	-0.471511	1.65834e-09	1.20284	7.84886e-53	2	LGRD_BREPA	5e-119	Linear gramicidin synthase subunit D
SMED30030421	1.66562	3.68721e-16	-0.0737274	0.893981	3	MPEG1_BOVIN	2e-20	Macrophage-expressed gene 1 protein
SMED30030464	2.19595	3.96956e-30	0.852206	0.000956064	3
SMED30030498	2.15501	5.35199e-55	-0.058108	0.864116	3
SMED30031202	5.14033	4.3957e-15	5.05239	9.1358e-23	1
SMED30031347	4.32009	1.5696e-28	1.57098	0.135224	3	ABCF3_MOUSE	1e-93	ATP-binding cassette sub-family F member 3 [Mus musculus]
SMED30031417	-0.0414396	0.751009	1.00786	1.33397e-32	2	AMNLS_HUMAN	3e-18	Protein amnionless
SMED30031478	1.45946	2.5034e-97	0.673696	2.85172e-17	3
SMED30031509	-0.253158	0.106417	1.01696	2.94875e-15	2	ASM3B_HUMAN	9e-55	Acid sphingomyelinase-like phosphodiesterase 3b
SMED30031519	1.05468	1.54498e-60	0.502958	3.46256e-10	3	FYN_XIPHE	8e-179	Tyrosine-protein kinase Fyn
SMED30031545	3.27042	5.48811e-23	1.34264	0.00154375	3
SMED30031649	3.0001	1.06766e-32	0.582457	0.136595	3
SMED30031695	1.73252	2.82903e-23	0.791424	0.00431963	3
SMED30031707	1.11724	2.9287e-21	0.766153	1.96913e-06	3
SMED30031729	5.37046	9.83741e-17	0.634584	0.627646	3	ST14_MOUSE	2e-53	Suppressor of tumorigenicity 14 protein homolog
SMED30031741	1.02898	3.80665e-21	1.0557	5.47185e-18	1	MOT14_MOUSE	5e-36	Monocarboxylate transporter 14
SMED30031752	0.462922	0.00263665	1.28538	1.53051e-18	2	CNNM4_XENTR	6e-99	Metal transporter CNNM4
SMED30031855	1.03861	9.5655e-47	1.49572	5.22018e-80	1	GLNA_PANAR	0	Glutamine synthetase
SMED30031920	1.51438	4.50122e-15	-0.15593	0.700183	3	CML13_ORYSJ	3e-05	Probable calcium-binding protein CML13
SMED30031956	1.19415	3.25662e-21	0.743821	5.0804e-06	3	STUM_DROME	2e-15	Protein stum [Drosophila melanogaster]
SMED30032145	2.02926	3.73249e-19	1.54553	8.73435e-08	3	FGD3_MOUSE	5e-08	FYVE, RhoGEF and PH domain-containing protein 3 [Mus musculus]
SMED30032341	1.36562	5.49482e-71	0.537706	2.61482e-08	3	ANK3_RAT	4e-90	Ankyrin-3
SMED30032350	2.36847	1.09449e-92	-0.11793	0.625474	3
SMED30032377	1.90923	2.2804e-32	-0.527858	0.168947	3
SMED30032382	0.988689	1.11835e-08	1.85827	2.50643e-23	2
SMED30032619	4.6375	6.73078e-14	1.50393	0.327176	3	ERF1_POLMI	0	Eukaryotic peptide chain release factor subunit 1
SMED30032676	-0.778965	0.00476549	2.29074	1.11576e-29	2
SMED30032789	-0.767343	0.000291892	1.82646	1.00155e-21	2	YMD3_CAEEL	1e-11	Putative uncharacterized transposon-derived protein F54H12.3 [Caenorhabditis elegans]
SMED30032931	1.75228	4.6187e-54	0.400089	0.0204583	3	VWDE_HUMAN	3e-45	von Willebrand factor D and EGF domain-containing protein
SMED30033010	0.0280596	0.857634	1.12724	5.61795e-32	2	DAB_DROME	2e-15	Protein disabled [Drosophila melanogaster]
SMED30033017	2.12594	6.65342e-15	-0.675735	0.263645	3	TPA_HUMAN	5e-10	Tissue-type plasminogen activator
SMED30033140	0.186739	0.0359979	1.23491	1.29607e-52	2	ENOF1_BOVIN	0	Mitochondrial enolase superfamily member 1
SMED30033233	2.03079	5.54511e-20	1.90681	7.05345e-13	3
SMED30033235	1.34177	2.6912e-21	0.208551	0.440712	3
SMED30033239	3.28339	1.83936e-46	1.51858	6.18354e-08	3
SMED30033303	1.29911	5.31686e-20	1.28906	1.48231e-16	1	CSD_STAAN	1e-28	Probable cysteine desulfurase [Staphylococcus aureus subsp. aureus N315]
SMED30033316	2.56093	2.70351e-14	1.3575	0.0124031	3
SMED30033351	1.35561	1.12035e-16	0.34247	0.199021	3
SMED30033466	2.7813	5.75151e-32	-1.73235	0.00119448	3	H4_MYTTR	1e-50	Histone H4 [Mytilus trossulus]
SMED30033467	1.71279	4.24901e-64	0.47199	8.35918e-05	3	SAP_CAVPO	2e-05	Saposin-C
SMED30033522	1.09232	2.81021e-82	0.804231	8.83786e-37	3	CATC_HUMAN	6e-151	Dipeptidyl peptidase 1
SMED30033583	1.70625	8.16184e-17	-1.12597	0.0034153	3
SMED30033611	0.758565	6.8042e-29	1.3316	1.08387e-72	2
SMED30033630	3.04067	6.49251e-166	0.721781	6.9262e-08	3	POL4_DROME	7e-15	Retrovirus-related Pol polyprotein from transposon 412
SMED30033665	1.48177	4.27805e-34	-2.9601	3.06309e-24	3
SMED30033672	1.18485	8.35907e-53	0.425466	5.41383e-05	3	KMCP1_XENTR	1e-92	Kidney mitochondrial carrier protein 1
SMED30033769	1.3108	1.19332e-42	-0.324344	0.0368539	3
SMED30033800	3.72947	2.3225e-20	4.65284	1.30973e-29	1
SMED30034259	1.08143	9.35613e-15	0.757907	2.95504e-06	3	MYG_HALDV	1e-52	Myoglobin [Haliotis diversicolor]
SMED30034279	1.00823	3.06348e-22	0.871837	4.55237e-14	3	ZAN_HUMAN	8e-32	Zonadhesin
SMED30034302	0.846691	0.104119	3.9474	2.11744e-20	2
SMED30034331	-2.01228	2.37187e-75	1.0366	3.13119e-26	2	CDD_MOUSE	3e-32	Cytidine deaminase
SMED30034380	1.18014	3.05009e-33	1.1534	3.55118e-26	1
SMED30034500	2.56997	1.27474e-83	1.40915	3.07681e-16	1	EGR4_MOUSE	1e-31	Early growth response protein 4
SMED30034502	0.132377	0.363087	1.23511	1.77424e-27	2
SMED30034503	1.12656	7.60051e-55	0.369533	1.52101e-05	3	GRN_HUMAN	2e-16	Granulins
SMED30034574	1.72209	2.1728e-17	2.66873	3.06589e-33	1	CTR1_MOUSE	2e-65	High affinity cationic amino acid transporter 1
SMED30034598	1.67647	1.14267e-23	0.97978	7.85722e-06	3	NPSR1_MOUSE	4e-09	Neuropeptide S receptor
SMED30034647	0.225159	0.0261372	1.09797	1.70846e-31	2	VKT1_ANESU	2e-14	Kunitz-type serine protease inhibitor kalicludine-1
SMED30034777	4.23405	3.19472e-23	-0.854832	0.589566	3
SMED30034838	7.63533	1.40982e-22	1.90739	0.272704	3	CSK2A_SCHPO	2e-122	Casein kinase II subunit alpha
SMED30034855	1.47994	6.13453e-16	0.836584	0.000363501	3	5HTR_LYMST	1e-60	5-hydroxytryptamine receptor
SMED30034930	0.930587	3.51425e-17	1.08814	2.40501e-19	2	ZAN_PIG	6e-32	Zonadhesin
SMED30034946	1.98811	2.11077e-115	0.711252	1.14903e-11	3	DUS10_BOVIN	4e-39	Dual specificity protein phosphatase 10 [Bos taurus]
SMED30034998	1.26007	8.77377e-24	0.389619	0.0494376	3	CTBP1_CAEEL	6e-59	C-terminal-binding protein 1 [Caenorhabditis elegans]
SMED30035001	3.13919	8.50726e-31	2.73419	4.31473e-21	1	CNFN_MOUSE	8e-13	Cornifelin [Mus musculus]
SMED30035058	1.74439	1.92914e-106	0.549583	9.08065e-09	3	AQP_DROME	3e-28	Aquaporin [Drosophila melanogaster]
SMED30035264	3.52909	2.02476e-41	1.02054	0.00271804	3
SMED30035331	4.86854	6.35184e-137	1.04887	0.0184589	3	UNC9_CAEEL	2e-40	Innexin unc-9
SMED30035418	2.79277	3.30823e-151	0.0256605	0.920469	3	TMPS3_HUMAN	1e-53	Transmembrane protease serine 3
SMED30035446	0.577345	1.85393e-09	1.07098	1.90407e-25	2
SMED30035485	3.88555	4.24949e-81	4.35415	1.4352e-88	1
SMED30035504	0.288841	0.0255764	1.22869	2.48046e-24	2	SPRE_BOVIN	2e-37	Sepiapterin reductase
SMED30035592	2.78127	7.31239e-161	1.95846	1.02836e-70	1	MIB1_MOUSE	5e-74	E3 ubiquitin-protein ligase MIB1
SMED30035691	-0.176319	0.286009	1.36946	8.39664e-28	2	MPEG1_BOVIN	9e-122	Macrophage-expressed gene 1 protein
SMED30035750	0.236786	0.0576017	1.08273	2.46186e-22	2	CP2J6_MOUSE	2e-67	Cytochrome P450 2J6
SMED30035782	-1.26479	6.89103e-38	1.66624	1.77908e-76	2	TNKS_DROME	6e-14	Tankyrase
SMED30035823	3.23377	6.06481e-33	0.632845	0.575323	3	KC1G1_RAT	5e-68	Casein kinase I isoform gamma-1
SMED30035896	5.75115	3.82547e-142	0.261767	0.723438	3
SMED30035950	0.801759	1.32844e-12	1.29852	8.94134e-28	2
SMED30035965	1.23331	7.26678e-84	0.500576	1.75268e-11	3	NAV3_MOUSE	2e-163	Neuron navigator 3
SMED30036022	1.03494	3.80084e-64	0.125165	0.172423	3	LYAG_PONAB	0	Lysosomal alpha-glucosidase

## Sheet: flags_key
flags	description
1	genes significantly up-regulated in both chd4(d15) RNAi and p53(d18) RNAi data sets (p.adj <1e-13; log2 fold change>1)
2	unique genes significantly up-regulated in p53(d18) RNAi data set only (p.adj <1e-13; log2 fold change>1)
3	unique genes significantly up-regulated in chd4(d15) RNAi data set only (p.adj <1e-13; log2 fold change>1)
