# Supplementary material for: Egr-5 is a post-mitotic regulator of planarian epidermal differentiation
Source: eLife. 2015 Oct 12;4:e10501. doi: 10.7554/eLife.10501 (PMC4716842; doi:10.7554/eLife.10501)
Supplement: Supplementary file 3. — Tab 1, List of 147 genes cloned and screened by colorimetric WISH. Tab 2, Summary of 29 candidate genes chosen from in situ screen (Figure 1E, Figure 2) characterized by triple FISH with AGAT-1 and zpuf-6. DOI: http://dx.doi.org/10.7554/eLife.10501.028 [file elife-10501-supp3.xls]

## Sheet: Cloned genes WISH
id	chd4_d12	chd4_d15	p53_d12	p53_d15	p53_d18	chd4.12.padj	chd4.15.padj	p53.12.padj	p53.15.padj	p53.18.padj	Top Swiss-prot ID	E-value	Swiss-prot description	WISH pattern
SMED30000058	-2.274	-2.113	-2.164	-2.174	-2.095	1.73326e-81	8.57479e-71	1.09776e-76	1.35301e-73	1.31794e-49				AGAT-1 mesenchymal
SMED30000639	-1.379	-1.273	-0.813	-0.608	-0.707	6.80016e-57	4.12571e-49	1.25202e-20	4.62691e-12	1.08604e-12	DYST_MOUSE	2e-70	Dystonin	gut
SMED30000827	-0.917	-1.281	-1.101	-1.32	-1.699	5.81261e-24	4.38492e-45	1.28734e-33	3.86505e-47	7.39657e-56				AGAT-1 mesenchymal and epidermal
SMED30000902	-2.068	-2.78	-2.542	-2.792	-3.531	2.46514e-45	2.07557e-74	1.66573e-65	1.01968e-74	2.73681e-73				AGAT-1 mesenchymal
SMED30001121	-2.928	-4.493	-0.947	-1.481	-1.409	2.15482e-145	6.24138e-237	1.5138e-22	5.54455e-50	3.3565e-34	GRM3_RAT	1e-79	Metabotropic glutamate receptor 3	gut
SMED30001471	-1.551	-1.744	-1.072	-1.102	-1.692	2.43005e-56	1.29547e-68	2.09711e-31	3.52197e-32	7.71968e-48	CP2BB_CANFA	1e-63	Cytochrome P450 2B11	no pattern, potentially weak in gut
SMED30001567	-1.895	-2.434	-2.327	-2.621	-3.412	3.59324e-57	1.23664e-87	7.48653e-83	1.8739e-98	3.083e-105				AGAT-1 mesenchymal
SMED30002098	-0.954	-1.255	-1.288	-1.554	-1.956	3.00479e-37	1.4198e-61	2.96283e-65	1.14274e-88	3.94662e-94	CBPN_BOVIN	4e-69	Carboxypeptidase N catalytic chain	AGAT-1 mesenchymal
SMED30002213	-0.555	-0.814	-0.516	-0.643	-0.47	6.2841e-17	2.14935e-35	1.77151e-14	6.14385e-23	6.43557e-10	GLAS_DROVI	5e-16	Protein glass [Drosophila virilis]	gut
SMED30002215	-1.759	-2.183	-1.477	-2.171	-1.843	4.99562e-31	1.94425e-44	3.93024e-24	1.18242e-43	1.07591e-22				AGAT-1 mesenchymal
SMED30002242	-2.165	-2.864	-4.158	-5.077	-3.967	2.71914e-59	7.01241e-83	4.12908e-148	9.42909e-148	2.27532e-84	NUCB1_RAT	5e-31	Nucleobindin-1	AGAT-1 mesenchymal
SMED30002356	-2.598	-3.376	-3.842	-4.921	-4.441	6.73239e-60	2.02854e-79	1.2365e-103	4.55573e-114	3.03334e-73				weak; AGAT-1 mesenchymal
SMED30002877	-0.223	-0.509	-0.658	-0.836	-1.26	0.107167	1.72559e-05	6.11552e-08	4.68012e-13	2.87267e-19	IQEC1_HUMAN	2e-11	IQ motif and SEC7 domain-containing protein 1	discrete mesenchymal dee;p also inside the pharynx
SMED30003044	-1.896	-2.487	-3.679	-4.38	-4.335	1.54976e-19	5.78154e-28	4.62544e-48	2.64905e-49	1.1329e-30	CALUA_DANRE	5e-11	Calumenin-A	weak, AGAT-1 mesenchymal and epidermal
SMED30003172	-0.518	-0.637	-0.853	-1.017	-1.182	1.16464e-14	1.42652e-21	1.62542e-37	3.8593e-51	1.45878e-50	PURA_SCHJA	0	Adenylosuccinate synthetase	multiple tissues: gut and discrete mesenchymal cells
SMED30003242	0.134	-0.281	-0.316	-0.891	-0.91	0.303727	0.00551608	0.00315037	7.03458e-20	3.38109e-15	WDR3_MOUSE	8e-78	WD repeat-containing protein 3 [Mus musculus]	very weak; maybe neoblast like
SMED30003449	-0.39	-0.481	-0.862	-1.116	-1.459	0.00505119	7.61606e-05	3.96844e-11	9.95281e-19	2.94097e-22	CP2C7_RAT	4e-38	Cytochrome P450 2C7	very weak; gut and pharynx
SMED30003809	-3.761	-5.885	-3.282	-4.093	-3.664	1.88011e-42	4.14857e-84	1.89988e-33	2.56582e-48	6.44253e-29	VIT_FENME	3e-36	Vitellogenin	gut
SMED30003947	-1.252	-1.216	-0.835	-1.054	-1.234	6.52611e-31	7.06741e-29	3.48811e-15	1.91526e-22	4.47166e-23	TRPM7_MOUSE	9e-14	Transient receptor potential cation channel subfamily M member 7	gut and hazy expression
SMED30004532	-0.075	-0.209	-0.426	-0.539	-0.862	0.560265	0.030973	2.02455e-06	6.80131e-10	2.35855e-18	YBOX1_RAT	4e-12	Nuclease-sensitive element-binding protein 1	discrete cells everywhere except in pharynx
SMED30004606	-1.803	-2.022	-0.894	-1.093	-1.013	5.47642e-54	4.02766e-65	1.26756e-14	4.33584e-21	2.28395e-14	CP2J6_MOUSE	3e-70	Cytochrome P450 2J6	gut
SMED30004747	-1.05	-1.257	-0.582	-0.862	-0.583	1.81964e-53	3.0517e-75	1.19813e-17	4.78736e-37	8.26671e-14	CP3A9_RAT	7e-104	Cytochrome P450 3A9	gut
SMED30005357	-1.712	-1.851	-2.279	-2.555	-3.113	3.12581e-75	2.55322e-86	4.91343e-126	1.87054e-149	1.12133e-144				AGAT-1 mesenchymal
SMED30005508	-2.254	-2.649	-2.038	-2.284	-2.198	1.74105e-104	5.38194e-139	4.43481e-88	2.20436e-107	2.73681e-73	ACSL5_MOUSE	1e-167	Long-chain-fatty-acid--CoA ligase 5	gut
SMED30005644	-1.696	-2.008	-2.326	-2.452	-2.833	3.01194e-59	1.19319e-79	7.87432e-105	5.48901e-111	3.68799e-99				AGAT-1 mesenchymal
SMED30005740	-2.034	-2.163	-2.528	-2.802	-3.061	6.74235e-70	3.49788e-77	8.27038e-103	2.2064e-117	3.79148e-96				no pattern; hazy everywhere
SMED30005802	-0.32	-0.439	-0.551	-0.573	-0.947	3.70852e-05	4.06834e-09	9.81887e-14	1.26822e-14	1.23581e-28	NUCL_XENLA	8e-08	Nucleolin	neoblast like and discrete mesenchymal cells
SMED30005873	0.063	-0.356	-0.268	-0.515	-0.829	0.624901	0.000150329	0.0153541	1.88525e-08	7.62062e-15	TBL3_MOUSE	2e-72	Transducin beta-like protein 3 [Mus musculus]	hazy pattern; likely in irradiation sensiitve cells
SMED30006065	0.285	0.335	0.055	-0.481	-1.928	0.0654962	0.0219406	0.89887	0.000939337	1.06236e-23	ASPM_MOUSE	0	Abnormal spindle-like microcephaly-associated protein homolog	AGAT-1 mesenchymal and epidermal
SMED30006083	-2.266	-3.21	-3.185	-3.592	-4.161	1.39538e-53	5.86592e-81	5.25221e-90	2.48561e-91	2.73681e-73				multiple tissues: AGAT-1 mesenchymal and gut
SMED30006674	-1.299	-0.925	-0.957	-0.66	-1.623	5.45543e-14	2.11127e-07	4.09839e-09	0.000385672	3.95944e-14				hazy mesenchymal pattern
SMED30007534	-0.751	-0.843	-0.794	-0.956	-1.446	6.36523e-09	1.54936e-10	5.77957e-10	5.73491e-13	2.35387e-19	LLPH_MOUSE	1e-05	Protein LLP homolog	very weak; maybe neoblast like
SMED30008120	-1.159	-1.177	-2.597	-2.694	-3.216	5.71143e-20	1.46188e-20	1.35271e-86	8.45133e-90	2.74733e-85				AGAT-1 mesenchymal
SMED30008855	-2.103	-3.611	-1.031	-1.336	-0.989	2.38025e-72	2.88967e-165	4.03118e-20	9.19388e-33	1.59929e-14	ATP7B_MOUSE	0	Copper-transporting ATPase 2	strong gut expression and discrete brain cells
SMED30009017	-2.693	-3.64	-0.826	-0.99	-1.233	4.55656e-63	2.91744e-85	1.43842e-11	1.2618e-14	1.49013e-15				gu; stronger hazy expression in posterior
SMED30009513	-1.827	-2.104	-1.99	-2.371	-2.935	9.83418e-72	1.39692e-93	4.18941e-84	5.28615e-115	2.19022e-118	GATM_BOVIN	1e-118	Glycine amidinotransferase, mitochondrial	AGAT-1 mesenchymal
SMED30010366	-2.112	-2.638	-2.06	-1.978	-2.376	9.48585e-54	6.9482e-68	1.01928e-55	1.43646e-45	4.4453e-44	DIC_HUMAN	3e-86	Mitochondrial dicarboxylate carrier	multiple tissues: gut and discrete mesenchymal cells
SMED30010528	-0.194	-1.151	-1.01	-1.279	-1.611	0.0689714	4.14343e-39	1.57968e-29	4.67214e-47	6.42749e-54				gut and mesenchyme
SMED30010951	-2.142	-2.362	-2.108	-2.458	-2.498	4.3109e-107	7.19166e-126	2.63231e-105	1.73869e-133	3.36489e-98				AGAT-1 mesenchymal
SMED30010986	-2.849	-4.333	-0.96	-1.521	-1.323	5.35218e-57	1.98632e-89	1.07666e-10	7.74382e-23	5.62319e-14	LOL2A_DANRE	1e-71	Lysyl oxidase homolog 2A	weak; in gut
SMED30011140	-0.327	-0.362	-1.563	-1.585	-1.797	0.000144058	1.87263e-05	1.26229e-78	1.83084e-77	2.53353e-70	ASSY_XENLA	0	Argininosuccinate synthase	AGAT-1 mesenchymal
SMED30011221	-0.395	-0.699	-0.425	-0.775	-1.258	2.81064e-09	1.63522e-27	1.2019e-10	2.46106e-33	3.24075e-61	HSP7C_CRIGR	9e-150	Heat shock cognate 71 kDa protein	everywhere but in the pharynx
SMED30011291	-3.621	-4.528	-1.754	-2.007	-2.969	8.41044e-187	3.42821e-222	3.32275e-73	3.31165e-85	2.13754e-100	PA2HS_ECHCO	5e-16	Phospholipase A2 homolog	AGAT-1 mesenchymal
SMED30011447	-2.695	-3.007	-2.908	-3.14	-3.39	8.51329e-79	5.35549e-92	9.74594e-91	1.83936e-97	2.95641e-77				hazy pattern; likely in irradiation sensiitve cells
SMED30011727	-2.315	-2.783	-1.228	-1.41	-1.109	4.35852e-147	1.04032e-196	7.99909e-48	2.98922e-61	6.87238e-30	DOCK1_HUMAN	4e-60	Dedicator of cytokinesis protein 1	strong gut expression and discrete mesencyhmal cells
SMED30011793	-2.153	-4.336	-1.367	-2.064	-1.555	6.7382e-52	1.19007e-161	2.06501e-22	2.07191e-48	8.99798e-22	DTH1_GIRTI	0	Homeobox protein DTH-1 [Girardia tigrina]	gut
SMED30012767	-1.787	-2.479	-2.158	-2.436	-2.441	3.24383e-43	2.79752e-77	6.84354e-61	1.4542e-74	4.03091e-55				AGAT-1 mesenchymal
SMED30013319	-0.788	-1.031	-1.077	-0.908	-1.07	9.56331e-28	4.78167e-47	2.47192e-50	2.69143e-36	2.17283e-38	ACBG2_XENLA	0	Long-chain-fatty-acid--CoA ligase ACSBG2	multiple tissues: gut and epidermis
SMED30013885	-1.206	-1.927	-2.347	-2.513	-2.87	7.48855e-18	1.94664e-36	2.90539e-53	9.05213e-53	2.82515e-42				weak, AGAT-1 mesenchymal
SMED30014019	-0.187	-0.315	-0.361	-0.388	-0.981	0.120617	0.00290589	0.000803207	0.000194557	3.79391e-18	IFB1_CAEEL	6e-12	Intermediate filament protein ifb-1	epidermal
SMED30014639	-1.992	-2.123	-0.429	-0.57	-1.017	5.6026e-66	1.2559e-79	2.07678e-05	1.95976e-08	2.20147e-18	PANK2_ARATH	2e-05	Pantothenate kinase 2	no pattern
SMED30014713	-1.746	-1.995	-2.399	-2.737	-3.701	2.2726e-42	1.06602e-53	6.9655e-75	3.60476e-91	5.56633e-102				AGAT-1 mesenchymal
SMED30015687	0.074	-0.32	-0.485	-1.162	-2.549	0.846609	0.163183	0.0124231	1.35617e-08	4.25417e-20	RNF8_BOVIN	7e-11	E3 ubiquitin-protein ligase RNF8	very weak; neoblast like and discrete cells
SMED30016382	-2.914	-2.326	-2.712	-2.806	-3.049	1.27598e-84	9.43634e-56	2.38315e-81	5.19949e-71	9.266e-56				weak; AGAT-1 mesenchymal
SMED30016464	-3.149	-3.621	-0.796	-1.111	-1.36	9.40581e-165	3.29375e-184	1.41797e-17	7.72555e-31	8.26089e-32	CP3AO_SHEEP	4e-75	Cytochrome P450 3A24	gut
SMED30017236	-2.22	-3.156	-0.782	-1.189	-1.063	4.70292e-50	4.56613e-81	1.16281e-08	8.27207e-18	3.12843e-11	TRAF6_RAT	1e-06	TNF receptor-associated factor 6	weak in gut
SMED30018252	-2.177	-3.131	-0.906	-1.523	-1.05	9.27087e-56	1.06922e-106	1.39811e-10	1.66735e-28	4.03999e-11	CYSP2_HOMAM	9e-117	Digestive cysteine proteinase 2	gut
SMED30018353	-1.932	-2.205	-2.055	-2.336	-2.762	1.38296e-90	6.12888e-116	9.23009e-102	2.28122e-127	6.20207e-121	GATM_MOUSE	5e-124	Glycine amidinotransferase, mitochondrial	control
SMED30018716	0.026	-0.146	-0.285	-0.614	-1.168	0.859398	0.134571	0.00100764	7.02448e-14	7.55938e-34	AN32A_DROME	1e-26	Acidic leucine-rich nuclear phosphoprotein 32 family member A [Drosophila melanogaster]	neoblast like and discrete mesenchymal cells
SMED30018924	-2.283	-2.826	-2.911	-3.345	-3.921	7.12856e-46	2.53807e-66	5.3842e-70	1.73275e-86	7.32166e-78				AGAT-1 mesenchymal
SMED30018929	-1.986	-2.156	-2.407	-2.642	-2.871	1.1518e-73	3.38608e-78	4.32869e-103	1.24202e-103	4.27277e-82				weak; AGAT-1 mesenchymal
SMED30019040	-1.408	-2.057	-0.645	-0.899	-0.935	3.15102e-83	1.98986e-164	3.74118e-19	2.96059e-36	1.13148e-29	CP3AC_CANFA	1e-73	Cytochrome P450 3A12	gut
SMED30019154	-1.424	-1.71	-2.121	-2.498	-2.858	4.35327e-45	2.98837e-63	2.60326e-93	7.84931e-121	4.26602e-105	GATM_RAT	2e-117	Glycine amidinotransferase, mitochondrial	AGAT-1 mesenchymal
SMED30019697	-5.184	-6.627	-2.92	-4.109	-4.448	5.71521e-89	9.42336e-106	1.48399e-46	5.73673e-71	1.83224e-54	ACMSD_MOUSE	8e-124	2-amino-3-carboxymuconate-6-semialdehyde decarboxylase	N/A
SMED30019743	-0.668	-1.274	-2.403	-2.868	-2.993	1.38638e-08	3.9266e-25	7.45139e-69	1.72585e-80	4.40661e-58				super weak in gut
SMED30020710	-0.278	-0.308	-1.499	-1.415	-2.296	0.125309	0.07103	3.04789e-25	2.99775e-21	5.83181e-25	SCOT_DICDI	9e-22	Probable succinyl-CoA:3-ketoacid coenzyme A transferase, mitochondrial	N/A
SMED30020794	-1.645	-1.995	-2.449	-2.706	-3.162	4.94679e-48	2.14108e-67	3.53376e-97	7.02408e-110	4.15926e-96				AGAT-1 mesenchymal
SMED30020797	-0.976	-0.948	-0.675	-0.695	-0.746	1.46942e-26	1.23024e-25	9.91339e-14	9.23102e-15	1.69134e-12	POGK_MOUSE	4e-13	Pogo transposable element with KRAB domain [Mus musculus]	outline of gut cells and faint mesencyhmal cells
SMED30020865	-1.711	-1.781	-1.556	-1.977	-2.046	7.55933e-149	3.59243e-159	6.31207e-129	8.24446e-189	8.08221e-141	TRHDE_RAT	4e-76	Thyrotropin-releasing hormone-degrading ectoenzyme	AGAT-1 mesenchymal
SMED30020964	-1.518	-2.299	-3.893	-4.894	-5.629	2.88176e-33	3.80014e-58	3.65438e-114	3.82106e-116	2.90747e-86	MOCS3_CULQU	2e-86	Adenylyltransferase and sulfurtransferase MOCS3	weak; AGAT-1 mesenchymal
SMED30021048	-0.626	-0.755	-1.001	-1.324	-2.649	0.0114013	0.00198098	1.3808e-05	7.37314e-08	1.40864e-15	RU1C_NEMVE	2e-10	U1 small nuclear ribonucleoprotein C	very weak; maybe neoblast like
SMED30021059	-1.43	-1.663	-1.548	-1.344	-1.816	5.29314e-33	4.86848e-44	1.87304e-40	3.77737e-31	1.46324e-36	TRAF6_BOVIN	3e-09	TNF receptor-associated factor 6	weak hazy mesenchyme cells and in pharynx
SMED30021359	-1.589	-1.787	-1.342	-1.497	-2.49	3.68759e-21	2.15182e-22	4.82763e-18	4.58274e-17	2.63796e-21				hazy; no pattern
SMED30021752	-1.074	-1.388	-0.569	-0.71	-1.007	7.65246e-35	2.18353e-56	9.14069e-11	1.73609e-16	2.60001e-24	CP2L1_PANAR	1e-65	Cytochrome P450 2L1	gut
SMED30021793	-1.286	-1.189	-2.131	-2.078	-2.491	1.46689e-20	7.4766e-18	6.34767e-52	2.37109e-49	7.1626e-50				AGAT-1 mesenchymal
SMED30021960	-1.792	-2.191	-0.794	-0.9	-0.711	1.56931e-168	1.24581e-243	8.31917e-37	5.72501e-47	3.33864e-23	AMPE_RAT	3e-76	Glutamyl aminopeptidase	discrete gut cells and protoneprhidia
SMED30022130	-1.302	-1.758	-3.095	-3.413	-3.369	5.40067e-23	6.89622e-39	1.21658e-100	2.74032e-109	5.16371e-74				AGAT-1 mesenchymal
SMED30022325	-0.818	-1.154	-0.764	-0.984	-1.394	2.44453e-31	4.13421e-61	4.83139e-28	4.32864e-45	1.60013e-62				discrete cells throughout mesenchyme
SMED30022437	0.276	0.022	-0.31	-0.706	-1.275	0.0242256	0.924891	0.0110169	1.37123e-09	3.15166e-19	RFA2_PONAB	2e-23	Replication protein A 32 kDa subunit	neoblast like
SMED30022784	-1.83	-1.508	-3.536	-3.566	-4.365	1.05017e-16	6.61791e-12	1.02148e-42	2.5252e-36	1.67957e-30				AGAT-1 mesenchymal
SMED30023006	-3.041	-5.133	-1.384	-1.931	-1.571	3.70317e-122	1.86001e-211	6.59602e-37	9.0213e-64	6.55525e-34	CELR1_HUMAN	2e-17	Cadherin EGF LAG seven-pass G-type receptor 1	gut
SMED30023062	0.009	-0.41	-0.62	-1.332	-2.276	0.952503	1.34736e-06	1.07398e-13	3.85437e-58	4.75835e-111	CEL3A_XENLA	3e-66	CUGBP Elav-like family member 3-A	neoblast
SMED30023109	-0.738	-1.01	-0.528	-0.787	-1.061	1.44921e-12	4.83163e-23	1.1376e-06	3.75527e-14	3.67943e-19	CATL1_HUMAN	1e-96	Cathepsin L1	edge of head; also in epithelium
SMED30023307	-2.101	-4.628	-1.595	-1.949	-1.604	5.03064e-43	1.83184e-140	3.01474e-26	2.02774e-37	7.40156e-20	TRAF5_MOUSE	1e-11	TNF receptor-associated factor 5 [Mus musculus]	gut
SMED30023489	-0.567	-0.593	-0.59	-0.588	-0.956	3.86143e-15	4.90321e-16	2.18806e-16	1.91401e-15	9.52494e-29	CISD3_MOUSE	9e-14	CDGSH iron-sulfur domain-containing protein 3, mitochondrial	AGAT-1 mesenchymal but weakly expressed everywhere
SMED30023536	-1.413	-1.642	-0.797	-0.888	-1.408	7.64671e-82	9.06685e-103	5.51388e-29	2.53331e-34	8.46925e-58	MGST3_HUMAN	1e-19	Microsomal glutathione S-transferase 3	AGAT-1 mesenchymal
SMED30023708	0.832	0.237	-2.245	-2.583	-2.837	1.38671e-20	0.0256225	8.74917e-81	5.2106e-86	3.35016e-68	ZN341_HUMAN	2e-11	Zinc finger protein 341 [Homo sapiens]	neoblast
SMED30024165	-1.311	-1.788	-4.863	-7.527	-6.486	2.42977e-11	1.29555e-19	1.04828e-68	1.28429e-80	3.20658e-42				weak; AGAT-1 mesenchymal
SMED30024671	-0.119	-0.044	-0.566	-0.626	-1.08	0.304275	0.764843	9.52843e-11	4.37506e-11	9.90066e-23	TI13B_XENLA	2e-21	Mitochondrial import inner membrane translocase subunit Tim13-B [Xenopus laevis]	fuzzy expression
SMED30024865	0.12	-0.169	-0.3	-0.212	-1.171	0.284471	0.0951636	0.00156021	0.0315465	5.92625e-33	NF60_DORPE	2e-72	60 kDa neurofilament protein	epidermal
SMED30024934	-2.643	-3.162	-1.969	-1.897	-2.174	7.32076e-45	2.6215e-48	3.50918e-33	1.12831e-30	2.8357e-16	BDH_RAT	2e-45	D-beta-hydroxybutyrate dehydrogenase, mitochondrial	very weak, AGAT-1 mesenchymal and pharynx
SMED30025522	-0.068	-0.335	-0.357	-0.562	-0.954	0.432677	7.87652e-08	2.24924e-08	4.60118e-20	3.3803e-43	CH60_CHICK	0	60 kDa heat shock protein, mitochondrial	everywhere
SMED30025584	-1.16	-1.109	-1.486	-1.58	-2.342	9.62678e-28	1.70531e-25	1.89045e-43	3.25423e-47	1.96223e-63				AGAT-1 mesenchymal
SMED30025603	-3.012	-3.78	-3.351	-3.703	-4.217	3.93339e-87	8.47003e-124	1.86501e-104	3.98531e-119	2.54737e-100				AGAT-1 mesenchymal
SMED30025781	0.201	-0.367	-0.408	-1.425	-1.517	0.140841	0.00126044	0.000807484	1.8556e-37	1.31627e-29	WDR36_HUMAN	2e-97	WD repeat-containing protein 36	neoblast-like and in mesenchyme
SMED30025885	-0.035	-0.185	-0.572	-1.07	-2.457	0.873526	0.411012	0.000694733	2.08904e-09	1.31978e-23	TRAF4_HUMAN	5e-07	TNF receptor-associated factor 4	neoblast and prog-1 like
SMED30026014	-0.087	-0.428	-0.396	-1.122	-1.118	0.539316	5.69929e-06	4.05007e-05	7.86036e-30	1.34755e-20	WDHD1_XENLA	4e-53	WD repeat and HMG-box DNA-binding protein 1	no pattern
SMED30026394	-2.422	-3.178	-2.855	-3.125	-3.403	6.7375e-81	4.8315e-130	1.37997e-107	2.16994e-125	2.59858e-102				AGAT-1 mesenchymal
SMED30026414	-1.161	-1.297	-1.95	-2.28	-2.514	5.73734e-31	2.03722e-38	1.12681e-77	4.27022e-96	2.66852e-78	M17L2_DANRE	2e-25	Mpv17-like protein 2 [Danio rerio]	AGAT-1 mesenchymal
SMED30026622	0.405	-0.122	0.259	-0.436	-2.255	0.0518226	0.690257	0.32364	0.0303349	1.24708e-16	GCNT1_MOUSE	4e-53	Beta-1,3-galactosyl-O-glycosyl-glycoprotein beta-1,6-N-acetylglucosaminyltransferase	hazy, maybe neoblast like
SMED30026668	0.164	-0.374	-0.395	-0.887	-0.947	0.25609	0.00118115	0.000506943	4.16542e-15	9.93471e-13	COQ7_HUMAN	6e-81	Ubiquinone biosynthesis protein COQ7 homolog	neoblast like
SMED30026757	-1.302	-1.248	-2.587	-2.401	-2.469	1.45633e-30	4.05914e-27	3.72967e-92	4.09371e-72	2.67338e-48	CP2A3_RAT	4e-35	Cytochrome P450 2A3	multiple tissues: AGAT-1 mesenchymal and pharynx
SMED30027034	-5.619	-8.776	-1.864	-2.484	-2.496	3.91854e-119	4.28749e-167	6.06829e-22	7.1625e-37	3.32954e-27	LCYD1_ORYSJ	1e-36	Putative L-cysteine desulfhydrase 1	gut
SMED30027156	-2.7	-2.866	-2.433	-2.68	-3.627	1.46084e-89	3.31036e-98	2.54279e-76	2.7931e-87	4.46242e-97				AGAT-1 mesenchymal
SMED30027207	-0.08	0.054	-1.173	-1.352	-1.926	0.44323	0.622852	1.72142e-55	9.0903e-71	5.52685e-94	DCOR1_XENLA	1e-83	Ornithine decarboxylase 1	AGAT-1 mesenchymal
SMED30027243	-3.428	-5.77	-1.259	-1.907	-1.4	2.81001e-121	1.1046e-184	1.68956e-27	2.12884e-53	2.96141e-23	LOL2A_DANRE	3e-68	Lysyl oxidase homolog 2A	gut
SMED30027266	-2.237	-2.353	-1.545	-1.86	-2.313	6.13143e-59	1.30586e-62	7.01316e-37	5.62497e-46	2.29302e-43				stringy cells in between gut branches
SMED30027296	-2.391	-3.589	-0.784	-1.152	-1.079	1.55949e-102	1.64683e-205	1.65406e-12	2.28644e-26	4.79752e-18	PANK1_ORYSJ	3e-18	Pantothenate kinase 1	gut
SMED30027942	-3.387	-5.47	-3.441	-4.665	-4.297	1.82209e-58	1.27511e-112	1.83288e-60	7.80649e-93	1.21593e-57				gut
SMED30028142	-2.015	-2.273	-3.234	-3.491	-4.161	6.24629e-32	1.00911e-39	6.34512e-73	5.06893e-82	7.15091e-76				AGAT-1 mesenchymal
SMED30028287	-1.312	-1.151	-2.208	-2.052	-2.59	6.17326e-24	1.05649e-18	1.72196e-60	2.69868e-51	7.92651e-55				AGAT-1 mesenchymal
SMED30028428	0.138	-0.068	-0.295	-0.675	-1.018	0.259468	0.621455	0.00346456	2.7055e-11	3.83625e-18	PARP1_CHICK	0	Poly [ADP-ribose] polymerase 1	weak hazy mesenchyme and discrete mesenchymal cells
SMED30028574	-1.511	-2.235	-0.465	-0.949	-1.067	3.8513e-69	5.47833e-143	1.15247e-07	5.60453e-30	9.44232e-29	CP2B4_RABIT	3e-70	Cytochrome P450 2B4	multiple tissues: gut and epidermis
SMED30029098	-1.06	-1.47	-0.765	-0.939	-1.05	3.59749e-48	3.07426e-93	2.11718e-26	6.68004e-41	8.3387e-39	HEM6_DROME	1e-137	Oxygen-dependent coproporphyrinogen-III oxidase	outer gut cells
SMED30029717	-1.866	-2.251	-1.707	-1.749	-2.375	5.59489e-17	3.11356e-21	6.84667e-17	9.88315e-15	2.64092e-16				very weak discrete cells; maybe also in neoblasts
SMED30029873	-0.614	-0.887	-1.197	-1.166	-1.286	2.67871e-17	2.00862e-35	6.34539e-60	8.52736e-57	3.45061e-47	EGR1_TAEGU	2e-27	Early growth response protein 1	AGAT-1 mesenchymal
SMED30030198	0.347	0.116	0.03	-0.474	-1.074	4.38958e-06	0.198282	0.876079	2.82684e-10	4.31452e-34	LBR_MOUSE	8e-63	Lamin-B receptor	strong neoblast-like expression
SMED30030292	-1.1	-1.105	-1.711	-1.675	-1.793	8.8257e-48	9.46671e-49	6.83852e-109	4.58041e-104	1.10447e-85	CP1A1_MOUSE	1e-46	Cytochrome P450 1A1	AGAT-1 mesenchymal
SMED30030422	-1.376	-1.328	-1.94	-2.105	-2.707	5.19562e-32	8.02475e-30	5.85798e-60	2.12897e-64	7.53293e-66				AGAT-1 mesenchymal
SMED30030642	-2.038	-2.34	-1.731	-1.93	-2.413	4.6583e-79	1.79908e-98	7.27943e-62	3.08395e-71	3.20081e-71	CP2U1_HUMAN	2e-46	Cytochrome P450 2U1 [Homo sapiens]	multiple tissues: AGAT-1 mesenchymal and pharynx
SMED30030679	-1.953	-1.786	-0.755	-0.964	-0.923	1.00504e-140	8.88347e-127	1.3676e-26	4.83704e-42	1.13328e-28	ELOV7_MOUSE	7e-41	Elongation of very long chain fatty acids protein 7	AGAT-1 mesenchymal
SMED30030751	-0.65	-0.89	-2.048	-2.406	-2.626	4.5152e-08	5.87204e-12	7.4074e-50	2.70953e-50	9.3441e-41	FGFR1_DUGJA	1e-52	Fibroblast growth factor receptor 1	weak, discrete mesenchymal cells throughout
SMED30030818	-0.018	-0.206	-0.274	-0.499	-0.613	0.865558	0.000952453	1.02246e-05	4.85556e-17	9.0518e-19	HNRPK_CHICK	8e-37	Heterogeneous nuclear ribonucleoprotein K	discrete mesenchymal cells and in brain
SMED30031061	-1.42	-1.546	-2.304	-2.324	-2.646	2.24031e-45	1.46395e-50	1.86501e-104	4.0385e-96	6.80807e-82	NUCB1_BOVIN	3e-34	Nucleobindin-1	AGAT-1 mesenchymal
SMED30031080	0.132	-0.14	-0.11	-0.529	-0.684	0.0887593	0.0651485	0.17516	1.80707e-15	1.13435e-18	GRP33_ARTSA	5e-32	Glycine-rich protein GRP33 [Artemia salina]	neoblast like, discrete cells above photoreceptors
SMED30031307	-0.574	-0.991	-1.687	-2.32	-2.318	6.65452e-06	8.58012e-16	1.41778e-40	2.96011e-67	1.75349e-48				hazy mesencyme but discrete mesenchymal cells
SMED30031447	-0.125	-0.522	-0.607	-1.024	-1.584	0.437546	4.61155e-05	1.20543e-06	5.06753e-16	2.5146e-24	1433B_BOVIN	2e-105	14-3-3 protein beta/alpha	hazy mesenchyme pattern
SMED30031507	0.134	-0.142	-0.386	-1.012	-1.728	0.46702	0.359894	0.00570571	3.07194e-13	1.69834e-22	ZN333_HUMAN	6e-22	Zinc finger protein 333 [Homo sapiens]	faint pattern maybe neoblast like
SMED30031568	-1.511	-1.613	-1.915	-2.218	-2.601	5.04173e-69	2.59042e-77	1.68818e-106	4.74298e-130	1.33156e-115	C13AA_CAEEL	1e-38	Putative cytochrome P450 CYP13A10 [Caenorhabditis elegans]	AGAT-1 mesenchymal
SMED30031862	-1.138	-1.569	-0.436	-0.725	-0.69	3.075e-35	3.24662e-66	9.94037e-07	1.80428e-17	1.43575e-11	RB27B_MOUSE	1e-57	Ras-related protein Rab-27B [Mus musculus]	weak; AGAT-1 mesenchymal, epithelium, pharynx
SMED30031929	0.13	-0.074	-0.544	-0.696	-0.991	0.355508	0.636679	8.92702e-07	6.56506e-11	6.51485e-16	YQ58_CAEEL	7e-14	Uncharacterized protein C16C10.8 [Caenorhabditis elegans]	weak; neoblast like
SMED30032112	-1.955	-1.707	-1.44	-1.986	-1.69	4.25135e-35	6.51177e-32	4.35142e-23	8.27849e-39	3.8415e-20	SRR_ARATH	2e-65	Serine racemase	weird mesenhcymal pattern; stringy cells
SMED30032169	-1.469	-1.654	-2.422	-2.795	-3.252	5.18378e-45	6.59869e-56	2.23725e-109	4.11338e-134	2.19022e-118	GATM_XENLA	3e-118	Glycine amidinotransferase, mitochondrial	AGAT-1 mesenchymal
SMED30032538	-0.413	-0.415	-0.616	-0.917	-0.833	7.72953e-08	2.3797e-08	1.34139e-16	4.34507e-34	1.84533e-21	S18B1_MOUSE	3e-25	MFS-type transporter SLC18B1	weak; AGAT-1 mesenchymal
SMED30032645	0.117	0.045	-0.213	-0.47	-0.886	0.205727	0.676959	0.00942955	2.68562e-10	3.89874e-26	CBX1_HUMAN	1e-47	Chromobox protein homolog 1	neoblast like
SMED30032823	-1.973	-2.148	-1.92	-1.928	-1.809	1.36914e-108	1.27988e-127	4.13206e-103	5.45362e-104	1.06325e-68	NETR_SAGLB	9e-86	Neurotrypsin	N/A
SMED30033179	-0.935	-1.137	-0.534	-0.757	-0.562	7.83886e-40	6.08017e-58	9.42523e-14	5.35421e-27	5.92294e-12	EHD1_HUMAN	0	EH domain-containing protein 1	gut
SMED30033476	-1.062	-1.535	-0.734	-1.008	-0.885	4.63853e-34	2.51699e-68	4.266e-17	3.35777e-31	4.88094e-19	ZN395_XENLA	2e-07	Zinc finger protein 395 [Xenopus laevis]	gut
SMED30033686	-0.889	-1.097	-0.562	-0.523	-0.475	4.22395e-30	3.67869e-45	5.27878e-14	1.97884e-12	2.20457e-08	TRAF3_MOUSE	6e-18	TNF receptor-associated factor 3	gut
SMED30033916	-4.351	-5.842	-1.901	-2.09	-2.001	4.25545e-233	9.7786e-289	2.62797e-70	2.71622e-79	4.14572e-53	OXDD_HUMAN	8e-64	D-aspartate oxidase	gut
SMED30034257	-0.349	-0.814	-1.56	-2.025	-2.505	0.00079453	2.37635e-17	4.5615e-55	2.47549e-84	1.5882e-80	TTPAL_HUMAN	3e-20	Alpha-tocopherol transfer protein-like [Homo sapiens]	AGAT-1 mesenchymal
SMED30034490	-0.244	-0.673	-1.901	-2.183	-2.491	0.00437991	1.16265e-16	3.62469e-106	2.97786e-119	1.06432e-99	FGFR1_DUGJA	5e-62	Fibroblast growth factor receptor 1	neoblasts and discrete mesenchymal cells
SMED30034520	0.253	0.101	-0.869	-1.446	-3.203	0.09126	0.572739	1.06589e-10	4.4666e-23	3.33352e-52	RAD51_CRIGR	0	DNA repair protein RAD51 homolog 1 [Cricetulus griseus]	neoblast like
SMED30034746	-0.326	-0.133	-1.699	-2.099	-2.58	0.00136178	0.24842	6.1322e-65	5.7868e-80	8.9454e-76	AZIN2_XENLA	1e-56	Antizyme inhibitor 2	AGAT-1 mesenchymal
SMED30035148	-1.061	-1.504	-1.802	-2.105	-2.817	1.03515e-19	6.67374e-37	1.18007e-51	1.65804e-64	4.28531e-72				discrete mesenchymal cells (zpuf-6 like)
SMED30035250	-1.401	-1.896	-1.757	-2.174	-2.713	4.09459e-37	1.02177e-60	8.45439e-56	9.78564e-75	1.26496e-72	LITAF_CHICK	1e-13	Lipopolysaccharide-induced tumor necrosis factor-alpha factor homolog	AGAT-1 mesenchymal
SMED30035424	0.925	0.926	0.39	-0.103	-0.646	4.36757e-45	4.15562e-46	4.69375e-08	0.230086	1.84556e-15	NLK_CANFA	5e-135	Serine/threonine-protein kinase NLK	discrete cells throughout and in brain

## Sheet: 29 gene WISH summary
id	Name	Smed abbreviation	predicted function	WISH pattern	AGAT-1 overlap	AGAT-neg zpuf-6+ overlap	zpuf-6+ epidermal	other epidermal
SMED30000827	zeta-class associated protein of unknown function 5	zpuf-5	unknown	discrete mesenchymal cells and discrete epidermal cells (varying levels)	X	X	X
SMED30002213	zinc-finger protein 2	zfp-2	zinc-finger	gut and hazy	/
SMED30003172	adenylosuccinate synthase	adss	purine metabolism	gut; discrete mesenchymal cells (in addition to AGAT1 and zpuf-6); epithelium	X	X	**	**		key
SMED30004747	cytochrome P450 member 3G1	cyp3G1	monooxygenase activity	gut	/					/	not tested
SMED30005508	acyl-coA synthetase long-chain family member 1	acsl-1	fatty acid metabolism	gut	/					*	barely detectable
SMED30006083	zeta-class associated protein of unknown function 7	zpuf-7	unknown	gut and AGAT-1 mesenchymal	X	***				**	very weak
SMED30010366	solute carrier family 25, member 19	slc25a-19	transporter activity	gut and AGAT-1 mesenchymal	X	***	*			***	weak but distinct
SMED30011291	phospholipase A2	pla2	fatty acid metabolism	AGAT-1 mesenchymal	X	***	*			X	strong expression
SMED30011793	nkx-2.2	nkx-2.2	DNA binding	gut	/
SMED30013319	acyl-coA synthetase long-chain family member 2	acsl-2	fatty acid metabolism	gut; AGAT-1 mesenchymal; epithelium	X	X	X	X
SMED30018353	L-arginine:glycine amidinotranserase 1	AGAT-1	creatine metabolism	(reference)	X
SMED30018924	zeta-class associated protein of unknown function 4	zpuf-4	unknown	discrete mesenchymal cells	X
SMED30019040	cytochrome P450 member 3143A1	cyp3143A1	monooxygenase activity	gut	/
SMED30024865	vimentin-like 3	vim-3	cytoskeletal	epidermal		X	X	***
SMED30026414	mitochondrial inner membrane protein	mpv17	mitochondrial	AGAT-1 mesenchymal	X	X
SMED30027156	zeta-class associated protein of unknown function 1	zpuf-1	unknown	AGAT-1 mesenchymal	X
SMED30027207	ornithine decarboxylase 1	odc-1	polyamine biosynthesis	AGAT-1 mesenchymal	X	X	***
SMED30028142	zeta-class associated protein of unknown function 3	zpuf-3	unknown	AGAT-1 mesenchymal	X
SMED30028287	zeta-class associated protein of unknown function 2	zpuf-2	unknown	AGAT-1 mesenchymal	X	X	**
SMED30029873	early growth response 5	egr-5	DNA binding	AGAT-1 mesenchymal	X	***	**
SMED30030292	cytochrome P450 member 3140A1	cyp3140A1	monooxygenase activity	AGAT-1 mesenchymal	X	X	***
SMED30030642	cytochrome P450 member 3141A1	cyp3141A1	monooxygenase activity	AGAT-1 mesenchymal; discrete cells in pharynx	X	X	**
SMED30030681	zeta-class associated protein of unknown function 6	zpuf-6	unknown	AGAT-1 mesenchymal and discrete epidermall cells (reference)	X	X	X
SMED30031568	cytochrome P450 member 3142A1	cyp3142A1	monooxygenase activity	AGAT-1 mesenchymal	X
SMED30032169	glycine amidinotransferase mitochondrial	gatm	creatine metabolism	AGAT-1 mesenchymal	X
SMED30033476	zinc-finger protein 3	zfp-3	zinc-finger	gut	/
SMED30033686	TNF-receptor associated factor 4	traf-4	protein binding	gut	/
SMED30034257	tocopherol (alpha) transfer protein-like	ttpal	transporter activity	AGAT-1 mesenchymal	X	X	***
SMED30035250	lipopolysacchardie-induced TNF factor	litaf	DNA binding	AGAT-1 mesenchymal	X	X	**
