# Supplementary material for: Egr-5 is a post-mitotic regulator of planarian epidermal differentiation
Source: eLife. 2015 Oct 12;4:e10501. doi: 10.7554/eLife.10501 (PMC4716842; doi:10.7554/eLife.10501)
Supplement: Supplementary file 4. — DOI: http://dx.doi.org/10.7554/eLife.10501.029 [file elife-10501-supp4.xls]

## Sheet: primer sequences
id	primer_left	primer_right
SMED30023536	CATTACCATCCCGTACCTAAGTGTTCAGGTGCACG	CCAATTCTACCCGTACACAAGTGAGGCCCTTATGC
SMED30025781	CATTACCATCCCGTCATCCTTTGAAAGCGATTGGC	CCAATTCTACCCGTTGACAATTGAGTGCTGGAACG
SMED30005740	CATTACCATCCCGAACCACGTAAAACATCCACACG	CCAATTCTACCCGCTTTGCATCTGCCTCAACTTCC
SMED30018929	CATTACCATCCCGCGATCTGTTGGTTTCGTTGATTTAG	CCAATTCTACCCGGAGCTCTTGTTTCAAACCCGAG
SMED30025603	CATTACCATCCCGAGCGAATATAAAGCACTGTGTAATC	CCAATTCTACCCGTTATGCTCTTCCAAATCGTTGTC
SMED30010951	CATTACCATCCCGGCAAACGTCAAAGAAATGCGAC	CCAATTCTACCCGTGAGTTTGGTTTTGCATTTAAAATAGAC
SMED30005644	CATTACCATCCCGAGGTGACATTTCATTGCTGATGG	CCAATTCTACCCGACGTTTTCCACACACAAACAAAC
SMED30030422	CATTACCATCCCGATAAACTGTTTGCCCTTCCACG	CCAATTCTACCCGTTATTCGTTTCCAAAAGCTTTTCG
SMED30023062	CATTACCATCCCGAGGCTGTAGACAAAGACAACTC	CCAATTCTACCCGAATCCAACTCCATCTCCCTGAC
SMED30027156	CATTACCATCCCGGTTGCAGAGGATTTTGACACCC	CCAATTCTACCCGTGTCACACCTCGAATGCAATTG
SMED30011447	CATTACCATCCCGAGCATCTAGGGCAAATGAAAAATAATG	CCAATTCTACCCGGTGCTGCTAATGCGAATGTAGG
SMED30005357	CATTACCATCCCGGTTTCACAGTCCTACTAATACACTAAAC	CCAATTCTACCCGCAACCCGTCTCCAATTGTATGG
SMED30028428	CATTACCATCCCGTGCCAAAAGTTCAAGATCTTGTTG	CCAATTCTACCCGATATGACACACTAACACATCGAATC
SMED30021793	CATTACCATCCCGGTGAATTGGCTGTCAAAAAGGC	CCAATTCTACCCGTCGTTTGTGGAGCTGCTTTTTG
SMED30015687	CATTACCATCCCGTGAAATGTATCTTTTAGGTGTTGGG	CCAATTCTACCCGTTCGGTTGACGTTCTTGAACAG
SMED30028287	CATTACCATCCCGATCTGTTGGAAAGAGCTGGACC	CCAATTCTACCCGTGCTGGTTTCTTTGTTGTTTGTG
SMED30031307	CATTACCATCCCGAGGTGTAACCATAACCGATGAAG	CCAATTCTACCCGAGTCGACGAACTGGTGTTTTTG
SMED30000058	CATTACCATCCCGTTGCAATGACAGGCTGGATTTC	CCAATTCTACCCGTGACATTGATCTTGTTTACTTGCC
SMED30022130	CATTACCATCCCGAGATTTCTTCTGGCACTCTCCG	CCAATTCTACCCGAATCATGAAGCTCACAATCAGC
SMED30008120	CATTACCATCCCGAGGTTAGGTAGTGGTTAAAGCAAC	CCAATTCTACCCGTGAAAATTTTATTCCGATGTCATGGG
SMED30002098	CATTACCATCCCGATTAGTGAGTACGGTTGCTGTG	CCAATTCTACCCGCATGAACTGTCGTCTGATCCAAG
SMED30027207	CATTACCATCCCGCTCGGCTACATTGTTCATCAGC	CCAATTCTACCCGTCCGATCTGTGTATTAGCAAATAGC
SMED30028142	CATTACCATCCCGTCAAGAAAAGTACTATAACGTATTCGAG	CCAATTCTACCCGTAGAAACTTAAATGTCGACTTCGTAC
SMED30002242	CATTACCATCCCGTCTACTTTGCGGTGCTCTCTAC	CCAATTCTACCCGGCCTCTCAAATGAATGCGACTC
SMED30011291	CATTACCATCCCGTGAAAGATATTGAAAAATGCTTTGCCG	CCAATTCTACCCGATTTAATGTTCCAAGAGCCGCTC
SMED30014713	CATTACCATCCCGTACCGAATCAGAGTACCAGTCG	CCAATTCTACCCGTGAAGGTGTCCATTTGTAGTGC
SMED30031061	CATTACCATCCCGAAATGCTTGCGTAGTCCTACAC	CCAATTCTACCCGAGCCATTCAAGAATCCGAACTTG
SMED30002356	CATTACCATCCCGTAACGCAGCTCTATTGACGGAG	CCAATTCTACCCGGCCCAGTGATTTTGTTCCATTTC
SMED30023708	CATTACCATCCCGAAAATTTGCGAATAAACGAAAAATTTTG	CCAATTCTACCCGCTACGTCCATGGAGTCAGTTGG
SMED30001567	CATTACCATCCCGCGCATTTTCTATATTCGTTACTTTGGC	CCAATTCTACCCGTTTGAAACGAGGAATCTTTGGTC
SMED30035148	CATTACCATCCCGTGATGTTACGGATTATTTACGCG	CCAATTCTACCCGAAACTAGATCACAAATCATCAGTAGG
SMED30034257	CATTACCATCCCGCGATCTAGAGCACATTTAGTTGGC	CCAATTCTACCCGTCAACGGAAATATTTGCCCACG
SMED30020794	CATTACCATCCCGAACCTGAAATTCGGTGAGTGTG	CCAATTCTACCCGCCCAGAATGCCACTTGTCTTTC
SMED30034520	CATTACCATCCCGAAATGGTTCAGGCTGATGTTGC	CCAATTCTACCCGCAAAATTGCAAACATCGCCTCG
SMED30000827	CATTACCATCCCGTTCACTGTGCATTTCCAGCATC	CCAATTCTACCCGACGCATCTATAAAAGTAGGAGTCAC
SMED30031447	CATTACCATCCCGTCTTGGATTGATGCTGTCCAAG	CCAATTCTACCCGACGAAACAAACAAAAGCAATGG
SMED30029717	CATTACCATCCCGGCTCAGATTAAGCATGTATGTCG	CCAATTCTACCCGGAACTGGGTTAATGAAAGGCTG
SMED30010366	CATTACCATCCCGCTACACAATGCAATTAAAGGTTAACG	CCAATTCTACCCGTGACAAATGCCGGTACAATTCC
SMED30034746	CATTACCATCCCGTGCGACCATACCAAATATCGTG	CCAATTCTACCCGTCATTTCTGTTGGTCATTTTCAGAAC
SMED30002877	CATTACCATCCCGTGGTGGAAAAACTAACAAGTCAGC	CCAATTCTACCCGTGACCTTCACCTTGACGATGAC
SMED30025584	CATTACCATCCCGACAACCTACTTGCTTACACCTAC	CCAATTCTACCCGTGATTTGTCTTCTTCATTGGTCTGTC
SMED30013885	CATTACCATCCCGTCCGTCACAAACATTGTCAACC	CCAATTCTACCCGTCAAATTGTCGGAATCTGTCGAG
SMED30002215	CATTACCATCCCGAATCAGATGATTGGGAGGGTCG	CCAATTCTACCCGTTTATCCCCAAACCCTTTGCTG
SMED30007534	CATTACCATCCCGACAATAAATCATGGCTAAAGGATTACG	CCAATTCTACCCGTTTTTATTTTTAAGCTTCCTGATTGCTC
SMED30026014	CATTACCATCCCGTCTCAGGAATTACATCACAAGGGG	CCAATTCTACCCGTAATGGGCTCTCAATAGGGTGC
SMED30003242	CATTACCATCCCGCGCTCATGACACTTTATTTGGGG	CCAATTCTACCCGTCTGTGAATGTGAGGAGTTCCG
SMED30021048	CATTACCATCCCGTGTTTTAATAATATGTTGAAATGGCGAG	CCAATTCTACCCGTTCATGCACCATTAGCTTAAAATTTC
SMED30031929	CATTACCATCCCGGGTTGTTTTTGTATGCTCATCTTGC	CCAATTCTACCCGTGTTTTTCAGCAGTATTGTTTTCTTC
SMED30024671	CATTACCATCCCGTCAATGCGGATAACATGTGGAAC	CCAATTCTACCCGAACAAGTAAAAGCCCAAGCAGC
SMED30004532	CATTACCATCCCGACCCTACAAAGACAGCGTAGTC	CCAATTCTACCCGACTGTTTCCTTTATCCTGTTAAAGACAC
SMED30023109	CATTACCATCCCGCCTTCTGATGCGCATCGAATTC	CCAATTCTACCCGTTGGTTGTCCTTGTCTTTGCTC
SMED30026668	CATTACCATCCCGACTAGGGTTAATCATGCTGGGG	CCAATTCTACCCGTGTAAAAACAGAGAACATTAATGTGC
SMED30025885	CATTACCATCCCGATGGCTATGAAAAGTTACGTTCC	CCAATTCTACCCGCATGTAATTAGCTGATGATTATTTGCTC
SMED30031080	CATTACCATCCCGAGCAAGACAAAATCCATACCAAGC	CCAATTCTACCCGAGGATAATGTGGCTTTGGATATGG
SMED30022437	CATTACCATCCCGTTAAAAATGTGGGGGTCGTCAG	CCAATTCTACCCGACTCTCCATGAAGCGCAATTTC
SMED30035424	CATTACCATCCCGCTGCGAATGCCTACACACAAAC	CCAATTCTACCCGAACTATTCGATTCCCCGAGCAC
SMED30003044	CATTACCATCCCGGCATTTTAAACTTTCGAACACTAAAAGC	CCAATTCTACCCGTGTTGGCTTTTGTTCATCAGAC
SMED30031862	CATTACCATCCCGTTAGCTTTAGGGGACAGTTCGG	CCAATTCTACCCGACCTTTTTAGAGTGCTTACGGTTG
SMED30018716	CATTACCATCCCGAGTTAATCATTTCAAAAGTCTGCACC	CCAATTCTACCCGACGGTGAATTTTCAACATCCCC
SMED30025522	CATTACCATCCCGACTTTGCGATCTTGTACATACGC	CCAATTCTACCCGCATCATACCTCCCATTCCACCC
SMED30023489	CATTACCATCCCGTCATGTTTCATTGGTTACTACGCC	CCAATTCTACCCGTTAAAAGTCCGGCACAAATCCG
SMED30030818	CATTACCATCCCGTGATATTTTAAAATGGCCGATTCTCG	CCAATTCTACCCGAATCCTTCTTCGGCGAATTTGC
SMED30005802	CATTACCATCCCGTCGTGTGAAAATGGTTGTTAAAAAGC	CCAATTCTACCCGTCCCTCTTTTTGATAATAAGATCGCC
SMED30022325	CATTACCATCCCGGATTAACTTACAAAATCGATCGCG	CCAATTCTACCCGTTTTAATGTAATTAATTAGCCGCAGC
SMED30032645	CATTACCATCCCGTTGATAAAGCGCAAGTTCTTTATATTG	CCAATTCTACCCGCAGTTGTTGCCGCATTAGTAGG
SMED30022784	CATTACCATCCCGTCCTATAACTCAAGAATGAAACTGC	CCAATTCTACCCGCGCACCATCTTCCTCTTTGAAC
SMED30026622	CATTACCATCCCGCGAAAACAAAGCGCGACTTAATG	CCAATTCTACCCGCGATTTCCACAGTACCGGTTTG
SMED30030751	CATTACCATCCCGACTTTTTGTGATAGATAAAGATGGGCC	CCAATTCTACCCGTCGTTTAAAATATCACTCGTAGCGG
SMED30020964	CATTACCATCCCGCAACTGTTACAGCACACAGGAC	CCAATTCTACCCGTTTCAGCCCATCCTCTCATTCC
SMED30006083	CATTACCATCCCGCCAGCGTAGTTACATCACAACC	CCAATTCTACCCGCGTGCGAGAAATTCCTCAGTTG
SMED30011221	CATTACCATCCCGGGTACAACTTACTCCTGTGTTGG	CCAATTCTACCCGCGCCTGCTGTAGATTTCACTTC
SMED30010528	CATTACCATCCCGATCAAAAGCTGTTTACAATTTCAATTTC	CCAATTCTACCCGTCCACTCTGGTAAACGTAACCG
SMED30006065	CATTACCATCCCGGCCGCCTCATAGATTTGATGAC	CCAATTCTACCCGTATACGACACAGGAATCCTCGC
SMED30026394	CATTACCATCCCGTTAGTGTTTCGGTCCTCCAAGG	CCAATTCTACCCGTGCCTTGCTATTATGCAGATTTG
SMED30000902	CATTACCATCCCGCCGACACAAAATCCAAAGGAGG	CCAATTCTACCCGCACTTGATTCCTTCAGGCTTGC
SMED30032538	CATTACCATCCCGTTTTGTGTGCTGCTGTATTTGG	CCAATTCTACCCGTGACGCGAAATTTAAAATTTGAGG
SMED30024865	CATTACCATCCCGCGCAGTCAAAACTACGAAACAAG	CCAATTCTACCCGATTTAGCAAGGTTTCTAGGCCG
SMED30018353	CATTACCATCCCGGGATTTCCACCGGTTTTCTGTG	CCAATTCTACCCGAATTGACACGATGTAAGCAGTG
SMED30018924	CATTACCATCCCGCAACAAAATGGGTTCCG	CCAATTCTACCCGTCCTTCCTTGATTTCGG
SMED30006674	CATTACCATCCCGATATCTTGCATGCCGTC	CCAATTCTACCCGGTAGACCTGCAATCCTTGTC
SMED30027266	CCAATTCTACCCGAAGAGGTGATAAAGAGCGAC	CATTACCATCCCGGGACATGTGTAAAAAGTGGG
SMED30027942	CATTACCATCCCGGTGATGAGTTTCACCGATTC	CCAATTCTACCCGGAATCCGAATATTCCGCAAG
SMED30024165	CATTACCATCCCGATTAGCACCAGCAGCAAAG	CCAATTCTACCCGCTTCTTTAGTTTTCGGAGGG
SMED30002213	CATTACCATCCCGTAGTGATTCCCAAACCAGAC	CCAATTCTACCCGCTGTACAATCCGAATAAGGC
SMED30033476	CATTACCATCCCGCAAAGGAACTACAGTTTGGG	CCAATTCTACCCGGCGACACTTTTTAGTTCCAG
SMED30011793	CATTACCATCCCGCAAATGGTGACTGTGTCAAG	CCAATTCTACCCGCCATGAAGAATTAGAGCCAG
SMED30005873	CATTACCATCCCGGTTTCGTTGCTAATCCAGAC	CCAATTCTACCCGGACATATTCACCAATCAGGC
SMED30031507	CATTACCATCCCGTGACGCATTGGACTTAGAAC	CCAATTCTACCCGAGATTTCTTTGGTCTCCCTC
SMED30017236	CATTACCATCCCGAATGATGTCACCAAGACTCC	CCAATTCTACCCGCCTCTAAACTTTCATGTGGG
SMED30033686	CATTACCATCCCGTATTAGTGGTTCCTTGCAGC	CCAATTCTACCCGGTGTTCTTCTCACTTTTCGG
SMED30009017	CATTACCATCCCGCGTTATGGGATTTCTGGTG	CCAATTCTACCCGCAAAATGGCGAGTGCTAC
SMED30033179	CATTACCATCCCGCTGCTAGAACAAGATTTCCC	CCAATTCTACCCGCAAGCGTAAACACATCTGC
SMED30023307	CATTACCATCCCGAACTCTGTCCAGGAAAATCC	CCAATTCTACCCGTATTGTCAAGAACCCCTGAG
SMED30003947	CATTACCATCCCGGAAGCTGTTGAAGAGAATCG	CCAATTCTACCCGTTCTAGTTTCCCGTGACAAG
SMED30027243	CATTACCATCCCGGAAACTCGTTGATGGTGATG	CCAATTCTACCCGTGGAGATATTCCCTGTGTTC
SMED30001121	CATTACCATCCCGGTTCTCCTCAATTCCATCTG	CCAATTCTACCCGCATGGTCAAAAGCTAAGGAG
SMED30021059	CATTACCATCCCGCATGATACGTTACCACATCG	CCAATTCTACCCGCTTGTAATTCTTACACGGGG
SMED30023006	CATTACCATCCCGGCGTTAACAAAGGTTCAGTC	CCAATTCTACCCGAGTTGCCCGACATTACTAAG
SMED30030198	CATTACCATCCCGTCTGCAGTTTAAGTTAGGCG	CCAATTCTACCCGATTGGATAGAACCAGCACAC
SMED30011727	CATTACCATCCCGTCTGATTGGGAAAGTCACTC	CCAATTCTACCCGATCGTTTCAGTCATCACCTC
SMED30032823	CATTACCATCCCGTATGGAAGAGGTGATTGGTC	CCAATTCTACCCGAAGAGCTCGTTAAGTGCAAG
SMED30020865	CATTACCATCCCGATCACAATGAGGCTGACTTC	CCAATTCTACCCGGCATGAACATTCTTAGCCAG
SMED30000639	CATTACCATCCCGCCTCGGAGCAGTAAATACAC	CCAATTCTACCCGAGCAGTGCTACCTCTCAAAG
SMED30020797	CATTACCATCCCGCAGTTACATTTACCCGAAGC	CCAATTCTACCCGGGTGGACAAAACACTAATGG
SMED30021359	CATTACCATCCCGTACTGATGAGATGACGATCC	CCAATTCTACCCGACGTTCTTAAGTGGTTGTGC
SMED30012767	CATTACCATCCCGGCAATTATATACGTGAGCCC	CCAATTCTACCCGATTTACCAAGATCGTCCCAC
SMED30021960	CATTACCATCCCGCCTATTCCACAAAGAGTTCG	CCAATTCTACCCGAGTAAAGGCGCTATGAGATG
SMED30034490	CATTACCATCCCGGTCAGTTTCAGTGGGAACTC	CCAATTCTACCCGACACTTTCCAGTTGGTTGAC
SMED30001471	CATTACCATCCCGAACTTACCGATTGTCAGAGG	CCAATTCTACCCGATCACTGGGAGAAGTGATTG
SMED30003172	CATTACCATCCCGGAAAAGGCAAGCTTGTAGAC	CCAATTCTACCCGACTGCACACTGCAAAACTG
SMED30004606	CATTACCATCCCGGTGCTTAATTTGACCTCTGC	CCAATTCTACCCGACTTAGTGGGGCCCTTATAC
SMED30005508	CATTACCATCCCGGTTCAGCCGCTAATTATCAC	CCAATTCTACCCGTCAATGTTGGAGTAAGGAGG
SMED30008855	CATTACCATCCCGACCTGATAATGGCATCTGAC	CCAATTCTACCCGGCTAAAATATGTGAGTGGGG
SMED30009513	CATTACCATCCCGCAAATAAGCGTAACAGTCCC	CCAATTCTACCCGGGTCCAAGCGTTCTAAGAG
SMED30010986	CATTACCATCCCGAAGAAGCTAATGTCGTGTGC	CCAATTCTACCCGGCACTAGGAAGTCAGGATTG
SMED30011140	CATTACCATCCCGAGTGGAGGACTTGACACATC	CCAATTCTACCCGCATCGGTAGGTTCGTATTTC
SMED30013319	CATTACCATCCCGTTAGGACTCGATGTGAAAGC	CCAATTCTACCCGATCTCTCGGAAGTAAGGACC
SMED30014639	CATTACCATCCCGGTCTTTGATTTGAGTGTCGG	CCAATTCTACCCGGAAAATGACCTCTACAACGG
SMED30016382	CATTACCATCCCGCTTTATCTGCCTTCAAGCAC	CCAATTCTACCCGTGGTCTTTAGCTTCTTCAGC
SMED30016464	CATTACCATCCCGTAACATTCTAGGCCCTCCTC	CCAATTCTACCCGGTTTTGAGAAGGAGTGATGC
SMED30018252	CATTACCATCCCGCTCAAGACGACTTATTTGGG	CCAATTCTACCCGTAGACCAAAGGATAGCTTGC
SMED30019154	CATTACCATCCCGTTGACTACCACGCATAAACC	CCAATTCTACCCGCTCTATAAACACTCGACCCG
SMED30019697	CATTACCATCCCGAGGGATGCTTCTTAACCTTC	CCAATTCTACCCGCCAGGATTATGTTCTCCAAG
SMED30019743	CATTACCATCCCGTTCTACCTAAACTGCGTTGG	CCAATTCTACCCGCCCGAAGATAATCCTCAAAC
SMED30020710	CATTACCATCCCGTAATTCCGAATGGGTCG	CCAATTCTACCCGAATCCCCAGTCATAAAGACC
SMED30021752	CATTACCATCCCGTTCTCCTCAAAGTTCTCCG	CCAATTCTACCCGCTAATGAGACCTTCATTGCC
SMED30024934	CATTACCATCCCGGTGTTGGGTGCAATAATAGG	CCAATTCTACCCGTAACACATATTTGGGCCTCG
SMED30026414	CATTACCATCCCGCTCGTCTGTGGAGGAGTAAG	CCAATTCTACCCGGACTTTATGCCACCTTTCAC
SMED30027034	CATTACCATCCCGAGGAACATTTGGAGTGTGTC	CCAATTCTACCCGCGTTTACCGAATATGCACTC
SMED30027296	CATTACCATCCCGATTCAATCAGTGTACCAGGG	CCAATTCTACCCGCAGTGTGACCATTACTGACG
SMED30029098	CATTACCATCCCGTACGACAGTGTGGATGAGTG	CCAATTCTACCCGTTAGTCACCGAGATTTCGTC
SMED30030292	CATTACCATCCCGGAAAGATTAAGGCTTCCACC	CCAATTCTACCCGACACATTCTGACTCCCATTC
SMED30030642	CATTACCATCCCGTATCAGCGACAGAAAGATCC	CCAATTCTACCCGCAACTACGTTTTCCTATGCC
SMED30030679	CATTACCATCCCGACTCATGGAGGCACTAATTG	CCAATTCTACCCGCTGGGTCATGTATCTTTTCC
SMED30031568	CATTACCATCCCGACACCTACCTTTTGAACTCC	CCAATTCTACCCGGGAATGTCATATTCACCGAC
SMED30032169	CATTACCATCCCGCAGAATCCAAGTTTGGTAGG	CCAATTCTACCCGCAACTAGGACCCTCTCTGTG
SMED30014019	CATTACCATCCCGCTGATCAACGTTCTGTGATG	CCAATTCTACCCGGCTATGCCATTTAAGCCAC
SMED30003449	CATTACCATCCCGCTGTTCCATTATTCGGAGTC	CCAATTCTACCCGAATAACCTCACCAAGACAGG
SMED30004747	CATTACCATCCCGTCGGTCTCCTGTTGAGTTAC	CCAATTCTACCCGATTCGTCTTCTTGTGGTCAG
SMED30019040	CATTACCATCCCGCAAATACAACATCCCTGGTC	CCAATTCTACCCGCAATACAGTTTCTTGGACCG
SMED30026757	CATTACCATCCCGCAAATGTGACCTTTCACCTG	CCAATTCTACCCGCTCCCAATAATCTCACCAAG
SMED30028574	CATTACCATCCCGTTGTAACTGTGCTCACTTCG	CCAATTCTACCCGCTAATGAGACCTTCATTGCC
SMED30003809	CATTACCATCCCGGAATCGTGTGCTAGTAGCTG	CCAATTCTACCCGAGTCTACTGACAATGCCGAC
SMED30033916	CATTACCATCCCGGAGGCAACAACTCCAAATAC	CCAATTCTACCCGTCTGAACATCCCCAGAATAG
SMED30032112	CATTACCATCCCGGAAACACCGGTAATTGAGTC	CCAATTCTACCCGCCCAATACTGAAAAGTCACC
SMED30029873	CATTACCATCCCCAAATGTGCCATGTGTAGGG	CCAATTCTACCCGTATTCGGGATTTTGAACG
SMED30035250	CATTACCATCCCGCACACACAACTAAATGGACG	CCAATTCTACCCGCATCGTTTATATCGTCCGAG
