# Supplementary figures and images for: Egr-5 is a post-mitotic regulator of planarian epidermal differentiation
Source: eLife journal article supplement (doi:10.7554/elife.10501), 2015-10-12

Figure 1- figure supplement 1.

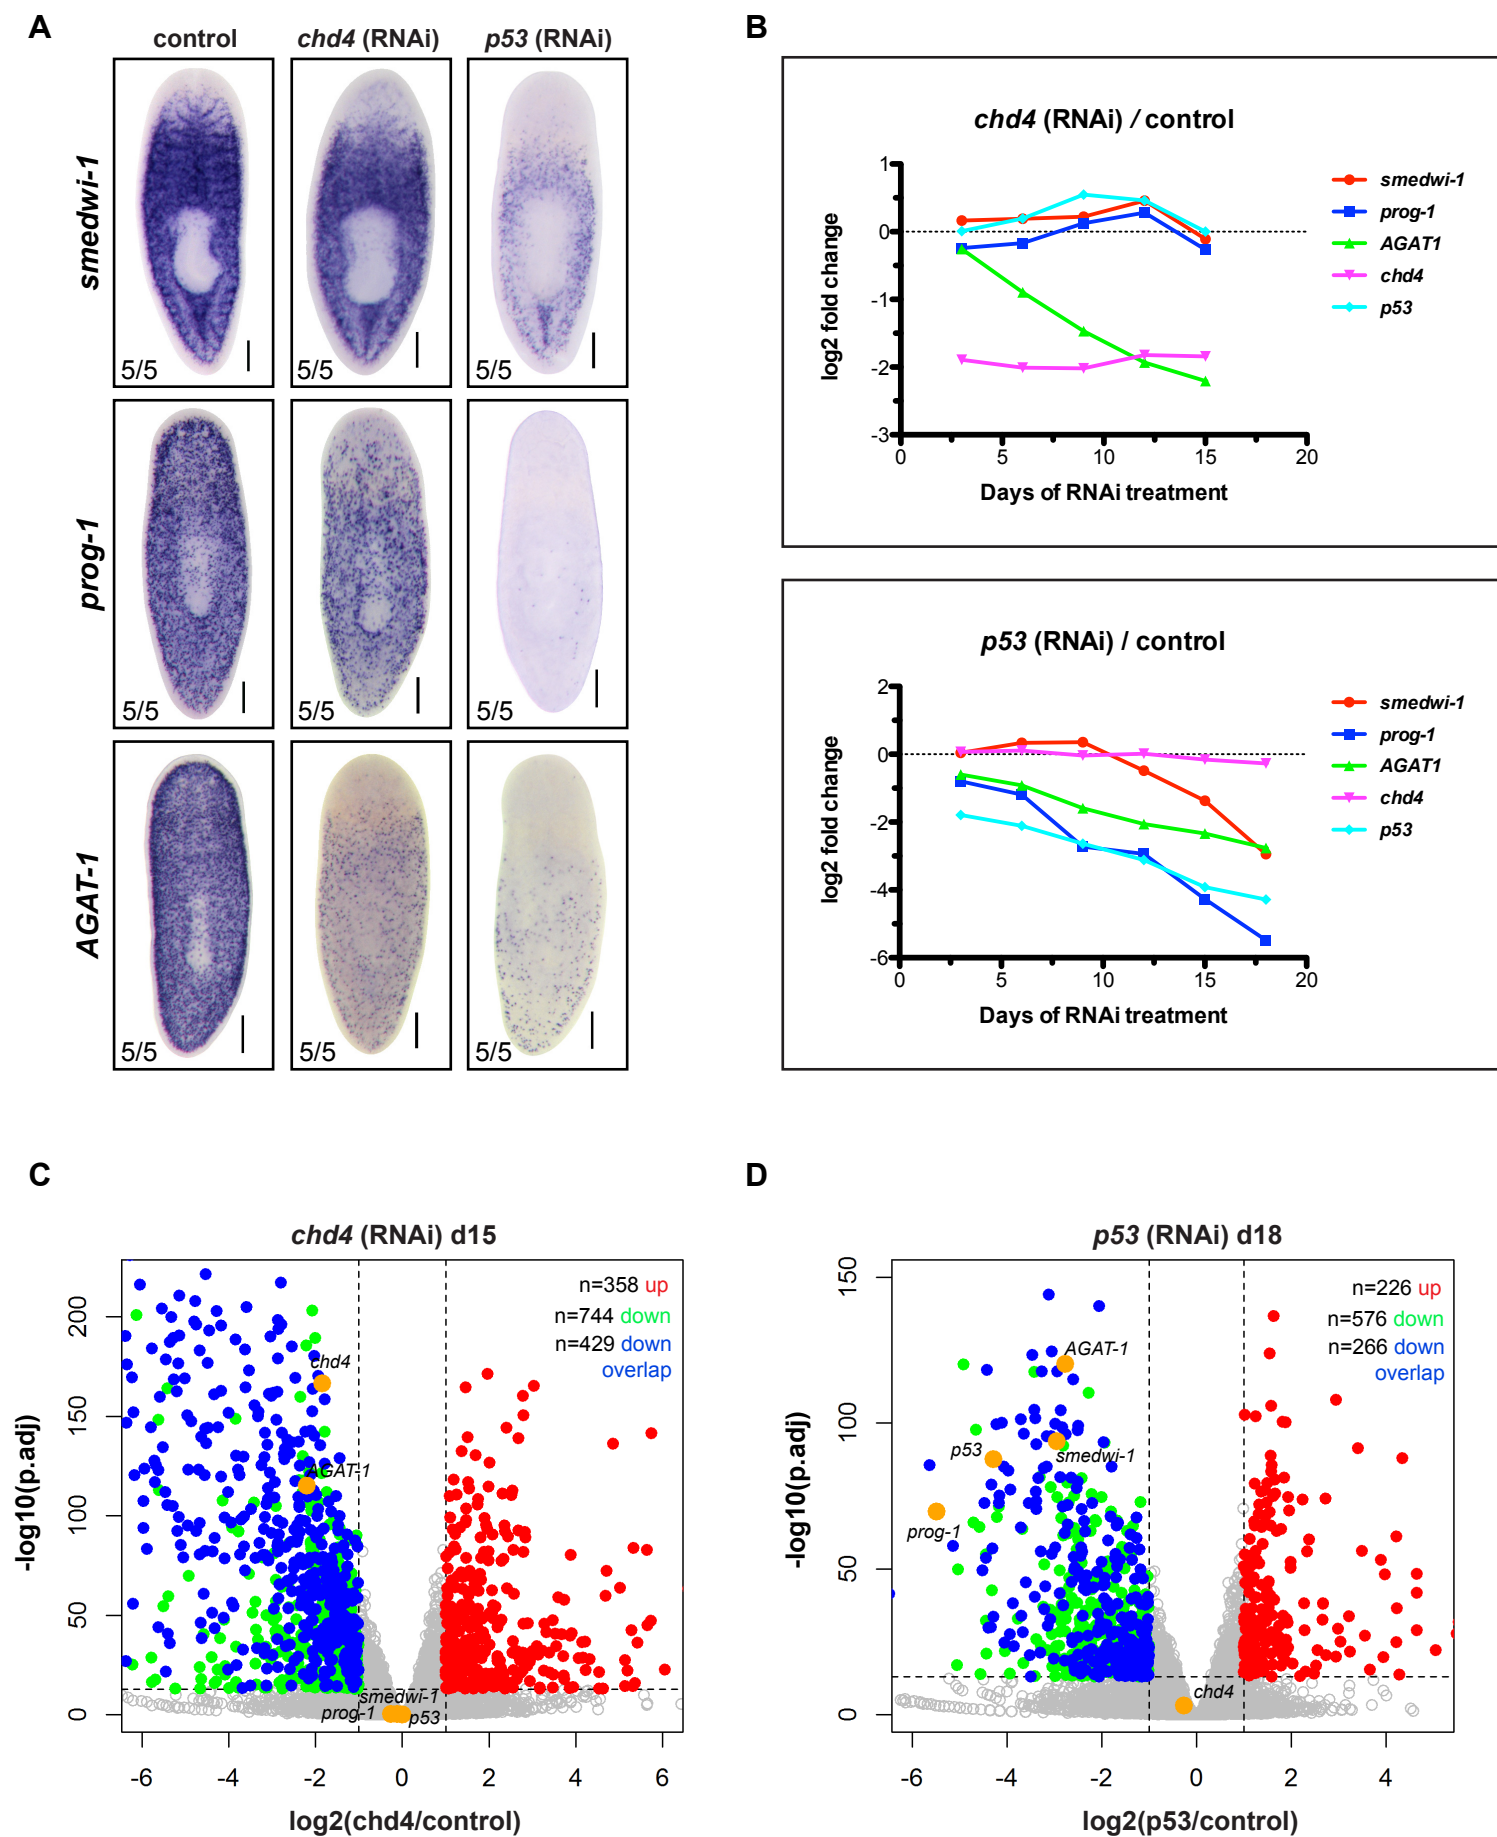

Supplement: supp [file elife_poa_e10501_Figure_1_figure_supplement_1.pdf › elife_poa_e10501_Figure_1_figure_supplement_1.pdf]

Figure 2 - figure supplement 1.

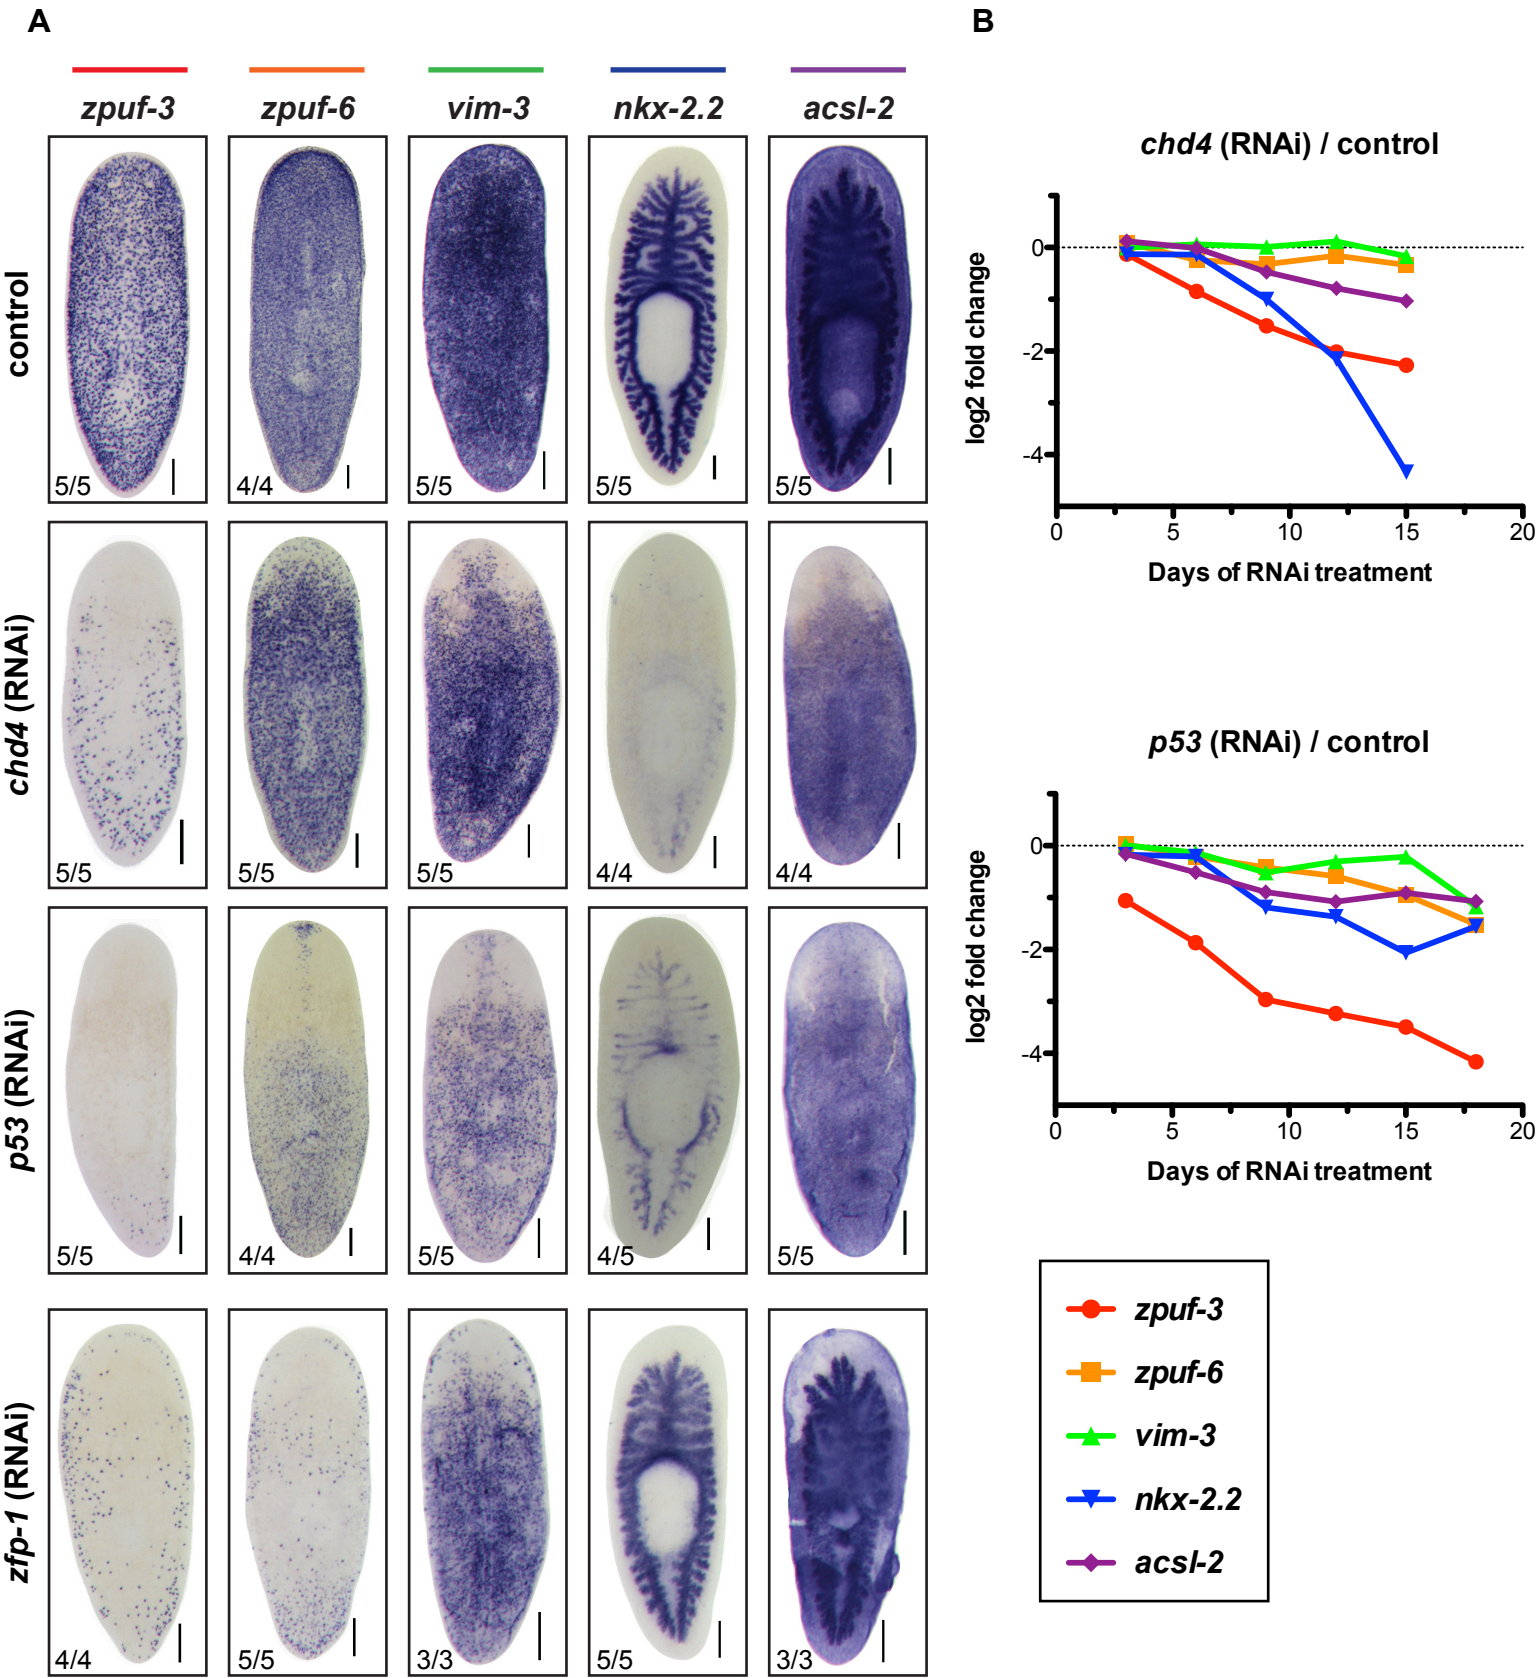

Supplement: supp [file elife_poa_e10501_Figure_2_figure_supplement_1.pdf › elife_poa_e10501_Figure_2_figure_supplement_1.pdf]

Figure 2- figure supplement 2.

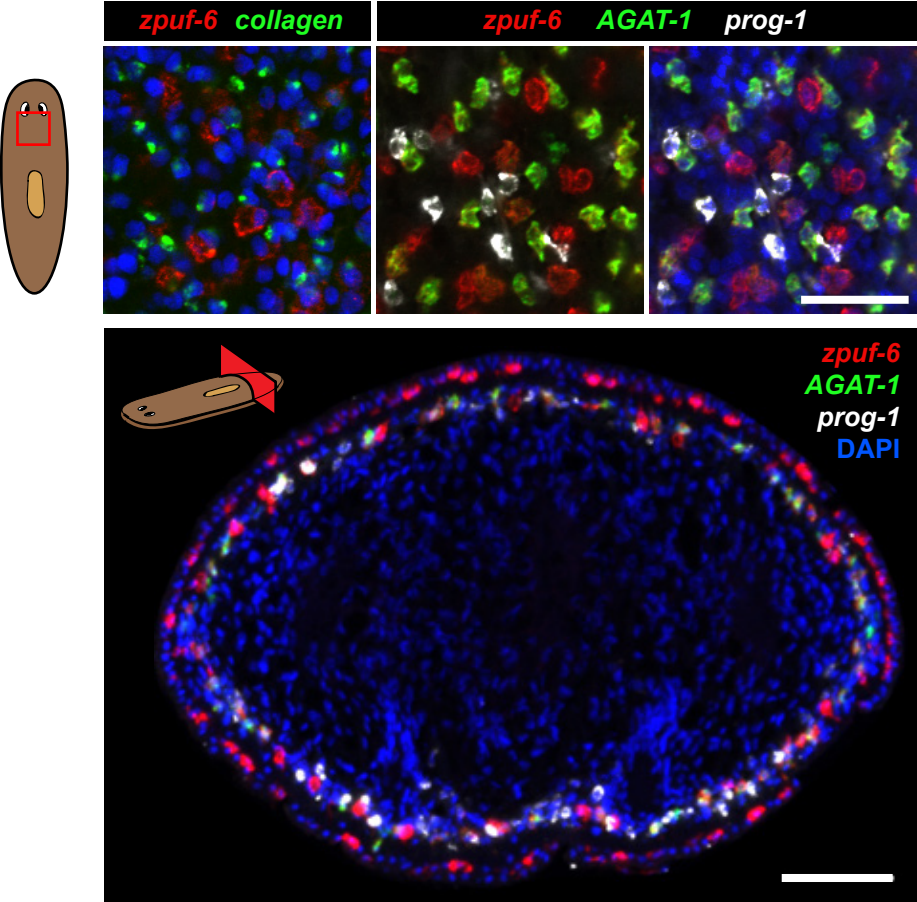

Supplement: supp [file elife_poa_e10501_Figure_2_figure_supplement_2.pdf › elife_poa_e10501_Figure_2_figure_supplement_2.pdf]

Figure 2 - figure supplement 3.

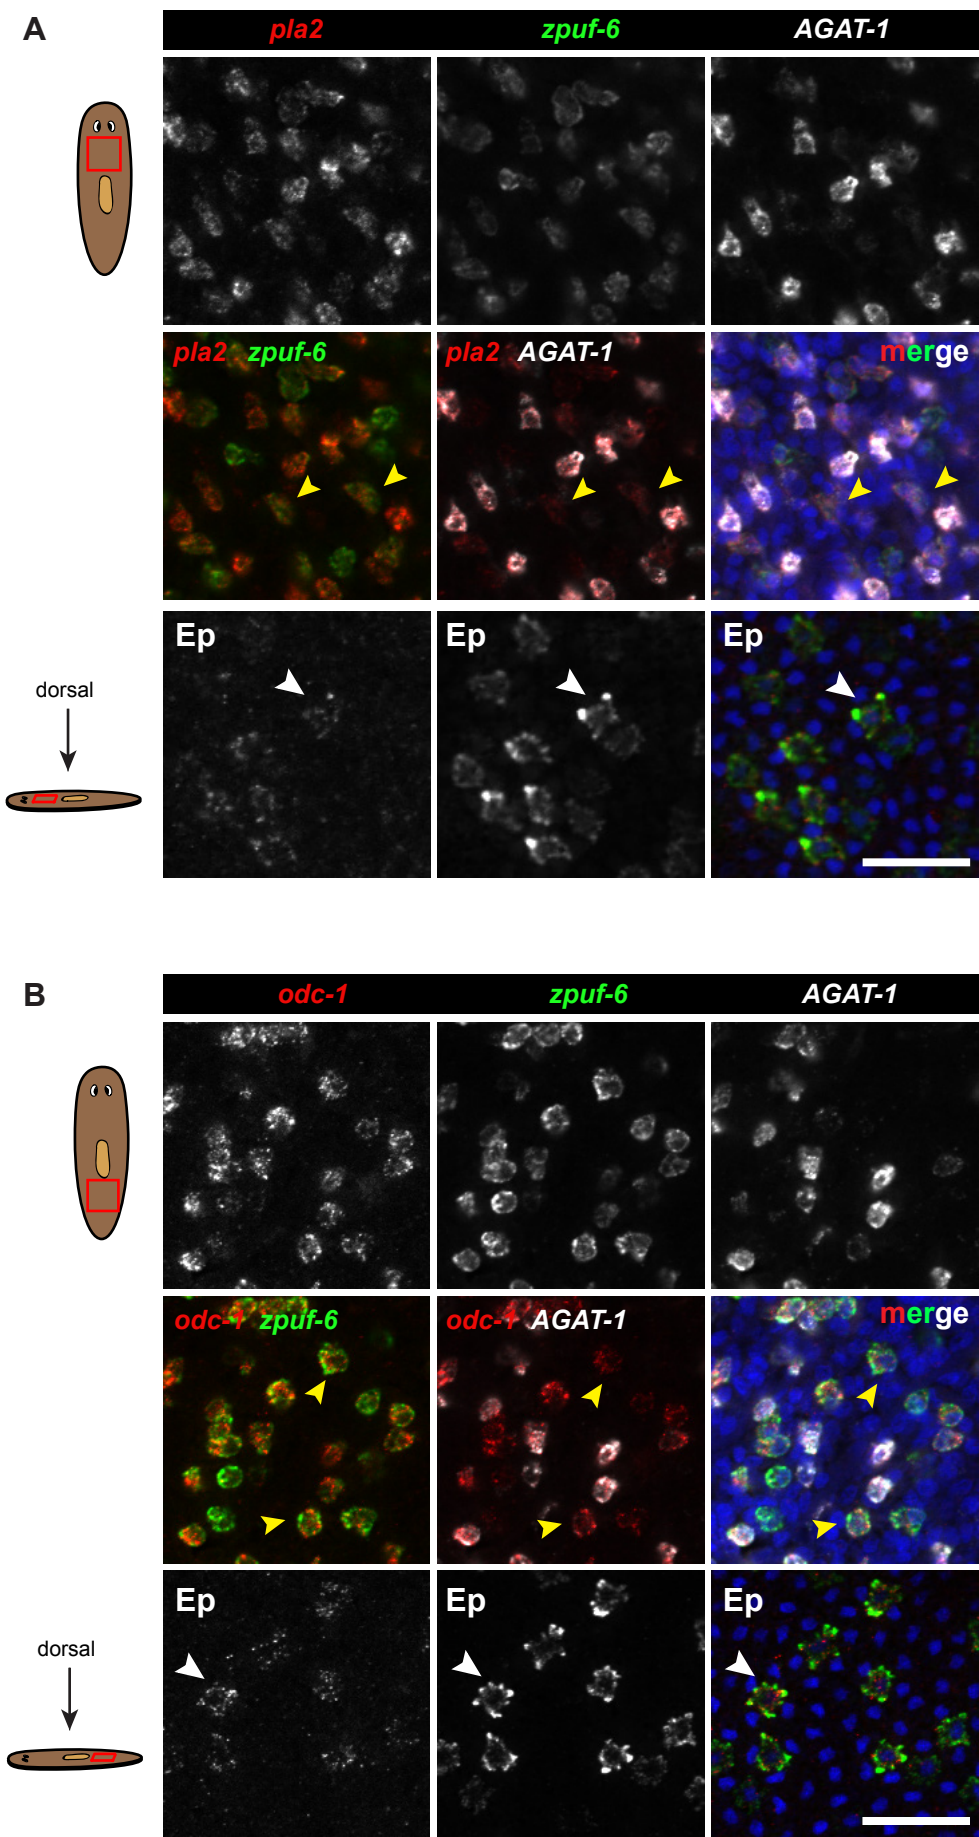

Supplement: supp [file elife_poa_e10501_Figure_2_figure_supplement_3.pdf › elife_poa_e10501_Figure_2_figure_supplement_3.pdf]

Figure 3 - figure supplement 1.

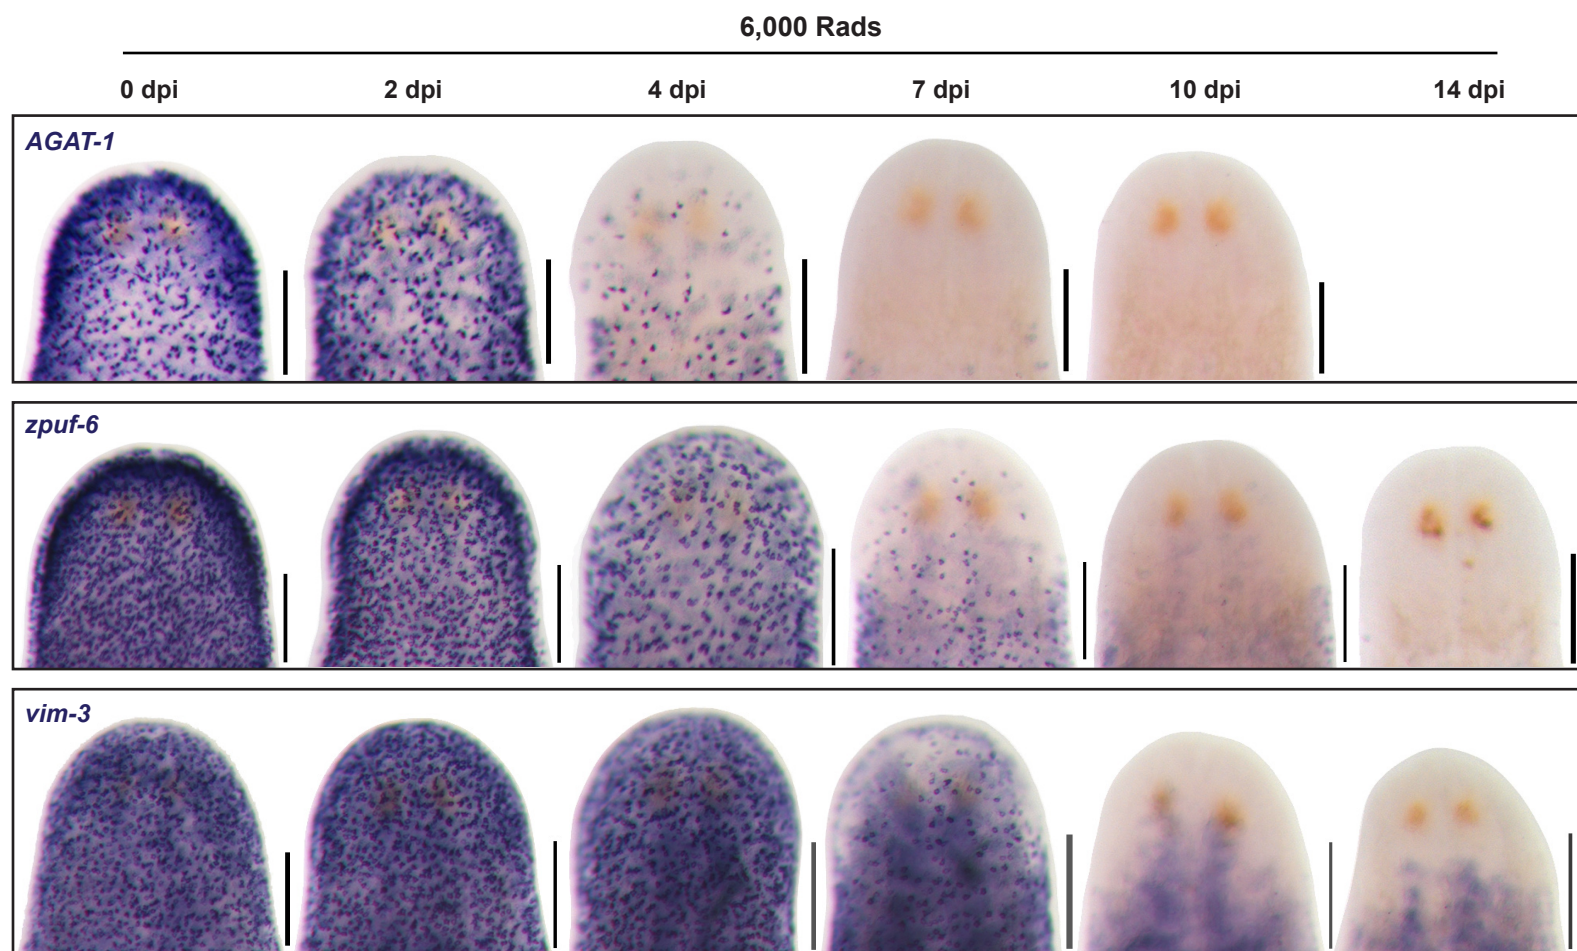

Supplement: supp [file elife_poa_e10501_Figure_3_figure_supplement_1.pdf › elife_poa_e10501_Figure_3_figure_supplement_1.pdf]

Figure 3 - figure supplement 2.

A

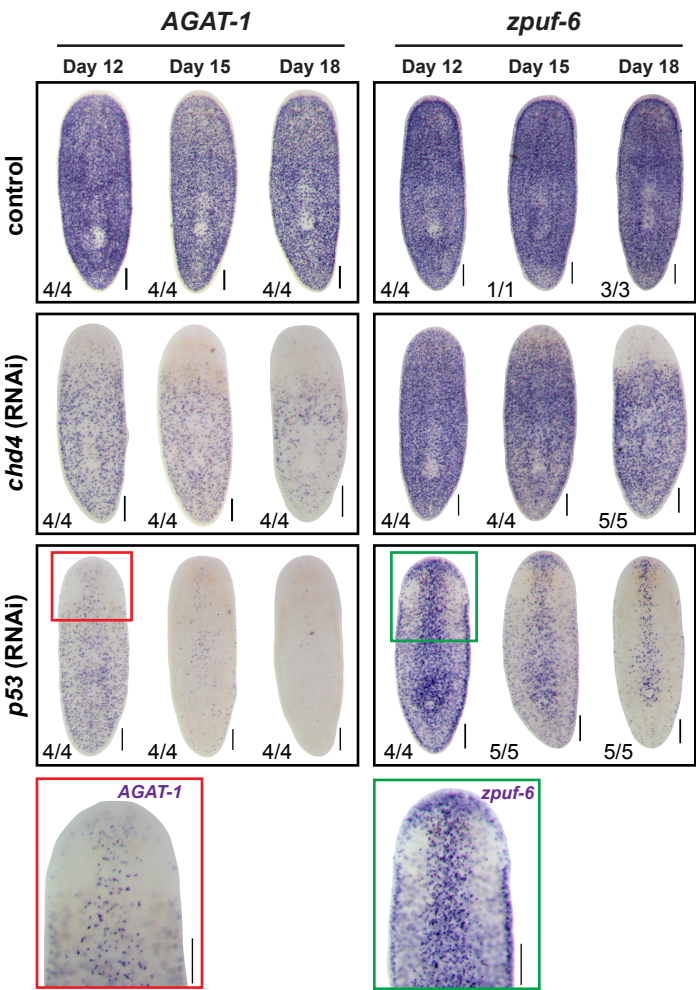

B

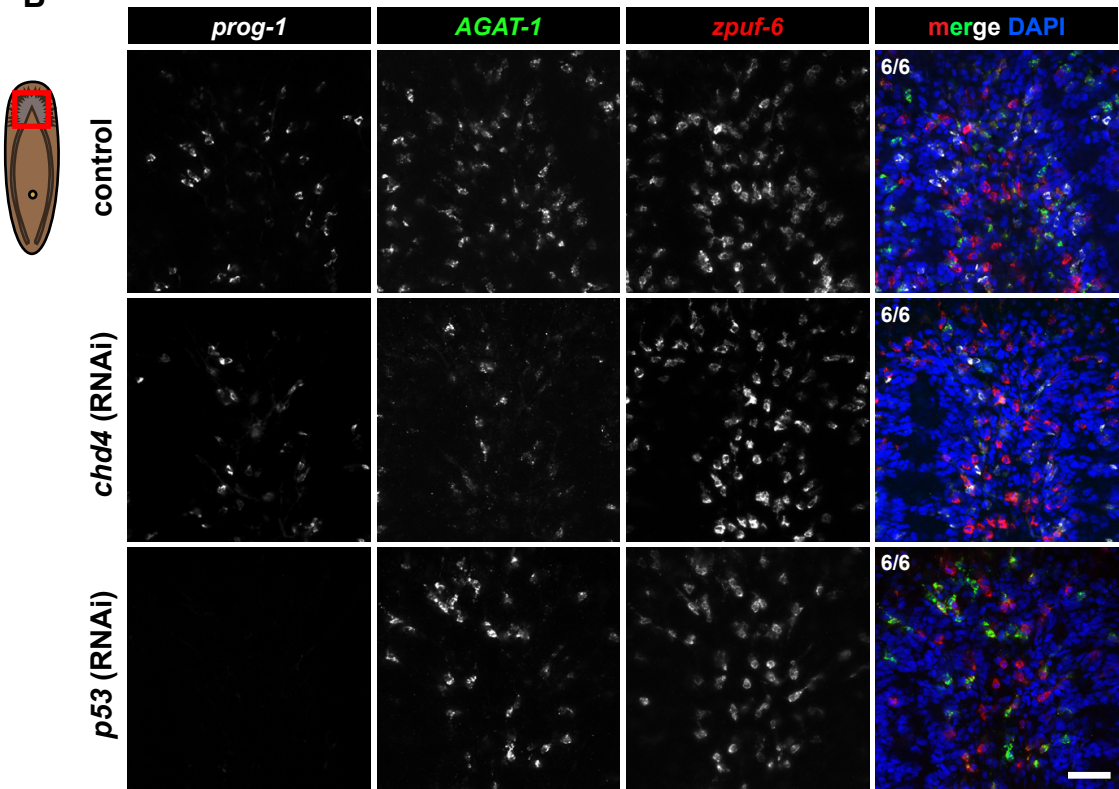

Supplement: supp [file elife_poa_e10501_Figure_3_figure_supplement_2.pdf › elife_poa_e10501_Figure_3_figure_supplement_2.pdf]

Figure 4 - figure supplement 1.

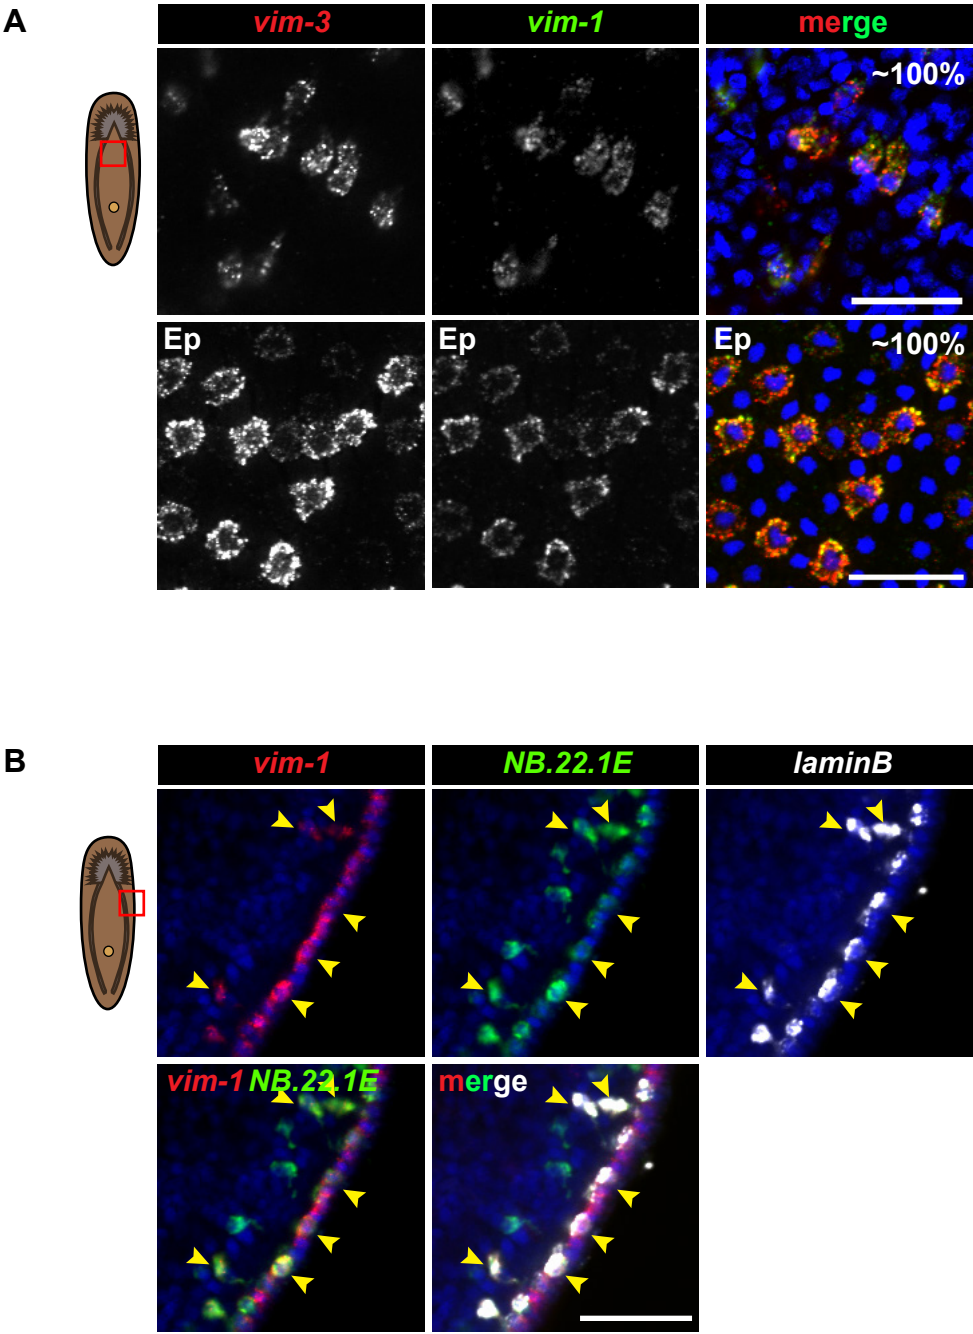

Supplement: supp [file elife_poa_e10501_Figure_4_figure_supplement_1.pdf › elife_poa_e10501_Figure_4_figure_supplement_1.pdf]

Figure 4 - figure supplement 2.

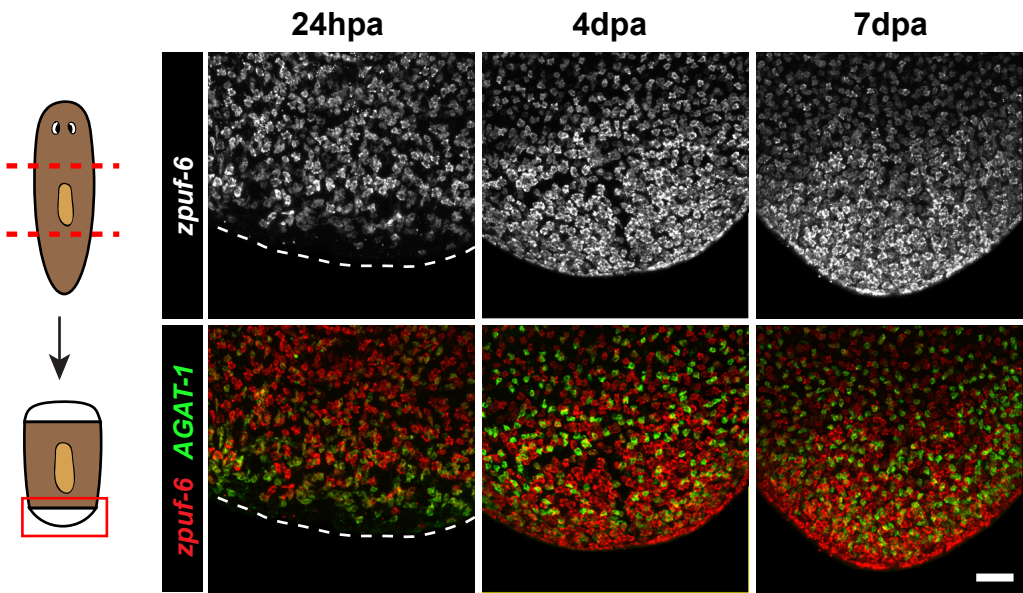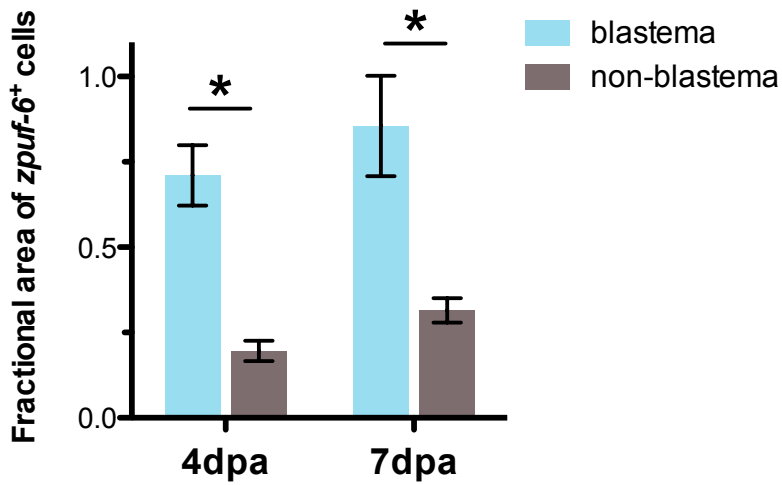

Supplement: supp [file elife_poa_e10501_Figure_4_figure_supplement_2.pdf › elife_poa_e10501_Figure_4_figure_supplement_2.pdf]

Figure 4 - figure supplement 3.

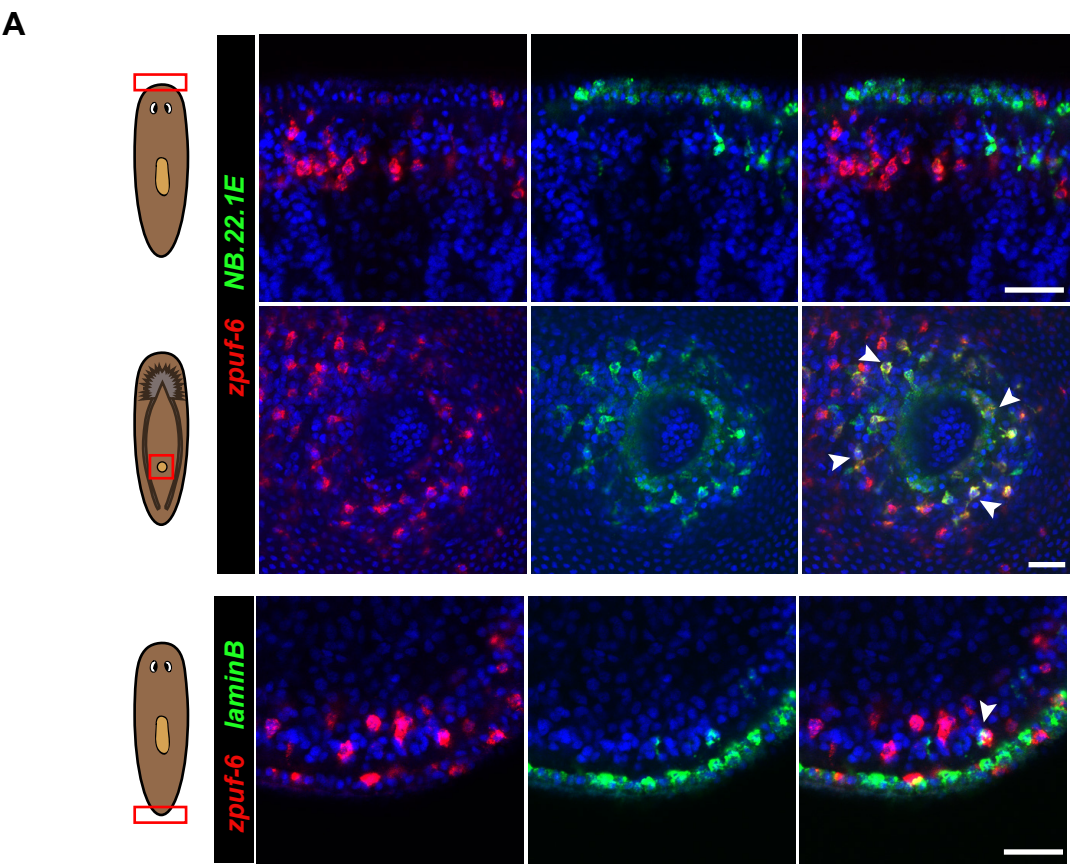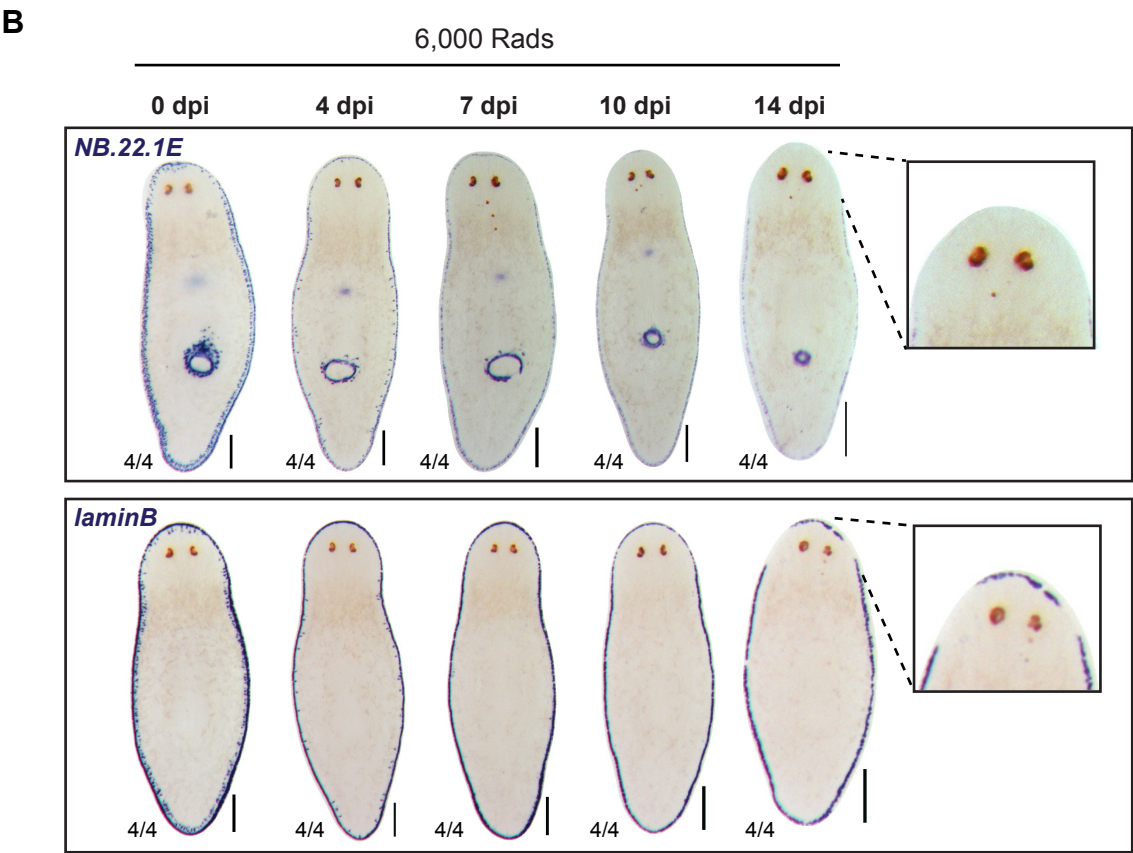

Supplement: supp [file elife_poa_e10501_Figure_4_figure_supplement_3.pdf › elife_poa_e10501_Figure_4_figure_supplement_3.pdf]

Figure 5 - figure supplement 1.

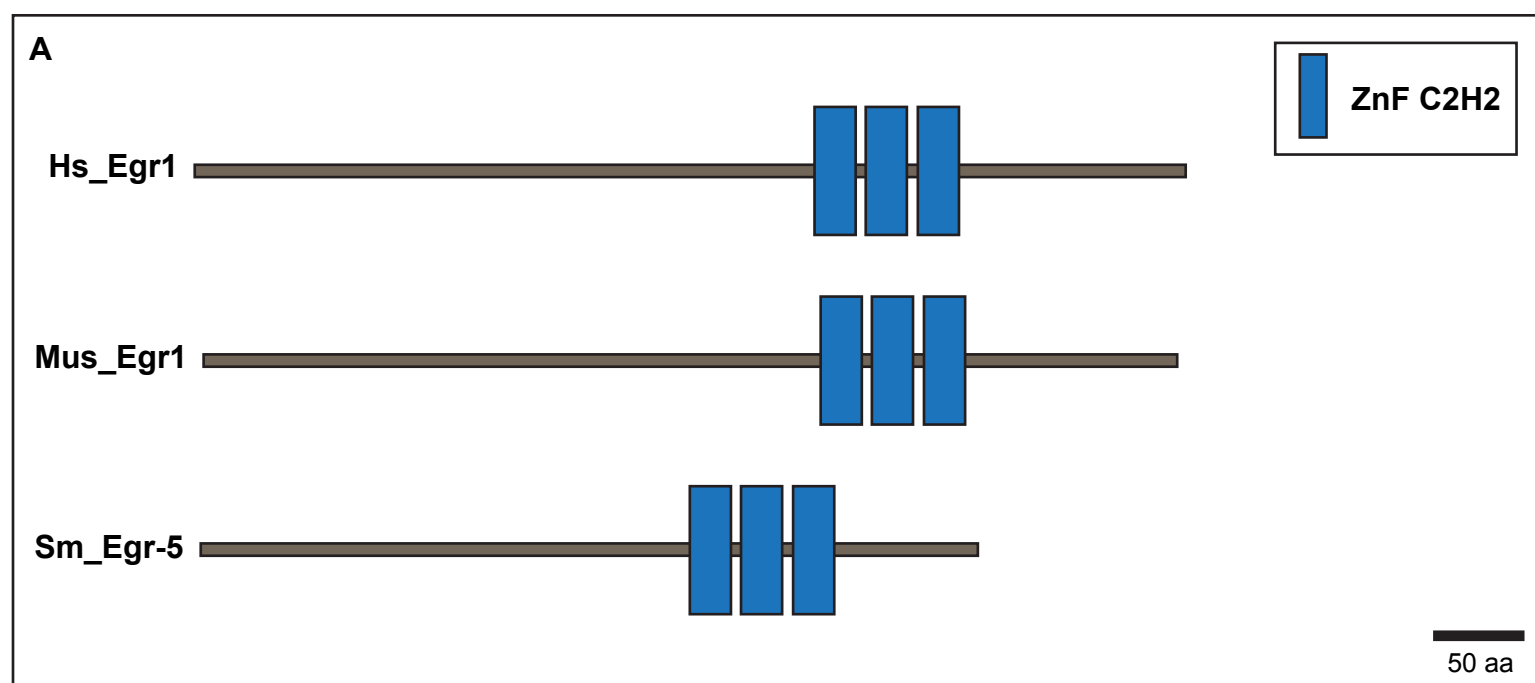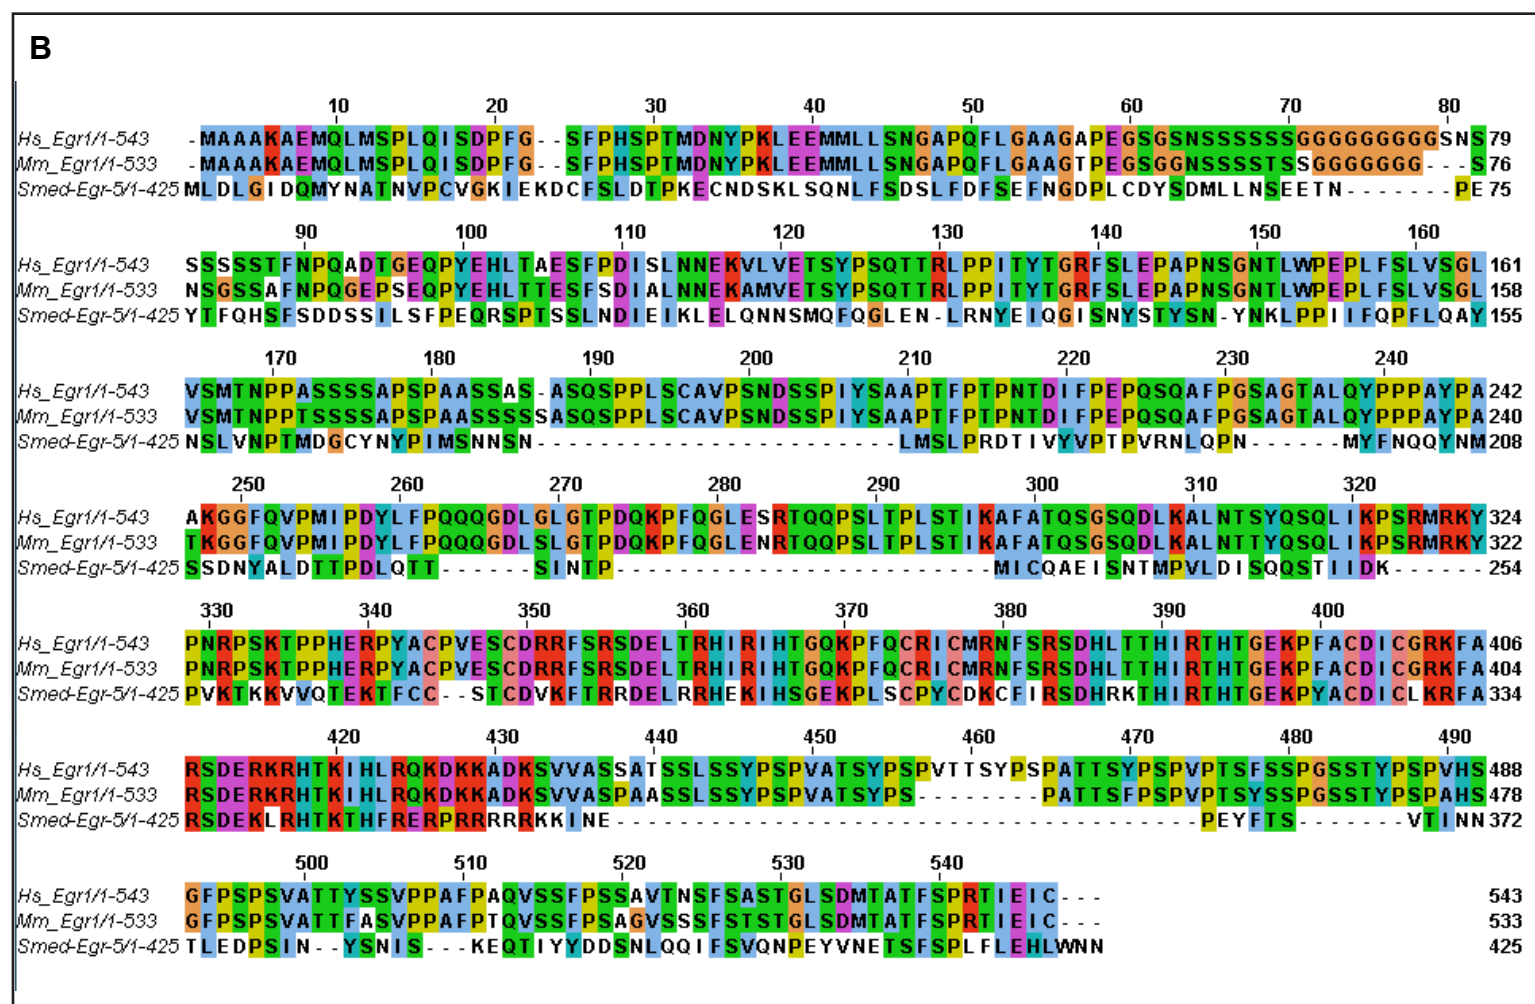

Supplement: supp [file elife_poa_e10501_Figure_5_figure_supplement_1.pdf › elife_poa_e10501_Figure_5_figure_supplement_1.pdf]

Figure 5 - figure supplement 2.

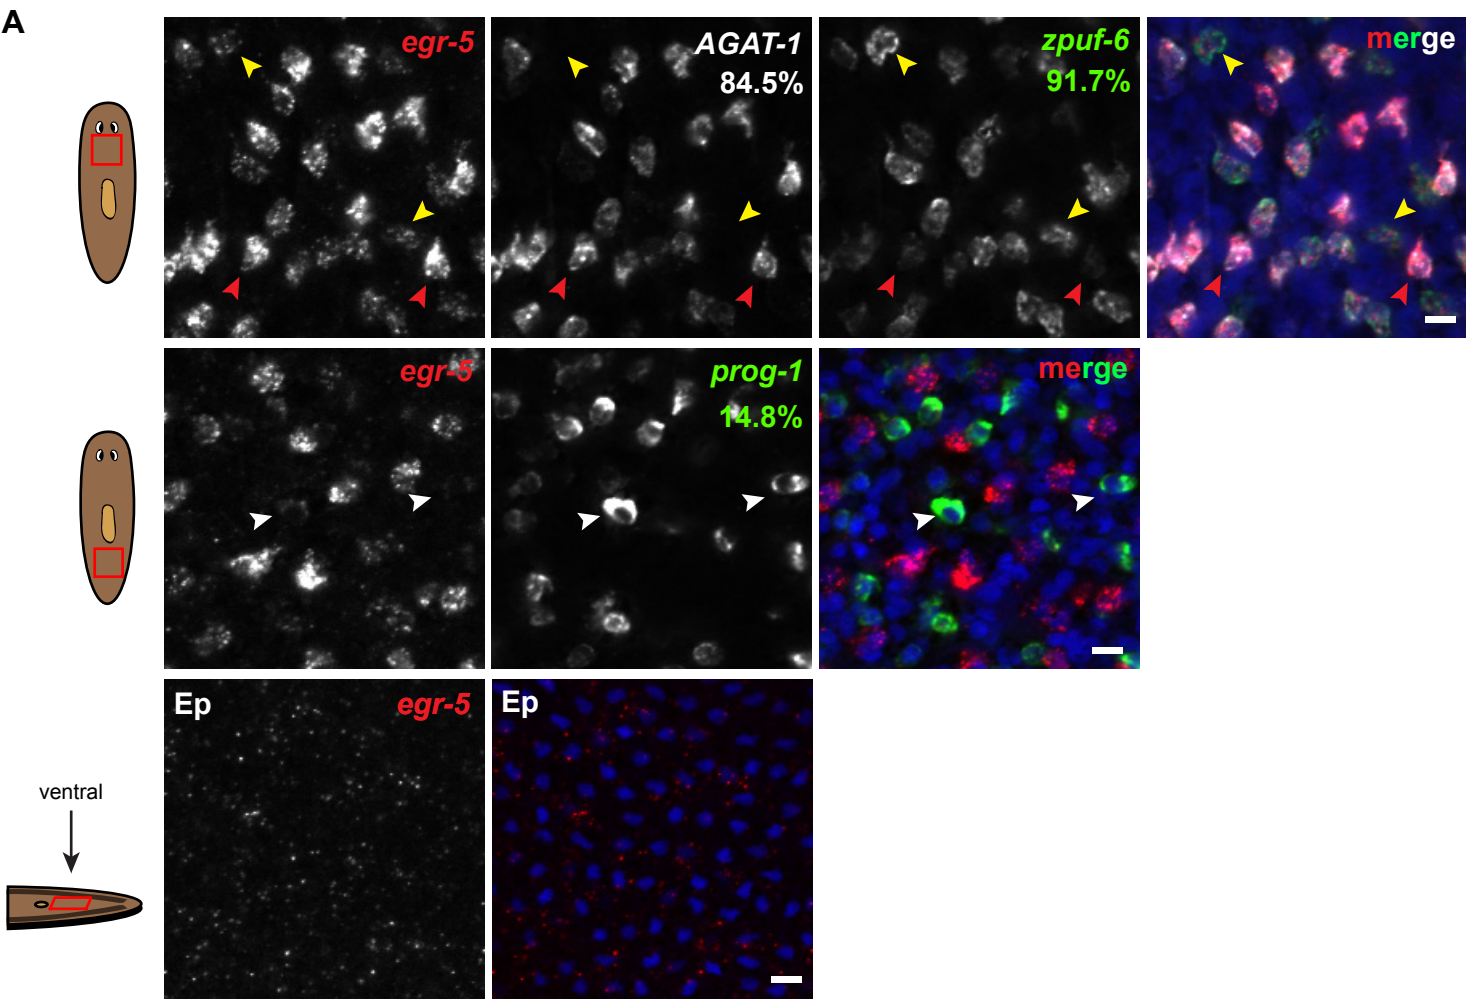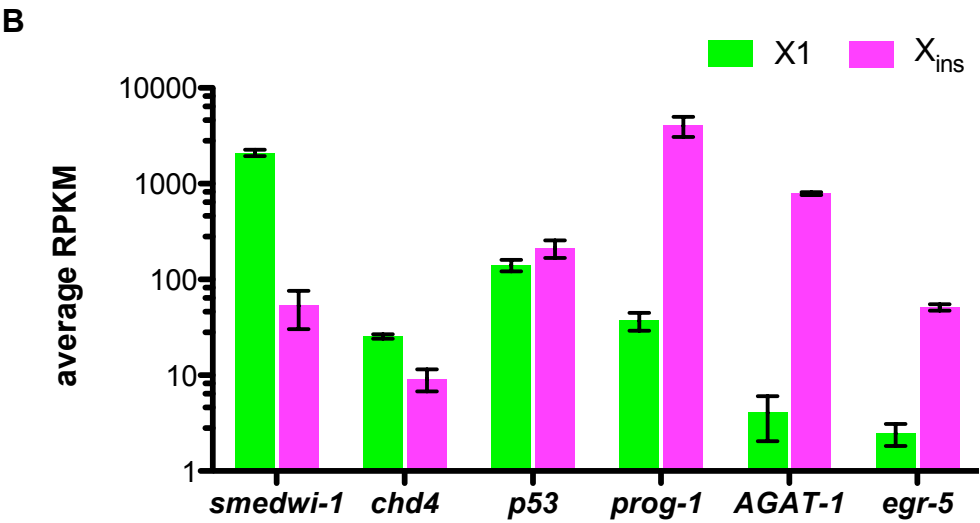

Supplement: supp [file elife_poa_e10501_Figure_5_figure_supplement_2.pdf › elife_poa_e10501_Figure_5_figure_supplement_2.pdf]

Figure 5 - figure supplement 3.

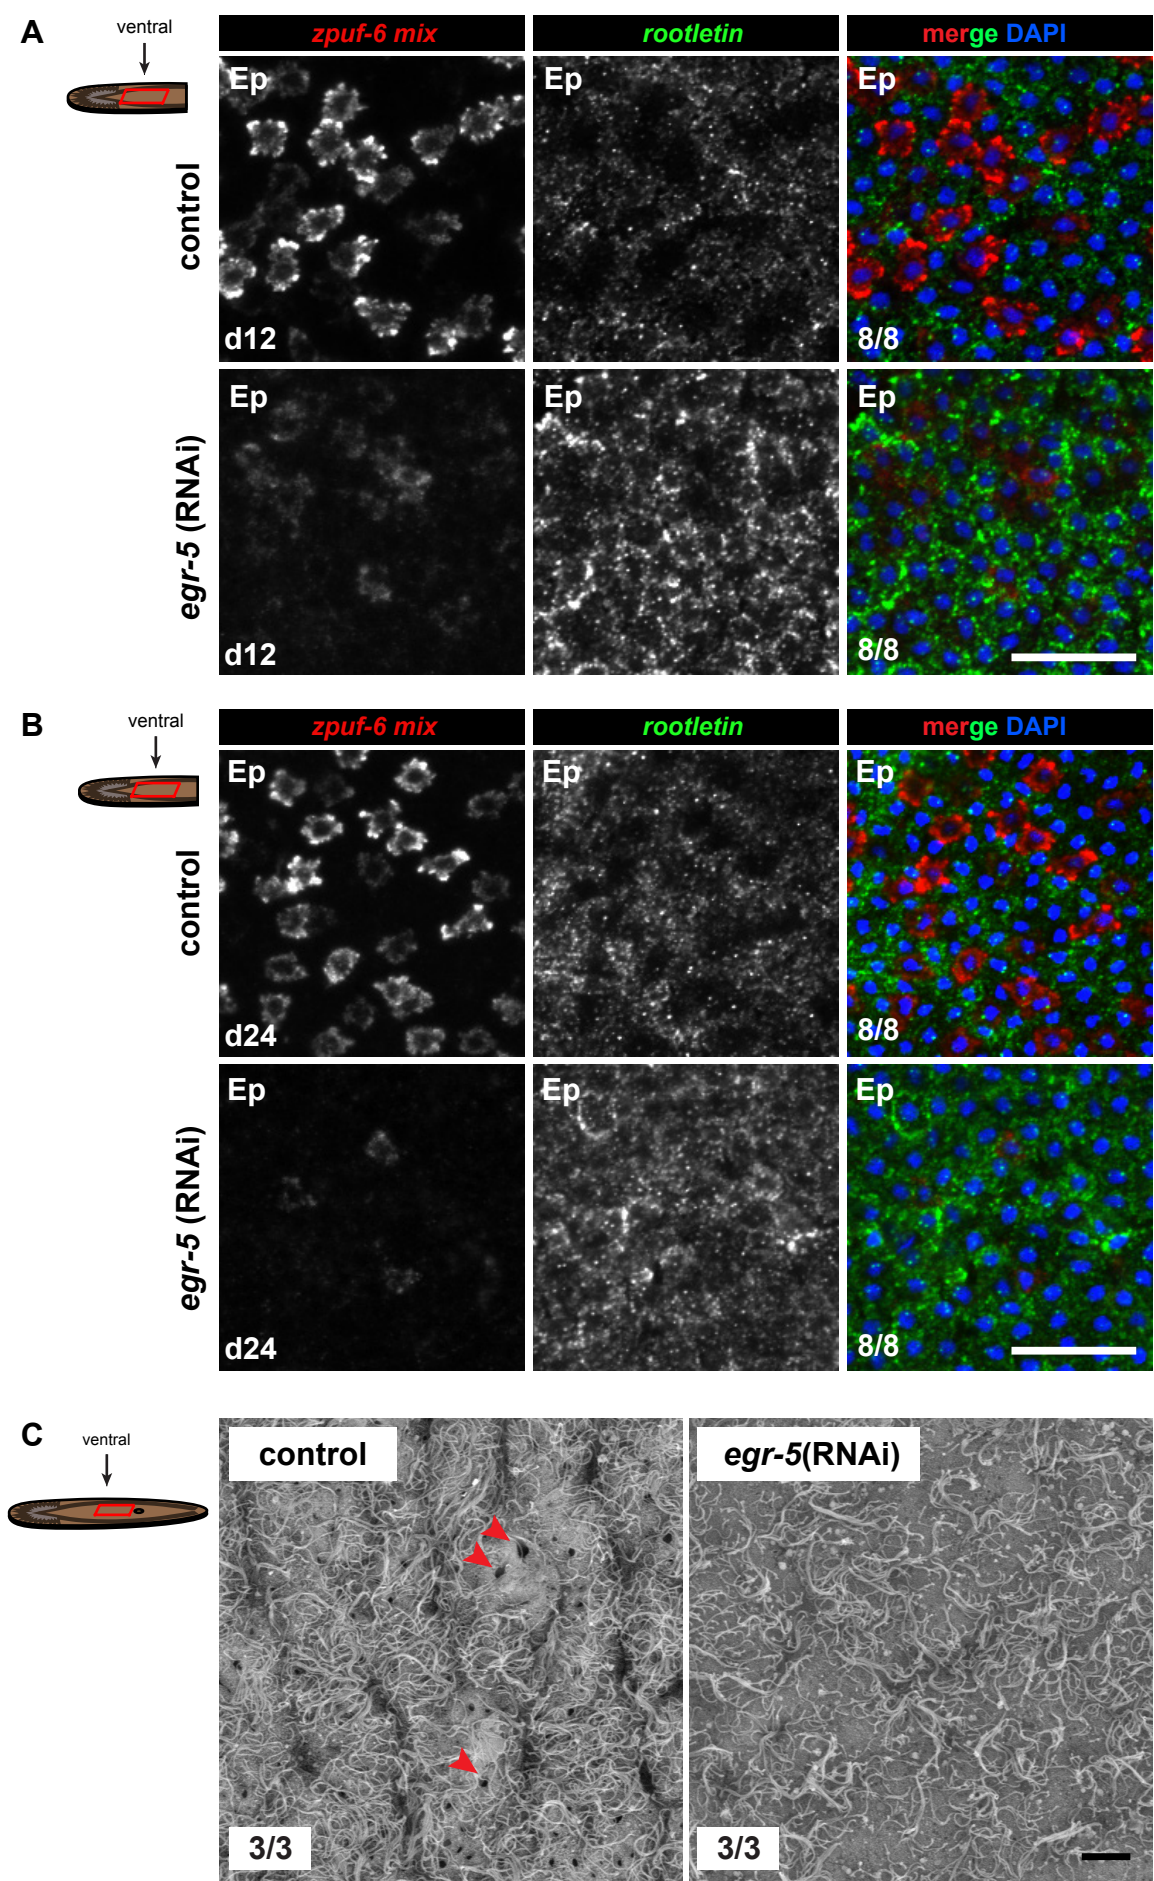

Supplement: supp [file elife_poa_e10501_Figure_5_figure_supplement_3.pdf › elife_poa_e10501_Figure_5_figure_supplement_3.pdf]

Figure 5 - figure supplement 4.

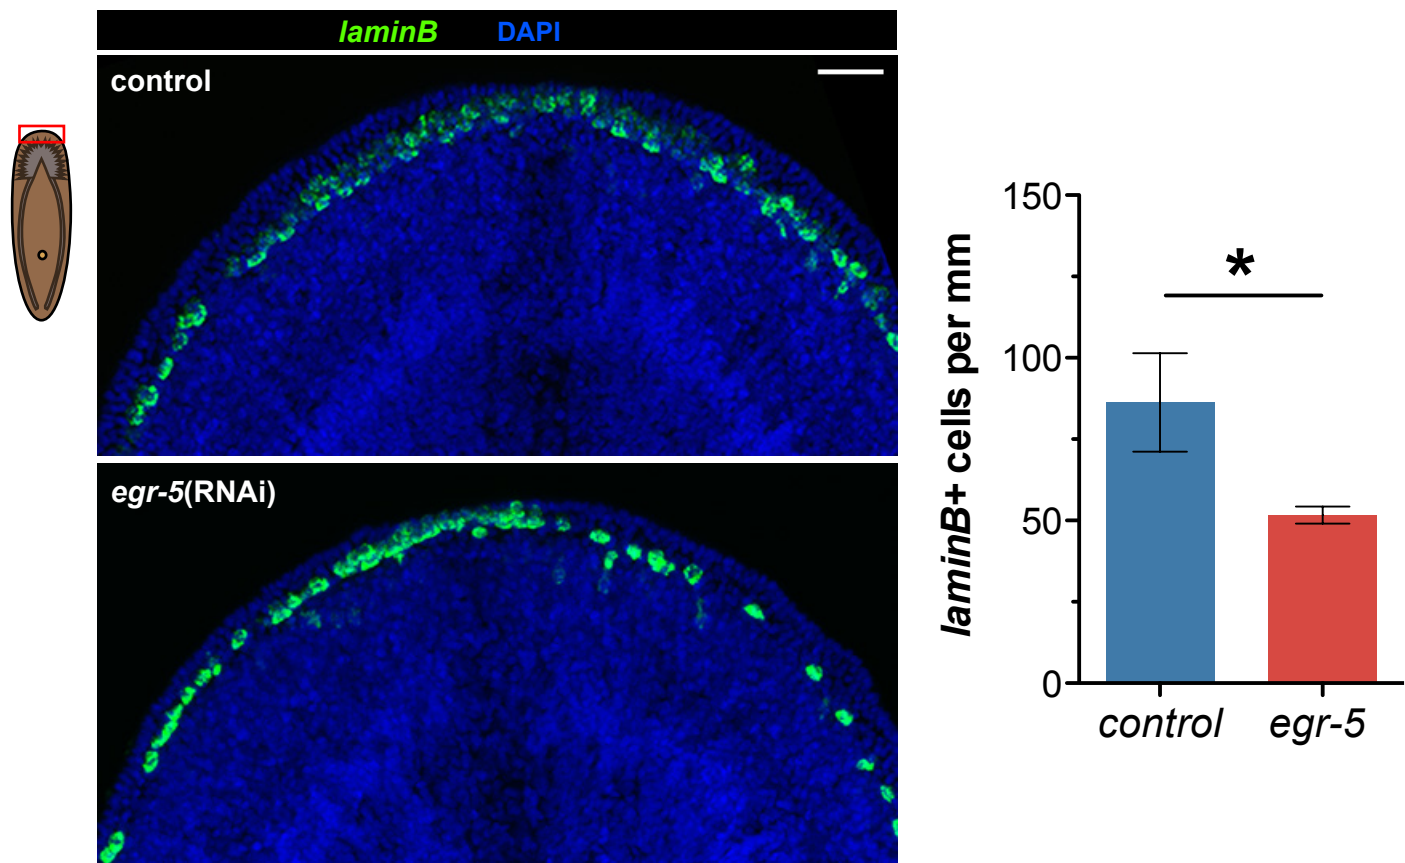

Supplement: supp [file elife_poa_e10501_Figure_5_figure_supplement_4.pdf › elife_poa_e10501_Figure_5_figure_supplement_4.pdf]

Figure 6- figure supplement 1.

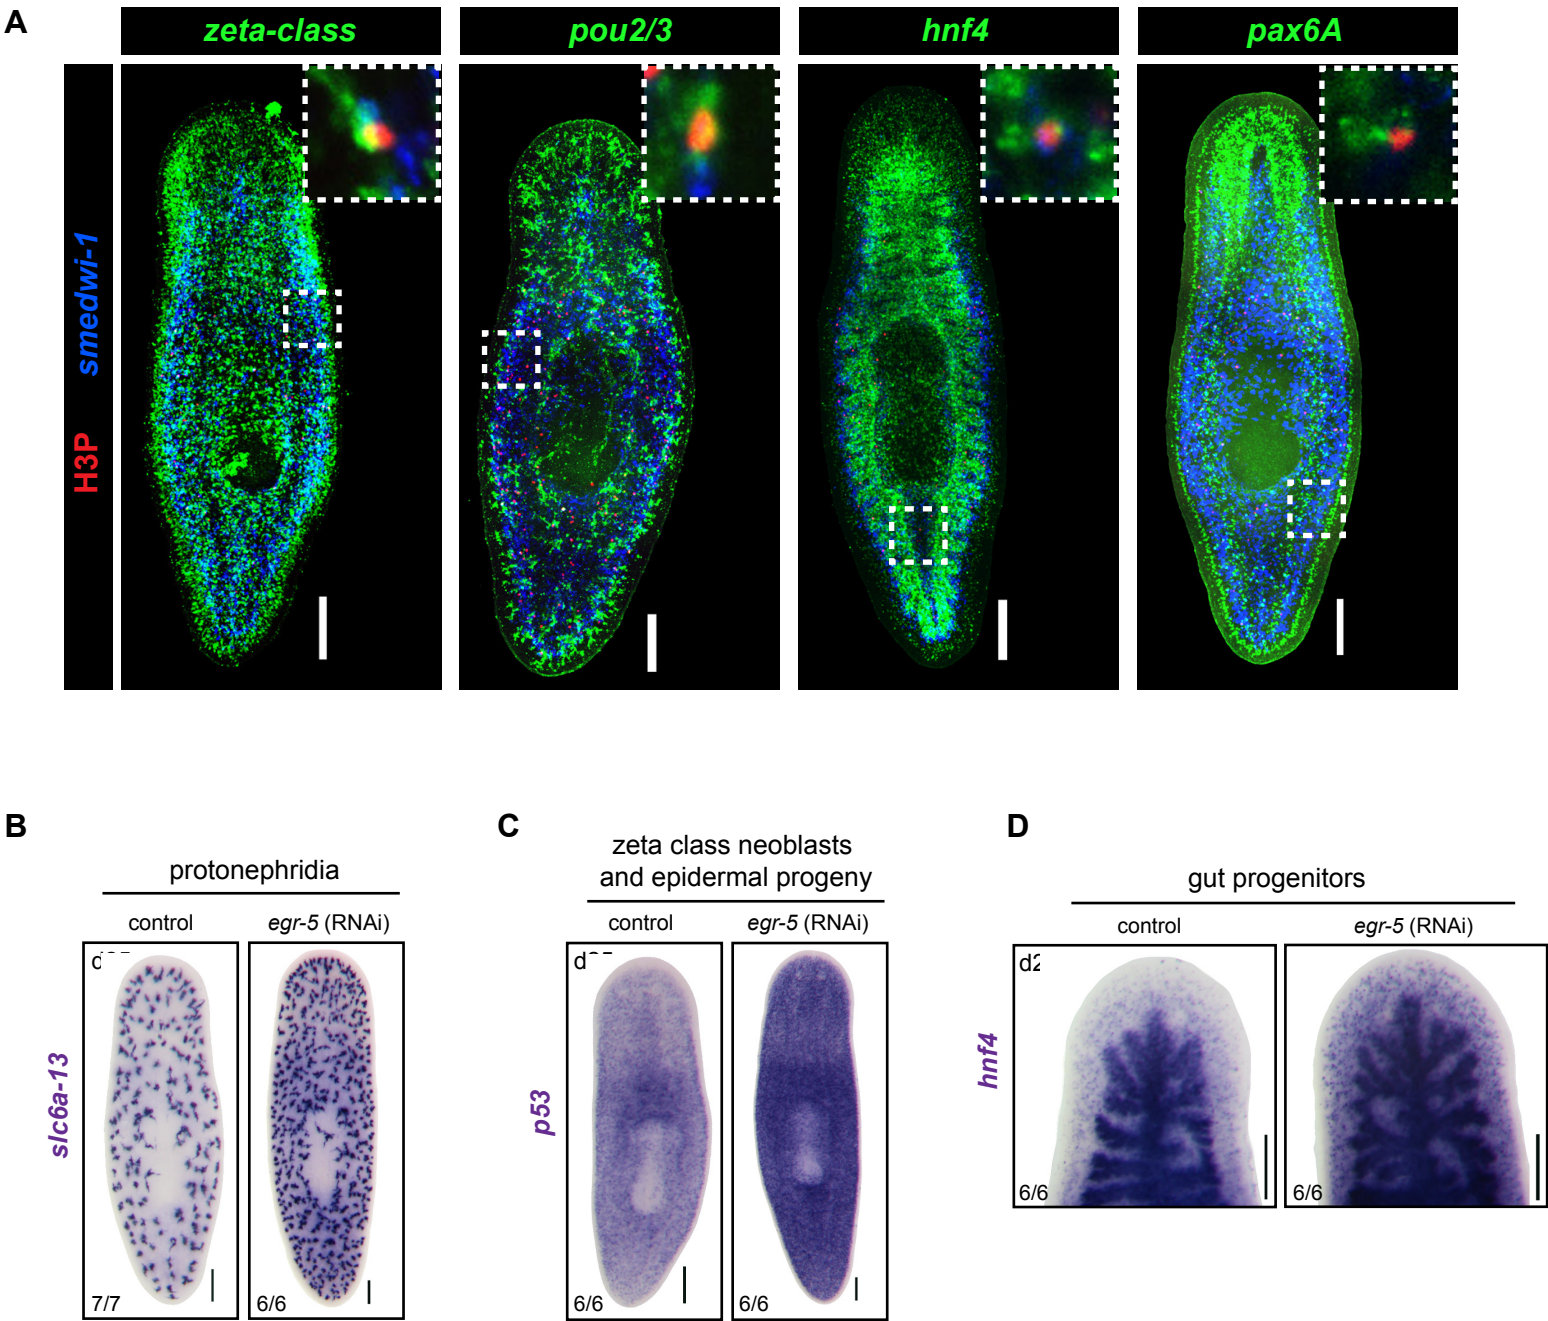

Supplement: supp [file elife_poa_e10501_Figure_6_figure_supplement_1.pdf › elife_poa_e10501_Figure_6_figure_supplement_1.pdf]

Figure 7- figure supplement 1.

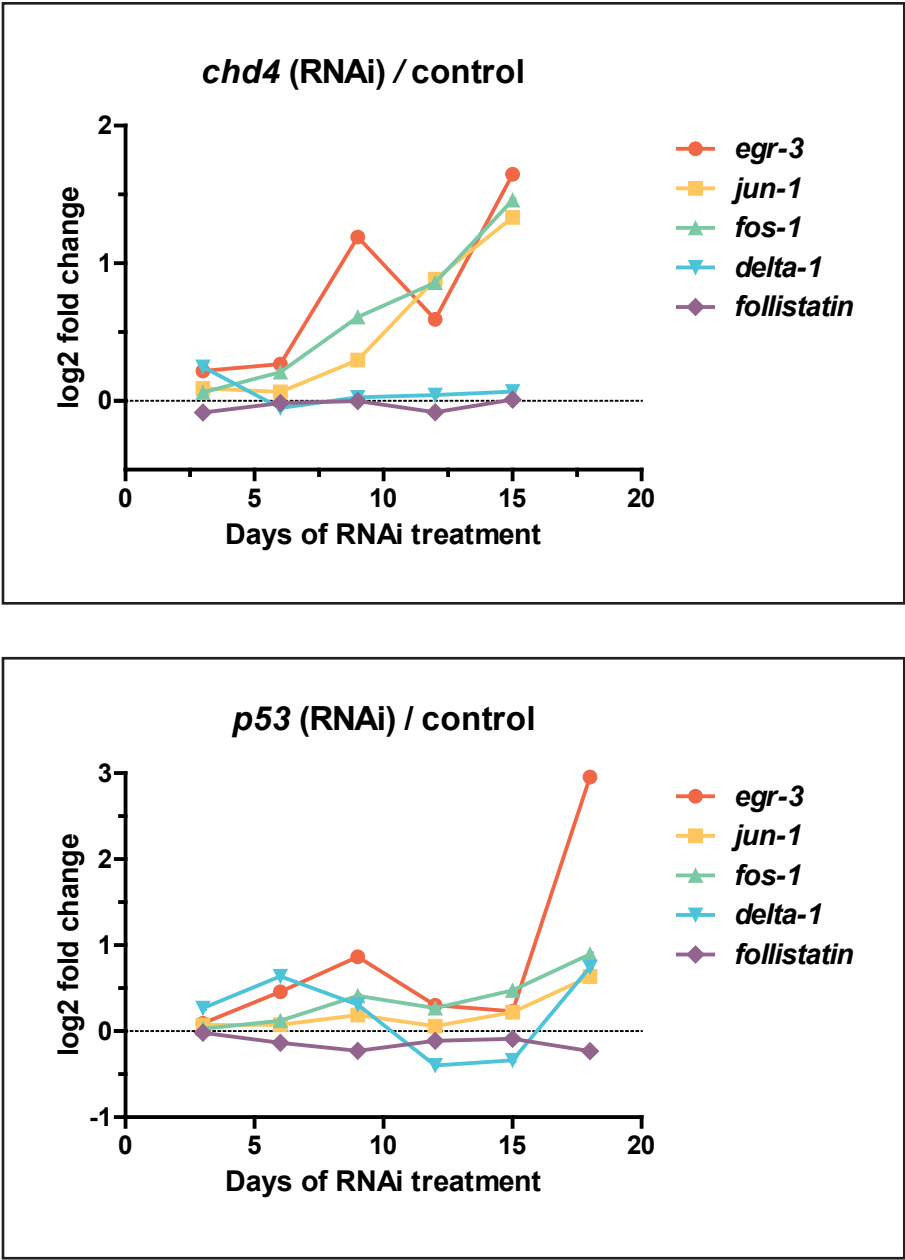

Supplement: supp [file elife_poa_e10501_Figure_7_figure_supplement_1.pdf › elife_poa_e10501_Figure_7_figure_supplement_1.pdf]
